# Supplementary material for: Microbial community characterization in Red Sea-derived samples using a field-deployable DNA extraction system and nanopore sequencing
Source: Research Square preprint supplement (doi:10.21203/rs.3.rs-5928577/v1), 2025-03-17
Supplement: Supplementary file 1 [file 48431f23652c4aab482dc65c.xlsx]

## Sheet: Table 2_Controls
Code	Microbiome	Controls	Filtration method	DNA extraction system	ng DNA/ul	Total ng of DNA	g coral or ml seawater used for DNA extraction	Yield (ng DNA/ml or g of sample)
C9	Coral 1 + ATCC	Positive	NA	xTitan in-field	1.68	67	0.5 g	134
C10	PBS in biopulverizer	Negative			0	0	2 ml	0
C11	Sea water + ATCC	Positive	Innovaprep		0	0	15 ml	0
C12	Saline solution	Negative			0	0	1500 ml	0
C21	Coral 1 + ATCC	Positive	NA	Qiagen	3.31	166	0.5 g	332
C22	PBS in biopulverizer	Negative			0	0	2 ml	0
C23	Sea water + ATCC	Positive	Millipore		0.514	26	15 ml	1.73333
C24	Saline solution	Negative			0	0	1500 ml	0
C33	Coral 1 + ATCC	Positive	NA	xTitan in-lab	1.67	67	0.5 g	134
C34	PBS in biopulverizer	Negative			0	0	2 ml	0
C35	Sea water + ATCC	Positive	Innovaprep		0	0	15 ml	0
C36	Saline solution	Negative			0	0	1500 ml	0
M9	Sediment 4 + ATCC	Positive	NA	xTitan in-field	0.08	3	0.25 g	12
M10	Spatula washed in PBS	Negative			0	0	2ml	0
M11	Sea water 4 + ATCC	Positive	Innovaprep		0	0	15 ml	0
M12	Saline solution	Negative			0	0	1500 ml	0
M21	Sediment 4 + ATCC	Positive	NA	Qiagen	2.23	112	0.25 g	448
M22	Spatula washed in PBS	Negative			0	0	2ml	0
M23	Sea water 4 + ATCC	Positive	Millipore		0.42	21	15 ml	1.4
M24	Saline solution	Negative			0.1	5	1500 ml	0.00333333
M33	Sediment 4 + ATCC	Positive	NA	xTitan in-lab	0.957	38	0.25 g	152
M34	Spatula washed in PBS	Negative			0	0	2ml	0
M35	Sea water 4 + ATCC	Positive	Innovaprep		0	0	15 ml	0
M36	Saline solution	Negative			0	0	1500 ml	0
