# Supplementary material for: Microbial community characterization in Red Sea-derived samples using a field-deployable DNA extraction system and nanopore sequencing
Source: Research Square preprint supplement (doi:10.21203/rs.3.rs-5928577/v1), 2025-03-17
Supplement: Supplementary file 2 [file 6f0d25443851974d5d238a5f.xlsx]

## Sheet: DESeqSpecies
ASV ID	baseMean	log2FoldChange	lfcSE	stat	pvalue	padj	Superkingdom	Kingdom	Phylum	Class	Order	Family	Genus	Species	Biome	Method	Species.y	Score1(uTitanL)	Score2	Total
sp294	608.525	25.3881	3.90683	6.49838	8.12E-11	2.85E-08	Bacteria	Bacteria_none	Bacteroidota	Flavobacteriia	Flavobacteriales	Flavobacteriaceae	Salegentibacter	Salegentibacter echinorum	Coral2	uTitan(L):uTitan(F)	Salegentibacter echinorum	3848	0	3848
sp578	422.551	24.8649	3.90686	6.36442	1.96E-10	3.44E-08	Bacteria	Bacteria_none	Bacteroidota	Cytophagia	Cytophagales	Mooreiaceae	Mooreia	Mooreia alkaloidigena	Coral2	uTitan(L):uTitan(F)	Mooreia alkaloidigena	2672	0	2672
sp578	153.771	23.9055	3.90698	6.11866	9.44E-10	2.10E-07	Bacteria	Bacteria_none	Bacteroidota	Cytophagia	Cytophagales	Mooreiaceae	Mooreia	Mooreia alkaloidigena	Coral2	uTitan(L):Qiagen	Mooreia alkaloidigena	2672	0	2672
sp895	197.55	24.3247	4.78515	5.08337	3.71E-07	1.63E-05	Bacteria	Bacteria_none	Cyanobacteria	Cyanobacteria_Incertae_sedis	Oscillatoriales	Oscillatoriales_Incertae_sedis	Potamolinea	Potamolinea magna	Coral-W	uTitan(L):uTitan(F)	Potamolinea magna	598	0	598
sp1124	156.559	23.7183	3.90703	6.07067	1.27E-09	1.49E-07	Bacteria	Bacteria_none	Bacteroidota	Flavobacteriia	Flavobacteriales	Flavobacteriaceae	Leeuwenhoekiella	Leeuwenhoekiella aequorea	Coral2	uTitan(L):uTitan(F)	Leeuwenhoekiella aequorea	990	0	990
sp1695	194.079	24.7611	3.90709	6.33747	2.34E-10	1.30E-08	Bacteria	Bacteria_none	Bacteroidota	Bacteroidia	Bacteroidales	Bacteroidaceae	Phocaeicola	Phocaeicola faecalis	Coral1	uTitan(L):Qiagen	Phocaeicola faecalis	647	0	647
sp1775	135.161	23.7949	4.78534	4.97245	6.61E-07	2.55E-05	Bacteria	Bacteria_none	Proteobacteria	Alphaproteobacteria	Hyphomicrobiales	Methylocystaceae	Methylocystis	Methylocystis echinoides	Coral-W	uTitan(L):uTitan(F)	Methylocystis echinoides	317	0	317
sp1360	85.3367	23.7581	3.01383	7.88305	3.19E-15	2.67E-12	Bacteria	Bacteria_none	Proteobacteria	Epsilonproteobacteria	Campylobacterales	Campylobacteraceae	Campylobacter	Campylobacter fetus	Mangrove: Sediment	uTitan(L):uTitan(F)	Campylobacter fetus	749	0	749
sp1695	143.293	24.2224	3.90716	6.19949	5.66E-10	8.67E-08	Bacteria	Bacteria_none	Bacteroidota	Bacteroidia	Bacteroidales	Bacteroidaceae	Phocaeicola	Phocaeicola faecalis	Coral1	uTitan(L):uTitan(F)	Phocaeicola faecalis	647	647	647
sp815	98.8378	23.4179	3.90719	5.99354	2.05E-09	1.63E-07	Bacteria	Bacteria_none	Cyanobacteria	Cyanobacteria_Incertae_sedis	Oscillatoriales	Microcoleaceae	Baaleninema	Baaleninema simplex	Coral2	uTitan(L):uTitan(F)	Baaleninema simplex	625	0	625
sp577	113.352	23.4109	3.3836	6.91894	4.55E-12	4.65E-10	Bacteria	Bacteria_none	Proteobacteria	Gammaproteobacteria	Oceanospirillales	Oceanospirillaceae	Litoribrevibacter	Litoribrevibacter albus	Mangrove: Water	uTitan(L):Qiagen	Litoribrevibacter albus	1396	0	1396
sp1005	110.511	23.3778	3.38361	6.90913	4.88E-12	4.73E-10	Bacteria	Bacteria_none	Proteobacteria	Alphaproteobacteria	Rhodobacterales	Rhodobacteraceae	Pelagivirga	Pelagivirga dicentrarchi	Mangrove: Water	uTitan(L):Qiagen	Pelagivirga dicentrarchi	1361	0	1361
sp1433	93.461	23.3397	3.90721	5.9735	2.32E-09	1.63E-07	Bacteria	Bacteria_none	Cyanobacteria	Gloeobacteria	Gloeobacterales	Gloeobacteraceae	Anthocerotibacter	Anthocerotibacter panamensis	Coral2	uTitan(L):uTitan(F)	Anthocerotibacter panamensis	591	0	591
sp577	101.614	23.2127	3.19656	7.26175	3.82E-13	1.12E-10	Bacteria	Bacteria_none	Proteobacteria	Gammaproteobacteria	Oceanospirillales	Oceanospirillaceae	Litoribrevibacter	Litoribrevibacter albus	Mangrove: Water	uTitan(L):uTitan(F)	Litoribrevibacter albus	1396	0	1396
sp1433	34.0115	21.8052	3.90777	5.57996	2.41E-08	1.65E-06	Bacteria	Bacteria_none	Cyanobacteria	Gloeobacteria	Gloeobacterales	Gloeobacteraceae	Anthocerotibacter	Anthocerotibacter panamensis	Coral2	uTitan(L):Qiagen	Anthocerotibacter panamensis	591	0	591
sp1005	99.0664	23.1863	3.19618	7.25436	4.04E-13	1.12E-10	Bacteria	Bacteria_none	Proteobacteria	Alphaproteobacteria	Rhodobacterales	Rhodobacteraceae	Pelagivirga	Pelagivirga dicentrarchi	Mangrove: Water	uTitan(L):uTitan(F)	Pelagivirga dicentrarchi	1361	0	1361
sp734	85.0796	23.2073	3.90726	5.93953	2.86E-09	1.67E-07	Bacteria	Bacteria_none	Cyanobacteria	Cyanobacteria_Incertae_sedis	Chroococcales	Geminocystaceae	Annamia	Annamia dubia	Coral2	uTitan(L):uTitan(F)	Annamia dubia	538	0	538
sp845	78.817	22.9151	2.64632	8.65922	4.75E-18	1.22E-14	Bacteria	Bacteria_none	Tenericutes	Mollicutes	Entomoplasmatales	Spiroplasmataceae	Spiroplasma	Spiroplasma citri	Mangrove: Sediment	uTitan(L):Qiagen	Spiroplasma citri	798	0	798
sp401	136.345	22.6597	4.78498	4.73559	2.18E-06	0.000106383	Bacteria	Bacteria_none	Proteobacteria	Alphaproteobacteria	Rhodobacterales	Rhodobacteraceae	Pelagivirga	Pelagivirga sediminicola	Coral-W	uTitan(L):Qiagen	Pelagivirga sediminicola	1009	0	1009
sp2333	35.4335	22.4945	3.03298	7.41662	1.20E-13	3.72E-11	Bacteria	Bacteria_none	Proteobacteria	Alphaproteobacteria	Rhodospirillales	Acetobacteraceae	Acetobacter	Acetobacter oryzoeni	Mangrove: Sediment	uTitan(L):uTitan(F)	Acetobacter oryzoeni	311	0	311
sp1862	76.2237	23.056	3.90731	5.90073	3.62E-09	1.71E-07	Bacteria	Bacteria_none	Verrucomicrobia	Opitutae	Opitutales	Opitutaceae	Ereboglobus	Ereboglobus luteus	Coral2	uTitan(L):uTitan(F)	Ereboglobus luteus	482	0	482
sp1862	27.7386	21.0909	3.908	5.39686	6.78E-08	3.72E-06	Bacteria	Bacteria_none	Verrucomicrobia	Opitutae	Opitutales	Opitutaceae	Ereboglobus	Ereboglobus luteus	Coral2	uTitan(L):Qiagen	Ereboglobus luteus	482	0	482
sp2127	66.7353	21.778	3.90739	5.57355	2.50E-08	3.65E-07	Bacteria	Bacteria_none	Proteobacteria	Alphaproteobacteria	Hyphomicrobiales	Stappiaceae	Pannonibacter	Pannonibacter indicus	Coral2	uTitan(L):uTitan(F)	Pannonibacter indicus	422	0	422
sp2127	24.2857	21.3371	3.90817	5.45962	4.77E-08	2.91E-06	Bacteria	Bacteria_none	Proteobacteria	Alphaproteobacteria	Hyphomicrobiales	Stappiaceae	Pannonibacter	Pannonibacter indicus	Coral2	uTitan(L):Qiagen	Pannonibacter indicus	422	0	422
sp2739	29.6513	22.2834	3.04751	7.31202	2.63E-13	7.34E-11	Bacteria	Bacteria_none	Actinobacteria	Actinomycetia	Micrococcales	Micrococcaceae	Nesterenkonia	Nesterenkonia lacusekhoensis	Mangrove: Sediment	uTitan(L):uTitan(F)	Nesterenkonia lacusekhoensis	271	0	271
sp61	47.4422	22.3931	3.90765	5.73059	1.00E-08	2.96E-07	Bacteria	Bacteria_none	Planctomycetota	Planctomycetia	Planctomycetales	Planctomycetaceae	Fuerstiella	Fuerstiella marisgermanici	Coral2	uTitan(L):uTitan(F)	Fuerstiella marisgermanici	300	0	300
sp577	96.0767	22.1709	4.78508	4.63333	3.60E-06	0.000165519	Bacteria	Bacteria_none	Proteobacteria	Gammaproteobacteria	Oceanospirillales	Oceanospirillaceae	Litoribrevibacter	Litoribrevibacter albus	Coral-W	uTitan(L):Qiagen	Litoribrevibacter albus	711	0	711
sp596	47.1259	21.0012	3.90766	5.37438	7.68E-08	6.92E-07	Bacteria	Bacteria_none	Planctomycetota	Planctomycetia	Pirellulales	Lacipirellulaceae	Bythopirellula	Bythopirellula polymerisocia	Coral2	uTitan(L):uTitan(F)	Bythopirellula polymerisocia	298	0	298
sp1654	43.4991	22.0887	2.73624	8.07265	6.88E-16	8.84E-13	Bacteria	Bacteria_none	Bacteroidota	Flavobacteriia	Flavobacteriales	Flavobacteriaceae	Neptunitalea	Neptunitalea chrysea	Mangrove: Sediment	uTitan(L):Qiagen	Neptunitalea chrysea	435	0	435
sp980	46.6514	22.3723	3.90767	5.72524	1.03E-08	2.96E-07	Bacteria	Bacteria_none	Bacteroidota	Flavobacteriia	Flavobacteriales	Flavobacteriaceae	Winogradskyella	Winogradskyella algicola	Coral2	uTitan(L):uTitan(F)	Winogradskyella algicola	295	0	295
sp363	44.7538	22.3143	3.9077	5.71034	1.13E-08	2.96E-07	Bacteria	Bacteria_none	Cyanobacteria	Cyanobacteria_Incertae_sedis	Synechococcales	Synechococcales_Incertae_sedis	Aegeococcus	Aegeococcus thureti	Coral2	uTitan(L):uTitan(F)	Aegeococcus thureti	283	0	283
sp895	80.8071	21.9319	4.78515	4.58332	4.58E-06	0.000172242	Bacteria	Bacteria_none	Cyanobacteria	Cyanobacteria_Incertae_sedis	Oscillatoriales	Oscillatoriales_Incertae_sedis	Potamolinea	Potamolinea magna	Coral-W	uTitan(L):Qiagen	Potamolinea magna	598	0	598
sp2748	22.8149	21.9181	3.09157	7.08964	1.34E-12	2.81E-10	Bacteria	Bacteria_none	Bacteroidota	Flavobacteriia	Flavobacteriales	Flavobacteriaceae	Flavobacterium	Flavobacterium suaedae	Mangrove: Sediment	uTitan(L):uTitan(F)	Flavobacterium suaedae	158	0	158
sp1421	22.3817	21.8911	3.09463	7.07391	1.51E-12	2.97E-10	Bacteria	Bacteria_none	Cyanobacteria	Cyanobacteria_Incertae_sedis	Oscillatoriales	Microcoleaceae	Symplocastrum	Symplocastrum torsivum	Mangrove: Sediment	uTitan(L):uTitan(F)	Symplocastrum torsivum	155	0	155
sp2166	22.3206	21.8896	3.08512	7.09521	1.29E-12	2.81E-10	Bacteria	Bacteria_none	Bacteroidota	Cytophagia	Cytophagales	Hymenobacteraceae	Adhaeribacter	Adhaeribacter terrae	Mangrove: Sediment	uTitan(L):uTitan(F)	Adhaeribacter terrae	204	0	204
sp363	16.2864	20.7825	3.90887	5.31675	1.06E-07	5.27E-06	Bacteria	Bacteria_none	Cyanobacteria	Cyanobacteria_Incertae_sedis	Synechococcales	Synechococcales_Incertae_sedis	Aegeococcus	Aegeococcus thureti	Coral2	uTitan(L):Qiagen	Aegeococcus thureti	283	0	283
sp1250	42.0006	21.8563	2.77493	7.87636	3.37E-15	2.89E-12	Bacteria	Bacteria_none	Proteobacteria	Gammaproteobacteria	Oceanospirillales	Halomonadaceae	Halomonas	Halomonas ventosae	Mangrove: Sediment	uTitan(L):Qiagen	Halomonas ventosae	415	0	415
sp265	42.8561	22.2489	3.90775	5.69353	1.24E-08	2.96E-07	Bacteria	Bacteria_none	Bacteroidota	Flavobacteriia	Flavobacteriales	Flavobacteriaceae	Poritiphilus	Poritiphilus flavus	Coral2	uTitan(L):uTitan(F)	Poritiphilus flavus	271	0	271
sp1680	15.308	19.7079	3.909	5.04168	4.61E-07	2.11E-05	Bacteria	Bacteria_none	Proteobacteria	Betaproteobacteria	Burkholderiales	Comamonadaceae	Curvibacter	Curvibacter gracilis	Coral2	uTitan(L):Qiagen	Curvibacter gracilis	266	0	266
sp194	39.0607	22.1222	3.90784	5.66098	1.51E-08	3.13E-07	Bacteria	Bacteria_none	Planctomycetota	Planctomycetia	Pirellulales	Lacipirellulaceae	Bythopirellula	Bythopirellula goksoeyrii	Coral2	uTitan(L):uTitan(F)	Bythopirellula goksoeyrii	247	0	247
sp2551	37.4793	22.0677	3.90789	5.64697	1.63E-08	3.18E-07	Bacteria	Bacteria_none	Proteobacteria	Betaproteobacteria	Burkholderiales	Burkholderiales_Incertae_sedis	Rhizobacter	Rhizobacter dauci	Coral2	uTitan(L):uTitan(F)	Rhizobacter dauci	237	0	237
sp942	36.3723	22.0234	3.90792	5.63559	1.74E-08	3.22E-07	Bacteria	Bacteria_none	Proteobacteria	Alphaproteobacteria	Rhodobacterales	Roseobacteraceae	Ruegeria	Ruegeria profundi	Coral2	uTitan(L):uTitan(F)	Ruegeria profundi	230	0	230
sp2722	32.8932	21.8841	3.90804	5.59976	2.15E-08	3.43E-07	Bacteria	Bacteria_none	Bacteroidota	Flavobacteriia	Flavobacteriales	Flavobacteriaceae	Spongitalea	Spongitalea numazuensis	Coral2	uTitan(L):uTitan(F)	Spongitalea numazuensis	208	0	208
sp190	32.1025	21.8523	3.90808	5.59157	2.25E-08	3.43E-07	Bacteria	Bacteria_none	Planctomycetota	Planctomycetia	Pirellulales	Lacipirellulaceae	Aeoliella	Aeoliella mucimassa	Coral2	uTitan(L):uTitan(F)	Aeoliella mucimassa	203	0	203
sp2199	25.0836	21.6024	3.06543	7.04708	1.83E-12	3.40E-10	Bacteria	Bacteria_none	Proteobacteria	Epsilonproteobacteria	Campylobacterales	Campylobacteraceae	Campylobacter	Campylobacter jejuni	Mangrove: Sediment	uTitan(L):uTitan(F)	Campylobacter jejuni	244	0	244
sp1309	33.3306	21.5599	3.38416	6.37084	1.88E-10	1.14E-08	Bacteria	Bacteria_none	Proteobacteria	Alphaproteobacteria	Hyphomicrobiales	Methylocystaceae	Methylocystis	Methylocystis silviterrae	Mangrove: Water	uTitan(L):Qiagen	Methylocystis silviterrae	349	0	349
sp2620	32.1025	21.8523	3.90808	5.59157	2.25E-08	3.43E-07	Bacteria	Bacteria_none	Proteobacteria	Alphaproteobacteria	Rhodospirillales	Rhodospirillaceae	Ferrovibrio	Ferrovibrio denitrificans	Coral2	uTitan(L):uTitan(F)	Ferrovibrio denitrificans	203	0	203
sp1309	29.6588	21.5043	3.2642	6.58791	4.46E-11	5.83E-09	Bacteria	Bacteria_none	Proteobacteria	Alphaproteobacteria	Hyphomicrobiales	Methylocystaceae	Methylocystis	Methylocystis silviterrae	Mangrove: Water	uTitan(L):uTitan(F)	Methylocystis silviterrae	349	0	349
sp1727	38.3477	21.497	3.22971	6.65601	2.81E-11	8.04E-09	Bacteria	Bacteria_none	Tenericutes	Mollicutes	Entomoplasmatales	Spiroplasmataceae	Spiroplasma	Spiroplasma leucomae	Mangrove: Sediment	uTitan(L):Qiagen	Spiroplasma leucomae	377	0	377
sp2739	27.5656	21.4545	3.27071	6.55959	5.40E-11	1.17E-08	Bacteria	Bacteria_none	Actinobacteria	Actinomycetia	Micrococcales	Micrococcaceae	Nesterenkonia	Nesterenkonia lacusekhoensis	Mangrove: Sediment	uTitan(L):Qiagen	Nesterenkonia lacusekhoensis	271	0	271
sp3271	15.7286	21.4003	3.15431	6.78444	1.17E-11	1.77E-09	Bacteria	Bacteria_none	Thermotogae	Thermotogae	Petrotogales	Petrotogaceae	Marinitoga	Marinitoga hydrogenitolerans	Mangrove: Sediment	uTitan(L):uTitan(F)	Marinitoga hydrogenitolerans	153	0	153
sp167	29.5723	21.7333	3.90819	5.56096	2.68E-08	3.77E-07	Bacteria	Bacteria_none	Proteobacteria	Alphaproteobacteria	Rhodospirillales	Geminicoccaceae	Arboricoccus	Arboricoccus pini	Coral2	uTitan(L):uTitan(F)	Arboricoccus pini	187	0	187
sp32	27.2002	21.6216	3.90831	5.5322	3.16E-08	4.27E-07	Bacteria	Bacteria_none	Planctomycetota	Planctomycetia	Pirellulales	Pirellulaceae	Aureliella	Aureliella helgolandensis	Coral2	uTitan(L):uTitan(F)	Aureliella helgolandensis	172	0	172
sp667	25.3025	21.5177	3.90843	5.50545	3.68E-08	4.79E-07	Bacteria	Bacteria_none	Bacteroidota	Cytophagia	Cytophagales	Roseivirgaceae	Roseivirga	Roseivirga halotolerans	Coral2	uTitan(L):uTitan(F)	Roseivirga halotolerans	160	0	160
sp136	22.9304	21.3842	3.9086	5.47107	4.47E-08	5.57E-07	Bacteria	Bacteria_none	Bacteroidota	Saprospiria	Saprospirales	Haliscomenobacteraceae	Portibacter	Portibacter lacus	Coral2	uTitan(L):uTitan(F)	Portibacter lacus	145	0	145
sp2440	14.873	21.3233	3.18137	6.70257	2.05E-11	2.74E-09	Bacteria	Bacteria_none	Cyanobacteria	Cyanobacteria_Incertae_sedis	Chroococcales	Geminocystaceae	Cyanobacterium	Cyanobacterium stanieri	Mangrove: Sediment	uTitan(L):uTitan(F)	Cyanobacterium stanieri	103	0	103
sp2622	24.9642	21.311	3.38442	6.29678	3.04E-10	1.73E-08	Bacteria	Bacteria_none	Proteobacteria	Alphaproteobacteria	Hyphomicrobiales	Methylocystaceae	Methylocystis	Methylocystis rosea	Mangrove: Water	uTitan(L):Qiagen	Methylocystis rosea	307	0	307
sp377	22.6141	21.365	3.90863	5.46611	4.60E-08	5.57E-07	Bacteria	Bacteria_none	Bacteroidota	Flavobacteriia	Flavobacteriales	Flavobacteriaceae	Eudoraea	Eudoraea chungangensis	Coral2	uTitan(L):uTitan(F)	Eudoraea chungangensis	143	0	143
sp1942	22.1397	21.335	3.90867	5.45839	4.80E-08	5.62E-07	Bacteria	Bacteria_none	Proteobacteria	Alphaproteobacteria	Hyphomicrobiales	Parvibaculaceae	Kaustia	Kaustia mangrovi	Coral2	uTitan(L):uTitan(F)	Kaustia mangrovi	140	0	140
sp3676	14.2239	21.26	3.18371	6.67774	2.43E-11	3.12E-09	Bacteria	Bacteria_none	Firmicutes	Bacilli	Bacillales	Bacillaceae	Alkalibacillus	Alkalibacillus aidingensis	Mangrove: Sediment	uTitan(L):uTitan(F)	Alkalibacillus aidingensis	130	0	130
sp2062	23.7003	21.249	3.29687	6.44521	1.15E-10	1.85E-08	Bacteria	Bacteria_none	Proteobacteria	Gammaproteobacteria	Cardiobacteriales	Cardiobacteriaceae	Suttonella	Suttonella ornithocola	Mangrove: Sediment	uTitan(L):Qiagen	Suttonella ornithocola	233	0	233
sp300	21.6652	21.3051	3.90871	5.45066	5.02E-08	5.68E-07	Bacteria	Bacteria_none	Planctomycetota	Planctomycetia	Planctomycetales	Planctomycetaceae	Maioricimonas	Maioricimonas rarisocia	Coral2	uTitan(L):uTitan(F)	Maioricimonas rarisocia	137	0	137
sp487	21.0327	21.2635	3.90877	5.43996	5.33E-08	5.84E-07	Bacteria	Bacteria_none	Proteobacteria	Gammaproteobacteria	Chromatiales	Ectothiorhodospiraceae	Acidihalobacter	Acidihalobacter ferrooxydans	Coral2	uTitan(L):uTitan(F)	Acidihalobacter ferrooxydans	133	0	133
sp869	20.7164	21.2431	3.9088	5.43468	5.49E-08	5.84E-07	Bacteria	Bacteria_none	Bacteroidota	Flavobacteriia	Flavobacteriales	Crocinitomicaceae	Crocinitomix	Crocinitomix algicola	Coral2	uTitan(L):uTitan(F)	Crocinitomix algicola	131	0	131
sp2622	23.3914	21.177	3.30061	6.41609	1.40E-10	1.24E-08	Bacteria	Bacteria_none	Proteobacteria	Alphaproteobacteria	Hyphomicrobiales	Methylocystaceae	Methylocystis	Methylocystis rosea	Mangrove: Water	uTitan(L):uTitan(F)	Methylocystis rosea	307	0	307
sp1208	20.4001	21.2211	3.90883	5.42901	5.67E-08	5.85E-07	Bacteria	Bacteria_none	Proteobacteria	Alphaproteobacteria	Hyphomicrobiales	Hyphomicrobiaceae	Methyloceanibacter	Methyloceanibacter caenitepidi	Coral2	uTitan(L):uTitan(F)	Methyloceanibacter caenitepidi	129	0	129
sp2815	17.8875	21.1257	3.12386	6.76269	1.35E-11	1.97E-09	Bacteria	Bacteria_none	Proteobacteria	Alphaproteobacteria	Rhodobacterales	Roseobacteraceae	Octadecabacter	Octadecabacter antarcticus	Mangrove: Sediment	uTitan(L):uTitan(F)	Octadecabacter antarcticus	174	0	174
sp89	20.0838	21.1987	3.90886	5.42323	5.85E-08	5.87E-07	Bacteria	Bacteria_none	Proteobacteria	Gammaproteobacteria	Chromatiales	Granulosicoccaceae	Granulosicoccus	Granulosicoccus marinus	Coral2	uTitan(L):uTitan(F)	Granulosicoccus marinus	127	0	127
sp231	19.6094	21.1667	3.90891	5.41497	6.13E-08	5.98E-07	Bacteria	Bacteria_none	Planctomycetota	Planctomycetia	Planctomycetales	Planctomycetaceae	Rubinisphaera	Rubinisphaera brasiliensis	Coral2	uTitan(L):uTitan(F)	Rubinisphaera brasiliensis	124	0	124
sp2130	36.896	22.3727	3.90851	5.72411	1.04E-08	3.33E-07	Bacteria	Bacteria_none	Proteobacteria	Gammaproteobacteria	Alteromonadales	Alteromonadaceae	Saccharobesus	Saccharobesus litoralis	Coral1	uTitan(L):Qiagen	Saccharobesus litoralis	123	0	123
sp1418	18.1862	21.0616	3.90908	5.38787	7.13E-08	6.59E-07	Bacteria	Bacteria_none	Spirochaetes	Spirochaetia	Spirochaetales	Spirochaetaceae	Spirochaeta	Spirochaeta halophila	Coral2	uTitan(L):uTitan(F)	Spirochaeta halophila	115	0	115
sp3396	11.8492	21.0087	3.24302	6.47813	9.29E-11	9.47E-09	Bacteria	Bacteria_none	Proteobacteria	Deltaproteobacteria	Desulfobacterales	Desulfobacteraceae	Desulfocicer	Desulfocicer vacuolatum	Mangrove: Sediment	uTitan(L):uTitan(F)	Desulfocicer vacuolatum	104	0	104
sp3633	11.8168	21.0025	3.24247	6.47731	9.34E-11	9.47E-09	Bacteria	Bacteria_none	Firmicutes	Clostridia	Eubacteriales	Lachnospiraceae	Lachnoclostridium	[Clostridium] scindens	Mangrove: Sediment	uTitan(L):uTitan(F)	[Clostridium] scindens	108	0	108
sp2938	18.1862	21.0616	3.90908	5.38787	7.13E-08	6.59E-07	Bacteria	Bacteria_none	Proteobacteria	Alphaproteobacteria	Hyphomicrobiales	Stappiaceae	Roseibium	Roseibium litorale	Coral2	uTitan(L):uTitan(F)	Roseibium litorale	115	0	115
sp2488	20.3539	20.9257	3.3196	6.30368	2.91E-10	4.40E-08	Bacteria	Bacteria_none	Firmicutes	Clostridia	Halanaerobiales	Halobacteroidaceae	Halanaerobacter	Halanaerobacter chitinivorans	Mangrove: Sediment	uTitan(L):Qiagen	Halanaerobacter chitinivorans	247	0	247
sp3216	11.2697	20.9228	3.25921	6.41958	1.37E-10	1.24E-08	Bacteria	Bacteria_none	Firmicutes	Clostridia	Eubacteriales	Desulfallaceae	Desulfoscipio	Desulfoscipio geothermicus	Mangrove: Sediment	uTitan(L):uTitan(F)	Desulfoscipio geothermicus	103	0	103
sp3550	11.0509	20.9107	3.26638	6.40181	1.54E-10	1.35E-08	Bacteria	Bacteria_none	Firmicutes	Bacilli	Bacillales	Staphylococcaceae	Salinicoccus	Salinicoccus salitudinis	Mangrove: Sediment	uTitan(L):uTitan(F)	Salinicoccus salitudinis	101	0	101
sp3291	12.0278	20.9104	3.23413	6.46554	1.01E-10	9.66E-09	Bacteria	Bacteria_none	Firmicutes	Bacilli	Bacillales	Bacillaceae	Bacillus	Bacillus thermozeamaize	Mangrove: Sediment	uTitan(L):uTitan(F)	Bacillus thermozeamaize	117	0	117
sp3612	12.0278	20.9104	3.23413	6.46554	1.01E-10	9.66E-09	Bacteria	Bacteria_none	Firmicutes	Bacilli	Bacillales	Bacillaceae	Lentibacillus	Lentibacillus salarius	Mangrove: Sediment	uTitan(L):uTitan(F)	Lentibacillus salarius	117	0	117
sp3869	16.1303	20.8926	3.90938	5.34424	9.08E-08	7.97E-07	Bacteria	Bacteria_none	Proteobacteria	Betaproteobacteria	Burkholderiales	Oxalobacteraceae	Massilia	Massilia polaris	Coral2	uTitan(L):uTitan(F)	Massilia polaris	102	0	102
sp3059	10.9377	20.8887	3.27169	6.38467	1.72E-10	1.44E-08	Bacteria	Bacteria_none	Proteobacteria	Deltaproteobacteria	Desulfobacterales	Desulfobacteraceae	Desulfocicer	Desulfocicer niacini	Mangrove: Sediment	uTitan(L):uTitan(F)	Desulfocicer niacini	96	0	96
sp4140	10.832	20.8784	3.27384	6.37734	1.80E-10	1.44E-08	Bacteria	Bacteria_none	Firmicutes	Bacilli	Bacillales	Bacillales_Incertae_sedis	Gemella	Gemella bergeri	Mangrove: Sediment	uTitan(L):uTitan(F)	Gemella bergeri	99	0	99
sp1216	10.6855	20.8617	3.28874	6.34337	2.25E-10	1.71E-08	Bacteria	Bacteria_none	Cyanobacteria	Cyanobacteria_Incertae_sedis	Chroococcales	Aphanothecaceae	Gloeothece	Gloeothece citriformis	Mangrove: Sediment	uTitan(L):uTitan(F)	Gloeothece citriformis	74	0	74
sp4030	10.6132	20.8547	3.28122	6.35578	2.07E-10	1.61E-08	Bacteria	Bacteria_none	Tenericutes	Mollicutes	Entomoplasmatales	Entomoplasmatales_Incertae_sedis	Williamsoniiplasma	Williamsoniiplasma lucivorax	Mangrove: Sediment	uTitan(L):uTitan(F)	Williamsoniiplasma lucivorax	97	0	97
sp1342	15.6559	20.853	3.90946	5.33398	9.61E-08	8.23E-07	Bacteria	Bacteria_none	Proteobacteria	Alphaproteobacteria	Rhodobacterales	Roseobacteraceae	Ruegeria	Ruegeria halocynthiae	Coral2	uTitan(L):uTitan(F)	Ruegeria halocynthiae	99	0	99
sp2350	10.3944	20.8251	3.28937	6.33104	2.44E-10	1.81E-08	Bacteria	Bacteria_none	Firmicutes	Clostridia	Eubacteriales	Lachnospiraceae	Tyzzerella	[Clostridium] colinum	Mangrove: Sediment	uTitan(L):uTitan(F)	[Clostridium] colinum	95	0	95
sp111	15.3396	20.8245	3.90951	5.32662	1.00E-07	8.36E-07	Bacteria	Bacteria_none	Planctomycetota	Planctomycetia	Planctomycetales	Planctomycetaceae	Symmachiella	Symmachiella dynata	Coral2	uTitan(L):uTitan(F)	Symmachiella dynata	97	0	97
sp54	15.0233	20.796	3.90957	5.31925	1.04E-07	8.51E-07	Bacteria	Bacteria_none	Chloroflexi	Candidatus Thermofonsia	Phototrophicales	Phototrophicaceae	Phototrophicus	Phototrophicus methaneseepsis	Coral2	uTitan(L):uTitan(F)	Phototrophicus methaneseepsis	95	0	95
sp4214	10.1755	20.7946	3.29787	6.30548	2.87E-10	2.05E-08	Bacteria	Bacteria_none	Tenericutes	Mollicutes	Entomoplasmatales	Spiroplasmataceae	Spiroplasma	Spiroplasma floricola	Mangrove: Sediment	uTitan(L):uTitan(F)	Spiroplasma floricola	93	0	93
sp6	14.5489	19.6824	3.90966	5.03429	4.80E-07	3.74E-06	Bacteria	Bacteria_none	Proteobacteria	Alphaproteobacteria	Rhodobacterales	Rhodobacteraceae	Tritonibacter	Tritonibacter mobilis	Coral2	uTitan(L):uTitan(F)	Tritonibacter mobilis	92	0	92
sp3361	14.3908	20.7355	3.90969	5.3036	1.14E-07	9.06E-07	Bacteria	Bacteria_none	Cyanobacteria	Cyanobacteria_Incertae_sedis	Nostocales	Symphyonemataceae	Symphyonema	Symphyonema bifilamentata	Coral2	uTitan(L):uTitan(F)	Symphyonema bifilamentata	91	0	91
sp3884	9.66334	20.7237	3.31693	6.24785	4.16E-10	2.84E-08	Bacteria	Bacteria_none	Firmicutes	Bacilli	Bacillales	Bacillaceae	Alkalihalobacillus	Alkalihalobacillus shacheensis	Mangrove: Sediment	uTitan(L):uTitan(F)	Alkalihalobacillus shacheensis	94	0	94
sp4054	9.66334	20.7237	3.31693	6.24785	4.16E-10	2.84E-08	Bacteria	Bacteria_none	Actinobacteria	Actinomycetia	Geodermatophilales	Geodermatophilaceae	Geodermatophilus	Geodermatophilus dictyosporus	Mangrove: Sediment	uTitan(L):uTitan(F)	Geodermatophilus dictyosporus	94	0	94
sp2898	16.1489	20.7158	3.38504	6.1198	9.37E-10	1.31E-07	Bacteria	Bacteria_none	Firmicutes	Clostridia	Eubacteriales	Peptococcaceae	Desulfovectis	Desulfovectis peckii	Mangrove: Sediment	uTitan(L):Qiagen	Desulfovectis peckii	169	0	169
sp3582	11.6166	20.704	3.24611	6.37809	1.79E-10	1.44E-08	Bacteria	Bacteria_none	Firmicutes	Clostridia	Eubacteriales	Lachnospiraceae	Anaerotaenia	Anaerotaenia torta	Mangrove: Sediment	uTitan(L):uTitan(F)	Anaerotaenia torta	113	0	113
sp3969	9.40965	20.6878	3.33064	6.21134	5.25E-10	3.52E-08	Bacteria	Bacteria_none	Actinobacteria	Actinomycetia	Corynebacteriales	Corynebacteriaceae	Corynebacterium	Corynebacterium caspium	Mangrove: Sediment	uTitan(L):uTitan(F)	Corynebacterium caspium	86	0	86
sp2815	16.6267	20.6608	3.37875	6.11491	9.66E-10	1.31E-07	Bacteria	Bacteria_none	Proteobacteria	Alphaproteobacteria	Rhodobacterales	Roseobacteraceae	Octadecabacter	Octadecabacter antarcticus	Mangrove: Sediment	uTitan(L):Qiagen	Octadecabacter antarcticus	174	0	174
sp2155	8.88687	20.608	3.35764	6.13764	8.38E-10	5.10E-08	Bacteria	Bacteria_none	Proteobacteria	Gammaproteobacteria	Alteromonadales	Pseudoalteromonadaceae	Pseudoalteromonas	Pseudoalteromonas luteoviolacea	Mangrove: Sediment	uTitan(L):uTitan(F)	Pseudoalteromonas luteoviolacea	78	0	78
sp3188	14.8592	20.5892	2.83993	7.24989	4.17E-13	5.78E-11	Bacteria	Bacteria_none	Firmicutes	Bacilli	Bacillales	Staphylococcaceae	Macrococcus	Macrococcus caseolyticus	Mangrove: Water	uTitan(L):Qiagen	Macrococcus caseolyticus	183	0	183
sp3271	14.62	20.5754	3.38522	6.07801	1.22E-09	1.56E-07	Bacteria	Bacteria_none	Thermotogae	Thermotogae	Petrotogales	Petrotogaceae	Marinitoga	Marinitoga hydrogenitolerans	Mangrove: Sediment	uTitan(L):Qiagen	Marinitoga hydrogenitolerans	153	0	153
sp4331	8.53433	20.5498	3.37512	6.08862	1.14E-09	6.81E-08	Bacteria	Bacteria_none	Firmicutes	Bacilli	Bacillales	Planococcaceae	Planococcus	Planococcus maitriensis	Mangrove: Sediment	uTitan(L):uTitan(F)	Planococcus maitriensis	78	0	78
sp3084	8.42973	20.5334	3.3787	6.07731	1.22E-09	7.05E-08	Bacteria	Bacteria_none	Tenericutes	Mollicutes	Mycoplasmatales	Mycoplasmataceae	Mycoplasma	Mycoplasma mycoides	Mangrove: Sediment	uTitan(L):uTitan(F)	Mycoplasma mycoides	82	0	82
sp3157	8.42973	20.5334	3.3787	6.07731	1.22E-09	7.05E-08	Bacteria	Bacteria_none	Bacteroidota	Sphingobacteriia	Sphingobacteriales	Sphingobacteriaceae	Sphingobacterium	Sphingobacterium shayense	Mangrove: Sediment	uTitan(L):uTitan(F)	Sphingobacterium shayense	82	0	82
sp4036	8.32692	20.5168	3.38461	6.0618	1.35E-09	7.64E-08	Bacteria	Bacteria_none	Firmicutes	Clostridia	Halanaerobiales	Halanaerobiaceae	Halanaerobium	Halanaerobium sehlinense	Mangrove: Sediment	uTitan(L):uTitan(F)	Halanaerobium sehlinense	81	0	81
sp4429	8.09667	20.4766	3.38783	6.04417	1.50E-09	8.25E-08	Bacteria	Bacteria_none	Proteobacteria	Alphaproteobacteria	Sphingomonadales	Sphingosinicellaceae	Sandarakinorhabdus	Sandarakinorhabdus rubra	Mangrove: Sediment	uTitan(L):uTitan(F)	Sandarakinorhabdus rubra	74	0	74
sp1607	8.08933	20.4764	3.38784	6.04409	1.50E-09	8.25E-08	Bacteria	Bacteria_none	Bacteroidota	Flavobacteriia	Flavobacteriales	Flavobacteriaceae	Wenyingzhuangia	Wenyingzhuangia fucanilytica	Mangrove: Sediment	uTitan(L):uTitan(F)	Wenyingzhuangia fucanilytica	71	0	71
sp3452	9.73789	20.4697	3.31598	6.17304	6.70E-10	4.31E-08	Bacteria	Bacteria_none	Actinobacteria	Actinomycetia	Frankiales	Frankiaceae	Frankia	Frankia casuarinae	Mangrove: Sediment	uTitan(L):uTitan(F)	Frankia casuarinae	89	0	89
sp3676	13.2234	20.4362	3.38541	6.03656	1.57E-09	1.93E-07	Bacteria	Bacteria_none	Firmicutes	Bacilli	Bacillales	Bacillaceae	Alkalibacillus	Alkalibacillus aidingensis	Mangrove: Sediment	uTitan(L):Qiagen	Alkalibacillus aidingensis	130	0	130
sp4304	7.71012	20.411	3.38806	6.0244	1.70E-09	9.17E-08	Bacteria	Bacteria_none	Firmicutes	Bacilli	Lactobacillales	Enterococcaceae	Enterococcus	Enterococcus sulfureus	Mangrove: Sediment	uTitan(L):uTitan(F)	Enterococcus sulfureus	75	0	75
sp3995	7.65901	20.3995	3.38809	6.02094	1.73E-09	9.22E-08	Bacteria	Bacteria_none	Proteobacteria	Deltaproteobacteria	Desulfuromonadales	Geobacteraceae	Geobacter	Geobacter soli	Mangrove: Sediment	uTitan(L):uTitan(F)	Geobacter soli	70	0	70
sp3188	13.3205	20.3947	3.38516	6.02474	1.69E-09	1.30E-07	Bacteria	Bacteria_none	Firmicutes	Bacilli	Bacillales	Staphylococcaceae	Macrococcus	Macrococcus caseolyticus	Mangrove: Water	uTitan(L):uTitan(F)	Macrococcus caseolyticus	183	0	183
sp3966	9.8473	20.3878	3.31131	6.15702	7.41E-10	4.60E-08	Bacteria	Bacteria_none	Proteobacteria	Betaproteobacteria	Burkholderiales	Burkholderiaceae	Chitinimonas	Chitinimonas lacunae	Mangrove: Sediment	uTitan(L):uTitan(F)	Chitinimonas lacunae	90	0	90
sp3837	7.44018	20.3613	3.38823	6.00941	1.86E-09	9.74E-08	Bacteria	Bacteria_none	Actinobacteria	Actinomycetia	Pseudonocardiales	Pseudonocardiaceae	Pseudonocardia	Pseudonocardia petroleophila	Mangrove: Sediment	uTitan(L):uTitan(F)	Pseudonocardia petroleophila	68	0	68
sp671	11.7191	20.2165	3.3854	5.97168	2.35E-09	1.74E-07	Bacteria	Bacteria_none	Proteobacteria	Gammaproteobacteria	Oceanospirillales	Alcanivoracaceae	Alcanivorax	Alcanivorax profundimaris	Mangrove: Water	uTitan(L):uTitan(F)	Alcanivorax profundimaris	161	0	161
sp3444	10.9856	20.1693	3.38583	5.95698	2.57E-09	2.62E-07	Bacteria	Bacteria_none	Firmicutes	Bacilli	Bacillales	Paenibacillaceae	Paenibacillus	Paenibacillus albilobatus	Mangrove: Sediment	uTitan(L):Qiagen	Paenibacillus albilobatus	108	0	108
sp3633	10.9856	20.1693	3.38583	5.95698	2.57E-09	2.62E-07	Bacteria	Bacteria_none	Firmicutes	Clostridia	Eubacteriales	Lachnospiraceae	Lachnoclostridium	[Clostridium] scindens	Mangrove: Sediment	uTitan(L):Qiagen	[Clostridium] scindens	108	0	108
sp2921	10.8838	20.166	3.38585	5.95595	2.59E-09	2.62E-07	Bacteria	Bacteria_none	Proteobacteria	Gammaproteobacteria	Nevskiales	Steroidobacteraceae	Steroidobacter	Steroidobacter agariperforans	Mangrove: Sediment	uTitan(L):Qiagen	Steroidobacter agariperforans	107	0	107
sp3582	10.7978	20.1546	3.38587	5.95255	2.64E-09	2.62E-07	Bacteria	Bacteria_none	Firmicutes	Clostridia	Eubacteriales	Lachnospiraceae	Anaerotaenia	Anaerotaenia torta	Mangrove: Sediment	uTitan(L):Qiagen	Anaerotaenia torta	113	0	113
sp3216	10.477	20.1105	3.38595	5.9394	2.86E-09	2.72E-07	Bacteria	Bacteria_none	Firmicutes	Clostridia	Eubacteriales	Desulfallaceae	Desulfoscipio	Desulfoscipio geothermicus	Mangrove: Sediment	uTitan(L):Qiagen	Desulfoscipio geothermicus	103	0	103
sp3634	10.2245	20.0805	3.38601	5.93044	3.02E-09	2.77E-07	Bacteria	Bacteria_none	Chloroflexi	Chloroflexia	Chloroflexales	Chloroflexaceae	Chloroflexus	Chloroflexus islandicus	Mangrove: Sediment	uTitan(L):Qiagen	Chloroflexus islandicus	107	0	107
sp4140	10.0701	20.059	3.38605	5.92401	3.14E-09	2.79E-07	Bacteria	Bacteria_none	Firmicutes	Bacilli	Bacillales	Bacillales_Incertae_sedis	Gemella	Gemella bergeri	Mangrove: Sediment	uTitan(L):Qiagen	Gemella bergeri	99	0	99
sp4030	9.86666	20.0278	3.38611	5.91469	3.33E-09	2.85E-07	Bacteria	Bacteria_none	Tenericutes	Mollicutes	Entomoplasmatales	Entomoplasmatales_Incertae_sedis	Williamsoniiplasma	Williamsoniiplasma lucivorax	Mangrove: Sediment	uTitan(L):Qiagen	Williamsoniiplasma lucivorax	97	0	97
sp2350	9.66322	20.0005	3.38617	5.90654	3.49E-09	2.90E-07	Bacteria	Bacteria_none	Firmicutes	Clostridia	Eubacteriales	Lachnospiraceae	Tyzzerella	[Clostridium] colinum	Mangrove: Sediment	uTitan(L):Qiagen	[Clostridium] colinum	95	0	95
sp4214	9.45978	19.9682	3.38623	5.89688	3.70E-09	2.98E-07	Bacteria	Bacteria_none	Tenericutes	Mollicutes	Entomoplasmatales	Spiroplasmataceae	Spiroplasma	Spiroplasma floricola	Mangrove: Sediment	uTitan(L):Qiagen	Spiroplasma floricola	93	0	93
sp2678	9.36213	19.9053	3.38591	5.87886	4.13E-09	2.96E-07	Bacteria	Bacteria_none	Proteobacteria	Alphaproteobacteria	Rhodobacterales	Roseobacteraceae	Sulfitobacter	Sulfitobacter noctilucicola	Mangrove: Water	uTitan(L):uTitan(F)	Sulfitobacter noctilucicola	124	0	124
sp3452	9.05291	19.9039	3.38636	5.87766	4.16E-09	3.18E-07	Bacteria	Bacteria_none	Actinobacteria	Actinomycetia	Frankiales	Frankiaceae	Frankia	Frankia casuarinae	Mangrove: Sediment	uTitan(L):Qiagen	Frankia casuarinae	89	0	89
sp4054	8.98224	19.8985	3.38638	5.87603	4.20E-09	3.18E-07	Bacteria	Bacteria_none	Actinobacteria	Actinomycetia	Geodermatophilales	Geodermatophilaceae	Geodermatophilus	Geodermatophilus dictyosporus	Mangrove: Sediment	uTitan(L):Qiagen	Geodermatophilus dictyosporus	94	0	94
sp3969	8.74776	19.8627	3.38646	5.86532	4.48E-09	3.29E-07	Bacteria	Bacteria_none	Actinobacteria	Actinomycetia	Corynebacteriales	Corynebacteriaceae	Corynebacterium	Corynebacterium caspium	Mangrove: Sediment	uTitan(L):Qiagen	Corynebacterium caspium	86	0	86
sp3396	8.57007	19.8353	3.38652	5.85713	4.71E-09	3.36E-07	Bacteria	Bacteria_none	Proteobacteria	Deltaproteobacteria	Desulfobacterales	Desulfobacteraceae	Desulfocicer	Desulfocicer vacuolatum	Mangrove: Sediment	uTitan(L):Qiagen	Desulfocicer vacuolatum	104	0	104
sp2645	8.66194	19.7967	3.38612	5.84643	5.02E-09	3.38E-07	Bacteria	Bacteria_none	Deinococcus-Thermus	Deinococci	Deinococcales	Deinococcaceae	Deinococcus	Deinococcus wulumuqiensis	Mangrove: Water	uTitan(L):uTitan(F)	Deinococcus wulumuqiensis	119	0	119
sp1627	8.34089	19.7927	3.38661	5.8444	5.08E-09	3.53E-07	Bacteria	Bacteria_none	Firmicutes	Bacilli	Bacillales	Bacillales_Incertae_sedis	Gemella	Gemella cuniculi	Mangrove: Sediment	uTitan(L):Qiagen	Gemella cuniculi	82	0	82
sp4331	7.93401	19.7238	3.38678	5.82377	5.75E-09	3.78E-07	Bacteria	Bacteria_none	Firmicutes	Bacilli	Bacillales	Planococcaceae	Planococcus	Planococcus maitriensis	Mangrove: Sediment	uTitan(L):Qiagen	Planococcus maitriensis	78	0	78
sp3084	7.83558	19.711	3.38682	5.81992	5.89E-09	3.78E-07	Bacteria	Bacteria_none	Tenericutes	Mollicutes	Mycoplasmatales	Mycoplasmataceae	Mycoplasma	Mycoplasma mycoides	Mangrove: Sediment	uTitan(L):Qiagen	Mycoplasma mycoides	82	0	82
sp3157	7.83558	19.711	3.38682	5.81992	5.89E-09	3.78E-07	Bacteria	Bacteria_none	Bacteroidota	Sphingobacteriia	Sphingobacteriales	Sphingobacteriaceae	Sphingobacterium	Sphingobacterium shayense	Mangrove: Sediment	uTitan(L):Qiagen	Sphingobacterium shayense	82	0	82
sp173	13.9164	19.1737	3.9098	4.90402	9.39E-07	7.01E-06	Bacteria	Bacteria_none	Planctomycetota	Planctomycetia	Planctomycetales	Planctomycetaceae	Rubinisphaera	Rubinisphaera italica	Coral2	uTitan(L):uTitan(F)	Rubinisphaera italica	88	0	88
sp3770	13.9164	19.1737	3.9098	4.90402	9.39E-07	7.01E-06	Bacteria	Bacteria_none	Cyanobacteria	Cyanobacteria_Incertae_sedis	Chroococcidiopsidales	Chroococcidiopsidales_Incertae_sedis	Compactococcus	Compactococcus sarcinoides	Coral2	uTitan(L):uTitan(F)	Compactococcus sarcinoides	88	0	88
sp1940	23.9974	21.8478	3.90945	5.58847	2.29E-08	5.50E-07	Bacteria	Bacteria_none	Bacteroidota	Bacteroidia	Bacteroidales	Bacteroidaceae	Bacteroides	Bacteroides coprosuis	Coral1	uTitan(L):Qiagen	Bacteroides coprosuis	80	0	80
sp1940	17.7178	21.0929	3.91001	5.3946	6.87E-08	2.63E-06	Bacteria	Bacteria_none	Bacteroidota	Bacteroidia	Bacteroidales	Bacteroidaceae	Bacteroides	Bacteroides coprosuis	Coral1	uTitan(L):uTitan(F)	Bacteroides coprosuis	80	80	80
sp1456	14.1285	18.9236	2.86514	6.60475	3.98E-11	3.09E-09	Bacteria	Bacteria_none	Actinobacteria	Actinomycetia	Micrococcales	Dermabacteraceae	Brachybacterium	Brachybacterium epidermidis	Mangrove: Water	uTitan(L):Qiagen	Brachybacterium epidermidis	174	0	174
sp2713	15.08	18.7698	3.38516	5.54474	2.94E-08	1.80E-06	Bacteria	Bacteria_none	Bacteroidota	Bacteroidia	Bacteroidales	Porphyromonadaceae	Porphyromonas	Porphyromonas endodontalis	Mangrove: Sediment	uTitan(L):Qiagen	Porphyromonas endodontalis	183	0	183
sp3966	9.15463	18.47	3.38632	5.45429	4.92E-08	2.94E-06	Bacteria	Bacteria_none	Proteobacteria	Betaproteobacteria	Burkholderiales	Burkholderiaceae	Chitinimonas	Chitinimonas lacunae	Mangrove: Sediment	uTitan(L):Qiagen	Chitinimonas lacunae	90	0	90
sp344	182.988	10.4418	1.59532	6.54529	5.94E-11	1.17E-08	Bacteria	Bacteria_none	Proteobacteria	Gammaproteobacteria	Oceanospirillales	Oceanospirillaceae	Marinomonas	Marinomonas primoryensis	Mangrove: Sediment	uTitan(L):Qiagen	Marinomonas primoryensis	2109	0	2109
sp1406	89.4569	9.81081	2.18852	4.48286	7.37E-06	0.000352258	Bacteria	Bacteria_none	Firmicutes	Clostridia	Halanaerobiales	Halanaerobiaceae	Halanaerobium	Halanaerobium saccharolyticum	Mangrove: Sediment	uTitan(L):uTitan(F)	Halanaerobium saccharolyticum	815	0	815
sp947	116.26	9.78725	2.2974	4.26014	2.04E-05	0.000577275	Bacteria	Bacteria_none	Proteobacteria	Deltaproteobacteria	Desulfuromonadales	Geobacteraceae	Geomonas	Geomonas terrae	Mangrove: Sediment	uTitan(L):Qiagen	Geomonas terrae	1170	0	1170
sp721	106.555	9.66154	1.49294	6.4715	9.70E-11	1.66E-08	Bacteria	Bacteria_none	Tenericutes	Mollicutes	Entomoplasmatales	Spiroplasmataceae	Spiroplasma	Spiroplasma insolitum	Mangrove: Sediment	uTitan(L):Qiagen	Spiroplasma insolitum	1193	0	1193
sp928	104.753	9.63684	1.61917	5.95171	2.65E-09	2.62E-07	Bacteria	Bacteria_none	Proteobacteria	Alphaproteobacteria	Rhodospirillales	Thalassospiraceae	Magnetospira	Magnetospira thiophila	Mangrove: Sediment	uTitan(L):Qiagen	Magnetospira thiophila	1128	0	1128
sp869	77.5192	9.60408	1.69966	5.65059	1.60E-08	8.24E-07	Bacteria	Bacteria_none	Bacteroidota	Flavobacteriia	Flavobacteriales	Crocinitomicaceae	Crocinitomix	Crocinitomix algicola	Mangrove: Sediment	uTitan(L):uTitan(F)	Crocinitomix algicola	671	0	671
sp877	95.6649	9.506	2.20779	4.30566	1.66E-05	0.000492008	Bacteria	Bacteria_none	Proteobacteria	Gammaproteobacteria	Aeromonadales	Aeromonadaceae	Dongshaea	Dongshaea marina	Mangrove: Sediment	uTitan(L):Qiagen	Dongshaea marina	1021	0	1021
sp937	92.287	9.4541	2.21921	4.26011	2.04E-05	0.000577275	Bacteria	Bacteria_none	Firmicutes	Bacilli	Bacillales	Staphylococcaceae	Abyssicoccus	Abyssicoccus albus	Mangrove: Sediment	uTitan(L):Qiagen	Abyssicoccus albus	963	0	963
sp874	90.3255	9.26335	1.6669	5.55722	2.74E-08	1.75E-06	Bacteria	Bacteria_none	Cyanobacteria	Cyanobacteria_Incertae_sedis	Oscillatoriales	Microcoleaceae	Planktothrix	Planktothrix mougeotii	Coral-W	uTitan(L):Qiagen	Planktothrix mougeotii	588	0	588
sp1406	79.7258	9.24295	2.18227	4.23548	2.28E-05	0.000633396	Bacteria	Bacteria_none	Firmicutes	Clostridia	Halanaerobiales	Halanaerobiaceae	Halanaerobium	Halanaerobium saccharolyticum	Mangrove: Sediment	uTitan(L):Qiagen	Halanaerobium saccharolyticum	815	0	815
sp1829	59.7268	9.22814	2.19991	4.19478	2.73E-05	0.00121929	Bacteria	Bacteria_none	Firmicutes	Clostridia	Halanaerobiales	Halanaerobiaceae	Halanaerobium	Halanaerobium alcaliphilum	Mangrove: Sediment	uTitan(L):uTitan(F)	Halanaerobium alcaliphilum	556	0	556
sp275	79.3058	9.22324	1.12474	8.20034	2.40E-16	4.65E-14	Bacteria	Bacteria_none	Cyanobacteria	Cyanobacteria_Incertae_sedis	Oscillatoriales	Laspinemataceae	Perforafilum	Perforafilum tunnelli	Mangrove: Water	uTitan(L):Qiagen	Perforafilum tunnelli	935	0	935
sp958	69.1377	9.02517	1.12324	8.03495	9.36E-16	1.65E-13	Bacteria	Bacteria_none	Firmicutes	Clostridia	Eubacteriales	Lachnospiraceae	Faecalicatena	Faecalicatena orotica	Mangrove: Water	uTitan(L):Qiagen	Faecalicatena orotica	812	0	812
sp690	67.6147	9.00504	1.79574	5.01466	5.31E-07	2.58E-05	Bacteria	Bacteria_none	Proteobacteria	Gammaproteobacteria	Alteromonadales	Pseudoalteromonadaceae	Pseudoalteromonas	Pseudoalteromonas phenolica	Mangrove: Sediment	uTitan(L):Qiagen	Pseudoalteromonas phenolica	692	0	692
sp2037	48.2471	8.92013	1.73609	5.13807	2.78E-07	1.39E-05	Bacteria	Bacteria_none	Firmicutes	Clostridia	Halanaerobiales	Halanaerobiaceae	Halanaerobium	Halanaerobium congolense	Mangrove: Sediment	uTitan(L):uTitan(F)	Halanaerobium congolense	424	0	424
sp678	60.1594	8.8244	2.77787	3.17668	0.00148971	0.0108241	Bacteria	Bacteria_none	Proteobacteria	Alphaproteobacteria	Rhodospirillales	Thalassospiraceae	Thalassospira	Thalassospira tepidiphila	Mangrove: Water	uTitan(L):Qiagen	Thalassospira tepidiphila	719	0	719
sp1510	59.4508	8.81951	2.21772	3.97683	6.98E-05	0.00152168	Bacteria	Bacteria_none	Proteobacteria	Gammaproteobacteria	Methylococcales	Methylococcaceae	Methylovulum	Methylovulum miyakonense	Mangrove: Sediment	uTitan(L):Qiagen	Methylovulum miyakonense	602	0	602
sp682	58.8166	8.80416	2.11524	4.16225	3.15E-05	0.000802171	Bacteria	Bacteria_none	Proteobacteria	Gammaproteobacteria	Alteromonadales	Pseudoalteromonadaceae	Pseudoalteromonas	Pseudoalteromonas piratica	Mangrove: Sediment	uTitan(L):Qiagen	Pseudoalteromonas piratica	629	0	629
sp1008	56.254	8.73973	1.69503	5.1561	2.52E-07	1.30E-05	Bacteria	Bacteria_none	Planctomycetota	Planctomycetia	Isosphaerales	Isosphaeraceae	Aquisphaera	Aquisphaera giovannonii	Mangrove: Sediment	uTitan(L):Qiagen	Aquisphaera giovannonii	603	0	603
sp1829	54.8173	8.70243	2.20255	3.95107	7.78E-05	0.0016396	Bacteria	Bacteria_none	Firmicutes	Clostridia	Halanaerobiales	Halanaerobiaceae	Halanaerobium	Halanaerobium alcaliphilum	Mangrove: Sediment	uTitan(L):Qiagen	Halanaerobium alcaliphilum	556	0	556
sp1053	54.4961	8.6939	1.7205	5.05313	4.35E-07	2.19E-05	Bacteria	Bacteria_none	Firmicutes	Clostridia	Eubacteriales	Oscillospiraceae	Hydrogenoanaerobacterium	Hydrogenoanaerobacterium saccharovorans	Mangrove: Sediment	uTitan(L):Qiagen	Hydrogenoanaerobacterium saccharovorans	580	0	580
sp1927	41.2075	8.69284	2.20075	3.94994	7.82E-05	0.00335534	Bacteria	Bacteria_none	Spirochaetes	Spirochaetia	Spirochaetales	Spirochaetaceae	Sediminispirochaeta	Sediminispirochaeta bajacaliforniensis	Mangrove: Sediment	uTitan(L):uTitan(F)	Sediminispirochaeta bajacaliforniensis	389	0	389
sp4090	24.3033	8.6395	2.75562	3.13523	0.00171719	0.0202261	Bacteria	Bacteria_none	Bacteroidota	Flavobacteriia	Flavobacteriales	Flavobacteriaceae	Muricauda	Muricauda indica	Coral-W	uTitan(L):uTitan(F)	Muricauda indica	57	0	57
sp2165	38.6061	8.59821	2.61261	3.29105	0.000998157	0.032763	Bacteria	Bacteria_none	Proteobacteria	Deltaproteobacteria	Myxococcales	Nannocystaceae	Nannocystis	Nannocystis pusilla	Mangrove: Sediment	uTitan(L):uTitan(F)	Nannocystis pusilla	322	0	322
sp1647	49.2226	8.54716	2.67129	3.19964	0.00137599	0.0149901	Bacteria	Bacteria_none	Firmicutes	Clostridia	Eubacteriales	Clostridiaceae	Clostridium	Clostridium pasteurianum	Mangrove: Sediment	uTitan(L):Qiagen	Clostridium pasteurianum	491	0	491
sp1947	36.2082	8.50614	2.2911	3.71269	0.000205064	0.00847599	Bacteria	Bacteria_none	Actinobacteria	Actinomycetia	Corynebacteriales	Nocardiaceae	Rhodococcus	Rhodococcus humicola	Mangrove: Sediment	uTitan(L):uTitan(F)	Rhodococcus humicola	332	0	332
sp1530	36.0642	8.49949	2.61594	3.24911	0.00115766	0.0365647	Bacteria	Bacteria_none	Bacteroidota	Flavobacteriia	Flavobacteriales	Flavobacteriaceae	Nonlabens	Nonlabens ponticola	Mangrove: Sediment	uTitan(L):uTitan(F)	Nonlabens ponticola	266	0	266
sp414	46.3897	8.44898	1.20661	7.00226	2.52E-12	2.71E-10	Bacteria	Bacteria_none	Lentisphaerae	Lentisphaeria	Lentisphaerales	Lentisphaeraceae	Lentisphaera	Lentisphaera araneosa	Mangrove: Water	uTitan(L):Qiagen	Lentisphaera araneosa	535	0	535
sp449	51.3367	8.44777	1.8404	4.59018	4.43E-06	0.000172242	Bacteria	Bacteria_none	Proteobacteria	Alphaproteobacteria	Hyphomicrobiales	Nitrobacteraceae	Afipia	[Pseudomonas] carboxydohydrogena	Coral-W	uTitan(L):Qiagen	[Pseudomonas] carboxydohydrogena	323	0	323
sp111	21.1654	8.44374	2.43525	3.4673	0.00052572	0.0081938	Bacteria	Bacteria_none	Planctomycetota	Planctomycetia	Planctomycetales	Planctomycetaceae	Symmachiella	Symmachiella dynata	Coral-W	uTitan(L):uTitan(F)	Symmachiella dynata	60	0	60
sp1471	45.8023	8.44324	2.15716	3.91405	9.08E-05	0.00186677	Bacteria	Bacteria_none	Proteobacteria	Gammaproteobacteria	Alteromonadales	Colwelliaceae	Thalassomonas	Thalassomonas viridans	Mangrove: Sediment	uTitan(L):Qiagen	Thalassomonas viridans	478	0	478
sp128	45.6177	8.43714	1.60675	5.25107	1.51E-07	8.45E-06	Bacteria	Bacteria_none	Proteobacteria	Alphaproteobacteria	Rhodospirillales	Stellaceae	Constrictibacter	Constrictibacter antarcticus	Mangrove: Sediment	uTitan(L):Qiagen	Constrictibacter antarcticus	487	0	487
sp27	45.571	8.43591	1.56757	5.38153	7.39E-08	4.32E-06	Bacteria	Bacteria_none	Proteobacteria	Alphaproteobacteria	Rhodospirillales	Thalassobaculaceae	Oceanibaculum	Oceanibaculum indicum	Mangrove: Sediment	uTitan(L):Qiagen	Oceanibaculum indicum	504	0	504
sp1820	34.4295	8.43258	2.61436	3.22549	0.00125756	0.0393487	Bacteria	Bacteria_none	Firmicutes	Bacilli	Bacillales	Bacillaceae	Halobacillus	Halobacillus locisalis	Mangrove: Sediment	uTitan(L):uTitan(F)	Halobacillus locisalis	257	0	257
sp1461	45.1077	8.4212	2.66648	3.15817	0.00158762	0.0165332	Bacteria	Bacteria_none	Deinococcus-Thermus	Deinococci	Thermales	Thermaceae	Meiothermus	Meiothermus taiwanensis	Mangrove: Sediment	uTitan(L):Qiagen	Meiothermus taiwanensis	452	0	452
sp806	49.1584	8.40201	1.44202	5.82658	5.66E-09	3.70E-07	Bacteria	Bacteria_none	Firmicutes	Clostridia	Eubacteriales	Peptostreptococcaceae	Romboutsia	Romboutsia hominis	Mangrove: Water	uTitan(L):uTitan(F)	Romboutsia hominis	634	0	634
sp1466	44.0169	8.38593	2.66176	3.15052	0.0016298	0.0167608	Bacteria	Bacteria_none	Proteobacteria	Alphaproteobacteria	Kordiimonadales	Kordiimonadaceae	Kordiimonas	Kordiimonas lipolytica	Mangrove: Sediment	uTitan(L):Qiagen	Kordiimonas lipolytica	450	0	450
sp1395	43.4995	8.36873	1.61952	5.16742	2.37E-07	1.25E-05	Bacteria	Bacteria_none	Armatimonadetes	Fimbriimonadia	Fimbriimonadales	Fimbriimonadaceae	Fimbriimonas	Fimbriimonas ginsengisoli	Mangrove: Sediment	uTitan(L):Qiagen	Fimbriimonas ginsengisoli	475	0	475
sp2029	32.8402	8.36479	2.27287	3.68027	0.000232984	0.00939797	Bacteria	Bacteria_none	Bacteroidota	Flavobacteriia	Flavobacteriales	Flavobacteriaceae	Arenibacter	Arenibacter nanhaiticus	Mangrove: Sediment	uTitan(L):uTitan(F)	Arenibacter nanhaiticus	274	0	274
sp743	42.3853	8.33104	1.65545	5.0325	4.84E-07	2.39E-05	Bacteria	Bacteria_none	Proteobacteria	Gammaproteobacteria	Oceanospirillales	Litoricolaceae	Litoricola	Litoricola marina	Mangrove: Sediment	uTitan(L):Qiagen	Litoricola marina	447	0	447
sp414	47.0889	8.32395	1.84825	4.5037	6.68E-06	0.000230397	Bacteria	Bacteria_none	Lentisphaerae	Lentisphaeria	Lentisphaerales	Lentisphaeraceae	Lentisphaera	Lentisphaera araneosa	Coral-W	uTitan(L):Qiagen	Lentisphaera araneosa	314	0	314
sp964	46.1073	8.29339	1.85514	4.47049	7.80E-06	0.000258472	Bacteria	Bacteria_none	Proteobacteria	Gammaproteobacteria	Oceanospirillales	Alcanivoracaceae	Alcanivorax	Alcanivorax dieselolei	Coral-W	uTitan(L):Qiagen	Alcanivorax dieselolei	304	0	304
sp1759	40.9038	8.27997	1.82382	4.53991	5.63E-06	0.000192918	Bacteria	Bacteria_none	Firmicutes	Clostridia	Eubacteriales	Eubacteriales Family XIII. Incertae Sedis	Mogibacterium	Mogibacterium timidum	Mangrove: Sediment	uTitan(L):Qiagen	Mogibacterium timidum	437	0	437
sp2652	30.3329	8.25086	1.80626	4.56792	4.93E-06	0.000242527	Bacteria	Bacteria_none	Cyanobacteria	Cyanobacteria_Incertae_sedis	Nostocales	Nostocaceae	Nostoc	Nostoc indistinguendum	Mangrove: Sediment	uTitan(L):uTitan(F)	Nostoc indistinguendum	272	0	272
sp1934	40.0193	8.24849	2.27054	3.63283	0.000280333	0.00443308	Bacteria	Bacteria_none	Firmicutes	Bacilli	Bacillales	Thermoactinomycetaceae	Laceyella	Laceyella putida	Mangrove: Sediment	uTitan(L):Qiagen	Laceyella putida	414	0	414
sp1844	38.8032	8.20426	1.72718	4.75008	2.03E-06	8.30E-05	Bacteria	Bacteria_none	Actinobacteria	Actinomycetia	Micrococcales	Microbacteriaceae	Amnibacterium	Amnibacterium flavum	Mangrove: Sediment	uTitan(L):Qiagen	Amnibacterium flavum	442	0	442
sp476	42.7863	8.20175	1.4003	5.85713	4.71E-09	3.27E-07	Bacteria	Bacteria_none	Proteobacteria	Oligoflexia	Bdellovibrionales	Bdellovibrionaceae	Bdellovibrio	Bdellovibrio bacteriovorus	Mangrove: Water	uTitan(L):uTitan(F)	Bdellovibrio bacteriovorus	554	0	554
sp1172	38.6731	8.19903	1.73739	4.71917	2.37E-06	9.09E-05	Bacteria	Bacteria_none	Proteobacteria	Gammaproteobacteria	Alteromonadales	Shewanellaceae	Shewanella	Shewanella mangrovi	Mangrove: Sediment	uTitan(L):Qiagen	Shewanella mangrovi	417	0	417
sp1699	38.6259	8.19695	1.75322	4.67537	2.93E-06	0.000109333	Bacteria	Bacteria_none	Proteobacteria	Gammaproteobacteria	Chromatiales	Ectothiorhodospiraceae	Ectothiorhodospira	Ectothiorhodospira variabilis	Mangrove: Sediment	uTitan(L):Qiagen	Ectothiorhodospira variabilis	399	0	399
sp1248	37.7185	8.16303	1.70258	4.79451	1.63E-06	7.35E-05	Bacteria	Bacteria_none	Firmicutes	Bacilli	Bacillales	Bacillaceae	Lysinibacillus	Lysinibacillus varians	Mangrove: Sediment	uTitan(L):Qiagen	Lysinibacillus varians	412	0	412
sp1098	37.1986	8.13066	1.21801	6.67538	2.47E-11	1.99E-09	Bacteria	Bacteria_none	Chloroflexi	Chloroflexi_Incertae_sedis	Chloroflexi_Incertae_sedis_Incertae_sedis	Chloroflexi_Incertae_sedis_Incertae_sedis_Incertae_sedis	Thermobaculum	Thermobaculum terrenum	Mangrove: Water	uTitan(L):Qiagen	Thermobaculum terrenum	433	0	433
sp991	40.4557	8.12089	1.4788	5.49155	3.98E-08	2.27E-06	Bacteria	Bacteria_none	Tenericutes	Mollicutes	Mycoplasmatales	Mycoplasmataceae	Mesomycoplasma	Mesomycoplasma ovipneumoniae	Mangrove: Water	uTitan(L):uTitan(F)	Mesomycoplasma ovipneumoniae	521	0	521
sp1517	36.6111	8.12006	1.70256	4.76933	1.85E-06	7.79E-05	Bacteria	Bacteria_none	Proteobacteria	Gammaproteobacteria	Oceanospirillales	Oceanospirillaceae	Amphritea	Amphritea opalescens	Mangrove: Sediment	uTitan(L):Qiagen	Amphritea opalescens	403	0	403
sp2859	16.4559	8.07897	2.62371	3.07921	0.00207547	0.0232321	Bacteria	Bacteria_none	Proteobacteria	Alphaproteobacteria	Rhodobacterales	Rhodobacteraceae	Fuscibacter	Fuscibacter oryzae	Coral-W	uTitan(L):uTitan(F)	Fuscibacter oryzae	44	0	44
sp1883	35.4923	8.07544	1.69734	4.7577	1.96E-06	8.12E-05	Bacteria	Bacteria_none	Proteobacteria	Alphaproteobacteria	Rhodobacterales	Rhodobacteraceae	Acidimangrovimonas	Acidimangrovimonas pyrenivorans	Mangrove: Sediment	uTitan(L):Qiagen	Acidimangrovimonas pyrenivorans	398	0	398
sp1922	16.2753	8.06207	2.6433	3.05	0.00228838	0.0244648	Bacteria	Bacteria_none	Proteobacteria	Gammaproteobacteria	Oceanospirillales	Oceanospirillaceae	Marinomonas	Marinomonas mediterranea	Coral-W	uTitan(L):uTitan(F)	Marinomonas mediterranea	42	0	42
sp2895	26.5467	8.05764	1.79923	4.47838	7.52E-06	0.00035466	Bacteria	Bacteria_none	Proteobacteria	Deltaproteobacteria	Desulfuromonadales	Geobacteraceae	Geobacter	Geobacter grbiciae	Mangrove: Sediment	uTitan(L):uTitan(F)	Geobacter grbiciae	222	0	222
sp561	34.858	8.04974	1.77524	4.53444	5.78E-06	0.000195385	Bacteria	Bacteria_none	Firmicutes	Clostridia	Eubacteriales	Oscillospiraceae	Fastidiosipila	Fastidiosipila sanguinis	Mangrove: Sediment	uTitan(L):Qiagen	Fastidiosipila sanguinis	406	0	406
sp1596	34.5302	8.0356	2.14865	3.73984	0.000184138	0.00333393	Bacteria	Bacteria_none	Proteobacteria	Alphaproteobacteria	Iodidimonadales	Iodidimonadaceae	Iodidimonas	Iodidimonas gelatinilytica	Mangrove: Sediment	uTitan(L):Qiagen	Iodidimonas gelatinilytica	363	0	363
sp1293	34.3258	8.02693	1.79591	4.46957	7.84E-06	0.00025834	Bacteria	Bacteria_none	Proteobacteria	Alphaproteobacteria	Hyphomicrobiales	Rhizobiaceae	Ensifer	Ensifer numidicus	Mangrove: Sediment	uTitan(L):Qiagen	Ensifer numidicus	367	0	367
sp1579	25.9655	8.02581	1.8509	4.33616	1.45E-05	0.000664974	Bacteria	Bacteria_none	Bacteroidota	Flavobacteriia	Flavobacteriales	Flavobacteriaceae	Aurantiacicella	Aurantiacicella marina	Mangrove: Sediment	uTitan(L):uTitan(F)	Aurantiacicella marina	218	0	218
sp2075	34.2292	8.02291	1.67326	4.79478	1.63E-06	7.35E-05	Bacteria	Bacteria_none	Firmicutes	Bacilli	Bacillales	Bacillaceae	Metabacillus	Metabacillus flavus	Mangrove: Sediment	uTitan(L):Qiagen	Metabacillus flavus	374	0	374
sp1504	37.7785	8.02222	1.45777	5.50308	3.73E-08	2.18E-06	Bacteria	Bacteria_none	Proteobacteria	Gammaproteobacteria	Alteromonadales	Ferrimonadaceae	Paraferrimonas	Paraferrimonas haliotis	Mangrove: Water	uTitan(L):uTitan(F)	Paraferrimonas haliotis	491	0	491
sp1731	34.2205	8.02222	1.94215	4.13058	3.62E-05	0.000903235	Bacteria	Bacteria_none	Proteobacteria	Alphaproteobacteria	Sphingomonadales	Sphingomonadaceae	Sphingomonas	Sphingomonas molluscorum	Mangrove: Sediment	uTitan(L):Qiagen	Sphingomonas molluscorum	344	0	344
sp1341	33.8869	8.00817	1.67612	4.77781	1.77E-06	7.72E-05	Bacteria	Bacteria_none	Proteobacteria	Gammaproteobacteria	Vibrionales	Vibrionaceae	Vibrio	Vibrio mytili	Mangrove: Sediment	uTitan(L):Qiagen	Vibrio mytili	363	0	363
sp2983	25.65	8.00737	1.87599	4.26835	1.97E-05	0.000890937	Bacteria	Bacteria_none	Firmicutes	Clostridia	Halanaerobiales	Halanaerobiaceae	Halanaerobium	Halanaerobium lacusrosei	Mangrove: Sediment	uTitan(L):uTitan(F)	Halanaerobium lacusrosei	203	0	203
sp1491	37.3309	8.00499	1.43953	5.56085	2.68E-08	1.66E-06	Bacteria	Bacteria_none	Bacteroidota	Bacteroidia	Bacteroidales	Prevotellaceae	Prevotella	Prevotella pallens	Mangrove: Water	uTitan(L):uTitan(F)	Prevotella pallens	484	0	484
sp1947	33.3082	7.98346	2.31238	3.45248	0.000555458	0.00736125	Bacteria	Bacteria_none	Actinobacteria	Actinomycetia	Corynebacteriales	Nocardiaceae	Rhodococcus	Rhodococcus humicola	Mangrove: Sediment	uTitan(L):Qiagen	Rhodococcus humicola	332	0	332
sp1268	33.1702	7.97753	2.28467	3.49176	0.000479842	0.00670475	Bacteria	Bacteria_none	Proteobacteria	Gammaproteobacteria	Alteromonadales	Alteromonadaceae	Alteromonas	Alteromonas genovensis	Mangrove: Sediment	uTitan(L):Qiagen	Alteromonas genovensis	339	0	339
sp1907	32.8543	7.96366	2.27907	3.49425	0.000475389	0.00670234	Bacteria	Bacteria_none	Proteobacteria	Gammaproteobacteria	Oceanospirillales	Oceanospirillaceae	Oceanobacter	Oceanobacter mangrovi	Mangrove: Sediment	uTitan(L):Qiagen	Oceanobacter mangrovi	329	0	329
sp1485	35.3718	7.92714	2.08302	3.8056	0.000141461	0.00337984	Bacteria	Bacteria_none	Cyanobacteria	Cyanobacteria_Incertae_sedis	Oscillatoriales	Sirenicapillariaceae	Limnospira	Limnospira fusiformis	Mangrove: Water	uTitan(L):uTitan(F)	Limnospira fusiformis	453	0	453
sp186	31.8344	7.91838	1.68258	4.70609	2.53E-06	9.55E-05	Bacteria	Bacteria_none	Proteobacteria	Alphaproteobacteria	Rhodospirillales	Thalassobaculaceae	Nisaea	Nisaea acidiphila	Mangrove: Sediment	uTitan(L):Qiagen	Nisaea acidiphila	354	0	354
sp1940	23.7678	7.89736	2.30007	3.43353	0.000595784	0.0216814	Bacteria	Bacteria_none	Bacteroidota	Bacteroidia	Bacteroidales	Bacteroidaceae	Bacteroides	Bacteroides coprosuis	Mangrove: Sediment	uTitan(L):uTitan(F)	Bacteroides coprosuis	176	0	176
sp1379	31.1431	7.87481	1.2476	6.31194	2.76E-10	1.62E-08	Bacteria	Bacteria_none	Proteobacteria	Gammaproteobacteria	Pseudomonadales	Pseudomonadaceae	Pseudomonas	Pseudomonas seleniipraecipitans	Mangrove: Water	uTitan(L):Qiagen	Pseudomonas seleniipraecipitans	368	0	368
sp2009	30.7558	7.86841	2.26743	3.47018	0.000520107	0.0070751	Bacteria	Bacteria_none	Proteobacteria	Gammaproteobacteria	Alteromonadales	Alteromonadaceae	Salinimonas	Salinimonas marina	Mangrove: Sediment	uTitan(L):Qiagen	Salinimonas marina	309	0	309
sp500	30.5889	7.86065	1.66118	4.73196	2.22E-06	8.80E-05	Bacteria	Bacteria_none	Proteobacteria	Gammaproteobacteria	Alteromonadales	Colwelliaceae	Colwellia	Colwellia asteriadis	Mangrove: Sediment	uTitan(L):Qiagen	Colwellia asteriadis	336	0	336
sp674	33.6562	7.85529	1.71659	4.5761	4.74E-06	0.000181484	Bacteria	Bacteria_none	Actinobacteria	Actinomycetia	Micrococcales	Micrococcaceae	Micrococcus	Micrococcus aloeverae	Mangrove: Water	uTitan(L):uTitan(F)	Micrococcus aloeverae	426	0	426
sp697	30.6675	7.85247	1.28597	6.10627	1.02E-09	5.65E-08	Bacteria	Bacteria_none	Proteobacteria	Gammaproteobacteria	Oceanospirillales	Endozoicomonadaceae	Endozoicomonas	Endozoicomonas elysicola	Mangrove: Water	uTitan(L):Qiagen	Endozoicomonas elysicola	361	0	361
sp1624	14.036	7.85059	2.78206	2.82186	0.00477461	0.0420984	Bacteria	Bacteria_none	Proteobacteria	Alphaproteobacteria	Rhodobacterales	Roseobacteraceae	Roseovarius	Roseovarius aquimarinus	Coral-W	uTitan(L):uTitan(F)	Roseovarius aquimarinus	39	0	39
sp1243	30.1781	7.84105	2.35755	3.32593	0.000881254	0.0104894	Bacteria	Bacteria_none	Proteobacteria	Epsilonproteobacteria	Campylobacterales	Arcobacteraceae	Arcobacter	Arcobacter nitrofigilis	Mangrove: Sediment	uTitan(L):Qiagen	Arcobacter nitrofigilis	300	0	300
sp770	33.0941	7.81489	1.99641	3.91447	9.06E-05	0.00227336	Bacteria	Bacteria_none	Cyanobacteria	Cyanobacteria_Incertae_sedis	Pseudanabaenales	Oculatellaceae	Komarkovaea	Komarkovaea angustata	Coral-W	uTitan(L):Qiagen	Komarkovaea angustata	217	0	217
sp774	29.1333	7.79132	1.58413	4.91837	8.73E-07	4.08E-05	Bacteria	Bacteria_none	Proteobacteria	Alphaproteobacteria	Rhodospirillales	Rhodospirillaceae	Hypericibacter	Hypericibacter terrae	Mangrove: Sediment	uTitan(L):Qiagen	Hypericibacter terrae	352	0	352
sp1928	28.9399	7.78108	2.19833	3.53955	0.000400815	0.0057893	Bacteria	Bacteria_none	Firmicutes	Clostridia	Thermoanaerobacterales	Thermoanaerobacteraceae	Calorimonas	Calorimonas adulescens	Mangrove: Sediment	uTitan(L):Qiagen	Calorimonas adulescens	325	0	325
sp1211	28.7128	7.7696	2.68768	2.89082	0.00384232	0.0303957	Bacteria	Bacteria_none	Proteobacteria	Gammaproteobacteria	Oceanospirillales	Oceanospirillaceae	Marinomonas	Marinomonas atlantica	Mangrove: Sediment	uTitan(L):Qiagen	Marinomonas atlantica	310	0	310
sp801	28.6189	7.76469	1.63747	4.74189	2.12E-06	8.51E-05	Bacteria	Bacteria_none	Proteobacteria	Alphaproteobacteria	Rhodospirillales	Rhodospirillaceae	Dongia	Dongia mobilis	Mangrove: Sediment	uTitan(L):Qiagen	Dongia mobilis	318	0	318
sp1995	28.5545	7.7614	2.78972	2.78215	0.00540009	0.0391088	Bacteria	Bacteria_none	Bacteroidota	Cytophagia	Cytophagales	Microscillaceae	Microscilla	Microscilla marina	Mangrove: Sediment	uTitan(L):Qiagen	Microscilla marina	283	0	283
sp1909	28.715	7.75712	1.3657	5.67997	1.35E-08	5.98E-07	Bacteria	Bacteria_none	Cyanobacteria	Cyanobacteria_Incertae_sedis	Oscillatoriales	Sirenicapillariaceae	Neolyngbya	Neolyngbya irregularis	Mangrove: Water	uTitan(L):Qiagen	Neolyngbya irregularis	332	0	332
sp2356	28.3976	7.75335	2.26026	3.43029	0.000602925	0.00786864	Bacteria	Bacteria_none	Firmicutes	Bacilli	Bacillales	Bacillaceae	Paenalkalicoccus	Paenalkalicoccus suaedae	Mangrove: Sediment	uTitan(L):Qiagen	Paenalkalicoccus suaedae	290	0	290
sp2210	28.0409	7.73534	2.73566	2.8276	0.00468987	0.0352563	Bacteria	Bacteria_none	Actinobacteria	Actinomycetia	Jiangellales	Jiangellaceae	Phytoactinopolyspora	Phytoactinopolyspora alkaliphila	Mangrove: Sediment	uTitan(L):Qiagen	Phytoactinopolyspora alkaliphila	291	0	291
sp2757	21.0382	7.72301	2.28881	3.37424	0.00074019	0.0257055	Bacteria	Bacteria_none	Proteobacteria	Gammaproteobacteria	Methylococcales	Methylococcaceae	Methyloparacoccus	Methyloparacoccus murrellii	Mangrove: Sediment	uTitan(L):uTitan(F)	Methyloparacoccus murrellii	191	0	191
sp1786	27.7985	7.72243	1.65539	4.66504	3.09E-06	0.000111735	Bacteria	Bacteria_none	Proteobacteria	Gammaproteobacteria	Pasteurellales	Pasteurellaceae	Haemophilus	Haemophilus parainfluenzae	Mangrove: Sediment	uTitan(L):Qiagen	Haemophilus parainfluenzae	302	0	302
sp862	27.0684	7.68391	1.65353	4.64696	3.37E-06	0.000120286	Bacteria	Bacteria_none	Proteobacteria	Gammaproteobacteria	Vibrionales	Vibrionaceae	Vibrio	Vibrio aestuarianus	Mangrove: Sediment	uTitan(L):Qiagen	Vibrio aestuarianus	291	0	291
sp632	30.1697	7.68135	2.04326	3.75937	0.000170342	0.00414245	Bacteria	Bacteria_none	Proteobacteria	Betaproteobacteria	Burkholderiales	Burkholderiaceae	Cupriavidus	Cupriavidus necator	Coral-W	uTitan(L):Qiagen	Cupriavidus necator	197	0	197
sp1143	26.9983	7.6807	1.72816	4.44445	8.81E-06	0.000279691	Bacteria	Bacteria_none	Cyanobacteria	Cyanobacteria_Incertae_sedis	Pseudanabaenales	Leptolyngbyaceae	Leptothoe	Leptothoe kymatousa	Mangrove: Sediment	uTitan(L):Qiagen	Leptothoe kymatousa	301	0	301
sp2397	26.5704	7.65756	2.70798	2.82777	0.00468728	0.0352563	Bacteria	Bacteria_none	Actinobacteria	Coriobacteriia	Coriobacteriales	Atopobiaceae	Paratractidigestivibacter	Paratractidigestivibacter faecalis	Mangrove: Sediment	uTitan(L):Qiagen	Paratractidigestivibacter faecalis	272	0	272
sp480	29.2212	7.63566	2.06092	3.70497	0.000211412	0.00476098	Bacteria	Bacteria_none	Proteobacteria	Alphaproteobacteria	Rhodobacterales	Rhodobacteraceae	Rhodovulum	Rhodovulum tesquicola	Coral-W	uTitan(L):Qiagen	Rhodovulum tesquicola	196	0	196
sp2132	26.2715	7.62955	1.7553	4.34657	1.38E-05	0.00024388	Bacteria	Bacteria_none	Proteobacteria	Alphaproteobacteria	Hyphomicrobiales	Devosiaceae	Pelagibacterium	Pelagibacterium sediminicola	Mangrove: Water	uTitan(L):Qiagen	Pelagibacterium sediminicola	321	0	321
sp1548	29.0376	7.62643	2.0625	3.69767	0.000217588	0.00476098	Bacteria	Bacteria_none	Bacteroidota	Cytophagia	Cytophagales	Hymenobacteraceae	Adhaeribacter	Adhaeribacter pallidiroseus	Coral-W	uTitan(L):Qiagen	Adhaeribacter pallidiroseus	193	0	193
sp1719	19.6995	7.62634	2.33316	3.26868	0.00108052	0.0347844	Bacteria	Bacteria_none	Cyanobacteria	Cyanobacteria_Incertae_sedis	Pseudanabaenales	Oculatellaceae	Oculatella	Oculatella neakameniensis	Mangrove: Sediment	uTitan(L):uTitan(F)	Oculatella neakameniensis	146	0	146
sp1500	25.9448	7.62349	1.59112	4.79128	1.66E-06	7.35E-05	Bacteria	Bacteria_none	Firmicutes	Bacilli	Bacillales	Thermoactinomycetaceae	Shimazuella	Shimazuella alba	Mangrove: Sediment	uTitan(L):Qiagen	Shimazuella alba	298	0	298
sp344	28.7228	7.6099	2.09268	3.63644	0.000276436	0.00558265	Bacteria	Bacteria_none	Proteobacteria	Gammaproteobacteria	Oceanospirillales	Oceanospirillaceae	Marinomonas	Marinomonas primoryensis	Coral-W	uTitan(L):Qiagen	Marinomonas primoryensis	180	0	180
sp2652	25.6009	7.60344	1.71579	4.43145	9.36E-06	0.000289943	Bacteria	Bacteria_none	Cyanobacteria	Cyanobacteria_Incertae_sedis	Nostocales	Nostocaceae	Nostoc	Nostoc indistinguendum	Mangrove: Sediment	uTitan(L):Qiagen	Nostoc indistinguendum	272	0	272
sp2490	25.5625	7.60178	2.72039	2.79437	0.00520014	0.0382339	Bacteria	Bacteria_none	Proteobacteria	Gammaproteobacteria	Thiotrichales	Piscirickettsiaceae	Hydrogenovibrio	Hydrogenovibrio halophilus	Mangrove: Sediment	uTitan(L):Qiagen	Hydrogenovibrio halophilus	263	0	263
sp1154	25.6887	7.59663	1.27543	5.95615	2.58E-09	1.39E-07	Bacteria	Bacteria_none	Proteobacteria	Alphaproteobacteria	Hyphomicrobiales	Phyllobacteriaceae	Pseudaminobacter	Pseudaminobacter soli	Mangrove: Water	uTitan(L):Qiagen	Pseudaminobacter soli	300	0	300
sp250	27.8694	7.58333	1.45729	5.20371	1.95E-07	1.03E-05	Bacteria	Bacteria_none	Proteobacteria	Deltaproteobacteria	Desulfobacterales	Desulfobacteraceae	Algorimarina	Algorimarina butyrica	Mangrove: Water	uTitan(L):uTitan(F)	Algorimarina butyrica	362	0	362
sp1379	28.1287	7.58048	2.07927	3.64575	0.000266615	0.00551893	Bacteria	Bacteria_none	Proteobacteria	Gammaproteobacteria	Pseudomonadales	Pseudomonadaceae	Pseudomonas	Pseudomonas seleniipraecipitans	Coral-W	uTitan(L):Qiagen	Pseudomonas seleniipraecipitans	186	0	186
sp1921	25.134	7.57674	1.84364	4.10966	3.96E-05	0.000957141	Bacteria	Bacteria_none	Proteobacteria	Alphaproteobacteria	Rhodobacterales	Rhodobacteraceae	Paracoccus	Paracoccus oceanense	Mangrove: Sediment	uTitan(L):Qiagen	Paracoccus oceanense	258	0	258
sp1772	24.8758	7.56238	2.22564	3.39785	0.000679171	0.00841917	Bacteria	Bacteria_none	Proteobacteria	Gammaproteobacteria	Chromatiales	Thioalkalibacteraceae	Guyparkeria	Guyparkeria hydrothermalis	Mangrove: Sediment	uTitan(L):Qiagen	Guyparkeria hydrothermalis	261	0	261
sp1572	24.6573	7.54987	2.2359	3.37666	0.000733721	0.00902582	Bacteria	Bacteria_none	Proteobacteria	Gammaproteobacteria	Chromatiales	Ectothiorhodospiraceae	Acidihalobacter	Acidihalobacter aeolianus	Mangrove: Sediment	uTitan(L):Qiagen	Acidihalobacter aeolianus	269	0	269
sp1128	24.6274	7.54756	1.69149	4.46208	8.12E-06	0.000264161	Bacteria	Bacteria_none	Proteobacteria	Gammaproteobacteria	Vibrionales	Vibrionaceae	Vibrio	Vibrio aerogenes	Mangrove: Sediment	uTitan(L):Qiagen	Vibrio aerogenes	264	0	264
sp649	24.7652	7.54358	1.30876	5.76393	8.22E-09	3.89E-07	Bacteria	Bacteria_none	Proteobacteria	Gammaproteobacteria	Oceanospirillales	Oceanospirillaceae	Marinomonas	Marinomonas polaris	Mangrove: Water	uTitan(L):Qiagen	Marinomonas polaris	287	0	287
sp989	27.0195	7.53869	1.46429	5.14835	2.63E-07	1.36E-05	Bacteria	Bacteria_none	Proteobacteria	Alphaproteobacteria	Rickettsiales	Anaplasmataceae	Ehrlichia	Ehrlichia ruminantium	Mangrove: Water	uTitan(L):uTitan(F)	Ehrlichia ruminantium	352	0	352
sp1502	24.3437	7.53099	1.69183	4.45139	8.53E-06	0.00027419	Bacteria	Bacteria_none	Proteobacteria	Alphaproteobacteria	Rhodospirillales	Acetobacteraceae	Roseomonas	Roseomonas aestuarii	Mangrove: Sediment	uTitan(L):Qiagen	Roseomonas aestuarii	265	0	265
sp3202	18.348	7.52578	2.27514	3.30783	0.000940202	0.0311663	Bacteria	Bacteria_none	Firmicutes	Clostridia	Eubacteriales	Lachnospiraceae	Frisingicoccus	Frisingicoccus caecimuris	Mangrove: Sediment	uTitan(L):uTitan(F)	Frisingicoccus caecimuris	168	0	168
sp1079	24.1435	7.51886	1.67586	4.48658	7.24E-06	0.000241656	Bacteria	Bacteria_none	Proteobacteria	Gammaproteobacteria	Vibrionales	Vibrionaceae	Vibrio	Vibrio gangliei	Mangrove: Sediment	uTitan(L):Qiagen	Vibrio gangliei	259	0	259
sp1684	24.0892	7.51576	1.6296	4.61203	3.99E-06	0.000138538	Bacteria	Bacteria_none	Proteobacteria	Gammaproteobacteria	Oceanospirillales	Oceanospirillaceae	Nitrincola	Nitrincola alkalisediminis	Mangrove: Sediment	uTitan(L):Qiagen	Nitrincola alkalisediminis	263	0	263
sp2289	18.1729	7.51196	2.30401	3.26039	0.0011126	0.0354761	Bacteria	Bacteria_none	Proteobacteria	Deltaproteobacteria	Desulfobacterales	Desulfobacteraceae	Desulfoconvexum	Desulfoconvexum algidum	Mangrove: Sediment	uTitan(L):uTitan(F)	Desulfoconvexum algidum	167	0	167
sp1123	25.6836	7.44921	2.13052	3.49643	0.000471534	0.00887342	Bacteria	Bacteria_none	Cyanobacteria	Cyanobacteria_Incertae_sedis	Oscillatoriales	Oscillatoriales_Incertae_sedis	Ammassolinea	Ammassolinea attenuata	Coral-W	uTitan(L):Qiagen	Ammassolinea attenuata	169	0	169
sp1059	22.9624	7.4479	2.70644	2.75192	0.00592474	0.0420788	Bacteria	Bacteria_none	Chloroflexi	Chloroflexia	Chloroflexales	Chloroflexaceae	Chloroflexus	Chloroflexus aggregans	Mangrove: Sediment	uTitan(L):Qiagen	Chloroflexus aggregans	307	0	307
sp690	23.1664	7.44721	1.31142	5.67874	1.36E-08	5.98E-07	Bacteria	Bacteria_none	Proteobacteria	Gammaproteobacteria	Alteromonadales	Pseudoalteromonadaceae	Pseudoalteromonas	Pseudoalteromonas phenolica	Mangrove: Water	uTitan(L):Qiagen	Pseudoalteromonas phenolica	268	0	268
sp2187	22.829	7.43906	2.23299	3.33143	0.000864003	0.0103319	Bacteria	Bacteria_none	Proteobacteria	Alphaproteobacteria	Sphingomonadales	Erythrobacteraceae	Qipengyuania	Qipengyuania pelagi	Mangrove: Sediment	uTitan(L):Qiagen	Qipengyuania pelagi	268	0	268
sp1990	22.8033	7.43665	2.26966	3.27654	0.00105086	0.0120422	Bacteria	Bacteria_none	Proteobacteria	Alphaproteobacteria	Kordiimonadales	Kordiimonadaceae	Kordiimonas	Kordiimonas aquimaris	Mangrove: Sediment	uTitan(L):Qiagen	Kordiimonas aquimaris	231	0	231
sp2123	22.6301	7.42666	2.24316	3.31081	0.000930276	0.0108715	Bacteria	Bacteria_none	Planctomycetota	Planctomycetia	Gemmatales	Gemmataceae	Tuwongella	Tuwongella immobilis	Mangrove: Sediment	uTitan(L):Qiagen	Tuwongella immobilis	273	0	273
sp491	24.9372	7.42299	1.50186	4.94252	7.71E-07	3.73E-05	Bacteria	Bacteria_none	Proteobacteria	Alphaproteobacteria	Hyphomicrobiales	Rhizobiaceae	Rhizobium	Rhizobium arsenicireducens	Mangrove: Water	uTitan(L):uTitan(F)	Rhizobium arsenicireducens	325	0	325
sp1711	22.5162	7.4184	2.34336	3.16572	0.001547	0.0163006	Bacteria	Bacteria_none	Proteobacteria	Gammaproteobacteria	Alteromonadales	Alteromonadaceae	Glaciecola	Glaciecola nitratireducens	Mangrove: Sediment	uTitan(L):Qiagen	Glaciecola nitratireducens	229	0	229
sp808	25.0207	7.41134	2.14731	3.45146	0.000557572	0.0102593	Bacteria	Bacteria_none	Proteobacteria	Gammaproteobacteria	Oceanospirillales	Oceanospirillaceae	Marinomonas	Marinomonas epiphytica	Coral-W	uTitan(L):Qiagen	Marinomonas epiphytica	163	0	163
sp1122	22.396	7.41093	2.74281	2.70195	0.00689334	0.0472607	Bacteria	Bacteria_none	Proteobacteria	Epsilonproteobacteria	Campylobacterales	Sulfurovaceae	Sulfurovum	Sulfurovum lithotrophicum	Mangrove: Sediment	uTitan(L):Qiagen	Sulfurovum lithotrophicum	231	0	231
sp164	24.4455	7.39408	1.47897	4.99946	5.75E-07	2.84E-05	Bacteria	Bacteria_none	Bacteroidota	Cytophagia	Cytophagales	Roseivirgaceae	Roseivirga	Roseivirga spongicola	Mangrove: Water	uTitan(L):uTitan(F)	Roseivirga spongicola	315	0	315
sp1423	22.0744	7.38953	1.74907	4.22482	2.39E-05	0.00065404	Bacteria	Bacteria_none	Firmicutes	Bacilli	Lactobacillales	Lactobacillaceae	Oenococcus	Oenococcus alcoholitolerans	Mangrove: Sediment	uTitan(L):Qiagen	Oenococcus alcoholitolerans	235	0	235
sp1254	22.1648	7.38354	1.33533	5.52937	3.21E-08	1.36E-06	Bacteria	Bacteria_none	Proteobacteria	Gammaproteobacteria	Alteromonadales	Alteromonadaceae	Alteromonas	Alteromonas gracilis	Mangrove: Water	uTitan(L):Qiagen	Alteromonas gracilis	257	0	257
sp1411	21.9077	7.37869	1.72583	4.27545	1.91E-05	0.000557299	Bacteria	Bacteria_none	Proteobacteria	Gammaproteobacteria	Oceanospirillales	Halomonadaceae	Halomonas	Halomonas alkalicola	Mangrove: Sediment	uTitan(L):Qiagen	Halomonas alkalicola	235	0	235
sp2729	21.6757	7.36374	2.35375	3.12851	0.00175695	0.017645	Bacteria	Bacteria_none	Actinobacteria	Actinomycetia	Actinomycetales	Actinomycetaceae	Peptidiphaga	Peptidiphaga gingivicola	Mangrove: Sediment	uTitan(L):Qiagen	Peptidiphaga gingivicola	228	0	228
sp2797	21.6511	7.36194	1.83158	4.01945	5.83E-05	0.00132722	Bacteria	Bacteria_none	Actinobacteria	Actinomycetia	Corynebacteriales	Gordoniaceae	Gordonia	Gordonia lacunae	Mangrove: Sediment	uTitan(L):Qiagen	Gordonia lacunae	234	0	234
sp2982	16.3568	7.35881	2.29531	3.20602	0.00134583	0.0417207	Bacteria	Bacteria_none	Proteobacteria	Alphaproteobacteria	Maricaulales	Maricaulaceae	Maricaulis	Maricaulis washingtonensis	Mangrove: Sediment	uTitan(L):uTitan(F)	Maricaulis washingtonensis	134	0	134
sp1601	21.573	7.35672	1.72515	4.26439	2.00E-05	0.000577275	Bacteria	Bacteria_none	Proteobacteria	Alphaproteobacteria	Rhodobacterales	Rhodobacteraceae	Paracoccus	Paracoccus koreensis	Mangrove: Sediment	uTitan(L):Qiagen	Paracoccus koreensis	236	0	236
sp1310	21.5766	7.35667	1.69032	4.35225	1.35E-05	0.00040758	Bacteria	Bacteria_none	Proteobacteria	Gammaproteobacteria	Vibrionales	Vibrionaceae	Vibrio	Vibrio proteolyticus	Mangrove: Sediment	uTitan(L):Qiagen	Vibrio proteolyticus	233	0	233
sp2015	21.1144	7.32539	1.74319	4.2023	2.64E-05	0.000707613	Bacteria	Bacteria_none	Proteobacteria	Alphaproteobacteria	Rhodospirillales	Acetobacteraceae	Humitalea	Humitalea rosea	Mangrove: Sediment	uTitan(L):Qiagen	Humitalea rosea	225	0	225
sp853	20.9697	7.31594	2.22022	3.29514	0.00098373	0.0113927	Bacteria	Bacteria_none	Bacteroidota	Cytophagia	Cytophagales	Spirosomaceae	Ravibacter	Ravibacter arvi	Mangrove: Sediment	uTitan(L):Qiagen	Ravibacter arvi	226	0	226
sp2480	20.9653	7.31559	2.31529	3.15968	0.00157942	0.0165332	Bacteria	Bacteria_none	Firmicutes	Clostridia	Eubacteriales	Peptococcaceae	Desulfitibacter	Desulfitibacter alkalitolerans	Mangrove: Sediment	uTitan(L):Qiagen	Desulfitibacter alkalitolerans	219	0	219
sp1971	21.1228	7.31421	1.33163	5.49268	3.96E-08	1.63E-06	Bacteria	Bacteria_none	Proteobacteria	Gammaproteobacteria	Alteromonadales	Alteromonadaceae	Aliiglaciecola	Aliiglaciecola aliphaticivorans	Mangrove: Water	uTitan(L):Qiagen	Aliiglaciecola aliphaticivorans	246	0	246
sp2457	20.917	7.31326	2.71333	2.69531	0.00703237	0.0478313	Bacteria	Bacteria_none	Proteobacteria	Alphaproteobacteria	Hyphomicrobiales	Hyphomicrobiaceae	Rhodomicrobium	Rhodomicrobium lacus	Mangrove: Sediment	uTitan(L):Qiagen	Rhodomicrobium lacus	272	0	272
sp1868	22.7096	7.28772	1.60442	4.54228	5.56E-06	0.000209581	Bacteria	Bacteria_none	Proteobacteria	Alphaproteobacteria	Hyphomicrobiales	Devosiaceae	Pelagibacterium	Pelagibacterium luteolum	Mangrove: Water	uTitan(L):uTitan(F)	Pelagibacterium luteolum	290	0	290
sp1221	20.5223	7.28472	1.7443	4.1763	2.96E-05	0.000771297	Bacteria	Bacteria_none	Proteobacteria	Gammaproteobacteria	Alteromonadales	Alteromonadaceae	Marinifaba	Marinifaba aquimaris	Mangrove: Sediment	uTitan(L):Qiagen	Marinifaba aquimaris	225	0	225
sp1279	22.2104	7.25561	1.51264	4.79667	1.61E-06	7.47E-05	Bacteria	Bacteria_none	Proteobacteria	Alphaproteobacteria	Rickettsiales	Anaplasmataceae	Ehrlichia	Ehrlichia minasensis	Mangrove: Water	uTitan(L):uTitan(F)	Ehrlichia minasensis	284	0	284
sp406	22.2044	7.25553	1.50368	4.82518	1.40E-06	6.61E-05	Bacteria	Bacteria_none	Proteobacteria	Deltaproteobacteria	Myxococcales	Polyangiaceae	Racemicystis	Racemicystis crocea	Mangrove: Water	uTitan(L):uTitan(F)	Racemicystis crocea	289	0	289
sp1764	20.0546	7.25132	1.76498	4.10844	3.98E-05	0.000957141	Bacteria	Bacteria_none	Balneolaeota	Balneolia	Balneolales	Soortiaceae	Soortia	Soortia roseihalophila	Mangrove: Sediment	uTitan(L):Qiagen	Soortia roseihalophila	218	0	218
sp1455	20.1413	7.24518	1.35153	5.36074	8.29E-08	3.22E-06	Bacteria	Bacteria_none	Actinobacteria	Actinomycetia	Streptomycetales	Streptomycetaceae	Streptomyces	Streptomyces camponoti	Mangrove: Water	uTitan(L):Qiagen	Streptomyces camponoti	232	0	232
sp1003	20.1281	7.24414	1.36336	5.31345	1.08E-07	3.94E-06	Bacteria	Bacteria_none	Cyanobacteria	Cyanobacteria_Incertae_sedis	Oscillatoriales	Oscillatoriaceae	Tenebriella	Tenebriella curviceps	Mangrove: Water	uTitan(L):Qiagen	Tenebriella curviceps	231	0	231
sp2774	15.0203	7.2369	1.93066	3.7484	0.000177968	0.00744795	Bacteria	Bacteria_none	Proteobacteria	Gammaproteobacteria	Chromatiales	Chromatiaceae	Marichromatium	Marichromatium indicum	Mangrove: Sediment	uTitan(L):uTitan(F)	Marichromatium indicum	133	0	133
sp864	19.8464	7.23685	1.77759	4.07115	4.68E-05	0.00110345	Bacteria	Bacteria_none	Proteobacteria	Gammaproteobacteria	Thiotrichales	Fastidiosibacteraceae	Caedibacter	Caedibacter taeniospiralis	Mangrove: Sediment	uTitan(L):Qiagen	Caedibacter taeniospiralis	225	0	225
sp1296	22.1562	7.23619	2.22108	3.25796	0.00112216	0.0178682	Bacteria	Bacteria_none	Proteobacteria	Gammaproteobacteria	Pseudomonadales	Pseudomonadaceae	Entomomonas	Entomomonas moraniae	Coral-W	uTitan(L):Qiagen	Entomomonas moraniae	147	0	147
sp1796	19.655	7.21016	1.34798	5.34885	8.85E-08	3.37E-06	Bacteria	Bacteria_none	Proteobacteria	Gammaproteobacteria	Vibrionales	Vibrionaceae	Vibrio	Vibrio fortis	Mangrove: Water	uTitan(L):Qiagen	Vibrio fortis	228	0	228
sp1254	21.7367	7.20899	2.24136	3.21635	0.00129834	0.0201314	Bacteria	Bacteria_none	Proteobacteria	Gammaproteobacteria	Alteromonadales	Alteromonadaceae	Alteromonas	Alteromonas gracilis	Coral-W	uTitan(L):Qiagen	Alteromonas gracilis	148	0	148
sp1575	21.4378	7.20477	1.53786	4.68493	2.80E-06	0.000117411	Bacteria	Bacteria_none	Cyanobacteria	Cyanobacteria_Incertae_sedis	Oscillatoriales	Sirenicapillariaceae	Capilliphycus	Capilliphycus guerandensis	Mangrove: Water	uTitan(L):uTitan(F)	Capilliphycus guerandensis	278	0	278
sp1760	21.4231	7.20363	1.54571	4.66039	3.16E-06	0.00012987	Bacteria	Bacteria_none	Proteobacteria	Gammaproteobacteria	Gammaproteobacteria_Incertae_sedis	Gammaproteobacteria_Incertae_sedis_Incertae_sedis	Wohlfahrtiimonas	Wohlfahrtiimonas chitiniclastica	Mangrove: Water	uTitan(L):uTitan(F)	Wohlfahrtiimonas chitiniclastica	275	0	275
sp2746	19.3895	7.20283	1.72492	4.17576	2.97E-05	0.000771297	Bacteria	Bacteria_none	Cyanobacteria	Cyanobacteria_Incertae_sedis	Nostocales	Nostocales_Incertae_sedis	Constrictifilum	Constrictifilum karadense	Mangrove: Sediment	uTitan(L):Qiagen	Constrictifilum karadense	214	0	214
sp447	21.3299	7.19745	1.51166	4.76128	1.92E-06	8.55E-05	Bacteria	Bacteria_none	Proteobacteria	Alphaproteobacteria	Rhodospirillales	Rhodospirillaceae	Caenispirillum	Caenispirillum salinarum	Mangrove: Water	uTitan(L):uTitan(F)	Caenispirillum salinarum	276	0	276
sp268	21.5417	7.19562	2.23943	3.21314	0.00131291	0.0201314	Bacteria	Bacteria_none	Verrucomicrobia	Opitutae	Puniceicoccales	Puniceicoccaceae	Cerasicoccus	Cerasicoccus frondis	Coral-W	uTitan(L):Qiagen	Cerasicoccus frondis	143	0	143
sp2895	19.2857	7.19555	1.6558	4.34567	1.39E-05	0.000415093	Bacteria	Bacteria_none	Proteobacteria	Deltaproteobacteria	Desulfuromonadales	Geobacteraceae	Geobacter	Geobacter grbiciae	Mangrove: Sediment	uTitan(L):Qiagen	Geobacter grbiciae	222	0	222
sp1372	19.216	7.19047	1.80211	3.99003	6.61E-05	0.00146116	Bacteria	Bacteria_none	Bacteroidota	Flavobacteriia	Flavobacteriales	Flavobacteriaceae	Pseudotenacibaculum	Pseudotenacibaculum haliotis	Mangrove: Sediment	uTitan(L):Qiagen	Pseudotenacibaculum haliotis	222	0	222
sp1156	21.2009	7.18874	1.52358	4.71833	2.38E-06	0.000103601	Bacteria	Bacteria_none	Fibrobacteres	Chitinivibrionia	Chitinivibrionales	Chitinivibrionaceae	Chitinivibrio	Chitinivibrio alkaliphilus	Mangrove: Water	uTitan(L):uTitan(F)	Chitinivibrio alkaliphilus	275	0	275
sp1778	19.1977	7.1764	1.3496	5.31741	1.05E-07	3.93E-06	Bacteria	Bacteria_none	Cyanobacteria	Cyanobacteria_Incertae_sedis	Synechococcales	Synechococcales_Incertae_sedis	Aegeococcus	Aegeococcus anagnostidisi	Mangrove: Water	uTitan(L):Qiagen	Aegeococcus anagnostidisi	224	0	224
sp2571	18.9477	7.1696	2.33849	3.06591	0.00217008	0.0205877	Bacteria	Bacteria_none	Proteobacteria	Deltaproteobacteria	Syntrophobacterales	Syntrophobacteraceae	Syntrophobacterium	Syntrophobacterium sulfatireducens	Mangrove: Sediment	uTitan(L):Qiagen	Syntrophobacterium sulfatireducens	199	0	199
sp3338	14.337	7.16893	1.89633	3.78042	0.000156563	0.00663512	Bacteria	Bacteria_none	Actinobacteria	Actinomycetia	Streptomycetales	Streptomycetaceae	Streptomyces	Streptomyces anulatus	Mangrove: Sediment	uTitan(L):uTitan(F)	Streptomyces anulatus	122	0	122
sp2757	18.3824	7.12575	2.30648	3.08944	0.00200533	0.0193604	Bacteria	Bacteria_none	Proteobacteria	Gammaproteobacteria	Methylococcales	Methylococcaceae	Methyloparacoccus	Methyloparacoccus murrellii	Mangrove: Sediment	uTitan(L):Qiagen	Methyloparacoccus murrellii	191	0	191
sp1423	18.5315	7.12574	1.38414	5.14813	2.63E-07	8.80E-06	Bacteria	Bacteria_none	Firmicutes	Bacilli	Lactobacillales	Lactobacillaceae	Oenococcus	Oenococcus alcoholitolerans	Mangrove: Water	uTitan(L):Qiagen	Oenococcus alcoholitolerans	218	0	218
sp1474	20.5232	7.1254	2.2746	3.1326	0.00173268	0.0256189	Bacteria	Bacteria_none	Proteobacteria	Alphaproteobacteria	Rhodobacterales	Roseobacteraceae	Tateyamaria	Tateyamaria pelophila	Coral-W	uTitan(L):Qiagen	Tateyamaria pelophila	133	0	133
sp719	18.4215	7.11719	1.37582	5.17305	2.30E-07	7.84E-06	Bacteria	Bacteria_none	Firmicutes	Clostridia	Thermoanaerobacterales	Thermodesulfobiaceae	Thermodesulfobium	Thermodesulfobium narugense	Mangrove: Water	uTitan(L):Qiagen	Thermodesulfobium narugense	217	0	217
sp2138	18.3317	7.10935	1.38587	5.12987	2.90E-07	9.22E-06	Bacteria	Bacteria_none	Proteobacteria	Gammaproteobacteria	Oceanospirillales	Alcanivoracaceae	Alcanivorax	Alcanivorax balearicus	Mangrove: Water	uTitan(L):Qiagen	Alcanivorax balearicus	211	0	211
sp2402	18.0918	7.10336	1.80402	3.93752	8.23E-05	0.00170695	Bacteria	Bacteria_none	Actinobacteria	Actinomycetia	Corynebacteriales	Segniliparaceae	Segniliparus	Segniliparus rugosus	Mangrove: Sediment	uTitan(L):Qiagen	Segniliparus rugosus	206	0	206
sp1549	19.9469	7.10066	1.53074	4.63871	3.51E-06	0.000141637	Bacteria	Bacteria_none	Proteobacteria	Alphaproteobacteria	Hyphomicrobiales	Methylocystaceae	Methylocystis	Methylocystis heyeri	Mangrove: Water	uTitan(L):uTitan(F)	Methylocystis heyeri	257	0	257
sp2854	18.0618	7.10047	2.28526	3.10707	0.00188953	0.0184014	Bacteria	Bacteria_none	Actinobacteria	Coriobacteriia	Eggerthellales	Eggerthellaceae	Gordonibacter	Gordonibacter massiliensis	Mangrove: Sediment	uTitan(L):Qiagen	Gordonibacter massiliensis	190	0	190
sp1015	18.0467	7.09986	1.68696	4.20868	2.57E-05	0.000695158	Bacteria	Bacteria_none	Proteobacteria	Gammaproteobacteria	Vibrionales	Vibrionaceae	Vibrio	Vibrio harveyi	Mangrove: Sediment	uTitan(L):Qiagen	Vibrio harveyi	208	0	208
sp1856	17.9317	7.08992	1.67434	4.23445	2.29E-05	0.000633396	Bacteria	Bacteria_none	Proteobacteria	Gammaproteobacteria	Alteromonadales	Idiomarinaceae	Aliidiomarina	Aliidiomarina minuta	Mangrove: Sediment	uTitan(L):Qiagen	Aliidiomarina minuta	199	0	199
sp1924	18.0582	7.08867	1.38151	5.13111	2.88E-07	9.22E-06	Bacteria	Bacteria_none	Tenericutes	Mollicutes	Mycoplasmatales	Mycoplasmataceae	Mesomycoplasma	Mesomycoplasma mobile	Mangrove: Water	uTitan(L):Qiagen	Mesomycoplasma mobile	214	0	214
sp25	17.9049	7.0877	1.78497	3.97077	7.16E-05	0.00153659	Bacteria	Bacteria_none	Proteobacteria	Alphaproteobacteria	Rhodobacterales	Roseobacteraceae	Roseovarius	Roseovarius arcticus	Mangrove: Sediment	uTitan(L):Qiagen	Roseovarius arcticus	195	0	195
sp2429	17.8058	7.08001	2.2419	3.15803	0.00158837	0.0165332	Bacteria	Bacteria_none	Firmicutes	Clostridia	Eubacteriales	Eubacteriales Family XIII. Incertae Sedis	Ihubacter	Ihubacter massiliensis	Mangrove: Sediment	uTitan(L):Qiagen	Ihubacter massiliensis	192	0	192
sp1837	17.8418	7.07038	1.38986	5.0871	3.64E-07	1.10E-05	Bacteria	Bacteria_none	Proteobacteria	Gammaproteobacteria	Orbales	Orbaceae	Gilliamella	Gilliamella apicola	Mangrove: Water	uTitan(L):Qiagen	Gilliamella apicola	206	0	206
sp692	19.4456	7.06412	1.52887	4.6205	3.83E-06	0.000151899	Bacteria	Bacteria_none	Bacteroidota	Flavobacteriia	Flavobacteriales	Flavobacteriaceae	Lutibacter	Lutibacter holmesii	Mangrove: Water	uTitan(L):uTitan(F)	Lutibacter holmesii	253	0	253
sp1726	17.5879	7.06191	1.70345	4.14566	3.39E-05	0.00085406	Bacteria	Bacteria_none	Proteobacteria	Alphaproteobacteria	Hyphomicrobiales	Nitrobacteraceae	Bradyrhizobium	Bradyrhizobium retamae	Mangrove: Sediment	uTitan(L):Qiagen	Bradyrhizobium retamae	193	0	193
sp1802	17.626	7.05358	1.37106	5.14464	2.68E-07	8.81E-06	Bacteria	Bacteria_none	Acidobacteria	Acidobacteriia	Acidobacteriales	Acidobacteriaceae	Acidicapsa	Acidicapsa acidiphila	Mangrove: Water	uTitan(L):Qiagen	Acidicapsa acidiphila	208	0	208
sp2813	17.4522	7.05105	2.30383	3.06057	0.00220913	0.0206533	Bacteria	Bacteria_none	Bacteroidota	Bacteroidia	Bacteroidales	Rikenellaceae	Alistipes	Alistipes provencensis	Mangrove: Sediment	uTitan(L):Qiagen	Alistipes provencensis	188	0	188
sp1742	17.4116	7.04743	1.74442	4.03999	5.35E-05	0.00123812	Bacteria	Bacteria_none	Firmicutes	Bacilli	Bacillales	Bacillaceae	Bacillus	Bacillus smithii	Mangrove: Sediment	uTitan(L):Qiagen	Bacillus smithii	192	0	192
sp2660	17.5267	7.04417	1.5182	4.63983	3.49E-06	7.96E-05	Bacteria	Bacteria_none	Proteobacteria	Gammaproteobacteria	Moraxellales	Moraxellaceae	Acinetobacter	Acinetobacter indicus	Mangrove: Water	uTitan(L):Qiagen	Acinetobacter indicus	197	0	197
sp311	13.0684	7.03566	1.92764	3.64988	0.000262367	0.0104572	Bacteria	Bacteria_none	Bacteroidota	Flavobacteriia	Flavobacteriales	Flavobacteriaceae	Flavobacterium	Flavobacterium laiguense	Mangrove: Sediment	uTitan(L):uTitan(F)	Flavobacterium laiguense	113	0	113
sp2698	17.2167	7.03122	2.25246	3.12157	0.00179889	0.0179261	Bacteria	Bacteria_none	Proteobacteria	Gammaproteobacteria	Oceanospirillales	Oleiphilaceae	Oleiphilus	Oleiphilus messinensis	Mangrove: Sediment	uTitan(L):Qiagen	Oleiphilus messinensis	180	0	180
sp934	17.3152	7.02748	1.3794	5.09459	3.49E-07	1.09E-05	Bacteria	Bacteria_none	Cyanobacteria	Cyanobacteria_Incertae_sedis	Oscillatoriales	Coleofasciculaceae	Coleofasciculus	Coleofasciculus chthonoplastes	Mangrove: Water	uTitan(L):Qiagen	Coleofasciculus chthonoplastes	202	0	202
sp1771	17.0619	7.01813	2.26127	3.10363	0.00191165	0.0185466	Bacteria	Bacteria_none	Firmicutes	Clostridia	Eubacteriales	Clostridiales Family XVII. Incertae Sedis	Thermaerobacter	Thermaerobacter subterraneus	Mangrove: Sediment	uTitan(L):Qiagen	Thermaerobacter subterraneus	177	0	177
sp419	19.0469	7.01811	2.32435	3.01938	0.00253291	0.0361594	Bacteria	Bacteria_none	Verrucomicrobia	Opitutae	Puniceicoccales	Puniceicoccaceae	Pelagicoccus	Pelagicoccus croceus	Coral-W	uTitan(L):Qiagen	Pelagicoccus croceus	127	0	127
sp2211	16.9491	7.00873	2.28703	3.06456	0.00217991	0.020605	Bacteria	Bacteria_none	Proteobacteria	Gammaproteobacteria	Pseudomonadales	Marinobacteraceae	Marinobacter	Marinobacter salinexigens	Mangrove: Sediment	uTitan(L):Qiagen	Marinobacter salinexigens	180	0	180
sp2836	16.9397	7.00784	1.76497	3.97051	7.17E-05	0.00153659	Bacteria	Bacteria_none	Firmicutes	Bacilli	Bacillales	Thermoactinomycetaceae	Novibacillus	Novibacillus thermophilus	Mangrove: Sediment	uTitan(L):Qiagen	Novibacillus thermophilus	186	0	186
sp2983	16.8721	7.00328	1.74492	4.01353	5.98E-05	0.00134907	Bacteria	Bacteria_none	Firmicutes	Clostridia	Halanaerobiales	Halanaerobiaceae	Halanaerobium	Halanaerobium lacusrosei	Mangrove: Sediment	uTitan(L):Qiagen	Halanaerobium lacusrosei	203	0	203
sp305	16.8749	7.00231	2.30611	3.03641	0.00239412	0.0217943	Bacteria	Bacteria_none	Proteobacteria	Gammaproteobacteria	Chromatiales	Granulosicoccaceae	Sulfuriflexus	Sulfuriflexus mobilis	Mangrove: Sediment	uTitan(L):Qiagen	Sulfuriflexus mobilis	177	0	177
sp688	18.8251	7.00138	2.33583	2.99738	0.0027231	0.0382157	Bacteria	Bacteria_none	Proteobacteria	Alphaproteobacteria	Hyphomicrobiales	Devosiaceae	Pelagibacterium	Pelagibacterium lentulum	Coral-W	uTitan(L):Qiagen	Pelagibacterium lentulum	127	0	127
sp686	16.9909	7.00018	1.38752	5.04511	4.53E-07	1.31E-05	Bacteria	Bacteria_none	Proteobacteria	Gammaproteobacteria	Alteromonadales	Alteromonadaceae	Paraneptunicella	Paraneptunicella aestuarii	Mangrove: Water	uTitan(L):Qiagen	Paraneptunicella aestuarii	198	0	198
sp3113	18.6033	6.98445	2.34972	2.97246	0.00295427	0.0394619	Bacteria	Bacteria_none	Bacteroidota	Bacteroidia	Bacteroidales	Prevotellaceae	Prevotella	Prevotella ihumii	Coral-W	uTitan(L):Qiagen	Prevotella ihumii	127	0	127
sp438	18.4299	6.97129	2.37828	2.93123	0.00337628	0.0432243	Bacteria	Bacteria_none	Cyanobacteria	Cyanobacteria_Incertae_sedis	Nostocales	Calotrichaceae	Dulcicalothrix	Dulcicalothrix necridiiformans	Coral-W	uTitan(L):Qiagen	Dulcicalothrix necridiiformans	129	0	129
sp273	18.4083	6.96881	2.3484	2.96748	0.00300254	0.0394619	Bacteria	Bacteria_none	Verrucomicrobia	Verrucomicrobiae	Verrucomicrobiales	Verrucomicrobia subdivision 3	Limisphaera	Limisphaera ngatamarikiensis	Coral-W	uTitan(L):Qiagen	Limisphaera ngatamarikiensis	122	0	122
sp1455	18.1677	6.9657	1.55526	4.47879	7.51E-06	0.000277994	Bacteria	Bacteria_none	Actinobacteria	Actinomycetia	Streptomycetales	Streptomycetaceae	Streptomyces	Streptomyces camponoti	Mangrove: Water	uTitan(L):uTitan(F)	Streptomyces camponoti	232	0	232
sp1003	18.1171	6.96165	1.56662	4.44373	8.84E-06	0.000311831	Bacteria	Bacteria_none	Cyanobacteria	Cyanobacteria_Incertae_sedis	Oscillatoriales	Oscillatoriaceae	Tenebriella	Tenebriella curviceps	Mangrove: Water	uTitan(L):uTitan(F)	Tenebriella curviceps	231	0	231
sp707	16.3689	6.95873	2.2969	3.02961	0.00244868	0.0220897	Bacteria	Bacteria_none	Proteobacteria	Gammaproteobacteria	Alteromonadales	Pseudoalteromonadaceae	Psychrosphaera	Psychrosphaera ytuae	Mangrove: Sediment	uTitan(L):Qiagen	Psychrosphaera ytuae	180	0	180
sp2052	16.3221	6.95455	1.68534	4.12651	3.68E-05	0.000910514	Bacteria	Bacteria_none	Firmicutes	Erysipelotrichia	Erysipelotrichales	Erysipelotrichaceae	Erysipelothrix	Erysipelothrix piscisicarius	Mangrove: Sediment	uTitan(L):Qiagen	Erysipelothrix piscisicarius	184	0	184
sp2096	16.3774	6.94697	1.40397	4.9481	7.49E-07	2.05E-05	Bacteria	Bacteria_none	Proteobacteria	Gammaproteobacteria	Vibrionales	Vibrionaceae	Grimontia	Grimontia marina	Mangrove: Water	uTitan(L):Qiagen	Grimontia marina	190	0	190
sp3202	16.234	6.94631	2.28813	3.0358	0.00239899	0.0217943	Bacteria	Bacteria_none	Firmicutes	Clostridia	Eubacteriales	Lachnospiraceae	Frisingicoccus	Frisingicoccus caecimuris	Mangrove: Sediment	uTitan(L):Qiagen	Frisingicoccus caecimuris	168	0	168
sp2580	16.1236	6.93641	1.73438	3.99937	6.35E-05	0.00141988	Bacteria	Bacteria_none	Firmicutes	Clostridia	Eubacteriales	Peptostreptococcaceae	Tepidibacter	Tepidibacter formicigenes	Mangrove: Sediment	uTitan(L):Qiagen	Tepidibacter formicigenes	176	0	176
sp1796	17.718	6.92968	1.54961	4.47187	7.75E-06	0.000282437	Bacteria	Bacteria_none	Proteobacteria	Gammaproteobacteria	Vibrionales	Vibrionaceae	Vibrio	Vibrio fortis	Mangrove: Water	uTitan(L):uTitan(F)	Vibrio fortis	228	0	228
sp1747	16.0228	6.92703	1.84016	3.76436	0.000166977	0.00308848	Bacteria	Bacteria_none	Proteobacteria	Gammaproteobacteria	Oceanospirillales	Pleioneaceae	Aliikangiella	Aliikangiella marina	Mangrove: Sediment	uTitan(L):Qiagen	Aliikangiella marina	170	0	170
sp1387	17.8792	6.92693	2.37204	2.92024	0.00349762	0.0432243	Bacteria	Bacteria_none	Firmicutes	Bacilli	Bacillales	Bacillaceae	Bacillus	Bacillus daqingensis	Coral-W	uTitan(L):Qiagen	Bacillus daqingensis	120	0	120
sp3125	15.996	6.92495	2.30151	3.00887	0.00262224	0.0230882	Bacteria	Bacteria_none	Firmicutes	Bacilli	Bacillales	Bacillaceae	Mesobacillus	Mesobacillus subterraneus	Mangrove: Sediment	uTitan(L):Qiagen	Mesobacillus subterraneus	164	0	164
sp2016	15.9111	6.9176	2.28673	3.0251	0.0024855	0.0221882	Bacteria	Bacteria_none	Firmicutes	Clostridia	Eubacteriales	Clostridiaceae	Senegalia	Senegalia massiliensis	Mangrove: Sediment	uTitan(L):Qiagen	Senegalia massiliensis	170	0	170
sp2782	15.9023	6.91671	2.34833	2.94537	0.00322568	0.0268711	Bacteria	Bacteria_none	Firmicutes	Bacilli	Bacillales	Bacillaceae	Ornithinibacillus	Ornithinibacillus californiensis	Mangrove: Sediment	uTitan(L):Qiagen	Ornithinibacillus californiensis	167	0	167
sp1459	15.9019	6.91669	1.73416	3.9885	6.65E-05	0.00146116	Bacteria	Bacteria_none	Proteobacteria	Gammaproteobacteria	Vibrionales	Vibrionaceae	Vibrio	Vibrio gallicus	Mangrove: Sediment	uTitan(L):Qiagen	Vibrio gallicus	178	0	178
sp2281	15.7985	6.90744	2.32728	2.96803	0.00299719	0.0256006	Bacteria	Bacteria_none	Actinobacteria	Actinomycetia	Propionibacteriales	Propionibacteriaceae	Auraticoccus	Auraticoccus monumenti	Mangrove: Sediment	uTitan(L):Qiagen	Auraticoccus monumenti	170	0	170
sp2245	15.7759	6.90478	1.77076	3.89933	9.65E-05	0.00191618	Bacteria	Bacteria_none	Proteobacteria	Gammaproteobacteria	Cardiobacteriales	Cardiobacteriaceae	Cardiobacterium	Cardiobacterium valvarum	Mangrove: Sediment	uTitan(L):Qiagen	Cardiobacterium valvarum	170	0	170
sp2743	15.8411	6.89971	1.45893	4.7293	2.25E-06	5.27E-05	Bacteria	Bacteria_none	Proteobacteria	Betaproteobacteria	Burkholderiales	Comamonadaceae	Vandammella	Vandammella animalimorsus	Mangrove: Water	uTitan(L):Qiagen	Vandammella animalimorsus	188	0	188
sp1745	15.6803	6.89616	2.34553	2.94013	0.00328074	0.0268711	Bacteria	Bacteria_none	Proteobacteria	Alphaproteobacteria	Kordiimonadales	Temperatibacteraceae	Temperatibacter	Temperatibacter marinus	Mangrove: Sediment	uTitan(L):Qiagen	Temperatibacter marinus	160	0	160
sp2598	15.6086	6.89089	2.23183	3.08755	0.00201812	0.0193604	Bacteria	Bacteria_none	Actinobacteria	Actinomycetia	Propionibacteriales	Nocardioidaceae	Tenggerimyces	Tenggerimyces flavus	Mangrove: Sediment	uTitan(L):Qiagen	Tenggerimyces flavus	189	0	189
sp1303	15.5775	6.887	2.27589	3.02606	0.0024776	0.0221882	Bacteria	Bacteria_none	Proteobacteria	Gammaproteobacteria	Oceanospirillales	Saccharospirillaceae	Reinekea	Reinekea thalattae	Mangrove: Sediment	uTitan(L):Qiagen	Reinekea thalattae	167	0	167
sp828	15.6479	6.8815	1.40713	4.89047	1.01E-06	2.71E-05	Bacteria	Bacteria_none	Proteobacteria	Gammaproteobacteria	Alteromonadales	Alteromonadaceae	Planctobacterium	Planctobacterium marinum	Mangrove: Water	uTitan(L):Qiagen	Planctobacterium marinum	183	0	183
sp2468	15.4834	6.87804	2.28838	3.00564	0.00265026	0.0232553	Bacteria	Bacteria_none	Deinococcus-Thermus	Deinococci	Thermales	Thermaceae	Thermus	Thermus anatoliensis	Mangrove: Sediment	uTitan(L):Qiagen	Thermus anatoliensis	161	0	161
sp686	15.2932	6.86025	2.33226	2.94146	0.00326673	0.0268711	Bacteria	Bacteria_none	Proteobacteria	Gammaproteobacteria	Alteromonadales	Alteromonadaceae	Paraneptunicella	Paraneptunicella aestuarii	Mangrove: Sediment	uTitan(L):Qiagen	Paraneptunicella aestuarii	160	0	160
sp148	11.5535	6.85713	1.97554	3.47102	0.00051849	0.0197262	Bacteria	Bacteria_none	Bacteroidota	Flavobacteriia	Flavobacteriales	Flavobacteriaceae	Muricauda	Muricauda ruestringensis	Mangrove: Sediment	uTitan(L):uTitan(F)	Muricauda ruestringensis	97	0	97
sp2637	15.2394	6.85506	1.84673	3.712	0.000205631	0.00359009	Bacteria	Bacteria_none	Deinococcus-Thermus	Deinococci	Thermales	Thermaceae	Rhabdothermus	Rhabdothermus arcticus	Mangrove: Sediment	uTitan(L):Qiagen	Rhabdothermus arcticus	165	0	165
sp3276	11.5189	6.85391	1.97839	3.46438	0.000531454	0.0199922	Bacteria	Bacteria_none	Proteobacteria	Gammaproteobacteria	Oceanospirillales	Halomonadaceae	Cobetia	Cobetia marina	Mangrove: Sediment	uTitan(L):uTitan(F)	Cobetia marina	101	0	101
sp2047	15.3161	6.85	1.44364	4.74494	2.09E-06	5.00E-05	Bacteria	Bacteria_none	Proteobacteria	Gammaproteobacteria	Pseudomonadales	Pseudomonadaceae	Pseudomonas	Pseudomonas monteilii	Mangrove: Water	uTitan(L):Qiagen	Pseudomonas monteilii	176	0	176
sp911	15.1383	6.84564	1.69205	4.04578	5.21E-05	0.00121887	Bacteria	Bacteria_none	Proteobacteria	Alphaproteobacteria	Hyphomicrobiales	Nitrobacteraceae	Bradyrhizobium	Bradyrhizobium campsiandrae	Mangrove: Sediment	uTitan(L):Qiagen	Bradyrhizobium campsiandrae	169	0	169
sp1674	15.1788	6.83712	1.44382	4.73545	2.19E-06	5.17E-05	Bacteria	Bacteria_none	Cyanobacteria	Cyanobacteria_Incertae_sedis	Pseudanabaenales	Prochlorotrichaceae	Persinema	Persinema komarekii	Mangrove: Water	uTitan(L):Qiagen	Persinema komarekii	175	0	175
sp902	15.1	6.82997	1.4247	4.79396	1.64E-06	4.17E-05	Bacteria	Bacteria_none	Proteobacteria	Gammaproteobacteria	Vibrionales	Vibrionaceae	Enterovibrio	Enterovibrio coralii	Mangrove: Water	uTitan(L):Qiagen	Enterovibrio coralii	176	0	176
sp2827	15.0951	6.82933	1.4352	4.75844	1.95E-06	4.73E-05	Bacteria	Bacteria_none	Deinococcus-Thermus	Deinococci	Thermales	Thermaceae	Meiothermus	Meiothermus ruber	Mangrove: Water	uTitan(L):Qiagen	Meiothermus ruber	175	0	175
sp1171	16.5136	6.82788	1.66818	4.09302	4.26E-05	0.0012533	Bacteria	Bacteria_none	Bacteroidota	Flavobacteriia	Flavobacteriales	Flavobacteriaceae	Muricauda	Muricauda beolgyonensis	Mangrove: Water	uTitan(L):uTitan(F)	Muricauda beolgyonensis	209	0	209
sp1123	14.9627	6.81691	1.42811	4.77338	1.81E-06	4.45E-05	Bacteria	Bacteria_none	Cyanobacteria	Cyanobacteria_Incertae_sedis	Oscillatoriales	Oscillatoriales_Incertae_sedis	Ammassolinea	Ammassolinea attenuata	Mangrove: Water	uTitan(L):Qiagen	Ammassolinea attenuata	175	0	175
sp2877	14.8954	6.81057	1.42172	4.79036	1.66E-06	4.19E-05	Bacteria	Bacteria_none	Firmicutes	Erysipelotrichia	Erysipelotrichales	Erysipelotrichaceae	Erysipelatoclostridium	Erysipelatoclostridium ramosum	Mangrove: Water	uTitan(L):Qiagen	Erysipelatoclostridium ramosum	175	0	175
sp1404	14.7473	6.8079	2.28628	2.97772	0.00290404	0.0248876	Bacteria	Bacteria_none	Proteobacteria	Gammaproteobacteria	Oceanospirillales	Oceanospirillaceae	Marinomonas	Marinomonas ostreistagni	Mangrove: Sediment	uTitan(L):Qiagen	Marinomonas ostreistagni	157	0	157
sp914	14.8439	6.8049	1.44953	4.69456	2.67E-06	6.17E-05	Bacteria	Bacteria_none	Proteobacteria	Gammaproteobacteria	Oceanospirillales	Saccharospirillaceae	Salinibius	Salinibius halmophilus	Mangrove: Water	uTitan(L):Qiagen	Salinibius halmophilus	171	0	171
sp2177	14.6763	6.80078	1.72403	3.94471	7.99E-05	0.00167002	Bacteria	Bacteria_none	Proteobacteria	Alphaproteobacteria	Rhodospirillales	Rhodospirillaceae	Dongia	Dongia rigui	Mangrove: Sediment	uTitan(L):Qiagen	Dongia rigui	162	0	162
sp2237	14.6182	6.795	2.31222	2.93873	0.00329556	0.0268981	Bacteria	Bacteria_none	Proteobacteria	Gammaproteobacteria	Oceanospirillales	Hahellaceae	Hahella	Hahella ganghwensis	Mangrove: Sediment	uTitan(L):Qiagen	Hahella ganghwensis	151	0	151
sp1998	14.5791	6.7912	2.32785	2.91737	0.00352996	0.0284499	Bacteria	Bacteria_none	Proteobacteria	Gammaproteobacteria	Oceanospirillales	Natronospirillaceae	Natronospirillum	Natronospirillum operosum	Mangrove: Sediment	uTitan(L):Qiagen	Natronospirillum operosum	152	0	152
sp2640	14.5041	6.78472	1.81644	3.73517	0.000187586	0.00337261	Bacteria	Bacteria_none	Firmicutes	Clostridia	Eubacteriales	Oscillospiraceae	Congzhengia	Congzhengia minquanensis	Mangrove: Sediment	uTitan(L):Qiagen	Congzhengia minquanensis	168	0	168
sp637	14.3774	6.77103	1.73694	3.89825	9.69E-05	0.00191618	Bacteria	Bacteria_none	Proteobacteria	Gammaproteobacteria	Vibrionales	Vibrionaceae	Vibrio	Vibrio tetraodonis	Mangrove: Sediment	uTitan(L):Qiagen	Vibrio tetraodonis	158	0	158
sp947	14.4714	6.76885	1.93689	3.4947	0.0004746	0.00454141	Bacteria	Bacteria_none	Proteobacteria	Deltaproteobacteria	Desulfuromonadales	Geobacteraceae	Geomonas	Geomonas terrae	Mangrove: Water	uTitan(L):Qiagen	Geomonas terrae	170	0	170
sp937	14.4609	6.76806	1.48484	4.5581	5.16E-06	0.000110046	Bacteria	Bacteria_none	Firmicutes	Bacilli	Bacillales	Staphylococcaceae	Abyssicoccus	Abyssicoccus albus	Mangrove: Water	uTitan(L):Qiagen	Abyssicoccus albus	171	0	171
sp1306	14.3058	6.76461	2.29994	2.94121	0.00326937	0.0268711	Bacteria	Bacteria_none	Tenericutes	Mollicutes	Anaeroplasmatales	Anaeroplasmataceae	Anaeroplasma	Anaeroplasma abactoclasticum	Mangrove: Sediment	uTitan(L):Qiagen	Anaeroplasma abactoclasticum	162	0	162
sp1045	15.7891	6.76346	1.61068	4.19912	2.68E-05	0.000838568	Bacteria	Bacteria_none	Proteobacteria	Gammaproteobacteria	Alteromonadales	Alteromonadaceae	Paraglaciecola	Paraglaciecola marina	Mangrove: Water	uTitan(L):uTitan(F)	Paraglaciecola marina	204	0	204
sp2100	14.2174	6.75479	1.76482	3.82746	0.00012947	0.00250277	Bacteria	Bacteria_none	Proteobacteria	Gammaproteobacteria	Pseudomonadales	Pseudomonadaceae	Pseudomonas	Pseudomonas bijieensis	Mangrove: Sediment	uTitan(L):Qiagen	Pseudomonas bijieensis	155	0	155
sp2660	15.6797	6.753	1.72189	3.92186	8.79E-05	0.00229701	Bacteria	Bacteria_none	Proteobacteria	Gammaproteobacteria	Moraxellales	Moraxellaceae	Acinetobacter	Acinetobacter indicus	Mangrove: Water	uTitan(L):uTitan(F)	Acinetobacter indicus	197	0	197
sp1834	15.6614	6.752	1.67999	4.01906	5.84E-05	0.00158335	Bacteria	Bacteria_none	Proteobacteria	Betaproteobacteria	Burkholderiales	Burkholderiaceae	Limnobacter	Limnobacter litoralis	Mangrove: Water	uTitan(L):uTitan(F)	Limnobacter litoralis	205	0	205
sp2928	14.1862	6.75163	2.3678	2.85143	0.00435228	0.0336027	Bacteria	Bacteria_none	Proteobacteria	Gammaproteobacteria	Cardiobacteriales	Ostreibacteriaceae	Ostreibacterium	Ostreibacterium oceani	Mangrove: Sediment	uTitan(L):Qiagen	Ostreibacterium oceani	145	0	145
sp682	15.6457	6.7504	1.57503	4.28589	1.82E-05	0.000586135	Bacteria	Bacteria_none	Proteobacteria	Gammaproteobacteria	Alteromonadales	Pseudoalteromonadaceae	Pseudoalteromonas	Pseudoalteromonas piratica	Mangrove: Water	uTitan(L):uTitan(F)	Pseudoalteromonas piratica	203	0	203
sp2878	14.1263	6.74606	2.32057	2.90707	0.00364836	0.0290401	Bacteria	Bacteria_none	Firmicutes	Bacilli	Bacillales	Paenibacillaceae	Paenibacillus	Paenibacillus bouchesdurhonensis	Mangrove: Sediment	uTitan(L):Qiagen	Paenibacillus bouchesdurhonensis	155	0	155
sp2304	14.1051	6.74354	2.28985	2.94497	0.00322984	0.0268711	Bacteria	Bacteria_none	Bacteroidota	Flavobacteriia	Flavobacteriales	Weeksellaceae	Chryseobacterium	Chryseobacterium proteolyticum	Mangrove: Sediment	uTitan(L):Qiagen	Chryseobacterium proteolyticum	148	0	148
sp2775	14.1435	6.73558	1.45635	4.62498	3.75E-06	8.45E-05	Bacteria	Bacteria_none	Firmicutes	Erysipelotrichia	Erysipelotrichales	Erysipelotrichaceae	Breznakia	Breznakia blatticola	Mangrove: Water	uTitan(L):Qiagen	Breznakia blatticola	165	0	165
sp1802	13.8462	6.71671	2.30601	2.9127	0.00358316	0.0286419	Bacteria	Bacteria_none	Acidobacteria	Acidobacteriia	Acidobacteriales	Acidobacteriaceae	Acidicapsa	Acidicapsa acidiphila	Mangrove: Sediment	uTitan(L):Qiagen	Acidicapsa acidiphila	144	0	144
sp2336	13.9203	6.71199	1.50559	4.45805	8.27E-06	0.00016373	Bacteria	Bacteria_none	Proteobacteria	Gammaproteobacteria	Oceanospirillales	Alcanivoracaceae	Alcanivorax	Alcanivorax jadensis	Mangrove: Water	uTitan(L):Qiagen	Alcanivorax jadensis	159	0	159
sp2147	13.7604	6.70928	1.71867	3.90377	9.47E-05	0.00191618	Bacteria	Bacteria_none	Firmicutes	Bacilli	Bacillales	Paenibacillaceae	Paenibacillus	Paenibacillus edaphicus	Mangrove: Sediment	uTitan(L):Qiagen	Paenibacillus edaphicus	165	0	165
sp2914	13.8717	6.70829	1.468	4.56968	4.88E-06	0.000106475	Bacteria	Bacteria_none	Firmicutes	Bacilli	Bacillales	Alicyclobacillaceae	Alicyclobacillus	Alicyclobacillus kakegawensis	Mangrove: Water	uTitan(L):Qiagen	Alicyclobacillus kakegawensis	165	0	165
sp986	13.633	6.6952	2.32297	2.88217	0.00394942	0.0310518	Bacteria	Bacteria_none	Proteobacteria	Gammaproteobacteria	Vibrionales	Vibrionaceae	Vibrio	Vibrio xuii	Mangrove: Sediment	uTitan(L):Qiagen	Vibrio xuii	158	0	158
sp1988	13.5578	6.68616	1.78217	3.75171	0.000175634	0.00320252	Bacteria	Bacteria_none	Proteobacteria	Alphaproteobacteria	Hyphomicrobiales	Beijerinckiaceae	Beijerinckia	Beijerinckia derxii	Mangrove: Sediment	uTitan(L):Qiagen	Beijerinckia derxii	148	0	148
sp1133	13.6402	6.6833	1.46088	4.57486	4.77E-06	0.000105056	Bacteria	Bacteria_none	Proteobacteria	Alphaproteobacteria	Hyphomicrobiales	Phyllobacteriaceae	Aminobacter	Aminobacter lissarensis	Mangrove: Water	uTitan(L):Qiagen	Aminobacter lissarensis	159	0	159
sp2608	13.4237	6.67226	2.2868	2.91772	0.00352596	0.0284499	Bacteria	Bacteria_none	Actinobacteria	Actinomycetia	Corynebacteriales	Corynebacteriaceae	Corynebacterium	Corynebacterium freiburgense	Mangrove: Sediment	uTitan(L):Qiagen	Corynebacterium freiburgense	144	0	144
sp2306	13.3757	6.66695	2.34098	2.84793	0.00440044	0.0338728	Bacteria	Bacteria_none	Proteobacteria	Deltaproteobacteria	Desulfobacterales	Desulfobacteraceae	Desulfofrigus	Desulfofrigus oceanense	Mangrove: Sediment	uTitan(L):Qiagen	Desulfofrigus oceanense	141	0	141
sp1391	13.3633	6.66517	1.79233	3.71871	0.000200242	0.00355049	Bacteria	Bacteria_none	Proteobacteria	Gammaproteobacteria	Vibrionales	Vibrionaceae	Vibrio	Vibrio zhugei	Mangrove: Sediment	uTitan(L):Qiagen	Vibrio zhugei	144	0	144
sp2884	13.4359	6.66204	1.54145	4.32193	1.55E-05	0.000262534	Bacteria	Bacteria_none	Firmicutes	Bacilli	Bacillales	Paenibacillaceae	Marinicrinis	Marinicrinis lubricantis	Mangrove: Water	uTitan(L):Qiagen	Marinicrinis lubricantis	159	0	159
sp901	13.3177	6.66102	2.31363	2.87903	0.00398896	0.0311721	Bacteria	Bacteria_none	Proteobacteria	Gammaproteobacteria	Alteromonadales	Pseudoalteromonadaceae	Psychrosphaera	Psychrosphaera saromensis	Mangrove: Sediment	uTitan(L):Qiagen	Psychrosphaera saromensis	146	0	146
sp1112	14.6734	6.65779	1.63241	4.07851	4.53E-05	0.00130794	Bacteria	Bacteria_none	Tenericutes	Mollicutes	Entomoplasmatales	Spiroplasmataceae	Spiroplasma	Spiroplasma kunkelii	Mangrove: Water	uTitan(L):uTitan(F)	Spiroplasma kunkelii	190	0	190
sp805	13.1575	6.64255	1.85091	3.58881	0.000332191	0.0050837	Bacteria	Bacteria_none	Proteobacteria	Gammaproteobacteria	Oceanospirillales	Halomonadaceae	Halomonas	Halomonas flava	Mangrove: Sediment	uTitan(L):Qiagen	Halomonas flava	139	0	139
sp2059	13.1385	6.64129	1.83088	3.62737	0.000286322	0.00448862	Bacteria	Bacteria_none	Bacteroidota	Flavobacteriia	Flavobacteriales	Flavobacteriaceae	Polaribacter	Polaribacter gangjinensis	Mangrove: Sediment	uTitan(L):Qiagen	Polaribacter gangjinensis	146	0	146
sp1897	13.2022	6.63689	1.52198	4.36068	1.30E-05	0.000230764	Bacteria	Bacteria_none	Proteobacteria	Gammaproteobacteria	Moraxellales	Moraxellaceae	Acinetobacter	Acinetobacter oryzae	Mangrove: Water	uTitan(L):Qiagen	Acinetobacter oryzae	157	0	157
sp521	13.1679	6.63303	1.47938	4.48367	7.34E-06	0.000151424	Bacteria	Bacteria_none	Proteobacteria	Gammaproteobacteria	Cellvibrionales	Cellvibrionaceae	Pseudoteredinibacter	Pseudoteredinibacter isoporae	Mangrove: Water	uTitan(L):Qiagen	Pseudoteredinibacter isoporae	156	0	156
sp2807	13.0547	6.6318	2.33219	2.84359	0.00446086	0.0341336	Bacteria	Bacteria_none	Actinobacteria	Actinomycetia	Bifidobacteriales	Bifidobacteriaceae	Bifidobacterium	Bifidobacterium saguini	Mangrove: Sediment	uTitan(L):Qiagen	Bifidobacterium saguini	136	0	136
sp2200	14.3852	6.62914	1.59079	4.16721	3.08E-05	0.000938573	Bacteria	Bacteria_none	Bacteroidota	Bacteroidia	Bacteroidales	Rikenellaceae	Alistipes	Alistipes indistinctus	Mangrove: Water	uTitan(L):uTitan(F)	Alistipes indistinctus	186	0	186
sp1795	13.1229	6.62799	1.46763	4.51613	6.30E-06	0.000132803	Bacteria	Bacteria_none	Proteobacteria	Alphaproteobacteria	Hyphomicrobiales	Aestuariivirgaceae	Aestuariivirga	Aestuariivirga litoralis	Mangrove: Water	uTitan(L):Qiagen	Aestuariivirga litoralis	155	0	155
sp717	14.3696	6.62784	1.60199	4.13726	3.51E-05	0.00105536	Bacteria	Bacteria_none	Proteobacteria	Epsilonproteobacteria	Campylobacterales	Campylobacteraceae	Campylobacter	Campylobacter ureolyticus	Mangrove: Water	uTitan(L):uTitan(F)	Campylobacter ureolyticus	188	0	188
sp2061	14.2535	6.6158	2.21168	2.99129	0.00277798	0.031803	Bacteria	Bacteria_none	Proteobacteria	Gammaproteobacteria	Vibrionales	Vibrionaceae	Vibrio	Vibrio atypicus	Mangrove: Water	uTitan(L):uTitan(F)	Vibrio atypicus	182	0	182
sp2001	12.8788	6.61198	1.84855	3.57685	0.000347758	0.00529044	Bacteria	Bacteria_none	Proteobacteria	Gammaproteobacteria	Vibrionales	Vibrionaceae	Vibrio	Vibrio oceanisediminis	Mangrove: Sediment	uTitan(L):Qiagen	Vibrio oceanisediminis	139	0	139
sp2532	12.979	6.61177	1.4676	4.50515	6.63E-06	0.000138361	Bacteria	Bacteria_none	Bacteroidota	Cytophagia	Cytophagales	Hymenobacteraceae	Adhaeribacter	Adhaeribacter soli	Mangrove: Water	uTitan(L):Qiagen	Adhaeribacter soli	152	0	152
sp2557	12.8473	6.60861	2.3322	2.83364	0.00460215	0.0349031	Bacteria	Bacteria_none	Proteobacteria	Alphaproteobacteria	Rhodospirillales	Azospirillaceae	Nitrospirillum	Nitrospirillum iridis	Mangrove: Sediment	uTitan(L):Qiagen	Nitrospirillum iridis	133	0	133
sp1463	12.7519	6.5979	2.32443	2.83851	0.00453251	0.0345788	Bacteria	Bacteria_none	Proteobacteria	Gammaproteobacteria	Oceanospirillales	Halomonadaceae	Halomonas	Halomonas magadiensis	Mangrove: Sediment	uTitan(L):Qiagen	Halomonas magadiensis	133	0	133
sp2524	12.7548	6.58678	1.47609	4.46232	8.11E-06	0.000162152	Bacteria	Bacteria_none	Armatimonadetes	Armatimonadia	Capsulimonadales	Capsulimonadaceae	Capsulimonas	Capsulimonas corticalis	Mangrove: Water	uTitan(L):Qiagen	Capsulimonas corticalis	150	0	150
sp1989	12.5988	6.58212	1.82505	3.60654	0.000310305	0.00480599	Bacteria	Bacteria_none	Proteobacteria	Alphaproteobacteria	Rhodobacterales	Roseobacteraceae	Actibacterium	Actibacterium atlanticum	Mangrove: Sediment	uTitan(L):Qiagen	Actibacterium atlanticum	151	0	151
sp1479	12.5137	6.57111	1.74897	3.75714	0.000171866	0.0031562	Bacteria	Bacteria_none	Bacteroidota	Flavobacteriia	Flavobacteriales	Flavobacteriaceae	Dokdonia	Dokdonia pacifica	Mangrove: Sediment	uTitan(L):Qiagen	Dokdonia pacifica	141	0	141
sp2934	12.5046	6.56986	1.77093	3.70983	0.000207398	0.00359009	Bacteria	Bacteria_none	Proteobacteria	Alphaproteobacteria	Hyphomicrobiales	Bartonellaceae	Bartonella	Bartonella rochalimae	Mangrove: Sediment	uTitan(L):Qiagen	Bartonella rochalimae	140	0	140
sp2774	12.5098	6.56972	1.8509	3.54948	0.000385995	0.00567082	Bacteria	Bacteria_none	Proteobacteria	Gammaproteobacteria	Chromatiales	Chromatiaceae	Marichromatium	Marichromatium indicum	Mangrove: Sediment	uTitan(L):Qiagen	Marichromatium indicum	133	0	133
sp1387	12.6078	6.56956	1.55183	4.23343	2.30E-05	0.000363011	Bacteria	Bacteria_none	Firmicutes	Bacilli	Bacillales	Bacillaceae	Bacillus	Bacillus daqingensis	Mangrove: Water	uTitan(L):Qiagen	Bacillus daqingensis	146	0	146
sp2381	12.5872	6.56747	1.50449	4.36523	1.27E-05	0.000230239	Bacteria	Bacteria_none	Proteobacteria	Alphaproteobacteria	Rhodobacterales	Roseobacteraceae	Thalassococcus	Thalassococcus lentus	Mangrove: Water	uTitan(L):Qiagen	Thalassococcus lentus	147	0	147
sp2164	13.7536	6.56439	1.626	4.03715	5.41E-05	0.00150277	Bacteria	Bacteria_none	Bacteroidota	Flavobacteriia	Flavobacteriales	Flavobacteriaceae	Flavobacterium	Flavobacterium pedocola	Mangrove: Water	uTitan(L):uTitan(F)	Flavobacterium pedocola	178	0	178
sp1111	12.5527	6.56384	1.48611	4.4168	1.00E-05	0.000194333	Bacteria	Bacteria_none	Proteobacteria	Gammaproteobacteria	Legionellales	Legionellaceae	Legionella	Legionella geestiana	Mangrove: Water	uTitan(L):Qiagen	Legionella geestiana	148	0	148
sp2291	12.3934	6.55665	1.79515	3.65243	0.000259767	0.00422396	Bacteria	Bacteria_none	Proteobacteria	Gammaproteobacteria	Vibrionales	Vibrionaceae	Vibrio	Vibrio penaeicida	Mangrove: Sediment	uTitan(L):Qiagen	Vibrio penaeicida	136	0	136
sp746	12.4745	6.55454	1.49324	4.38947	1.14E-05	0.000211954	Bacteria	Bacteria_none	Proteobacteria	Gammaproteobacteria	Thiotrichales	Thiotrichaceae	Thiothrix	Thiothrix nivea	Mangrove: Water	uTitan(L):Qiagen	Thiothrix nivea	146	0	146
sp2827	13.64	6.55223	1.62297	4.03718	5.41E-05	0.00150277	Bacteria	Bacteria_none	Deinococcus-Thermus	Deinococci	Thermales	Thermaceae	Meiothermus	Meiothermus ruber	Mangrove: Water	uTitan(L):uTitan(F)	Meiothermus ruber	175	0	175
sp1266	12.3505	6.55189	1.77716	3.68672	0.000227163	0.00384234	Bacteria	Bacteria_none	Proteobacteria	Gammaproteobacteria	Vibrionales	Vibrionaceae	Vibrio	Vibrio neptunius	Mangrove: Sediment	uTitan(L):Qiagen	Vibrio neptunius	137	0	137
sp758	12.4447	6.55144	1.4994	4.36937	1.25E-05	0.000228056	Bacteria	Bacteria_none	Proteobacteria	Alphaproteobacteria	Hyphomicrobiales	Rhodovibrionaceae	Limibacillus	Limibacillus halophilus	Mangrove: Water	uTitan(L):Qiagen	Limibacillus halophilus	147	0	147
sp2369	12.4393	6.55059	1.49097	4.39351	1.12E-05	0.000211954	Bacteria	Bacteria_none	Proteobacteria	Gammaproteobacteria	Vibrionales	Vibrionaceae	Grimontia	Grimontia sedimenti	Mangrove: Water	uTitan(L):Qiagen	Grimontia sedimenti	146	0	146
sp2042	12.3909	6.5451	1.49053	4.39113	1.13E-05	0.000211954	Bacteria	Bacteria_none	Proteobacteria	Gammaproteobacteria	Vibrionales	Vibrionaceae	Photobacterium	Photobacterium marinum	Mangrove: Water	uTitan(L):Qiagen	Photobacterium marinum	146	0	146
sp1207	13.5459	6.54226	1.62356	4.02958	5.59E-05	0.00153283	Bacteria	Bacteria_none	Planctomycetota	Planctomycetia	Planctomycetales	Planctomycetaceae	Gimesia	Gimesia aquarii	Mangrove: Water	uTitan(L):uTitan(F)	Gimesia aquarii	174	0	174
sp116	12.3109	6.53574	1.48989	4.38674	1.15E-05	0.000212594	Bacteria	Bacteria_none	Proteobacteria	Gammaproteobacteria	Cellvibrionales	Halieaceae	Congregibacter	Congregibacter litoralis	Mangrove: Water	uTitan(L):Qiagen	Congregibacter litoralis	145	0	145
sp2508	12.0995	6.52464	1.85344	3.52028	0.000431089	0.00615739	Bacteria	Bacteria_none	Proteobacteria	Gammaproteobacteria	Oceanospirillales	Oceanospirillales_Incertae_sedis	Terasakiispira	Terasakiispira papahanaumokuakeensis	Mangrove: Sediment	uTitan(L):Qiagen	Terasakiispira papahanaumokuakeensis	153	0	153
sp2697	13.3786	6.52438	1.6687	3.90987	9.23E-05	0.00238598	Bacteria	Bacteria_none	Firmicutes	Clostridia	Eubacteriales	Peptostreptococcaceae	Romboutsia	Romboutsia timonensis	Mangrove: Water	uTitan(L):uTitan(F)	Romboutsia timonensis	172	0	172
sp2900	12.0706	6.52012	1.81481	3.59274	0.000327222	0.00503765	Bacteria	Bacteria_none	Actinobacteria	Actinomycetia	Propionibacteriales	Nocardioidaceae	Nocardioides	Nocardioides yefusunii	Mangrove: Sediment	uTitan(L):Qiagen	Nocardioides yefusunii	144	0	144
sp2742	12.0779	6.51937	1.786	3.65026	0.00026198	0.00422396	Bacteria	Bacteria_none	Proteobacteria	Gammaproteobacteria	Chromatiales	Ectothiorhodospiraceae	Thioalkalivibrio	Thioalkalivibrio paradoxus	Mangrove: Sediment	uTitan(L):Qiagen	Thioalkalivibrio paradoxus	132	0	132
sp2430	13.3129	6.51775	1.64135	3.97098	7.16E-05	0.00189344	Bacteria	Bacteria_none	Fusobacteria	Fusobacteriia	Fusobacteriales	Fusobacteriaceae	Psychrilyobacter	Psychrilyobacter atlanticus	Mangrove: Water	uTitan(L):uTitan(F)	Psychrilyobacter atlanticus	175	0	175
sp186	12.1227	6.51331	1.50751	4.32057	1.56E-05	0.000262534	Bacteria	Bacteria_none	Proteobacteria	Alphaproteobacteria	Rhodospirillales	Thalassobaculaceae	Nisaea	Nisaea acidiphila	Mangrove: Water	uTitan(L):Qiagen	Nisaea acidiphila	142	0	142
sp552	11.9928	6.50958	1.75882	3.70112	0.000214651	0.00367911	Bacteria	Bacteria_none	Proteobacteria	Alphaproteobacteria	Sphingomonadales	Erythrobacteraceae	Alteriqipengyuania	Alteriqipengyuania abyssalis	Mangrove: Sediment	uTitan(L):Qiagen	Alteriqipengyuania abyssalis	134	0	134
sp2012	11.9965	6.49858	1.5108	4.30141	1.70E-05	0.000281401	Bacteria	Bacteria_none	Firmicutes	Clostridia	Eubacteriales	Eubacteriales Family XII. Incertae Sedis	Guggenheimella	Guggenheimella bovis	Mangrove: Water	uTitan(L):Qiagen	Guggenheimella bovis	142	0	142
sp2032	11.8799	6.49798	2.39697	2.71091	0.00670986	0.0465532	Bacteria	Bacteria_none	Firmicutes	Clostridia	Eubacteriales	Clostridiaceae	Fervidicella	Fervidicella metallireducens	Mangrove: Sediment	uTitan(L):Qiagen	Fervidicella metallireducens	159	0	159
sp2157	11.9534	6.49275	1.50615	4.31083	1.63E-05	0.000272004	Bacteria	Bacteria_none	Actinobacteria	Actinomycetia	Micrococcales	Dermacoccaceae	Dermacoccus	Dermacoccus abyssi	Mangrove: Water	uTitan(L):Qiagen	Dermacoccus abyssi	139	0	139
sp2190	11.7652	6.48187	1.79048	3.62018	0.000294395	0.00458722	Bacteria	Bacteria_none	Proteobacteria	Gammaproteobacteria	Legionellales	Legionellaceae	Legionella	Legionella dresdenensis	Mangrove: Sediment	uTitan(L):Qiagen	Legionella dresdenensis	131	0	131
sp1133	11.7533	6.48114	1.74263	3.71918	0.000199869	0.00355049	Bacteria	Bacteria_none	Proteobacteria	Alphaproteobacteria	Hyphomicrobiales	Phyllobacteriaceae	Aminobacter	Aminobacter lissarensis	Mangrove: Sediment	uTitan(L):Qiagen	Aminobacter lissarensis	136	0	136
sp699	11.7536	6.48114	1.77458	3.6522	0.000260001	0.00422396	Bacteria	Bacteria_none	Proteobacteria	Epsilonproteobacteria	Campylobacterales	Arcobacteraceae	Halarcobacter	Halarcobacter bivalviorum	Mangrove: Sediment	uTitan(L):Qiagen	Halarcobacter bivalviorum	135	0	135
sp808	11.7468	6.48064	2.30928	2.80635	0.00501065	0.0372323	Bacteria	Bacteria_none	Proteobacteria	Gammaproteobacteria	Oceanospirillales	Oceanospirillaceae	Marinomonas	Marinomonas epiphytica	Mangrove: Sediment	uTitan(L):Qiagen	Marinomonas epiphytica	139	0	139
sp2448	11.7411	6.4786	1.83017	3.53989	0.000400289	0.0057893	Bacteria	Bacteria_none	Proteobacteria	Alphaproteobacteria	Rhodospirillales	Acetobacteraceae	Rhodovarius	Rhodovarius crocodyli	Mangrove: Sediment	uTitan(L):Qiagen	Rhodovarius crocodyli	128	0	128
sp2542	11.7239	6.47672	2.32925	2.7806	0.00542588	0.0391852	Bacteria	Bacteria_none	Firmicutes	Clostridia	Eubacteriales	Oscillospiraceae	Ruminococcus	Ruminococcus champanellensis	Mangrove: Sediment	uTitan(L):Qiagen	Ruminococcus champanellensis	124	0	124
sp2733	11.814	6.47652	1.54306	4.19719	2.70E-05	0.000419426	Bacteria	Bacteria_none	Cyanobacteria	Cyanobacteria_Incertae_sedis	Pseudanabaenales	Pseudanabaenaceae	Komvophoron	Komvophoron kgarii	Mangrove: Water	uTitan(L):Qiagen	Komvophoron kgarii	140	0	140
sp947	12.9392	6.47646	2.24559	2.88408	0.00392564	0.0407606	Bacteria	Bacteria_none	Proteobacteria	Deltaproteobacteria	Desulfuromonadales	Geobacteraceae	Geomonas	Geomonas terrae	Mangrove: Water	uTitan(L):uTitan(F)	Geomonas terrae	170	0	170
sp1633	11.7948	6.47371	1.51151	4.28293	1.84E-05	0.00030069	Bacteria	Bacteria_none	Proteobacteria	Alphaproteobacteria	Hyphomicrobiales	Phyllobacteriaceae	Mesorhizobium	Mesorhizobium abyssinicae	Mangrove: Water	uTitan(L):Qiagen	Mesorhizobium abyssinicae	138	0	138
sp2707	11.7899	6.47314	1.54951	4.17754	2.95E-05	0.000436605	Bacteria	Bacteria_none	Firmicutes	Bacilli	Lactobacillales	Lactobacillaceae	Lactobacillus	Lactobacillus iners	Mangrove: Water	uTitan(L):Qiagen	Lactobacillus iners	138	0	138
sp1914	11.7509	6.46873	1.51985	4.25616	2.08E-05	0.000336217	Bacteria	Bacteria_none	Firmicutes	Bacilli	Bacillales	Bacillaceae	Oceanobacillus	Oceanobacillus halotolerans	Mangrove: Water	uTitan(L):Qiagen	Oceanobacillus halotolerans	139	0	139
sp1658	11.7347	6.46624	2.01483	3.20932	0.0013305	0.0100046	Bacteria	Bacteria_none	Proteobacteria	Gammaproteobacteria	Alteromonadales	Alteromonadaceae	Alteromonas	Alteromonas australica	Mangrove: Water	uTitan(L):Qiagen	Alteromonas australica	136	0	136
sp2802	11.6077	6.46394	2.3506	2.74991	0.00596117	0.0422209	Bacteria	Bacteria_none	Firmicutes	Clostridia	Eubacteriales	Clostridiaceae	Clostridium	Clostridium punense	Mangrove: Sediment	uTitan(L):Qiagen	Clostridium punense	144	0	144
sp2054	11.5883	6.45995	2.38048	2.71372	0.0066532	0.0463651	Bacteria	Bacteria_none	Bacteroidota	Flavobacteriia	Flavobacteriales	Schleiferiaceae	Phaeocystidibacter	Phaeocystidibacter marisrubri	Mangrove: Sediment	uTitan(L):Qiagen	Phaeocystidibacter marisrubri	122	0	122
sp1325	11.5748	6.4575	1.90032	3.39811	0.000678533	0.00841917	Bacteria	Bacteria_none	Proteobacteria	Gammaproteobacteria	Gammaproteobacteria_Incertae_sedis	Celerinatantimonadaceae	Celerinatantimonas	Celerinatantimonas diazotrophica	Mangrove: Sediment	uTitan(L):Qiagen	Celerinatantimonas diazotrophica	122	0	122
sp795	11.6287	6.45296	1.54472	4.17743	2.95E-05	0.000436605	Bacteria	Bacteria_none	Proteobacteria	Gammaproteobacteria	Cellvibrionales	Cellvibrionaceae	Teredinibacter	Teredinibacter franksiae	Mangrove: Water	uTitan(L):Qiagen	Teredinibacter franksiae	135	0	135
sp2234	11.5062	6.44946	2.36782	2.7238	0.00645362	0.0452105	Bacteria	Bacteria_none	Firmicutes	Bacilli	Lactobacillales	Lactobacillaceae	Periweissella	Periweissella cryptocerci	Mangrove: Sediment	uTitan(L):Qiagen	Periweissella cryptocerci	119	0	119
sp2656	11.4583	6.44521	2.37865	2.7096	0.00673637	0.046557	Bacteria	Bacteria_none	Proteobacteria	Deltaproteobacteria	Desulfovibrionales	Desulfovibrionaceae	Maridesulfovibrio	Maridesulfovibrio hydrothermalis	Mangrove: Sediment	uTitan(L):Qiagen	Maridesulfovibrio hydrothermalis	141	0	141
sp1161	11.5556	6.44463	1.53665	4.19394	2.74E-05	0.000422104	Bacteria	Bacteria_none	Proteobacteria	Alphaproteobacteria	Hyphomicrobiales	Phyllobacteriaceae	Roseitalea	Roseitalea porphyridii	Mangrove: Water	uTitan(L):Qiagen	Roseitalea porphyridii	137	0	137
sp2287	11.5002	6.43659	1.57366	4.09021	4.31E-05	0.000610286	Bacteria	Bacteria_none	Proteobacteria	Gammaproteobacteria	Alteromonadales	Alteromonadaceae	Aestuariibacter	Aestuariibacter halophilus	Mangrove: Water	uTitan(L):Qiagen	Aestuariibacter halophilus	132	0	132
sp2914	12.5646	6.43428	1.65139	3.89628	9.77E-05	0.00249478	Bacteria	Bacteria_none	Firmicutes	Bacilli	Bacillales	Alicyclobacillaceae	Alicyclobacillus	Alicyclobacillus kakegawensis	Mangrove: Water	uTitan(L):uTitan(F)	Alicyclobacillus kakegawensis	165	0	165
sp2067	11.4603	6.43243	1.5537	4.14007	3.47E-05	0.00050644	Bacteria	Bacteria_none	Cyanobacteria	Cyanobacteria_Incertae_sedis	Chroococcales	Microcystaceae	Microcystis	Microcystis aeruginosa	Mangrove: Water	uTitan(L):Qiagen	Microcystis aeruginosa	135	0	135
sp2070	11.3289	6.42763	1.84175	3.48995	0.000483113	0.00671396	Bacteria	Bacteria_none	Proteobacteria	Alphaproteobacteria	Hyphomicrobiales	Rhodobiaceae	Rhodobium	Rhodobium gokarnense	Mangrove: Sediment	uTitan(L):Qiagen	Rhodobium gokarnense	127	0	127
sp2004	11.3344	6.42724	1.89112	3.39865	0.000677195	0.00841917	Bacteria	Bacteria_none	Proteobacteria	Alphaproteobacteria	Rhodobacterales	Roseobacteraceae	Marivita	Marivita roseacus	Mangrove: Sediment	uTitan(L):Qiagen	Marivita roseacus	120	0	120
sp3031	11.3284	6.42708	1.79942	3.57175	0.000354601	0.00536281	Bacteria	Bacteria_none	Bacteroidota	Cytophagia	Cytophagales	Cyclobacteriaceae	Belliella	Belliella kenyensis	Mangrove: Sediment	uTitan(L):Qiagen	Belliella kenyensis	125	0	125
sp611	11.2819	6.42115	1.81379	3.54018	0.000399848	0.0057893	Bacteria	Bacteria_none	Proteobacteria	Gammaproteobacteria	Vibrionales	Vibrionaceae	Vibrio	Vibrio alfacsensis	Mangrove: Sediment	uTitan(L):Qiagen	Vibrio alfacsensis	124	0	124
sp2449	11.2349	6.41624	1.76359	3.63817	0.000274578	0.00438472	Bacteria	Bacteria_none	Proteobacteria	Gammaproteobacteria	Pasteurellales	Psittacicellaceae	Psittacicella	Psittacicella hinzii	Mangrove: Sediment	uTitan(L):Qiagen	Psittacicella hinzii	131	0	131
sp1891	11.2208	6.41296	1.84109	3.48325	0.000495367	0.00683875	Bacteria	Bacteria_none	Proteobacteria	Gammaproteobacteria	Vibrionales	Vibrionaceae	Vibrio	Vibrio gazogenes	Mangrove: Sediment	uTitan(L):Qiagen	Vibrio gazogenes	121	0	121
sp2531	11.1701	6.4066	1.81938	3.5213	0.000429433	0.00615739	Bacteria	Bacteria_none	Firmicutes	Clostridia	Thermoanaerobacterales	Thermoanaerobacteraceae	Moorella	Moorella thermoacetica	Mangrove: Sediment	uTitan(L):Qiagen	Moorella thermoacetica	122	0	122
sp1938	11.219	6.40142	1.53129	4.18042	2.91E-05	0.000436605	Bacteria	Bacteria_none	Bacteroidota	Flavobacteriia	Flavobacteriales	Flavobacteriaceae	Flavobacterium	Flavobacterium brevivitae	Mangrove: Water	uTitan(L):Qiagen	Flavobacterium brevivitae	131	0	131
sp2159	11.0625	6.39239	1.84878	3.45763	0.000544947	0.00729692	Bacteria	Bacteria_none	Proteobacteria	Gammaproteobacteria	Vibrionales	Vibrionaceae	Vibrio	Vibrio galatheae	Mangrove: Sediment	uTitan(L):Qiagen	Vibrio galatheae	119	0	119
sp901	11.1469	6.39235	1.52742	4.18507	2.85E-05	0.000432435	Bacteria	Bacteria_none	Proteobacteria	Gammaproteobacteria	Alteromonadales	Pseudoalteromonadaceae	Psychrosphaera	Psychrosphaera saromensis	Mangrove: Water	uTitan(L):Qiagen	Psychrosphaera saromensis	131	0	131
sp2858	11.1068	6.3873	1.54395	4.137	3.52E-05	0.000509434	Bacteria	Bacteria_none	Firmicutes	Bacilli	Lactobacillales	Lactobacillaceae	Oenococcus	Oenococcus oeni	Mangrove: Water	uTitan(L):Qiagen	Oenococcus oeni	131	0	131
sp737	12.1664	6.38727	2.24987	2.83895	0.00452628	0.0449593	Bacteria	Bacteria_none	Chlamydiae	Chlamydiia	Chlamydiales	Chlamydiaceae	Chlamydia	Chlamydia caviae	Mangrove: Water	uTitan(L):uTitan(F)	Chlamydia caviae	154	0	154
sp1849	10.9325	6.37599	1.7909	3.56021	0.000370555	0.00548784	Bacteria	Bacteria_none	Proteobacteria	Alphaproteobacteria	Hyphomicrobiales	Methylobacteriaceae	Methylorubrum	Methylorubrum rhodinum	Mangrove: Sediment	uTitan(L):Qiagen	Methylorubrum rhodinum	122	0	122
sp1635	10.997	6.37298	1.60694	3.96591	7.31E-05	0.000971567	Bacteria	Bacteria_none	Proteobacteria	Gammaproteobacteria	Pseudomonadales	Pseudomonadaceae	Pseudomonas	Pseudomonas oleovorans	Mangrove: Water	uTitan(L):Qiagen	Pseudomonas oleovorans	130	0	130
sp1770	12.0383	6.37238	1.64269	3.87923	0.00010479	0.00264594	Bacteria	Bacteria_none	Proteobacteria	Gammaproteobacteria	Methylococcales	Methylococcaceae	Methylotuvimicrobium	Methylotuvimicrobium pelagicum	Mangrove: Water	uTitan(L):uTitan(F)	Methylotuvimicrobium pelagicum	157	0	157
sp1241	10.9077	6.37211	1.8419	3.45954	0.000541107	0.00728922	Bacteria	Bacteria_none	Proteobacteria	Alphaproteobacteria	Rhodospirillales	Terasakiellaceae	Terasakiella	Terasakiella brassicae	Mangrove: Sediment	uTitan(L):Qiagen	Terasakiella brassicae	118	0	118
sp1757	10.8923	6.37026	1.87086	3.405	0.000661642	0.00837972	Bacteria	Bacteria_none	Proteobacteria	Alphaproteobacteria	Hyphomicrobiales	Reyranellaceae	Reyranella	Reyranella graminifolii	Mangrove: Sediment	uTitan(L):Qiagen	Reyranella graminifolii	119	0	119
sp521	11.9461	6.36133	1.6593	3.83375	0.000126206	0.00304815	Bacteria	Bacteria_none	Proteobacteria	Gammaproteobacteria	Cellvibrionales	Cellvibrionaceae	Pseudoteredinibacter	Pseudoteredinibacter isoporae	Mangrove: Water	uTitan(L):uTitan(F)	Pseudoteredinibacter isoporae	156	0	156
sp2375	10.8076	6.36012	2.35041	2.70597	0.00681059	0.0468183	Bacteria	Bacteria_none	Firmicutes	Bacilli	Bacillales	Paenibacillaceae	Paenibacillus	Paenibacillus tengchongensis	Mangrove: Sediment	uTitan(L):Qiagen	Paenibacillus tengchongensis	124	0	124
sp2917	11.8259	6.34667	1.65295	3.83961	0.00012323	0.00300897	Bacteria	Bacteria_none	Tenericutes	Mollicutes	Mycoplasmatales	Mycoplasmataceae	Ureaplasma	Ureaplasma felinum	Mangrove: Water	uTitan(L):uTitan(F)	Ureaplasma felinum	154	0	154
sp2486	10.6637	6.34124	1.78142	3.55965	0.000371353	0.00548784	Bacteria	Bacteria_none	Proteobacteria	Deltaproteobacteria	Desulfovibrionales	Desulfovibrionaceae	Desulfovibrio	Desulfovibrio oxyclinae	Mangrove: Sediment	uTitan(L):Qiagen	Desulfovibrio oxyclinae	126	0	126
sp1670	10.6668	6.33951	1.93529	3.27574	0.00105386	0.0120422	Bacteria	Bacteria_none	Proteobacteria	Alphaproteobacteria	Rhodospirillales	Kiloniellaceae	Curvivirga	Curvivirga aplysinae	Mangrove: Sediment	uTitan(L):Qiagen	Curvivirga aplysinae	112	0	112
sp2532	11.7252	6.33422	1.64447	3.85183	0.000117238	0.00289448	Bacteria	Bacteria_none	Bacteroidota	Cytophagia	Cytophagales	Hymenobacteraceae	Adhaeribacter	Adhaeribacter soli	Mangrove: Water	uTitan(L):uTitan(F)	Adhaeribacter soli	152	0	152
sp2837	10.6145	6.33363	1.81307	3.49332	0.000477063	0.00670234	Bacteria	Bacteria_none	Firmicutes	Bacilli	Bacillales	Paenibacillaceae	Paenibacillus	Paenibacillus hispanicus	Mangrove: Sediment	uTitan(L):Qiagen	Paenibacillus hispanicus	120	0	120
sp712	11.7086	6.33221	1.70051	3.72372	0.000196311	0.00445105	Bacteria	Bacteria_none	Proteobacteria	Alphaproteobacteria	Hyphomicrobiales	Rhodovibrionaceae	Pelagibius	Pelagibius litoralis	Mangrove: Water	uTitan(L):uTitan(F)	Pelagibius litoralis	152	0	152
sp2232	10.451	6.31222	1.85107	3.41005	0.000649521	0.00829278	Bacteria	Bacteria_none	Proteobacteria	Betaproteobacteria	Burkholderiales	Alcaligenaceae	Achromobacter	Achromobacter aloeverae	Mangrove: Sediment	uTitan(L):Qiagen	Achromobacter aloeverae	123	0	123
sp955	10.543	6.31175	1.57136	4.01674	5.90E-05	0.000811908	Bacteria	Bacteria_none	Cyanobacteria	Cyanobacteria_Incertae_sedis	Oscillatoriales	Sirenicapillariaceae	Sirenicapillaria	Sirenicapillaria stauglerae	Mangrove: Water	uTitan(L):Qiagen	Sirenicapillaria stauglerae	123	0	123
sp1612	10.5244	6.30925	1.55881	4.04748	5.18E-05	0.000722586	Bacteria	Bacteria_none	Cyanobacteria	Cyanobacteria_Incertae_sedis	Pseudanabaenales	Oculatellaceae	Drouetiella	Drouetiella fasciculata	Mangrove: Water	uTitan(L):Qiagen	Drouetiella fasciculata	123	0	123
sp1325	10.5128	6.30713	1.57644	4.00086	6.31E-05	0.000856207	Bacteria	Bacteria_none	Proteobacteria	Gammaproteobacteria	Gammaproteobacteria_Incertae_sedis	Celerinatantimonadaceae	Celerinatantimonas	Celerinatantimonas diazotrophica	Mangrove: Water	uTitan(L):Qiagen	Celerinatantimonas diazotrophica	121	0	121
sp1989	11.4922	6.3051	1.65883	3.80093	0.000144152	0.00340751	Bacteria	Bacteria_none	Proteobacteria	Alphaproteobacteria	Rhodobacterales	Roseobacteraceae	Actibacterium	Actibacterium atlanticum	Mangrove: Water	uTitan(L):uTitan(F)	Actibacterium atlanticum	148	0	148
sp2681	11.4575	6.30114	1.68312	3.74372	0.000181314	0.00419667	Bacteria	Bacteria_none	Proteobacteria	Gammaproteobacteria	Pasteurellales	Pasteurellaceae	Seminibacterium	Seminibacterium arietis	Mangrove: Water	uTitan(L):uTitan(F)	Seminibacterium arietis	150	0	150
sp714	10.4167	6.29508	1.57721	3.99128	6.57E-05	0.000879272	Bacteria	Bacteria_none	Proteobacteria	Gammaproteobacteria	Oceanospirillales	Halomonadaceae	Halomonas	Halomonas alkaliphila	Mangrove: Water	uTitan(L):Qiagen	Halomonas alkaliphila	124	0	124
sp1679	10.4167	6.29479	1.56099	4.03255	5.52E-05	0.000764569	Bacteria	Bacteria_none	Proteobacteria	Alphaproteobacteria	Hyphomicrobiales	Methylobacteriaceae	Methylobacterium	Methylobacterium platani	Mangrove: Water	uTitan(L):Qiagen	Methylobacterium platani	123	0	123
sp2826	10.2982	6.29107	1.85112	3.39851	0.000677534	0.00841917	Bacteria	Bacteria_none	Actinobacteria	Actinomycetia	Actinomycetales	Actinomycetaceae	Actinotignum	Actinotignum schaalii	Mangrove: Sediment	uTitan(L):Qiagen	Actinotignum schaalii	122	0	122
sp2008	10.2651	6.28466	1.84326	3.40953	0.000650757	0.00829278	Bacteria	Bacteria_none	Tenericutes	Tenericutes_Incertae_sedis	Mycoplasmoidales	Mycoplasmoidaceae	Malacoplasma	Malacoplasma muris	Mangrove: Sediment	uTitan(L):Qiagen	Malacoplasma muris	112	0	112
sp2605	10.3411	6.28338	1.59493	3.9396	8.16E-05	0.00105483	Bacteria	Bacteria_none	Tenericutes	Mollicutes	Mycoplasmatales	Mycoplasmataceae	Mycoplasma	Mycoplasma todarodis	Mangrove: Water	uTitan(L):Qiagen	Mycoplasma todarodis	119	0	119
sp3160	10.3201	6.28137	1.61465	3.89024	0.000100144	0.00124538	Bacteria	Bacteria_none	Tenericutes	Mollicutes	Acholeplasmatales	Acholeplasmataceae	Haploplasma	Haploplasma cavigenitalium	Mangrove: Water	uTitan(L):Qiagen	Haploplasma cavigenitalium	122	0	122
sp3047	10.2196	6.27983	1.82276	3.44523	0.000570566	0.00752269	Bacteria	Bacteria_none	Firmicutes	Clostridia	Eubacteriales	Clostridiaceae	Clostridium	Clostridium prolinivorans	Mangrove: Sediment	uTitan(L):Qiagen	Clostridium prolinivorans	120	0	120
sp2331	10.1846	6.2625	1.58576	3.94922	7.84E-05	0.00103401	Bacteria	Bacteria_none	Firmicutes	Bacilli	Lactobacillales	Lactobacillaceae	Companilactobacillus	Companilactobacillus paralimentarius	Mangrove: Water	uTitan(L):Qiagen	Companilactobacillus paralimentarius	121	0	121
sp3236	10.0233	6.23945	1.59459	3.91288	9.12E-05	0.00116402	Bacteria	Bacteria_none	Firmicutes	Clostridia	Eubacteriales	Desulfitobacteriaceae	Desulfosporosinus	Desulfosporosinus fructosivorans	Mangrove: Water	uTitan(L):Qiagen	Desulfosporosinus fructosivorans	119	0	119
sp1316	9.96263	6.2303	1.57867	3.94654	7.93E-05	0.00103401	Bacteria	Bacteria_none	Proteobacteria	Gammaproteobacteria	Alteromonadales	Shewanellaceae	Shewanella	Shewanella corallii	Mangrove: Water	uTitan(L):Qiagen	Shewanella corallii	117	0	117
sp2658	9.92436	6.22456	1.59562	3.90102	9.58E-05	0.00120669	Bacteria	Bacteria_none	Firmicutes	Bacilli	Bacillales	Paenibacillaceae	Thermobacillus	Thermobacillus xylanilyticus	Mangrove: Water	uTitan(L):Qiagen	Thermobacillus xylanilyticus	116	0	116
sp3213	9.80811	6.21913	1.9373	3.2102	0.00132643	0.0145117	Bacteria	Bacteria_none	Actinobacteria	Actinomycetia	Streptomycetales	Streptomycetaceae	Streptomyces	Streptomyces subrutilus	Mangrove: Sediment	uTitan(L):Qiagen	Streptomyces subrutilus	107	0	107
sp2536	9.82256	6.20947	1.62291	3.82615	0.000130165	0.00157825	Bacteria	Bacteria_none	Firmicutes	Clostridia	Eubacteriales	Clostridiaceae	Butyricicoccus	Butyricicoccus porcorum	Mangrove: Water	uTitan(L):Qiagen	Butyricicoccus porcorum	114	0	114
sp872	9.77601	6.20276	1.59385	3.89168	9.96E-05	0.00124538	Bacteria	Bacteria_none	Bacteroidota	Cytophagia	Cytophagales	Reichenbachiellaceae	Marinoscillum	Marinoscillum luteum	Mangrove: Water	uTitan(L):Qiagen	Marinoscillum luteum	114	0	114
sp3207	10.6959	6.20175	1.72285	3.5997	0.000318589	0.00655468	Bacteria	Bacteria_none	Proteobacteria	Alphaproteobacteria	Hyphomicrobiales	Blastochloridaceae	Blastochloris	Blastochloris tepida	Mangrove: Water	uTitan(L):uTitan(F)	Blastochloris tepida	139	0	139
sp1914	10.6088	6.19013	1.69009	3.6626	0.000249666	0.00542113	Bacteria	Bacteria_none	Firmicutes	Bacilli	Bacillales	Bacillaceae	Oceanobacillus	Oceanobacillus halotolerans	Mangrove: Water	uTitan(L):uTitan(F)	Oceanobacillus halotolerans	139	0	139
sp2617	10.5954	6.18751	1.77542	3.48509	0.000491977	0.00934335	Bacteria	Bacteria_none	Proteobacteria	Gammaproteobacteria	Thiotrichales	Piscirickettsiaceae	Thiomicrorhabdus	Thiomicrorhabdus frisia	Mangrove: Water	uTitan(L):uTitan(F)	Thiomicrorhabdus frisia	134	0	134
sp2329	10.5832	6.18635	1.68152	3.67901	0.000234137	0.00525507	Bacteria	Bacteria_none	Firmicutes	Negativicutes	Selenomonadales	Selenomonadaceae	Selenomonas	Selenomonas ruminantium	Mangrove: Water	uTitan(L):uTitan(F)	Selenomonas ruminantium	137	0	137
sp2230	10.5723	6.18487	1.68494	3.67067	0.000241913	0.00537532	Bacteria	Bacteria_none	Bacteroidota	Flavobacteriia	Flavobacteriales	Flavobacteriaceae	Flavobacterium	Flavobacterium lotistagni	Mangrove: Water	uTitan(L):uTitan(F)	Flavobacterium lotistagni	137	0	137
sp2881	9.51767	6.17689	1.83954	3.35784	0.000785546	0.00957175	Bacteria	Bacteria_none	Proteobacteria	Gammaproteobacteria	Thiotrichales	Piscirickettsiaceae	Thiomicrorhabdus	Thiomicrorhabdus sediminis	Mangrove: Sediment	uTitan(L):Qiagen	Thiomicrorhabdus sediminis	111	0	111
sp2724	9.43993	6.16503	1.91747	3.21519	0.00130358	0.0143226	Bacteria	Bacteria_none	Proteobacteria	Alphaproteobacteria	Hyphomicrobiales	Rhizobiaceae	Rhizobium	Rhizobium cremeum	Mangrove: Sediment	uTitan(L):Qiagen	Rhizobium cremeum	109	0	109
sp979	10.4057	6.16201	1.69312	3.63945	0.000273226	0.00578198	Bacteria	Bacteria_none	Actinobacteria	Actinomycetia	Micrococcales	Micrococcaceae	Arthrobacter	Arthrobacter psychrolactophilus	Mangrove: Water	uTitan(L):uTitan(F)	Arthrobacter psychrolactophilus	135	0	135
sp2894	9.49178	6.16093	1.62448	3.79256	0.000149103	0.00173209	Bacteria	Bacteria_none	Tenericutes	Mollicutes	Anaeroplasmatales	Anaeroplasmataceae	Asteroleplasma	Asteroleplasma anaerobium	Mangrove: Water	uTitan(L):Qiagen	Asteroleplasma anaerobium	113	0	113
sp2287	10.3286	6.1509	1.7436	3.52771	0.000419174	0.00824253	Bacteria	Bacteria_none	Proteobacteria	Gammaproteobacteria	Alteromonadales	Alteromonadaceae	Aestuariibacter	Aestuariibacter halophilus	Mangrove: Water	uTitan(L):uTitan(F)	Aestuariibacter halophilus	132	0	132
sp2764	9.41702	6.14851	1.63302	3.76511	0.000166475	0.00188867	Bacteria	Bacteria_none	Cyanobacteria	Cyanobacteria_Incertae_sedis	Thermostichales	Thermostichaceae	Thermostichus	Thermostichus lividus	Mangrove: Water	uTitan(L):Qiagen	Thermostichus lividus	109	0	109
sp1738	9.39023	6.14484	1.60493	3.82874	0.000128803	0.00157825	Bacteria	Bacteria_none	Cyanobacteria	Cyanobacteria_Incertae_sedis	Nostocales	Nostocaceae	Minunostoc	Minunostoc cylindricum	Mangrove: Water	uTitan(L):Qiagen	Minunostoc cylindricum	110	0	110
sp3276	9.2932	6.141	1.89378	3.24272	0.00118393	0.0131202	Bacteria	Bacteria_none	Proteobacteria	Gammaproteobacteria	Oceanospirillales	Halomonadaceae	Cobetia	Cobetia marina	Mangrove: Sediment	uTitan(L):Qiagen	Cobetia marina	101	0	101
sp2250	9.28885	6.14053	1.87376	3.27711	0.00104874	0.0120422	Bacteria	Bacteria_none	Proteobacteria	Betaproteobacteria	Burkholderiales	Comamonadaceae	Comamonas	Comamonas aquatica	Mangrove: Sediment	uTitan(L):Qiagen	Comamonas aquatica	102	0	102
sp2078	9.35764	6.13993	1.60463	3.82638	0.00013004	0.00157825	Bacteria	Bacteria_none	Proteobacteria	Gammaproteobacteria	Alteromonadales	Alteromonadaceae	Alteromonas	Alteromonas portus	Mangrove: Water	uTitan(L):Qiagen	Alteromonas portus	110	0	110
sp2301	9.3439	6.13754	1.6094	3.81356	0.000136978	0.00162035	Bacteria	Bacteria_none	Proteobacteria	Deltaproteobacteria	Desulfobacterales	Desulfobulbaceae	Desulfobulbus	Desulfobulbus rhabdoformis	Mangrove: Water	uTitan(L):Qiagen	Desulfobulbus rhabdoformis	109	0	109
sp3102	9.26743	6.13703	1.94978	3.14754	0.00164649	0.0168081	Bacteria	Bacteria_none	Actinobacteria	Actinomycetia	Streptomycetales	Streptomycetaceae	Streptomyces	Streptomyces prasinopilosus	Mangrove: Sediment	uTitan(L):Qiagen	Streptomyces prasinopilosus	100	0	100
sp1889	9.30882	6.13224	1.60792	3.81377	0.000136861	0.00162035	Bacteria	Bacteria_none	Proteobacteria	Alphaproteobacteria	Rhodobacterales	Rhodobacteraceae	Rhodovulum	Rhodovulum robiginosum	Mangrove: Water	uTitan(L):Qiagen	Rhodovulum robiginosum	109	0	109
sp1500	9.28933	6.12965	1.62449	3.77328	0.000161116	0.00186051	Bacteria	Bacteria_none	Firmicutes	Bacilli	Bacillales	Thermoactinomycetaceae	Shimazuella	Shimazuella alba	Mangrove: Water	uTitan(L):Qiagen	Shimazuella alba	110	0	110
sp2443	9.19466	6.12659	1.85632	3.30039	0.000965499	0.0112321	Bacteria	Bacteria_none	Proteobacteria	Gammaproteobacteria	Oceanospirillales	Halomonadaceae	Salinicola	Salinicola halophilus	Mangrove: Sediment	uTitan(L):Qiagen	Salinicola halophilus	105	0	105
sp1788	10.1246	6.12241	1.69932	3.60286	0.000314731	0.00653582	Bacteria	Bacteria_none	Bacteroidota	Flavobacteriia	Flavobacteriales	Flavobacteriaceae	Tenacibaculum	Tenacibaculum dicentrarchi	Mangrove: Water	uTitan(L):uTitan(F)	Tenacibaculum dicentrarchi	131	0	131
sp2350	9.2424	6.12184	1.62431	3.76888	0.000163984	0.00188242	Bacteria	Bacteria_none	Firmicutes	Clostridia	Eubacteriales	Lachnospiraceae	Tyzzerella	[Clostridium] colinum	Mangrove: Water	uTitan(L):Qiagen	[Clostridium] colinum	108	0	108
sp373	9.22686	6.11981	1.74408	3.50889	0.000449976	0.0043867	Bacteria	Bacteria_none	Proteobacteria	Gammaproteobacteria	Oceanospirillales	Oceanospirillaceae	Marinomonas	Marinomonas ushuaiensis	Mangrove: Water	uTitan(L):Qiagen	Marinomonas ushuaiensis	109	0	109
sp2421	9.99347	6.10374	1.71044	3.56853	0.000358995	0.00718637	Bacteria	Bacteria_none	Bacteroidota	Flavobacteriia	Flavobacteriales	Flavobacteriaceae	Aquimarina	Aquimarina addita	Mangrove: Water	uTitan(L):uTitan(F)	Aquimarina addita	130	0	130
sp969	9.0182	6.09967	1.86404	3.27227	0.00106686	0.0121367	Bacteria	Bacteria_none	Proteobacteria	Gammaproteobacteria	Vibrionales	Vibrionaceae	Vibrio	Vibrio hispanicus	Mangrove: Sediment	uTitan(L):Qiagen	Vibrio hispanicus	107	0	107
sp1635	9.9632	6.09943	1.77722	3.43201	0.00059912	0.0108231	Bacteria	Bacteria_none	Proteobacteria	Gammaproteobacteria	Pseudomonadales	Pseudomonadaceae	Pseudomonas	Pseudomonas oleovorans	Mangrove: Water	uTitan(L):uTitan(F)	Pseudomonas oleovorans	130	0	130
sp2428	9.03065	6.08821	1.62526	3.74598	0.000179689	0.00201501	Bacteria	Bacteria_none	Deinococcus-Thermus	Deinococci	Thermales	Thermaceae	Calidithermus	Calidithermus roseus	Mangrove: Water	uTitan(L):Qiagen	Calidithermus roseus	105	0	105
sp1488	9.86084	6.08443	1.70914	3.55993	0.000370951	0.00735941	Bacteria	Bacteria_none	Chloroflexi	Ktedonobacteria	Ktedonobacterales	Ktedonobacteraceae	Ktedonospora	Ktedonospora formicarum	Mangrove: Water	uTitan(L):uTitan(F)	Ktedonospora formicarum	128	0	128
sp2271	8.93269	6.0841	1.91746	3.17299	0.00150877	0.0159631	Bacteria	Bacteria_none	Proteobacteria	Gammaproteobacteria	Oceanospirillales	Oceanospirillaceae	Marinobacterium	Marinobacterium boryeongense	Mangrove: Sediment	uTitan(L):Qiagen	Marinobacterium boryeongense	98	0	98
sp2744	8.87897	6.07576	1.87355	3.24292	0.0011831	0.0131202	Bacteria	Bacteria_none	Proteobacteria	Gammaproteobacteria	Methylococcales	Methylococcaceae	Methylomicrobium	Methylomicrobium agile	Mangrove: Sediment	uTitan(L):Qiagen	Methylomicrobium agile	99	0	99
sp1546	8.83347	6.07006	1.87013	3.24579	0.00117126	0.0131202	Bacteria	Bacteria_none	Proteobacteria	Gammaproteobacteria	Alteromonadales	Alteromonadaceae	Agaribacter	Agaribacter flavus	Mangrove: Sediment	uTitan(L):Qiagen	Agaribacter flavus	106	0	106
sp2000	8.90039	6.06709	1.64231	3.69424	0.000220548	0.00236389	Bacteria	Bacteria_none	Proteobacteria	Deltaproteobacteria	Desulfovibrionales	Desulfohalobiaceae	Desulfonatronospira	Desulfonatronospira sulfatiphila	Mangrove: Water	uTitan(L):Qiagen	Desulfonatronospira sulfatiphila	103	0	103
sp1445	9.73474	6.066	1.74403	3.47815	0.000504892	0.00943776	Bacteria	Bacteria_none	Bacteroidota	Saprospiria	Saprospirales	Lewinellaceae	Neolewinella	Neolewinella persica	Mangrove: Water	uTitan(L):uTitan(F)	Neolewinella persica	127	0	127
sp2559	8.7669	6.05703	1.89393	3.19813	0.0013832	0.0150051	Bacteria	Bacteria_none	Proteobacteria	Gammaproteobacteria	Vibrionales	Vibrionaceae	Vibrio	Vibrio aphrogenes	Mangrove: Sediment	uTitan(L):Qiagen	Vibrio aphrogenes	96	0	96
sp2378	9.65901	6.05452	1.7241	3.51169	0.000445266	0.00852915	Bacteria	Bacteria_none	Bacteroidota	Flavobacteriia	Flavobacteriales	Flavobacteriaceae	Seonamhaeicola	Seonamhaeicola acroporae	Mangrove: Water	uTitan(L):uTitan(F)	Seonamhaeicola acroporae	125	0	125
sp1011	9.57265	6.04119	1.76813	3.4167	0.000633841	0.0111777	Bacteria	Bacteria_none	Bacteroidota	Flavobacteriia	Flavobacteriales	Flavobacteriaceae	Muricauda	Muricauda nanhaiensis	Mangrove: Water	uTitan(L):uTitan(F)	Muricauda nanhaiensis	122	0	122
sp983	8.72818	6.03927	1.65381	3.65173	0.000260482	0.002743	Bacteria	Bacteria_none	Cyanobacteria	Cyanobacteria_Incertae_sedis	Chroococcidiopsidales	Chroococcidiopsidaceae	Haliplanktos	Haliplanktos anthonyquinnii	Mangrove: Water	uTitan(L):Qiagen	Haliplanktos anthonyquinnii	102	0	102
sp2592	8.62129	6.03272	1.92628	3.13179	0.00173742	0.0175863	Bacteria	Bacteria_none	Proteobacteria	Gammaproteobacteria	Pseudomonadales	Pseudomonadaceae	Entomomonas	Entomomonas asaccharolytica	Mangrove: Sediment	uTitan(L):Qiagen	Entomomonas asaccharolytica	94	0	94
sp955	9.48866	6.02888	1.73351	3.47786	0.000505443	0.00943776	Bacteria	Bacteria_none	Cyanobacteria	Cyanobacteria_Incertae_sedis	Oscillatoriales	Sirenicapillariaceae	Sirenicapillaria	Sirenicapillaria stauglerae	Mangrove: Water	uTitan(L):uTitan(F)	Sirenicapillaria stauglerae	123	0	123
sp714	9.42821	6.02004	1.74	3.4598	0.000540571	0.00992686	Bacteria	Bacteria_none	Proteobacteria	Gammaproteobacteria	Oceanospirillales	Halomonadaceae	Halomonas	Halomonas alkaliphila	Mangrove: Water	uTitan(L):uTitan(F)	Halomonas alkaliphila	124	0	124
sp2503	8.54439	6.01976	1.91263	3.14737	0.00164747	0.0168081	Bacteria	Bacteria_none	Proteobacteria	Alphaproteobacteria	Rhodospirillales	Acetobacteraceae	Acidisphaera	Acidisphaera rubrifaciens	Mangrove: Sediment	uTitan(L):Qiagen	Acidisphaera rubrifaciens	93	0	93
sp2852	8.60947	6.01965	1.64713	3.65463	0.000257557	0.002743	Bacteria	Bacteria_none	Bacteroidota	Cytophagia	Cytophagales	Fulvivirgaceae	Xanthovirga	Xanthovirga aplysinae	Mangrove: Water	uTitan(L):Qiagen	Xanthovirga aplysinae	101	0	101
sp2367	9.35727	6.00893	1.73079	3.47178	0.000517022	0.00957351	Bacteria	Bacteria_none	Proteobacteria	Epsilonproteobacteria	Campylobacterales	Campylobacteraceae	Campylobacter	Campylobacter massiliensis	Mangrove: Water	uTitan(L):uTitan(F)	Campylobacter massiliensis	122	0	122
sp3564	8.44958	5.99313	2.14631	2.79229	0.0052337	0.0288448	Bacteria	Bacteria_none	Firmicutes	Clostridia	Eubacteriales	Lachnospiraceae	Lachnoclostridium	[Clostridium] fimetarium	Mangrove: Water	uTitan(L):Qiagen	[Clostridium] fimetarium	102	0	102
sp2331	9.20365	5.98525	1.74635	3.42729	0.000609635	0.0108804	Bacteria	Bacteria_none	Firmicutes	Bacilli	Lactobacillales	Lactobacillaceae	Companilactobacillus	Companilactobacillus paralimentarius	Mangrove: Water	uTitan(L):uTitan(F)	Companilactobacillus paralimentarius	121	0	121
sp1293	8.40415	5.9846	1.66245	3.59987	0.00031838	0.00330298	Bacteria	Bacteria_none	Proteobacteria	Alphaproteobacteria	Hyphomicrobiales	Rhizobiaceae	Ensifer	Ensifer numidicus	Mangrove: Water	uTitan(L):Qiagen	Ensifer numidicus	98	0	98
sp2859	9.16227	5.97842	1.75117	3.41396	0.000640249	0.0112018	Bacteria	Bacteria_none	Proteobacteria	Alphaproteobacteria	Rhodobacterales	Rhodobacteraceae	Fuscibacter	Fuscibacter oryzae	Mangrove: Water	uTitan(L):uTitan(F)	Fuscibacter oryzae	119	0	119
sp2800	8.36473	5.97797	1.67669	3.56533	0.000363396	0.00369104	Bacteria	Bacteria_none	Proteobacteria	Gammaproteobacteria	Alteromonadales	Alteromonadaceae	Paraglaciecola	Paraglaciecola aquimarina	Mangrove: Water	uTitan(L):Qiagen	Paraglaciecola aquimarina	98	0	98
sp1687	8.3608	5.97696	1.68118	3.55522	0.000377664	0.00381598	Bacteria	Bacteria_none	Proteobacteria	Deltaproteobacteria	Desulfobacterales	Desulfobacteraceae	Desulfobacter	Desulfobacter curvatus	Mangrove: Water	uTitan(L):Qiagen	Desulfobacter curvatus	97	0	97
sp804	9.15452	5.97659	1.77397	3.36904	0.000754302	0.012602	Bacteria	Bacteria_none	Bacteroidota	Bacteroidia	Marinilabiliales	Prolixibacteraceae	Mariniphaga	Mariniphaga sediminis	Mangrove: Water	uTitan(L):uTitan(F)	Mariniphaga sediminis	116	0	116
sp3034	8.34063	5.97352	2.1501	2.77825	0.00546525	0.0299508	Bacteria	Bacteria_none	Bacteroidota	Cytophagia	Cytophagales	Spirosomaceae	Larkinella	Larkinella harenae	Mangrove: Water	uTitan(L):Qiagen	Larkinella harenae	96	0	96
sp2280	9.12929	5.97334	1.76407	3.38611	0.0007089	0.0120243	Bacteria	Bacteria_none	Proteobacteria	Gammaproteobacteria	Vibrionales	Vibrionaceae	Vibrio	Vibrio tritonius	Mangrove: Water	uTitan(L):uTitan(F)	Vibrio tritonius	119	0	119
sp390	8.29487	5.96621	1.72573	3.45722	0.000545789	0.00503503	Bacteria	Bacteria_none	Cyanobacteria	Cyanobacteria_Incertae_sedis	Pseudanabaenales	Prochlorotrichaceae	Halomicronema	Halomicronema metazoicum	Mangrove: Water	uTitan(L):Qiagen	Halomicronema metazoicum	98	0	98
sp2279	9.06239	5.96247	1.74854	3.40996	0.000649713	0.0112786	Bacteria	Bacteria_none	Bacteroidota	Saprospiria	Saprospirales	Lewinellaceae	Neolewinella	Neolewinella agarilytica	Mangrove: Water	uTitan(L):uTitan(F)	Neolewinella agarilytica	117	0	117
sp1116	9.03171	5.95766	1.73114	3.44146	0.000578581	0.0105378	Bacteria	Bacteria_none	Proteobacteria	Oligoflexia	Bacteriovoracales	Bacteriovoracaceae	Bacteriovorax	Bacteriovorax stolpii	Mangrove: Water	uTitan(L):uTitan(F)	Bacteriovorax stolpii	117	0	117
sp3193	8.18877	5.94695	1.69465	3.50924	0.000449384	0.0043867	Bacteria	Bacteria_none	Proteobacteria	Alphaproteobacteria	Rhodobacterales	Roseobacteraceae	Thiosulfatihalobacter	Thiosulfatihalobacter marinus	Mangrove: Water	uTitan(L):Qiagen	Thiosulfatihalobacter marinus	95	0	95
sp2019	8.13229	5.93725	1.69102	3.51105	0.000446345	0.0043867	Bacteria	Bacteria_none	Proteobacteria	Alphaproteobacteria	Rhodospirillales	Azospirillaceae	Azospirillum	Azospirillum canadense	Mangrove: Water	uTitan(L):Qiagen	Azospirillum canadense	95	0	95
sp2317	8.11406	5.93447	1.6983	3.49435	0.000475209	0.00454141	Bacteria	Bacteria_none	Actinobacteria	Actinomycetia	Micrococcales	Microbacteriaceae	Gulosibacter	Gulosibacter sediminis	Mangrove: Water	uTitan(L):Qiagen	Gulosibacter sediminis	96	0	96
sp1462	8.04311	5.93444	1.8805	3.15578	0.0016007	0.0165943	Bacteria	Bacteria_none	Proteobacteria	Gammaproteobacteria	Nevskiales	Sinobacteraceae	Polycyclovorans	Polycyclovorans algicola	Mangrove: Sediment	uTitan(L):Qiagen	Polycyclovorans algicola	95	0	95
sp976	8.11061	5.93309	1.69522	3.4999	0.000465437	0.00451473	Bacteria	Bacteria_none	Proteobacteria	Gammaproteobacteria	Cellvibrionales	Halieaceae	Pseudohalioglobus	Pseudohalioglobus lutimaris	Mangrove: Water	uTitan(L):Qiagen	Pseudohalioglobus lutimaris	94	0	94
sp2493	8.03401	5.93235	1.90846	3.10845	0.00188071	0.0184014	Bacteria	Bacteria_none	Proteobacteria	Gammaproteobacteria	Oceanospirillales	Alcanivoracaceae	Ketobacter	Ketobacter nezhaii	Mangrove: Sediment	uTitan(L):Qiagen	Ketobacter nezhaii	93	0	93
sp3212	8.8538	5.92925	1.76971	3.3504	0.00080695	0.0131285	Bacteria	Bacteria_none	Tenericutes	Tenericutes_Incertae_sedis	Mycoplasmoidales	Mycoplasmoidaceae	Malacoplasma	Malacoplasma penetrans	Mangrove: Water	uTitan(L):uTitan(F)	Malacoplasma penetrans	116	0	116
sp3241	8.08397	5.92924	1.71548	3.45631	0.000547624	0.00503503	Bacteria	Bacteria_none	Firmicutes	Clostridia	Eubacteriales	Oscillospiraceae	Oscillibacter	Oscillibacter valericigenes	Mangrove: Water	uTitan(L):Qiagen	Oscillibacter valericigenes	96	0	96
sp2052	8.08648	5.92889	1.67714	3.53511	0.000407606	0.00407606	Bacteria	Bacteria_none	Firmicutes	Erysipelotrichia	Erysipelotrichales	Erysipelotrichaceae	Erysipelothrix	Erysipelothrix piscisicarius	Mangrove: Water	uTitan(L):Qiagen	Erysipelothrix piscisicarius	94	0	94
sp1741	8.05986	5.92503	1.69389	3.49789	0.000468961	0.00452629	Bacteria	Bacteria_none	Proteobacteria	Gammaproteobacteria	Alteromonadales	Alteromonadaceae	Alteromonas	Alteromonas confluentis	Mangrove: Water	uTitan(L):Qiagen	Alteromonas confluentis	96	0	96
sp2248	7.9773	5.9224	1.95578	3.02816	0.0024605	0.0221187	Bacteria	Bacteria_none	Proteobacteria	Alphaproteobacteria	Holosporales	Caedimonadaceae	Caedimonas	Caedimonas varicaedens	Mangrove: Sediment	uTitan(L):Qiagen	Caedimonas varicaedens	93	0	93
sp1951	8.79573	5.91947	1.74107	3.3999	0.000674115	0.0115222	Bacteria	Bacteria_none	Bacteroidota	Flavobacteriia	Flavobacteriales	Flavobacteriaceae	Flavobacterium	Flavobacterium aquimarinum	Mangrove: Water	uTitan(L):uTitan(F)	Flavobacterium aquimarinum	114	0	114
sp131	7.99487	5.91289	1.68472	3.50972	0.000448574	0.0043867	Bacteria	Bacteria_none	Proteobacteria	Gammaproteobacteria	Oceanospirillales	Halomonadaceae	Halomonas	Halomonas jeotgali	Mangrove: Water	uTitan(L):Qiagen	Halomonas jeotgali	94	0	94
sp1166	8.75991	5.91284	1.82413	3.24145	0.00118922	0.017048	Bacteria	Bacteria_none	Proteobacteria	Gammaproteobacteria	Vibrionales	Vibrionaceae	Vibrio	Vibrio vulnificus	Mangrove: Water	uTitan(L):uTitan(F)	Vibrio vulnificus	110	0	110
sp2335	7.92664	5.91247	1.9146	3.0881	0.0020144	0.0193604	Bacteria	Bacteria_none	Proteobacteria	Alphaproteobacteria	Rhodobacterales	Rhodobacteraceae	Chachezhania	Chachezhania antarctica	Mangrove: Sediment	uTitan(L):Qiagen	Chachezhania antarctica	90	0	90
sp2091	7.89351	5.90661	1.93486	3.05273	0.00226773	0.0208209	Bacteria	Bacteria_none	Proteobacteria	Epsilonproteobacteria	Campylobacterales	Arcobacteraceae	Halarcobacter	Halarcobacter anaerophilus	Mangrove: Sediment	uTitan(L):Qiagen	Halarcobacter anaerophilus	90	0	90
sp940	114.398	5.9039	1.71831	3.43588	0.000590629	0.0216814	Bacteria	Bacteria_none	Firmicutes	Bacilli	Bacillales	Staphylococcaceae	Jeotgalicoccus	Jeotgalicoccus marinus	Mangrove: Sediment	uTitan(L):uTitan(F)	Jeotgalicoccus marinus	991	25	1016
sp2342	7.87417	5.90296	1.89437	3.11605	0.0018329	0.0180551	Bacteria	Bacteria_none	Proteobacteria	Alphaproteobacteria	Sphingomonadales	Sphingomonadaceae	Novosphingobium	Novosphingobium umbonatum	Mangrove: Sediment	uTitan(L):Qiagen	Novosphingobium umbonatum	90	0	90
sp3663	7.9223	5.89965	1.69259	3.48557	0.000491091	0.0046474	Bacteria	Bacteria_none	Tenericutes	Mollicutes	Acholeplasmatales	Acholeplasmataceae	Mariniplasma	Mariniplasma anaerobium	Mangrove: Water	uTitan(L):Qiagen	Mariniplasma anaerobium	93	0	93
sp560	7.90371	5.89638	1.72686	3.4145	0.000638984	0.00576571	Bacteria	Bacteria_none	Cyanobacteria	Cyanobacteria_Incertae_sedis	Synechococcales	Synechococcales_Incertae_sedis	Metis	Metis fasciculata	Mangrove: Water	uTitan(L):Qiagen	Metis fasciculata	93	0	93
sp2438	7.90176	5.896	1.70326	3.4616	0.00053697	0.00501229	Bacteria	Bacteria_none	Proteobacteria	Alphaproteobacteria	Rhodobacterales	Rhodobacteraceae	Thalassorhabdomicrobium	Thalassorhabdomicrobium marinisediminis	Mangrove: Water	uTitan(L):Qiagen	Thalassorhabdomicrobium marinisediminis	93	0	93
sp670	7.88224	5.89255	1.69416	3.47815	0.000504879	0.00475468	Bacteria	Bacteria_none	Proteobacteria	Alphaproteobacteria	Rhodobacterales	Rhodobacteraceae	Halovulum	Halovulum marinum	Mangrove: Water	uTitan(L):Qiagen	Halovulum marinum	93	0	93
sp2693	7.88041	5.89223	1.70314	3.45963	0.00054091	0.00502088	Bacteria	Bacteria_none	Cyanobacteria	Cyanobacteria_Incertae_sedis	Spirulinales	Spirulinaceae	Spirulina	Spirulina major	Mangrove: Water	uTitan(L):Qiagen	Spirulina major	93	0	93
sp1851	7.87091	5.89013	1.71711	3.43026	0.000602994	0.00549206	Bacteria	Bacteria_none	Bacteroidota	Flavobacteriia	Flavobacteriales	Weeksellaceae	Chryseobacterium	Chryseobacterium aquifrigidense	Mangrove: Water	uTitan(L):Qiagen	Chryseobacterium aquifrigidense	92	0	92
sp619	89.4511	5.88542	1.74296	3.37668	0.000733655	0.0257055	Bacteria	Bacteria_none	Bacteroidota	Flavobacteriia	Flavobacteriales	Flavobacteriaceae	Tenacibaculum	Tenacibaculum pelagium	Mangrove: Sediment	uTitan(L):uTitan(F)	Tenacibaculum pelagium	663	22	685
sp1830	7.84618	5.88529	1.70027	3.46139	0.0005374	0.00501229	Bacteria	Bacteria_none	Proteobacteria	Alphaproteobacteria	Hyphomicrobiales	Phyllobacteriaceae	Mesorhizobium	Mesorhizobium amorphae	Mangrove: Water	uTitan(L):Qiagen	Mesorhizobium amorphae	91	0	91
sp1142	8.56738	5.88152	1.76419	3.33383	0.000856586	0.0134038	Bacteria	Bacteria_none	Proteobacteria	Alphaproteobacteria	Maricaulales	Maricaulaceae	Maricaulis	Maricaulis maris	Mangrove: Water	uTitan(L):uTitan(F)	Maricaulis maris	111	0	111
sp1343	7.80953	5.87794	1.73086	3.39597	0.000683861	0.00603041	Bacteria	Bacteria_none	Verrucomicrobia	Opitutae	Opitutales	Opitutaceae	Alterococcus	Alterococcus agarolyticus	Mangrove: Water	uTitan(L):Qiagen	Alterococcus agarolyticus	89	0	89
sp3494	7.7343	5.87735	1.92556	3.05228	0.00227108	0.0208209	Bacteria	Bacteria_none	Proteobacteria	Gammaproteobacteria	Pasteurellales	Pasteurellaceae	Frederiksenia	Frederiksenia canicola	Mangrove: Sediment	uTitan(L):Qiagen	Frederiksenia canicola	89	0	89
sp1000	8.54141	5.87722	1.7531	3.35247	0.00080094	0.0131285	Bacteria	Bacteria_none	Proteobacteria	Alphaproteobacteria	Hyphomicrobiales	Methylocystaceae	Hansschlegelia	Hansschlegelia zhihuaiae	Mangrove: Water	uTitan(L):uTitan(F)	Hansschlegelia zhihuaiae	111	0	111
sp1920	7.75379	5.86904	1.70439	3.44349	0.000574253	0.00525496	Bacteria	Bacteria_none	Firmicutes	Bacilli	Bacillales	Paenibacillaceae	Cohnella	Cohnella ferri	Mangrove: Water	uTitan(L):Qiagen	Cohnella ferri	92	0	92
sp3392	7.67369	5.86592	1.90543	3.07853	0.00208028	0.0198825	Bacteria	Bacteria_none	Proteobacteria	Gammaproteobacteria	Nevskiales	Sinobacteraceae	Solimonas	Solimonas aquatica	Mangrove: Sediment	uTitan(L):Qiagen	Solimonas aquatica	88	0	88
sp2078	8.46326	5.86396	1.75765	3.33625	0.000849173	0.0133902	Bacteria	Bacteria_none	Proteobacteria	Gammaproteobacteria	Alteromonadales	Alteromonadaceae	Alteromonas	Alteromonas portus	Mangrove: Water	uTitan(L):uTitan(F)	Alteromonas portus	110	0	110
sp1889	8.43118	5.85834	1.76088	3.32694	0.000878046	0.0136435	Bacteria	Bacteria_none	Proteobacteria	Alphaproteobacteria	Rhodobacterales	Rhodobacteraceae	Rhodovulum	Rhodovulum robiginosum	Mangrove: Water	uTitan(L):uTitan(F)	Rhodovulum robiginosum	109	0	109
sp1683	8.39635	5.85273	1.78088	3.28642	0.00101468	0.0149313	Bacteria	Bacteria_none	Bacteroidota	Flavobacteriia	Flavobacteriales	Flavobacteriaceae	Mesonia	Mesonia sediminis	Mangrove: Water	uTitan(L):uTitan(F)	Mesonia sediminis	110	0	110
sp2323	7.64798	5.84865	2.20033	2.65808	0.00785872	0.0404401	Bacteria	Bacteria_none	Proteobacteria	Alphaproteobacteria	Rhodobacterales	Rhodobacteraceae	Amylibacter	Amylibacter kogurei	Mangrove: Water	uTitan(L):Qiagen	Amylibacter kogurei	89	0	89
sp2090	7.63421	5.8464	1.75065	3.33956	0.000839114	0.00698661	Bacteria	Bacteria_none	Proteobacteria	Alphaproteobacteria	Rhodobacterales	Rhodobacteraceae	Jhaorihella	Jhaorihella thermophila	Mangrove: Water	uTitan(L):Qiagen	Jhaorihella thermophila	90	0	90
sp3218	7.57071	5.84557	1.92858	3.03102	0.00243733	0.0220647	Bacteria	Bacteria_none	Actinobacteria	Actinomycetia	Propionibacteriales	Kribbellaceae	Kribbella	Kribbella monticola	Mangrove: Sediment	uTitan(L):Qiagen	Kribbella monticola	84	0	84
sp2135	8.34361	5.84333	1.78889	3.26645	0.00108906	0.0158163	Bacteria	Bacteria_none	Proteobacteria	Epsilonproteobacteria	Campylobacterales	Sulfurovaceae	Nitratifractor	Nitratifractor salsuginis	Mangrove: Water	uTitan(L):uTitan(F)	Nitratifractor salsuginis	108	0	108
sp1483	7.60297	5.84063	1.71386	3.40789	0.000654677	0.00582603	Bacteria	Bacteria_none	Bacteroidota	Flavobacteriia	Flavobacteriales	Flavobacteriaceae	Flavobacterium	Flavobacterium notoginsengisoli	Mangrove: Water	uTitan(L):Qiagen	Flavobacterium notoginsengisoli	90	0	90
sp1932	7.58917	5.83722	1.71126	3.41106	0.000647109	0.00578583	Bacteria	Bacteria_none	Proteobacteria	Alphaproteobacteria	Rhodobacterales	Roseobacteraceae	Litoreibacter	Litoreibacter meonggei	Mangrove: Water	uTitan(L):Qiagen	Litoreibacter meonggei	88	0	88
sp1363	7.56609	5.83295	1.72775	3.37604	0.000735383	0.0063975	Bacteria	Bacteria_none	Proteobacteria	Alphaproteobacteria	Magnetococcales	Magnetococcaceae	Magnetofaba	Magnetofaba australis	Mangrove: Water	uTitan(L):Qiagen	Magnetofaba australis	88	0	88
sp3283	8.26955	5.83021	1.82776	3.18981	0.00142366	0.0188297	Bacteria	Bacteria_none	Bacteroidota	Cytophagia	Cytophagales	Hymenobacteraceae	Adhaeribacter	Adhaeribacter terreus	Mangrove: Water	uTitan(L):uTitan(F)	Adhaeribacter terreus	106	0	106
sp2091	7.54616	5.82923	1.73549	3.35883	0.000782734	0.00666761	Bacteria	Bacteria_none	Proteobacteria	Epsilonproteobacteria	Campylobacterales	Arcobacteraceae	Halarcobacter	Halarcobacter anaerophilus	Mangrove: Water	uTitan(L):Qiagen	Halarcobacter anaerophilus	88	0	88
sp1644	7.51712	5.82382	1.71846	3.38899	0.000701517	0.00615811	Bacteria	Bacteria_none	Proteobacteria	Alphaproteobacteria	Hyphomicrobiales	Phyllobacteriaceae	Salaquimonas	Salaquimonas pukyongi	Mangrove: Water	uTitan(L):Qiagen	Salaquimonas pukyongi	88	0	88
sp2957	7.5092	5.82193	1.72815	3.36888	0.000754729	0.00652855	Bacteria	Bacteria_none	Firmicutes	Bacilli	Bacillales	Paenibacillaceae	Paenibacillus	Paenibacillus populi	Mangrove: Water	uTitan(L):Qiagen	Paenibacillus populi	87	0	87
sp1959	7.48423	5.81808	1.72984	3.36337	0.000769975	0.00660952	Bacteria	Bacteria_none	Cyanobacteria	Cyanobacteria_Incertae_sedis	Oscillatoriales	Coleofasciculaceae	Marmoreocelis	Marmoreocelis xerophila	Mangrove: Water	uTitan(L):Qiagen	Marmoreocelis xerophila	89	0	89
sp2717	7.45606	5.81234	1.75036	3.32066	0.000898057	0.00738233	Bacteria	Bacteria_none	Proteobacteria	Gammaproteobacteria	Oceanospirillales	Oceanospirillaceae	Maribrevibacterium	Maribrevibacterium harenarium	Mangrove: Water	uTitan(L):Qiagen	Maribrevibacterium harenarium	88	0	88
sp2624	7.39529	5.81233	1.93881	2.99789	0.00271859	0.0236932	Bacteria	Bacteria_none	Proteobacteria	Alphaproteobacteria	Hyphomicrobiales	Tepidamorphaceae	Tepidamorphus	Tepidamorphus gemmatus	Mangrove: Sediment	uTitan(L):Qiagen	Tepidamorphus gemmatus	84	0	84
sp2428	8.16024	5.81108	1.7757	3.27255	0.00106581	0.0155804	Bacteria	Bacteria_none	Deinococcus-Thermus	Deinococci	Thermales	Thermaceae	Calidithermus	Calidithermus roseus	Mangrove: Water	uTitan(L):uTitan(F)	Calidithermus roseus	105	0	105
sp1246	7.4501	5.81081	1.72531	3.36799	0.000757177	0.00652855	Bacteria	Bacteria_none	Actinobacteria	Acidimicrobiia	Acidimicrobiales	Iamiaceae	Rhabdothermincola	Rhabdothermincola salaria	Mangrove: Water	uTitan(L):Qiagen	Rhabdothermincola salaria	87	0	87
sp2872	7.37659	5.80871	1.92807	3.0127	0.00258934	0.0229559	Bacteria	Bacteria_none	Proteobacteria	Alphaproteobacteria	Maricaulales	Maricaulaceae	Woodsholea	Woodsholea maritima	Mangrove: Sediment	uTitan(L):Qiagen	Woodsholea maritima	84	0	84
sp1187	7.43562	5.80807	1.72936	3.35852	0.000783616	0.00666761	Bacteria	Bacteria_none	Proteobacteria	Alphaproteobacteria	Rhodobacterales	Roseobacteraceae	Jannaschia	Jannaschia confluentis	Mangrove: Water	uTitan(L):Qiagen	Jannaschia confluentis	87	0	87
sp1330	7.42369	5.80625	1.73073	3.3548	0.000794221	0.00672833	Bacteria	Bacteria_none	Proteobacteria	Deltaproteobacteria	Desulfovibrionales	Desulfovibrionaceae	Maridesulfovibrio	Maridesulfovibrio bastinii	Mangrove: Water	uTitan(L):Qiagen	Maridesulfovibrio bastinii	88	0	88
sp2609	7.32244	5.79985	1.98192	2.92638	0.00342934	0.0278134	Bacteria	Bacteria_none	Proteobacteria	Gammaproteobacteria	Cellvibrionales	Microbulbiferaceae	Microbulbifer	Microbulbifer salipaludis	Mangrove: Sediment	uTitan(L):Qiagen	Microbulbifer salipaludis	90	0	90
sp2927	7.32652	5.79928	1.93718	2.99368	0.00275639	0.0238609	Bacteria	Bacteria_none	Proteobacteria	Deltaproteobacteria	Desulfovibrionales	Desulfovibrionaceae	Megalodesulfovibrio	Megalodesulfovibrio paquesii	Mangrove: Sediment	uTitan(L):Qiagen	Megalodesulfovibrio paquesii	85	0	85
sp3556	7.38451	5.79837	1.76039	3.2938	0.000988442	0.00792387	Bacteria	Bacteria_none	Proteobacteria	Gammaproteobacteria	Enterobacterales	Budviciaceae	Limnobaculum	Limnobaculum parvum	Mangrove: Water	uTitan(L):Qiagen	Limnobaculum parvum	87	0	87
sp912	7.3151	5.79658	1.93088	3.00204	0.00268178	0.0234519	Bacteria	Bacteria_none	Bacteroidota	Flavobacteriia	Flavobacteriales	Flavobacteriaceae	Flavobacterium	Flavobacterium sasangense	Mangrove: Sediment	uTitan(L):Qiagen	Flavobacterium sasangense	83	0	83
sp2525	7.37213	5.79644	1.74296	3.32562	0.000882206	0.00728289	Bacteria	Bacteria_none	Proteobacteria	Gammaproteobacteria	Chromatiales	Ectothiorhodospiraceae	Acidihalobacter	Acidihalobacter yilgarnensis	Mangrove: Water	uTitan(L):Qiagen	Acidihalobacter yilgarnensis	88	0	88
sp2915	7.36275	5.79422	1.73405	3.34143	0.000833474	0.00696957	Bacteria	Bacteria_none	Actinobacteria	Actinomycetia	Micrococcales	Microbacteriaceae	Agrococcus	Agrococcus sediminis	Mangrove: Water	uTitan(L):Qiagen	Agrococcus sediminis	87	0	87
sp1818	8.0475	5.79165	1.80458	3.20942	0.00133002	0.0180202	Bacteria	Bacteria_none	Proteobacteria	Alphaproteobacteria	Rhodobacterales	Roseobacteraceae	Rubellimicrobium	Rubellimicrobium mesophilum	Mangrove: Water	uTitan(L):uTitan(F)	Rubellimicrobium mesophilum	106	0	106
sp2000	8.04856	5.79106	1.79249	3.23073	0.00123475	0.017051	Bacteria	Bacteria_none	Proteobacteria	Deltaproteobacteria	Desulfovibrionales	Desulfohalobiaceae	Desulfonatronospira	Desulfonatronospira sulfatiphila	Mangrove: Water	uTitan(L):uTitan(F)	Desulfonatronospira sulfatiphila	103	0	103
sp1241	7.34671	5.79074	1.7328	3.34184	0.00083225	0.00696957	Bacteria	Bacteria_none	Proteobacteria	Alphaproteobacteria	Rhodospirillales	Terasakiellaceae	Terasakiella	Terasakiella brassicae	Mangrove: Water	uTitan(L):Qiagen	Terasakiella brassicae	86	0	86
sp2939	7.34374	5.78974	1.73482	3.33738	0.000845734	0.00701164	Bacteria	Bacteria_none	Firmicutes	Clostridia	Eubacteriales	Eubacteriales Family XII. Incertae Sedis	Fusibacter	Fusibacter fontis	Mangrove: Water	uTitan(L):Qiagen	Fusibacter fontis	85	0	85
sp391	8.01591	5.78529	1.79038	3.23133	0.00123217	0.017051	Bacteria	Bacteria_none	Proteobacteria	Alphaproteobacteria	Rhodospirillales	Acetobacteraceae	Entomobacter	Entomobacter blattae	Mangrove: Water	uTitan(L):uTitan(F)	Entomobacter blattae	103	0	103
sp4016	7.31692	5.78504	1.74293	3.31914	0.000902944	0.00739118	Bacteria	Bacteria_none	Proteobacteria	Gammaproteobacteria	Oceanospirillales	Oceanospirillaceae	Marinospirillum	Marinospirillum insulare	Mangrove: Water	uTitan(L):Qiagen	Marinospirillum insulare	86	0	86
sp592	161.036	5.77481	1.81906	3.1746	0.00150041	0.0159403	Bacteria	Bacteria_none	Firmicutes	Clostridia	Eubacteriales	Syntrophomonadaceae	Dethiobacter	Dethiobacter alkaliphilus	Mangrove: Sediment	uTitan(L):Qiagen	Dethiobacter alkaliphilus	1647	15	1662
sp1509	7.17774	5.7693	1.94595	2.96477	0.00302905	0.025787	Bacteria	Bacteria_none	Proteobacteria	Gammaproteobacteria	Oceanospirillales	Oceanospirillaceae	Litoribacillus	Litoribacillus peritrichatus	Mangrove: Sediment	uTitan(L):Qiagen	Litoribacillus peritrichatus	82	0	82
sp3226	7.88293	5.76135	1.78273	3.23176	0.00123032	0.017051	Bacteria	Bacteria_none	Proteobacteria	Gammaproteobacteria	Vibrionales	Vibrionaceae	Photobacterium	Photobacterium leiognathi	Mangrove: Water	uTitan(L):uTitan(F)	Photobacterium leiognathi	102	0	102
sp1919	7.13239	5.76033	1.94496	2.96168	0.00305969	0.025928	Bacteria	Bacteria_none	Proteobacteria	Alphaproteobacteria	Rhodobacterales	Rhodobacteraceae	Paracoccus	Paracoccus chinensis	Mangrove: Sediment	uTitan(L):Qiagen	Paracoccus chinensis	82	0	82
sp2002	7.87446	5.76011	1.79255	3.21336	0.00131191	0.0179942	Bacteria	Bacteria_none	Bacteroidota	Flavobacteriia	Flavobacteriales	Flavobacteriaceae	Maribacter	Maribacter orientalis	Mangrove: Water	uTitan(L):uTitan(F)	Maribacter orientalis	103	0	103
sp2649	7.87747	5.75984	1.81874	3.16694	0.0015405	0.0196724	Bacteria	Bacteria_none	Bacteroidota	Flavobacteriia	Flavobacteriales	Flavobacteriaceae	Maribacter	Maribacter thermophilus	Mangrove: Water	uTitan(L):uTitan(F)	Maribacter thermophilus	100	0	100
sp3505	7.18757	5.75954	1.74071	3.30873	0.000937199	0.00754426	Bacteria	Bacteria_none	Firmicutes	Clostridia	Eubacteriales	Eubacteriales Family XIII. Incertae Sedis	Lentihominibacter	Lentihominibacter faecis	Mangrove: Water	uTitan(L):Qiagen	Lentihominibacter faecis	85	0	85
sp1745	7.17366	5.75636	1.73585	3.31616	0.000912621	0.00743901	Bacteria	Bacteria_none	Proteobacteria	Alphaproteobacteria	Kordiimonadales	Temperatibacteraceae	Temperatibacter	Temperatibacter marinus	Mangrove: Water	uTitan(L):Qiagen	Temperatibacter marinus	84	0	84
sp1220	7.15717	5.75267	1.75644	3.27518	0.00105594	0.00836135	Bacteria	Bacteria_none	Proteobacteria	Gammaproteobacteria	Oceanospirillales	Oceanospirillales_Incertae_sedis	Pelagibaculum	Pelagibaculum spongiae	Mangrove: Water	uTitan(L):Qiagen	Pelagibaculum spongiae	83	0	83
sp356	7.833	5.75262	1.81247	3.17391	0.00150402	0.0194298	Bacteria	Bacteria_none	Chloroflexi	Chloroflexia	Chloroflexales	Roseiflexaceae	Roseiflexus	Roseiflexus castenholzii	Mangrove: Water	uTitan(L):uTitan(F)	Roseiflexus castenholzii	103	0	103
sp2460	7.83395	5.75228	1.81037	3.1774	0.00148602	0.0194231	Bacteria	Bacteria_none	Proteobacteria	Deltaproteobacteria	Desulfobacterales	Desulfobulbaceae	Desulfomarina	Desulfomarina profundi	Mangrove: Water	uTitan(L):uTitan(F)	Desulfomarina profundi	101	0	101
sp3486	7.06442	5.74524	1.98843	2.88934	0.00386051	0.030446	Bacteria	Bacteria_none	Bacteroidota	Bacteroidia	Bacteroidales	Bacteroidaceae	Phocaeicola	Phocaeicola sartorii	Mangrove: Sediment	uTitan(L):Qiagen	Phocaeicola sartorii	77	0	77
sp2489	7.1002	5.74189	1.74886	3.28322	0.00102628	0.00819335	Bacteria	Bacteria_none	Proteobacteria	Gammaproteobacteria	Pseudomonadales	Pseudomonadaceae	Pseudomonas	Pseudomonas saponiphila	Mangrove: Water	uTitan(L):Qiagen	Pseudomonas saponiphila	84	0	84
sp3414	7.09536	5.74095	1.75192	3.27695	0.00104934	0.00834313	Bacteria	Bacteria_none	Proteobacteria	Zetaproteobacteria	Zetaproteobacteria_Incertae_sedis	Zetaproteobacteria_Incertae_sedis_Incertae_sedis	Ghiorsea	Ghiorsea bivora	Mangrove: Water	uTitan(L):Qiagen	Ghiorsea bivora	84	0	84
sp1495	7.09969	5.74089	1.75443	3.27222	0.00106705	0.00841497	Bacteria	Bacteria_none	Proteobacteria	Gammaproteobacteria	Oceanospirillales	Alcanivoracaceae	Ketobacter	Ketobacter alkanivorans	Mangrove: Water	uTitan(L):Qiagen	Ketobacter alkanivorans	82	0	82
sp1189	7.0319	5.73959	1.95137	2.94131	0.00326827	0.0268711	Bacteria	Bacteria_none	Proteobacteria	Alphaproteobacteria	Rhodobacterales	Rhodobacteraceae	Paracoccus	Paracoccus caeni	Mangrove: Sediment	uTitan(L):Qiagen	Paracoccus caeni	80	0	80
sp2083	7.01437	5.73575	1.95386	2.9356	0.00332901	0.027085	Bacteria	Bacteria_none	Proteobacteria	Alphaproteobacteria	Hyphomicrobiales	Parvibaculaceae	Tepidicaulis	Tepidicaulis marinus	Mangrove: Sediment	uTitan(L):Qiagen	Tepidicaulis marinus	79	0	79
sp1436	7.73904	5.73503	1.79409	3.19661	0.00139051	0.0186471	Bacteria	Bacteria_none	Actinobacteria	Actinomycetia	Streptomycetales	Streptomycetaceae	Streptomyces	Streptomyces bangladeshensis	Mangrove: Water	uTitan(L):uTitan(F)	Streptomyces bangladeshensis	101	0	101
sp3721	7.01392	5.73479	2.02133	2.83714	0.00455195	0.0346244	Bacteria	Bacteria_none	Proteobacteria	Gammaproteobacteria	Legionellales	Legionellaceae	Legionella	Legionella adelaidensis	Mangrove: Sediment	uTitan(L):Qiagen	Legionella adelaidensis	76	0	76
sp2417	7.06473	5.73394	1.75637	3.26465	0.00109598	0.00857339	Bacteria	Bacteria_none	Proteobacteria	Alphaproteobacteria	Rhodobacterales	Roseobacteraceae	Sagittula	Sagittula stellata	Mangrove: Water	uTitan(L):Qiagen	Sagittula stellata	82	0	82
sp1750	7.02207	5.72548	1.78775	3.20262	0.00136182	0.0101223	Bacteria	Bacteria_none	Cyanobacteria	Cyanobacteria_Incertae_sedis	Chroococcidiopsidales	Chroococcidiopsidaceae	Chroococcidiopsis	Chroococcidiopsis thermalis	Mangrove: Water	uTitan(L):Qiagen	Chroococcidiopsis thermalis	82	0	82
sp1302	7.67665	5.7233	1.82856	3.12995	0.00174836	0.0221992	Bacteria	Bacteria_none	Verrucomicrobia	Verrucomicrobiae	Verrucomicrobiales	Verrucomicrobiaceae	Luteolibacter	Luteolibacter arcticus	Mangrove: Water	uTitan(L):uTitan(F)	Luteolibacter arcticus	100	0	100
sp2439	7.65029	5.71814	1.79505	3.1855	0.00144505	0.0189995	Bacteria	Bacteria_none	Actinobacteria	Actinomycetia	Propionibacteriales	Propionibacteriaceae	Acidipropionibacterium	Acidipropionibacterium microaerophilum	Mangrove: Water	uTitan(L):uTitan(F)	Acidipropionibacterium microaerophilum	99	0	99
sp3010	7.64561	5.71727	1.80108	3.17436	0.00150169	0.0194298	Bacteria	Bacteria_none	Proteobacteria	Alphaproteobacteria	Rhodobacterales	Rhodobacteraceae	Gemmobacter	Gemmobacter megaterium	Mangrove: Water	uTitan(L):uTitan(F)	Gemmobacter megaterium	99	0	99
sp1395	6.97894	5.7168	1.76118	3.246	0.00117038	0.00904595	Bacteria	Bacteria_none	Armatimonadetes	Fimbriimonadia	Fimbriimonadales	Fimbriimonadaceae	Fimbriimonas	Fimbriimonas ginsengisoli	Mangrove: Water	uTitan(L):Qiagen	Fimbriimonas ginsengisoli	82	0	82
sp2601	7.63419	5.71517	1.80367	3.16864	0.00153153	0.0196709	Bacteria	Bacteria_none	Bacteroidota	Flavobacteriia	Flavobacteriales	Flavobacteriaceae	Tenacibaculum	Tenacibaculum litopenaei	Mangrove: Water	uTitan(L):uTitan(F)	Tenacibaculum litopenaei	99	0	99
sp2425	6.95611	5.71172	1.79592	3.18038	0.00147081	0.010727	Bacteria	Bacteria_none	Proteobacteria	Alphaproteobacteria	Rhodobacterales	Rhodobacteraceae	Pseudaestuariivita	Pseudaestuariivita atlantica	Mangrove: Water	uTitan(L):Qiagen	Pseudaestuariivita atlantica	81	0	81
sp1849	6.93961	5.70838	1.755	3.25263	0.00114342	0.00887293	Bacteria	Bacteria_none	Proteobacteria	Alphaproteobacteria	Hyphomicrobiales	Methylobacteriaceae	Methylorubrum	Methylorubrum rhodinum	Mangrove: Water	uTitan(L):Qiagen	Methylorubrum rhodinum	81	0	81
sp2025	7.60006	5.70825	1.83314	3.11392	0.00184619	0.0230463	Bacteria	Bacteria_none	Bacteroidota	Flavobacteriia	Flavobacteriales	Flavobacteriaceae	Flavobacterium	Flavobacterium solisilvae	Mangrove: Water	uTitan(L):uTitan(F)	Flavobacterium solisilvae	97	0	97
sp917	7.57063	5.70303	1.8264	3.12256	0.00179286	0.022634	Bacteria	Bacteria_none	Verrucomicrobia	Verrucomicrobiae	Verrucomicrobiales	Verrucomicrobiaceae	Phragmitibacter	Phragmitibacter flavus	Mangrove: Water	uTitan(L):uTitan(F)	Phragmitibacter flavus	98	0	98
sp1080	6.87284	5.69481	1.76161	3.23274	0.00122611	0.00943907	Bacteria	Bacteria_none	Cyanobacteria	Cyanobacteria_Incertae_sedis	Oscillatoriales	Microcoleaceae	Planktothricoides	Candidatus Planktothricoides rosea	Mangrove: Water	uTitan(L):Qiagen	Candidatus Planktothricoides rosea	81	0	81
sp2945	6.83983	5.68803	1.76666	3.21964	0.00128349	0.00972648	Bacteria	Bacteria_none	Firmicutes	Clostridia	Eubacteriales	Oscillospiraceae	Ruminococcus	Ruminococcus callidus	Mangrove: Water	uTitan(L):Qiagen	Ruminococcus callidus	81	0	81
sp3401	6.83918	5.6879	1.78143	3.19288	0.00140864	0.0103907	Bacteria	Bacteria_none	Firmicutes	Bacilli	Bacillales	Alicyclobacillaceae	Effusibacillus	Effusibacillus lacus	Mangrove: Water	uTitan(L):Qiagen	Effusibacillus lacus	81	0	81
sp3518	6.83239	5.68603	1.76132	3.22828	0.00124536	0.00950075	Bacteria	Bacteria_none	Proteobacteria	Gammaproteobacteria	Alteromonadales	Shewanellaceae	Shewanella	Shewanella avicenniae	Mangrove: Water	uTitan(L):Qiagen	Shewanella avicenniae	80	0	80
sp145	6.81892	5.68374	1.78098	3.19135	0.00141612	0.0104063	Bacteria	Bacteria_none	Bacteroidota	Bacteroidota_Incertae_sedis	Bacteroidetes Order II. Incertae sedis	Rhodothermaceae	Rhodocaloribacter	Rhodocaloribacter litoris	Mangrove: Water	uTitan(L):Qiagen	Rhodocaloribacter litoris	81	0	81
sp1991	6.78304	5.67587	1.7821	3.18494	0.00144785	0.0105993	Bacteria	Bacteria_none	Proteobacteria	Gammaproteobacteria	Cellvibrionales	Cellvibrionaceae	Gilvimarinus	Gilvimarinus polysaccharolyticus	Mangrove: Water	uTitan(L):Qiagen	Gilvimarinus polysaccharolyticus	80	0	80
sp3419	6.69698	5.6708	1.98198	2.86118	0.00422069	0.0326849	Bacteria	Bacteria_none	Proteobacteria	Alphaproteobacteria	Sphingomonadales	Erythrobacteraceae	Altererythrobacter	Altererythrobacter xiamenensis	Mangrove: Sediment	uTitan(L):Qiagen	Altererythrobacter xiamenensis	81	0	81
sp461	6.7376	5.66593	1.76868	3.20349	0.00135774	0.0101223	Bacteria	Bacteria_none	Proteobacteria	Alphaproteobacteria	Rhodobacterales	Rhodobacteraceae	Histidinibacterium	Histidinibacterium aquaticum	Mangrove: Water	uTitan(L):Qiagen	Histidinibacterium aquaticum	79	0	79
sp2019	7.34424	5.65924	1.83397	3.08579	0.00203012	0.0249222	Bacteria	Bacteria_none	Proteobacteria	Alphaproteobacteria	Rhodospirillales	Azospirillaceae	Azospirillum	Azospirillum canadense	Mangrove: Water	uTitan(L):uTitan(F)	Azospirillum canadense	95	0	95
sp2282	7.33784	5.6583	1.82156	3.1063	0.00189447	0.0235168	Bacteria	Bacteria_none	Bacteroidota	Flavobacteriia	Flavobacteriales	Crocinitomicaceae	Brumimicrobium	Brumimicrobium aurantiacum	Mangrove: Water	uTitan(L):uTitan(F)	Brumimicrobium aurantiacum	96	0	96
sp1609	7.3348	5.65741	1.81275	3.1209	0.00180298	0.022634	Bacteria	Bacteria_none	Proteobacteria	Alphaproteobacteria	Kordiimonadales	Kordiimonadaceae	Eilatimonas	Eilatimonas milleporae	Mangrove: Water	uTitan(L):uTitan(F)	Eilatimonas milleporae	95	0	95
sp3725	6.63957	5.65741	1.9996	2.82926	0.00466552	0.0352563	Bacteria	Bacteria_none	Proteobacteria	Alphaproteobacteria	Sphingomonadales	Erythrobacteraceae	Altericroceibacterium	Altericroceibacterium spongiae	Mangrove: Sediment	uTitan(L):Qiagen	Altericroceibacterium spongiae	77	0	77
sp1620	6.66678	5.65109	1.78926	3.15833	0.00158677	0.0114012	Bacteria	Bacteria_none	Proteobacteria	Gammaproteobacteria	Chromatiales	Ectothiorhodospiraceae	Thiorhodospira	Thiorhodospira sibirica	Mangrove: Water	uTitan(L):Qiagen	Thiorhodospira sibirica	79	0	79
sp224	7.27792	5.64641	1.8228	3.09765	0.00195062	0.0240793	Bacteria	Bacteria_none	Proteobacteria	Deltaproteobacteria	Myxococcales	Nannocystaceae	Plesiocystis	Plesiocystis pacifica	Mangrove: Water	uTitan(L):uTitan(F)	Plesiocystis pacifica	95	0	95
sp1557	6.64083	5.64515	1.80271	3.13148	0.00173929	0.0121375	Bacteria	Bacteria_none	Firmicutes	Clostridia	Eubacteriales	Clostridiaceae	Clostridium	Clostridium sardiniense	Mangrove: Water	uTitan(L):Qiagen	Clostridium sardiniense	78	0	78
sp2576	6.63984	5.64493	1.79878	3.13819	0.00169992	0.0119922	Bacteria	Bacteria_none	Cyanobacteria	Cyanobacteria_Incertae_sedis	Synechococcales	Synechococcales_Incertae_sedis	Cymatolege	Cymatolege isodiametrica	Mangrove: Water	uTitan(L):Qiagen	Cymatolege isodiametrica	78	0	78
sp2469	6.60544	5.63665	1.79983	3.13177	0.00173758	0.0121375	Bacteria	Bacteria_none	Proteobacteria	Alphaproteobacteria	Hyphomicrobiales	Aurantimonadaceae	Aureimonas	Aureimonas phyllosphaerae	Mangrove: Water	uTitan(L):Qiagen	Aureimonas phyllosphaerae	76	0	76
sp2384	6.5927	5.63491	1.78499	3.15683	0.00159496	0.0114178	Bacteria	Bacteria_none	Proteobacteria	Gammaproteobacteria	Oceanospirillales	Halomonadaceae	Modicisalibacter	Modicisalibacter tunisiensis	Mangrove: Water	uTitan(L):Qiagen	Modicisalibacter tunisiensis	78	0	78
sp2834	6.58927	5.63369	1.78095	3.16331	0.00155988	0.0112497	Bacteria	Bacteria_none	Proteobacteria	Gammaproteobacteria	Pseudomonadales	Pseudomonadaceae	Pseudomonas	Pseudomonas daroniae	Mangrove: Water	uTitan(L):Qiagen	Pseudomonas daroniae	77	0	77
sp2148	6.5855	5.63288	1.78059	3.1635	0.00155886	0.0112497	Bacteria	Bacteria_none	Proteobacteria	Alphaproteobacteria	Hyphomicrobiales	Methylobacteriaceae	Methylobacterium	Methylobacterium gnaphalii	Mangrove: Water	uTitan(L):Qiagen	Methylobacterium gnaphalii	77	0	77
sp3050	6.58344	5.63243	1.79217	3.1428	0.00167343	0.0118918	Bacteria	Bacteria_none	Cyanobacteria	Cyanobacteria_Incertae_sedis	Nostocales	Nostocaceae	Neowollea	Neowollea manoromense	Mangrove: Water	uTitan(L):Qiagen	Neowollea manoromense	77	0	77
sp3663	7.17976	5.62659	1.83341	3.06891	0.0021484	0.0260022	Bacteria	Bacteria_none	Tenericutes	Mollicutes	Acholeplasmatales	Acholeplasmataceae	Mariniplasma	Mariniplasma anaerobium	Mangrove: Water	uTitan(L):uTitan(F)	Mariniplasma anaerobium	93	0	93
sp2438	7.17236	5.62513	1.84445	3.04975	0.00229029	0.0273604	Bacteria	Bacteria_none	Proteobacteria	Alphaproteobacteria	Rhodobacterales	Rhodobacteraceae	Thalassorhabdomicrobium	Thalassorhabdomicrobium marinisediminis	Mangrove: Water	uTitan(L):uTitan(F)	Thalassorhabdomicrobium marinisediminis	93	0	93
sp2236	6.49644	5.62472	2.0064	2.80339	0.00505689	0.0374677	Bacteria	Bacteria_none	Proteobacteria	Gammaproteobacteria	Thiotrichales	Piscirickettsiaceae	Piscirickettsia	Piscirickettsia salmonis	Mangrove: Sediment	uTitan(L):Qiagen	Piscirickettsia salmonis	72	0	72
sp1771	7.15555	5.62182	1.85526	3.03021	0.00244386	0.0287315	Bacteria	Bacteria_none	Firmicutes	Clostridia	Eubacteriales	Clostridiales Family XVII. Incertae Sedis	Thermaerobacter	Thermaerobacter subterraneus	Mangrove: Water	uTitan(L):uTitan(F)	Thermaerobacter subterraneus	93	0	93
sp2081	6.46974	5.61923	1.98843	2.82596	0.00471384	0.0353332	Bacteria	Bacteria_none	Proteobacteria	Alphaproteobacteria	Sphingomonadales	Sphingomonadaceae	Sphingomonas	'Sphingomonas ginsengisoli' Hoang et al. 2012	Mangrove: Sediment	uTitan(L):Qiagen	'Sphingomonas ginsengisoli' Hoang et al. 2012	73	0	73
sp1214	7.12232	5.61491	1.84312	3.04641	0.00231592	0.0275186	Bacteria	Bacteria_none	Bacteroidota	Flavobacteriia	Flavobacteriales	Flavobacteriaceae	Muricauda	Muricauda marina	Mangrove: Water	uTitan(L):uTitan(F)	Muricauda marina	92	0	92
sp863	7.11941	5.61466	1.82993	3.06825	0.00215319	0.0260022	Bacteria	Bacteria_none	Chloroflexi	Ardenticatenia	Ardenticatenales	Ardenticatenaceae	Ardenticatena	Ardenticatena maritima	Mangrove: Water	uTitan(L):uTitan(F)	Ardenticatena maritima	93	0	93
sp3144	6.43189	5.611	2.00818	2.79407	0.00520493	0.0382339	Bacteria	Bacteria_none	Proteobacteria	Gammaproteobacteria	Aeromonadales	Succinivibrionaceae	Ruminobacter	Ruminobacter amylophilus	Mangrove: Sediment	uTitan(L):Qiagen	Ruminobacter amylophilus	73	0	73
sp1721	6.47593	5.60882	1.78805	3.13683	0.00170785	0.0120045	Bacteria	Bacteria_none	Proteobacteria	Alphaproteobacteria	Hyphomicrobiales	Phyllobacteriaceae	Aquamicrobium	Aquamicrobium soli	Mangrove: Water	uTitan(L):Qiagen	Aquamicrobium soli	76	0	76
sp2465	6.44706	5.60204	1.79581	3.11951	0.00181154	0.0125964	Bacteria	Bacteria_none	Proteobacteria	Alphaproteobacteria	Rhodospirillales	Azospirillaceae	Azospirillum	Azospirillum halopraeferens	Mangrove: Water	uTitan(L):Qiagen	Azospirillum halopraeferens	75	0	75
sp1697	6.43129	5.59911	1.8062	3.09994	0.00193558	0.0133631	Bacteria	Bacteria_none	Proteobacteria	Alphaproteobacteria	Hyphomicrobiales	Parvibaculaceae	Parvibaculum	Parvibaculum sedimenti	Mangrove: Water	uTitan(L):Qiagen	Parvibaculum sedimenti	76	0	76
sp1343	7.0293	5.5954	1.87146	2.98987	0.00279099	0.031803	Bacteria	Bacteria_none	Verrucomicrobia	Opitutae	Opitutales	Opitutaceae	Alterococcus	Alterococcus agarolyticus	Mangrove: Water	uTitan(L):uTitan(F)	Alterococcus agarolyticus	89	0	89
sp2404	6.40647	5.59366	1.81155	3.08778	0.00201657	0.0137269	Bacteria	Bacteria_none	Proteobacteria	Alphaproteobacteria	Hyphomicrobiales	Rhizobiaceae	Rhizobium	Rhizobium qilianshanense	Mangrove: Water	uTitan(L):Qiagen	Rhizobium qilianshanense	76	0	76
sp395	6.99464	5.58902	1.85563	3.01193	0.0025959	0.0300422	Bacteria	Bacteria_none	Proteobacteria	Deltaproteobacteria	Desulfovibrionales	Desulfovibrionaceae	Desulfovibrio	Desulfovibrio subterraneus	Mangrove: Water	uTitan(L):uTitan(F)	Desulfovibrio subterraneus	91	0	91
sp104	6.37873	5.58706	1.80682	3.09221	0.00198674	0.0136676	Bacteria	Bacteria_none	Actinobacteria	Actinomycetia	Streptomycetales	Streptomycetaceae	Streptomyces	Streptomyces omiyaensis	Mangrove: Water	uTitan(L):Qiagen	Streptomyces omiyaensis	75	0	75
sp1032	6.32136	5.57387	1.80346	3.09066	0.00199715	0.0136704	Bacteria	Bacteria_none	Proteobacteria	Gammaproteobacteria	Cellvibrionales	Cellvibrionaceae	Teredinibacter	Teredinibacter waterburyi	Mangrove: Water	uTitan(L):Qiagen	Teredinibacter waterburyi	74	0	74
sp1138	6.27774	5.56414	1.82017	3.05694	0.00223612	0.0150106	Bacteria	Bacteria_none	Proteobacteria	Alphaproteobacteria	Rhodospirillales	Thalassobaculaceae	Nisaea	Nisaea nitritireducens	Mangrove: Water	uTitan(L):Qiagen	Nisaea nitritireducens	74	0	74
sp2804	6.26375	5.56098	1.8607	2.98864	0.00280219	0.0176502	Bacteria	Bacteria_none	Proteobacteria	Gammaproteobacteria	Vibrionales	Vibrionaceae	Vibrio	Vibrio albus	Mangrove: Water	uTitan(L):Qiagen	Vibrio albus	74	0	74
sp2273	6.24835	5.55703	1.82168	3.0505	0.00228461	0.0151401	Bacteria	Bacteria_none	Proteobacteria	Alphaproteobacteria	Hyphomicrobiales	Ahrensiaceae	Pseudahrensia	Pseudahrensia aquimaris	Mangrove: Water	uTitan(L):Qiagen	Pseudahrensia aquimaris	73	0	73
sp2906	6.23515	5.55407	1.81149	3.06602	0.00216928	0.0146635	Bacteria	Bacteria_none	Cyanobacteria	Cyanobacteria_Incertae_sedis	Oscillatoriales	Microcoleaceae	Planktothricoides	Planktothricoides raciborskii	Mangrove: Water	uTitan(L):Qiagen	Planktothricoides raciborskii	73	0	73
sp132	6.19895	5.54589	1.81613	3.05368	0.0022605	0.01507	Bacteria	Bacteria_none	Fibrobacteres	Chitinispirillia	Chitinispirillales	Chitinispirillaceae	Chitinispirillum	Chitinispirillum alkaliphilum	Mangrove: Water	uTitan(L):Qiagen	Chitinispirillum alkaliphilum	73	0	73
sp2377	6.78785	5.54563	1.85957	2.98222	0.00286171	0.0321147	Bacteria	Bacteria_none	Proteobacteria	Gammaproteobacteria	Vibrionales	Vibrionaceae	Vibrio	Vibrio variabilis	Mangrove: Water	uTitan(L):uTitan(F)	Vibrio variabilis	88	0	88
sp3148	6.19569	5.54517	1.86089	2.97985	0.00288386	0.0179812	Bacteria	Bacteria_none	Tenericutes	Mollicutes	Mycoplasmatales	Mycoplasmataceae	Mycoplasmopsis	Mycoplasmopsis adleri	Mangrove: Water	uTitan(L):Qiagen	Mycoplasmopsis adleri	73	0	73
sp3303	6.19651	5.54431	1.85238	2.99308	0.00276178	0.0175667	Bacteria	Bacteria_none	Proteobacteria	Gammaproteobacteria	Vibrionales	Vibrionaceae	Grimontia	Grimontia indica	Mangrove: Water	uTitan(L):Qiagen	Grimontia indica	71	0	71
sp1835	6.19334	5.54409	1.82101	3.04452	0.00233055	0.0153263	Bacteria	Bacteria_none	Proteobacteria	Alphaproteobacteria	Hyphomicrobiales	Devosiaceae	Devosia	Devosia humi	Mangrove: Water	uTitan(L):Qiagen	Devosia humi	72	0	72
sp1324	6.771	5.54211	1.85583	2.98632	0.00282354	0.0320097	Bacteria	Bacteria_none	Bacteroidota	Flavobacteriia	Flavobacteriales	Flavobacteriaceae	Croceivirga	Croceivirga lutea	Mangrove: Water	uTitan(L):uTitan(F)	Croceivirga lutea	88	0	88
sp3352	6.75851	5.53953	1.92848	2.87249	0.00407252	0.0420891	Bacteria	Bacteria_none	Proteobacteria	Epsilonproteobacteria	Campylobacterales	Arcobacteraceae	Arcobacter	Arcobacter vandammei	Mangrove: Water	uTitan(L):uTitan(F)	Arcobacter vandammei	88	0	88
sp408	6.15626	5.53565	1.83362	3.01897	0.00253638	0.0165676	Bacteria	Bacteria_none	Proteobacteria	Gammaproteobacteria	Thiotrichales	Fastidiosibacteraceae	Facilibium	Facilibium subflavum	Mangrove: Water	uTitan(L):Qiagen	Facilibium subflavum	72	0	72
sp2780	6.1536	5.53505	1.82683	3.02987	0.00244656	0.0160349	Bacteria	Bacteria_none	Proteobacteria	Gammaproteobacteria	Thiotrichales	Thiotrichaceae	Leucothrix	Leucothrix mucor	Mangrove: Water	uTitan(L):Qiagen	Leucothrix mucor	72	0	72
sp2886	6.73041	5.53295	1.86565	2.9657	0.00301994	0.0335515	Bacteria	Bacteria_none	Bacteroidota	Flavobacteriia	Flavobacteriales	Flavobacteriaceae	Winogradskyella	Winogradskyella poriferorum	Mangrove: Water	uTitan(L):uTitan(F)	Winogradskyella poriferorum	86	0	86
sp3038	6.05649	5.51163	1.83688	3.00054	0.00269501	0.0173123	Bacteria	Bacteria_none	Proteobacteria	Gammaproteobacteria	Vibrionales	Vibrionaceae	Vibrio	Vibrio ruber	Mangrove: Water	uTitan(L):Qiagen	Vibrio ruber	70	0	70
sp2144	6.05501	5.5113	1.84206	2.99192	0.00277227	0.0175687	Bacteria	Bacteria_none	Proteobacteria	Gammaproteobacteria	Oceanospirillales	Halomonadaceae	Halomonas	Halomonas titanicae	Mangrove: Water	uTitan(L):Qiagen	Halomonas titanicae	70	0	70
sp4016	6.62073	5.50974	1.87743	2.93473	0.00333835	0.0358349	Bacteria	Bacteria_none	Proteobacteria	Gammaproteobacteria	Oceanospirillales	Oceanospirillaceae	Marinospirillum	Marinospirillum insulare	Mangrove: Water	uTitan(L):uTitan(F)	Marinospirillum insulare	86	0	86
sp887	6.617	5.50926	1.88352	2.92499	0.00344471	0.0366227	Bacteria	Bacteria_none	Proteobacteria	Alphaproteobacteria	Rhodospirillales	Rhodospirillaceae	Phaeovibrio	Phaeovibrio sulfidiphilus	Mangrove: Water	uTitan(L):uTitan(F)	Phaeovibrio sulfidiphilus	87	0	87
sp2939	6.61418	5.50798	1.86902	2.94699	0.00320885	0.0353595	Bacteria	Bacteria_none	Firmicutes	Clostridia	Eubacteriales	Eubacteriales Family XII. Incertae Sedis	Fusibacter	Fusibacter fontis	Mangrove: Water	uTitan(L):uTitan(F)	Fusibacter fontis	85	0	85
sp1311	6.58412	5.5019	1.87047	2.94145	0.00326676	0.0353637	Bacteria	Bacteria_none	Proteobacteria	Gammaproteobacteria	Oceanospirillales	Oceanospirillaceae	Neptunomonas	Neptunomonas naphthovorans	Mangrove: Water	uTitan(L):uTitan(F)	Neptunomonas naphthovorans	86	0	86
sp1949	6.00868	5.49997	1.86174	2.95421	0.00313467	0.0191838	Bacteria	Bacteria_none	Proteobacteria	Alphaproteobacteria	Rhodobacterales	Rhodobacteraceae	Rhodosalinus	Rhodosalinus halophilus	Mangrove: Water	uTitan(L):Qiagen	Rhodosalinus halophilus	69	0	69
sp1285	6.57187	5.49856	1.87837	2.92731	0.00341912	0.0365254	Bacteria	Bacteria_none	Proteobacteria	Gammaproteobacteria	Alteromonadales	Alteromonadaceae	Glaciecola	Glaciecola punicea	Mangrove: Water	uTitan(L):uTitan(F)	Glaciecola punicea	84	0	84
sp2322	6.56715	5.49825	1.86799	2.9434	0.00324633	0.0353595	Bacteria	Bacteria_none	Bacteroidota	Flavobacteriia	Flavobacteriales	Flavobacteriaceae	Lacinutrix	Lacinutrix gracilariae	Mangrove: Water	uTitan(L):uTitan(F)	Lacinutrix gracilariae	86	0	86
sp2663	5.98532	5.49503	1.83329	2.99735	0.00272338	0.0174368	Bacteria	Bacteria_none	Cyanobacteria	Cyanobacteria_Incertae_sedis	Cyanobacteria_Incertae_sedis_Incertae_sedis	Cyanobacteria_Incertae_sedis_Incertae_sedis_Incertae_sedis	Adonisia	Adonisia turfae	Mangrove: Water	uTitan(L):Qiagen	Adonisia turfae	70	0	70
sp2630	5.97919	5.4936	1.84383	2.97944	0.00288772	0.0179812	Bacteria	Bacteria_none	Proteobacteria	Gammaproteobacteria	Oceanospirillales	Oceanospirillaceae	Profundimonas	Profundimonas piezophila	Mangrove: Water	uTitan(L):Qiagen	Profundimonas piezophila	70	0	70
sp876	5.96293	5.48923	1.85202	2.96391	0.00303758	0.0186484	Bacteria	Bacteria_none	Firmicutes	Clostridia	Eubacteriales	Clostridiaceae	Clostridium	Clostridium manihotivorum	Mangrove: Water	uTitan(L):Qiagen	Clostridium manihotivorum	69	0	69
sp58	5.95819	5.48864	1.84244	2.97901	0.00289182	0.0179812	Bacteria	Bacteria_none	Balneolaeota	Balneolia	Balneolales	Balneolaceae	Gracilimonas	Gracilimonas tropica	Mangrove: Water	uTitan(L):Qiagen	Gracilimonas tropica	70	0	70
sp14	6.52077	5.48789	1.86641	2.94034	0.00327854	0.0353637	Bacteria	Bacteria_none	Balneolaeota	Balneolia	Balneolales	Balneolaceae	Halalkalibaculum	Halalkalibaculum roseum	Mangrove: Water	uTitan(L):uTitan(F)	Halalkalibaculum roseum	85	0	85
sp1034	5.9271	5.48131	1.84478	2.97125	0.00296593	0.0183831	Bacteria	Bacteria_none	Firmicutes	Clostridia	Halanaerobiales	Halobacteroidaceae	Acetohalobium	Acetohalobium arabaticum	Mangrove: Water	uTitan(L):Qiagen	Acetohalobium arabaticum	70	0	70
sp2592	5.89923	5.47414	1.84408	2.96849	0.00299267	0.0184775	Bacteria	Bacteria_none	Proteobacteria	Gammaproteobacteria	Pseudomonadales	Pseudomonadaceae	Entomomonas	Entomomonas asaccharolytica	Mangrove: Water	uTitan(L):Qiagen	Entomomonas asaccharolytica	69	0	69
sp3414	6.43183	5.46814	1.88354	2.90312	0.00369468	0.038908	Bacteria	Bacteria_none	Proteobacteria	Zetaproteobacteria	Zetaproteobacteria_Incertae_sedis	Zetaproteobacteria_Incertae_sedis_Incertae_sedis	Ghiorsea	Ghiorsea bivora	Mangrove: Water	uTitan(L):uTitan(F)	Ghiorsea bivora	84	0	84
sp2997	5.85533	5.46363	1.8561	2.94361	0.00324406	0.0197288	Bacteria	Bacteria_none	Cyanobacteria	Cyanobacteria_Incertae_sedis	Chroococcidiopsidales	Chroococcidiopsidaceae	Chroococcidiopsis	Chroococcidiopsis lichenoides	Mangrove: Water	uTitan(L):Qiagen	Chroococcidiopsis lichenoides	69	0	69
sp3458	5.84738	5.46173	1.8524	2.94847	0.00319353	0.0194825	Bacteria	Bacteria_none	Proteobacteria	Alphaproteobacteria	Rhodobacterales	Rhodobacteraceae	Paracoccus	Paracoccus sordidisoli	Mangrove: Water	uTitan(L):Qiagen	Paracoccus sordidisoli	69	0	69
sp2417	6.38981	5.45814	1.88759	2.8916	0.00383284	0.0399839	Bacteria	Bacteria_none	Proteobacteria	Alphaproteobacteria	Rhodobacterales	Roseobacteraceae	Sagittula	Sagittula stellata	Mangrove: Water	uTitan(L):uTitan(F)	Sagittula stellata	82	0	82
sp3069	5.79984	5.44914	1.86597	2.92027	0.00349733	0.0208764	Bacteria	Bacteria_none	Bacteroidota	Flavobacteriia	Flavobacteriales	Flavobacteriaceae	Croceitalea	Croceitalea eckloniae	Mangrove: Water	uTitan(L):Qiagen	Croceitalea eckloniae	67	0	67
sp2407	5.78737	5.44668	1.8566	2.93369	0.00334959	0.0202436	Bacteria	Bacteria_none	Bacteroidota	Flavobacteriia	Flavobacteriales	Flavobacteriaceae	Flavicella	Flavicella marina	Mangrove: Water	uTitan(L):Qiagen	Flavicella marina	68	0	68
sp2234	6.33086	5.44505	1.88038	2.89572	0.00378294	0.0396495	Bacteria	Bacteria_none	Firmicutes	Bacilli	Lactobacillales	Lactobacillaceae	Periweissella	Periweissella cryptocerci	Mangrove: Water	uTitan(L):uTitan(F)	Periweissella cryptocerci	82	0	82
sp2049	6.3306	5.44463	1.90492	2.85819	0.00426062	0.0432427	Bacteria	Bacteria_none	Cyanobacteria	Cyanobacteria_Incertae_sedis	Oscillatoriales	Microcoleaceae	Sodalinema	Sodalinema stali	Mangrove: Water	uTitan(L):uTitan(F)	Sodalinema stali	81	0	81
sp684	5.77242	5.44306	1.85716	2.93086	0.00338028	0.0203657	Bacteria	Bacteria_none	Proteobacteria	Deltaproteobacteria	Desulfobacterales	Desulfobacteraceae	Desulfonema	Desulfonema limicola	Mangrove: Water	uTitan(L):Qiagen	Desulfonema limicola	68	0	68
sp2129	5.74858	5.43724	1.86384	2.91722	0.00353164	0.0210165	Bacteria	Bacteria_none	Proteobacteria	Alphaproteobacteria	Hyphomicrobiales	Notoacmeibacteraceae	Notoacmeibacter	Notoacmeibacter ruber	Mangrove: Water	uTitan(L):Qiagen	Notoacmeibacter ruber	68	0	68
sp647	6.28687	5.43448	1.90999	2.84529	0.00443708	0.0446118	Bacteria	Bacteria_none	Bacteroidota	Flavobacteriia	Flavobacteriales	Flavobacteriaceae	Gilvibacter	Gilvibacter sediminis	Mangrove: Water	uTitan(L):uTitan(F)	Gilvibacter sediminis	80	0	80
sp2945	6.20736	5.41686	1.89527	2.85809	0.004262	0.0432427	Bacteria	Bacteria_none	Firmicutes	Clostridia	Eubacteriales	Oscillospiraceae	Ruminococcus	Ruminococcus callidus	Mangrove: Water	uTitan(L):uTitan(F)	Ruminococcus callidus	81	0	81
sp1080	6.20519	5.41636	1.88993	2.86591	0.00415811	0.0427746	Bacteria	Bacteria_none	Cyanobacteria	Cyanobacteria_Incertae_sedis	Oscillatoriales	Microcoleaceae	Planktothricoides	Candidatus Planktothricoides rosea	Mangrove: Water	uTitan(L):uTitan(F)	Candidatus Planktothricoides rosea	81	0	81
sp2655	5.66543	5.41622	1.87316	2.89149	0.00383421	0.0225405	Bacteria	Bacteria_none	Bacteroidota	Flavobacteriia	Flavobacteriales	Flavobacteriaceae	Psychroflexus	Psychroflexus torquis	Mangrove: Water	uTitan(L):Qiagen	Psychroflexus torquis	67	0	67
sp362	415.838	5.41557	1.47633	3.66827	0.000244202	0.0040506	Bacteria	Bacteria_none	Firmicutes	Clostridia	Eubacteriales	Oscillospiraceae	Lawsonibacter	Lawsonibacter asaccharolyticus	Mangrove: Sediment	uTitan(L):Qiagen	Lawsonibacter asaccharolyticus	4217	51	4268
sp3518	6.16761	5.4074	1.88882	2.86285	0.00419849	0.042991	Bacteria	Bacteria_none	Proteobacteria	Gammaproteobacteria	Alteromonadales	Shewanellaceae	Shewanella	Shewanella avicenniae	Mangrove: Water	uTitan(L):uTitan(F)	Shewanella avicenniae	80	0	80
sp3443	5.61114	5.40211	1.87253	2.88493	0.00391499	0.0229459	Bacteria	Bacteria_none	Proteobacteria	Alphaproteobacteria	Rhodobacterales	Rhodobacteraceae	Albirhodobacter	Albirhodobacter confluentis	Mangrove: Water	uTitan(L):Qiagen	Albirhodobacter confluentis	66	0	66
sp3814	5.60943	5.40169	1.87427	2.88203	0.00395124	0.0230886	Bacteria	Bacteria_none	Firmicutes	Bacilli	Lactobacillales	Aerococcaceae	Dolosicoccus	Dolosicoccus paucivorans	Mangrove: Water	uTitan(L):Qiagen	Dolosicoccus paucivorans	66	0	66
sp1489	5.60735	5.40058	1.87851	2.87492	0.00404131	0.023544	Bacteria	Bacteria_none	Proteobacteria	Gammaproteobacteria	Cellvibrionales	Cellvibrionaceae	Marinimicrobium	Marinimicrobium locisalis	Mangrove: Water	uTitan(L):Qiagen	Marinimicrobium locisalis	65	0	65
sp460	6.12946	5.39827	1.89836	2.84364	0.00446011	0.0446413	Bacteria	Bacteria_none	Proteobacteria	Alphaproteobacteria	Rhodobacterales	Roseobacteraceae	Celeribacter	Celeribacter indicus	Mangrove: Water	uTitan(L):uTitan(F)	Celeribacter indicus	79	0	79
sp2415	6.11622	5.39559	1.90652	2.83007	0.00465384	0.0457559	Bacteria	Bacteria_none	Bacteroidota	Flavobacteriia	Flavobacteriales	Flavobacteriaceae	Lacinutrix	Lacinutrix himadriensis	Mangrove: Water	uTitan(L):uTitan(F)	Lacinutrix himadriensis	80	0	80
sp1386	5.57704	5.39295	1.88232	2.86506	0.00416932	0.024217	Bacteria	Bacteria_none	Proteobacteria	Epsilonproteobacteria	Campylobacterales	Arcobacteraceae	Malaciobacter	Malaciobacter mytili	Mangrove: Water	uTitan(L):Qiagen	Malaciobacter mytili	65	0	65
sp381	5.55185	5.3866	1.88101	2.86367	0.00418762	0.0242507	Bacteria	Bacteria_none	Proteobacteria	Alphaproteobacteria	Rhodospirillales	Rhodospirillaceae	Ferruginivarius	Ferruginivarius sediminum	Mangrove: Water	uTitan(L):Qiagen	Ferruginivarius sediminum	65	0	65
sp1616	6.07494	5.38526	1.90629	2.82499	0.00472818	0.0458778	Bacteria	Bacteria_none	Bacteroidota	Flavobacteriia	Flavobacteriales	Flavobacteriaceae	Winogradskyella	Winogradskyella haliclonae	Mangrove: Water	uTitan(L):uTitan(F)	Winogradskyella haliclonae	78	0	78
sp1266	6.05726	5.38114	1.90288	2.8279	0.00468546	0.0458638	Bacteria	Bacteria_none	Proteobacteria	Gammaproteobacteria	Vibrionales	Vibrionaceae	Vibrio	Vibrio neptunius	Mangrove: Water	uTitan(L):uTitan(F)	Vibrio neptunius	78	0	78
sp1371	5.51316	5.3768	1.89686	2.83459	0.0045885	0.0260283	Bacteria	Bacteria_none	Proteobacteria	Alphaproteobacteria	Sphingomonadales	Sphingomonadaceae	Sphingosinithalassobacter	Sphingosinithalassobacter tenebrarum	Mangrove: Water	uTitan(L):Qiagen	Sphingosinithalassobacter tenebrarum	65	0	65
sp2236	5.48409	5.36936	1.89567	2.83244	0.00461941	0.0261272	Bacteria	Bacteria_none	Proteobacteria	Gammaproteobacteria	Thiotrichales	Piscirickettsiaceae	Piscirickettsia	Piscirickettsia salmonis	Mangrove: Water	uTitan(L):Qiagen	Piscirickettsia salmonis	65	0	65
sp1953	5.45952	5.36246	1.88845	2.8396	0.004517	0.0256979	Bacteria	Bacteria_none	Proteobacteria	Gammaproteobacteria	Vibrionales	Vibrionaceae	Vibrio	Vibrio orientalis	Mangrove: Water	uTitan(L):Qiagen	Vibrio orientalis	64	0	64
sp2834	5.96286	5.35856	1.90562	2.81197	0.00492388	0.047569	Bacteria	Bacteria_none	Proteobacteria	Gammaproteobacteria	Pseudomonadales	Pseudomonadaceae	Pseudomonas	Pseudomonas daroniae	Mangrove: Water	uTitan(L):uTitan(F)	Pseudomonas daroniae	77	0	77
sp2382	5.42157	5.35209	1.91172	2.79962	0.00511634	0.0283591	Bacteria	Bacteria_none	Proteobacteria	Gammaproteobacteria	Oceanospirillales	Endozoicomonadaceae	Endozoicomonas	Endozoicomonas montiporae	Mangrove: Water	uTitan(L):Qiagen	Endozoicomonas montiporae	63	0	63
sp2400	5.29417	5.31807	1.91867	2.77175	0.00557554	0.0304691	Bacteria	Bacteria_none	Firmicutes	Clostridia	Eubacteriales	Lachnospiraceae	Syntrophococcus	Syntrophococcus sucromutans	Mangrove: Water	uTitan(L):Qiagen	Syntrophococcus sucromutans	62	0	62
sp1708	5.27558	5.31312	1.92183	2.76462	0.005699	0.0310564	Bacteria	Bacteria_none	Proteobacteria	Gammaproteobacteria	Cellvibrionales	Cellvibrionaceae	Marinimicrobium	Marinimicrobium koreense	Mangrove: Water	uTitan(L):Qiagen	Marinimicrobium koreense	62	0	62
sp2956	5.26921	5.31144	1.92433	2.76015	0.00577742	0.0313078	Bacteria	Bacteria_none	Actinobacteria	Thermoleophilia	Miltoncostaeales	Miltoncostaeaceae	Miltoncostaea	Miltoncostaea oceani	Mangrove: Water	uTitan(L):Qiagen	Miltoncostaea oceani	62	0	62
sp2050	5.20809	5.29441	1.91712	2.76165	0.00575105	0.0312522	Bacteria	Bacteria_none	Proteobacteria	Gammaproteobacteria	Cellvibrionales	Cellvibrionaceae	Saccharophagus	Saccharophagus degradans	Mangrove: Water	uTitan(L):Qiagen	Saccharophagus degradans	61	0	61
sp3565	5.19412	5.29066	1.94378	2.72184	0.00649188	0.0341307	Bacteria	Bacteria_none	Proteobacteria	Alphaproteobacteria	Rhodobacterales	Rhodobacteraceae	Aliishimia	Aliishimia ponticola	Mangrove: Water	uTitan(L):Qiagen	Aliishimia ponticola	61	0	61
sp3166	5.14244	5.27595	1.93029	2.73323	0.00627156	0.0332427	Bacteria	Bacteria_none	Proteobacteria	Alphaproteobacteria	Rhodobacterales	Roseobacteraceae	Thalassobius	Thalassobius mangrovi	Mangrove: Water	uTitan(L):Qiagen	Thalassobius mangrovi	60	0	60
sp1176	103.326	5.27558	1.60722	3.28244	0.00102914	0.0334521	Bacteria	Bacteria_none	Proteobacteria	Deltaproteobacteria	Desulfovibrionales	Desulfovibrionaceae	Oceanidesulfovibrio	Oceanidesulfovibrio marinus	Mangrove: Sediment	uTitan(L):uTitan(F)	Oceanidesulfovibrio marinus	936	38	974
sp2186	5.09169	5.26204	1.93166	2.7241	0.00644767	0.034083	Bacteria	Bacteria_none	Actinobacteria	Actinomycetia	Streptosporangiales	Streptosporangiaceae	Thermobispora	Thermobispora bispora	Mangrove: Water	uTitan(L):Qiagen	Thermobispora bispora	60	0	60
sp975	5.06918	5.25517	1.94378	2.70358	0.0068597	0.0357737	Bacteria	Bacteria_none	Proteobacteria	Alphaproteobacteria	Rhodobacterales	Roseobacteraceae	Roseivivax	Roseivivax marinus	Mangrove: Water	uTitan(L):Qiagen	Roseivivax marinus	59	0	59
sp1577	5.0527	5.25059	1.94438	2.70039	0.00692592	0.0360222	Bacteria	Bacteria_none	Proteobacteria	Alphaproteobacteria	Rhodobacterales	Roseobacteraceae	Roseivivax	Roseivivax halodurans	Mangrove: Water	uTitan(L):Qiagen	Roseivivax halodurans	59	0	59
sp3786	4.92859	5.21501	1.9628	2.65692	0.0078857	0.0404716	Bacteria	Bacteria_none	Firmicutes	Clostridia	Eubacteriales	Eubacteriales Family XII. Incertae Sedis	Fusibacter	Fusibacter bizertensis	Mangrove: Water	uTitan(L):Qiagen	Fusibacter bizertensis	58	0	58
sp1422	4.88918	5.20308	1.96416	2.649	0.00807294	0.0411063	Bacteria	Bacteria_none	Bacteroidota	Cytophagia	Cytophagales	Roseivirgaceae	Roseivirga	Roseivirga pacifica	Mangrove: Water	uTitan(L):Qiagen	Roseivirga pacifica	57	0	57
sp2808	4.88725	5.2025	1.95925	2.65536	0.0079224	0.0405526	Bacteria	Bacteria_none	Proteobacteria	Alphaproteobacteria	Rhodobacterales	Rhodobacteraceae	Pseudooceanicola	Pseudooceanicola nanhaiensis	Mangrove: Water	uTitan(L):Qiagen	Pseudooceanicola nanhaiensis	57	0	57
sp3864	4.876	5.19927	1.9647	2.64634	0.00813682	0.0413231	Bacteria	Bacteria_none	Proteobacteria	Gammaproteobacteria	Vibrionales	Vibrionaceae	Vibrio	Vibrio chagasii	Mangrove: Water	uTitan(L):Qiagen	Vibrio chagasii	57	0	57
sp2683	4.84433	5.19013	1.96683	2.63883	0.00831919	0.042139	Bacteria	Bacteria_none	Proteobacteria	Alphaproteobacteria	Hyphomicrobiales	Aurantimonadaceae	Jiella	Jiella sonneratiae	Mangrove: Water	uTitan(L):Qiagen	Jiella sonneratiae	57	0	57
sp3247	4.79162	5.17408	1.97301	2.62243	0.00873041	0.0439922	Bacteria	Bacteria_none	Actinobacteria	Actinomycetia	Micrococcales	Cellulomonadaceae	Pseudactinotalea	Pseudactinotalea suaedae	Mangrove: Water	uTitan(L):Qiagen	Pseudactinotalea suaedae	56	0	56
sp579	4.76106	5.16439	1.98634	2.59996	0.00932354	0.0466177	Bacteria	Bacteria_none	Balneolaeota	Balneolia	Balneolales	Balneolaceae	Balneola	Balneola vulgaris	Mangrove: Water	uTitan(L):Qiagen	Balneola vulgaris	55	0	55
sp727	74.0777	5.16172	1.66085	3.10788	0.00188434	0.0184014	Bacteria	Bacteria_none	Proteobacteria	Gammaproteobacteria	Alteromonadales	Shewanellaceae	Shewanella	Shewanella decolorationis	Mangrove: Sediment	uTitan(L):Qiagen	Shewanella decolorationis	782	11	793
sp271	65.6813	5.15814	1.37997	3.73786	0.000185593	0.00425143	Bacteria	Bacteria_none	Bacteroidota	Flavobacteriia	Flavobacteriales	Flavobacteriaceae	Nonlabens	Nonlabens xiamenensis	Mangrove: Water	uTitan(L):uTitan(F)	Nonlabens xiamenensis	833	11	844
sp768	4.69404	5.14379	2.00091	2.57072	0.0101486	0.0499703	Bacteria	Bacteria_none	Bacteroidota	Flavobacteriia	Flavobacteriales	Flavobacteriaceae	Lutibacter	Lutibacter crassostreae	Mangrove: Water	uTitan(L):Qiagen	Lutibacter crassostreae	54	0	54
sp2976	4.63276	5.12533	1.99321	2.5714	0.0101288	0.0499703	Bacteria	Bacteria_none	Firmicutes	Clostridia	Eubacteriales	Eubacteriaceae	Eubacterium	Eubacterium multiforme	Mangrove: Water	uTitan(L):Qiagen	Eubacterium multiforme	54	0	54
sp895	71.4318	5.11801	1.70503	3.00172	0.00268462	0.0173028	Bacteria	Bacteria_none	Cyanobacteria	Cyanobacteria_Incertae_sedis	Oscillatoriales	Oscillatoriales_Incertae_sedis	Potamolinea	Potamolinea magna	Mangrove: Water	uTitan(L):Qiagen	Potamolinea magna	801	12	813
sp566	137.828	4.90978	1.77587	2.76472	0.00569724	0.0406878	Bacteria	Bacteria_none	Firmicutes	Clostridia	Eubacteriales	Lachnospiraceae	Lachnoanaerobaculum	Lachnoanaerobaculum gingivalis	Mangrove: Sediment	uTitan(L):Qiagen	Lachnoanaerobaculum gingivalis	1412	23	1435
sp1794	45.5443	4.82196	1.51778	3.17699	0.00148814	0.0186683	Bacteria	Bacteria_none	Cyanobacteria	Cyanobacteria_Incertae_sedis	Oscillatoriales	Oscillatoriaceae	Tenebriella	Tenebriella amphibia	Coral-W	uTitan(L):uTitan(F)	Tenebriella amphibia	124	11	135
sp13	67.1151	4.75745	1.03358	4.60288	4.17E-06	9.29E-05	Bacteria	Bacteria_none	Proteobacteria	Alphaproteobacteria	Rhodobacterales	Rhodobacteraceae	Frigidibacter	Frigidibacter oleivorans	Mangrove: Water	uTitan(L):Qiagen	Frigidibacter oleivorans	761	12	773
sp266	230.32	4.69645	1.40545	3.34159	0.000832988	0.00696957	Bacteria	Bacteria_none	Proteobacteria	Gammaproteobacteria	Oceanospirillales	Endozoicomonadaceae	Parendozoicomonas	Parendozoicomonas haliclonae	Mangrove: Water	uTitan(L):Qiagen	Parendozoicomonas haliclonae	2617	44	2661
sp507	110.009	4.68224	1.71159	2.73562	0.00622636	0.0439779	Bacteria	Bacteria_none	Bacteroidota	Flavobacteriia	Flavobacteriales	Flavobacteriaceae	Polaribacter	Polaribacter atrinae	Mangrove: Sediment	uTitan(L):Qiagen	Polaribacter atrinae	1201	23	1224
sp803	77.6751	4.59847	1.65053	2.78606	0.0053353	0.0387487	Bacteria	Bacteria_none	Proteobacteria	Alphaproteobacteria	Rhodospirillales	Thalassobaculaceae	Oceanibaculum	Oceanibaculum pacificum	Mangrove: Sediment	uTitan(L):Qiagen	Oceanibaculum pacificum	806	16	822
sp210	429.871	4.53231	1.31904	3.43608	0.000590204	0.00774191	Bacteria	Bacteria_none	Bacteroidota	Flavobacteriia	Flavobacteriales	Flavobacteriaceae	Tenacibaculum	Tenacibaculum caenipelagi	Mangrove: Sediment	uTitan(L):Qiagen	Tenacibaculum caenipelagi	4652	98	4750
sp1003	370.291	4.39266	0.516589	8.50319	1.84E-17	4.07E-15	Bacteria	Bacteria_none	Cyanobacteria	Cyanobacteria_Incertae_sedis	Oscillatoriales	Oscillatoriaceae	Tenebriella	Tenebriella curviceps	Coral-W	uTitan(L):uTitan(F)	Tenebriella curviceps	973	109	1082
sp719	165.772	4.28657	1.53788	2.78732	0.00531463	0.038708	Bacteria	Bacteria_none	Firmicutes	Clostridia	Thermoanaerobacterales	Thermodesulfobiaceae	Thermodesulfobium	Thermodesulfobium narugense	Mangrove: Sediment	uTitan(L):Qiagen	Thermodesulfobium narugense	1645	47	1692
sp770	103.336	4.20492	0.809468	5.19467	2.05E-07	7.10E-06	Bacteria	Bacteria_none	Cyanobacteria	Cyanobacteria_Incertae_sedis	Pseudanabaenales	Oculatellaceae	Komarkovaea	Komarkovaea angustata	Mangrove: Water	uTitan(L):Qiagen	Komarkovaea angustata	1146	30	1176
sp305	154.934	4.19518	0.616928	6.80012	1.05E-11	9.22E-10	Bacteria	Bacteria_none	Proteobacteria	Gammaproteobacteria	Chromatiales	Granulosicoccaceae	Sulfuriflexus	Sulfuriflexus mobilis	Mangrove: Water	uTitan(L):Qiagen	Sulfuriflexus mobilis	1707	44	1751
sp1230	47.7295	4.16701	1.12775	3.69497	0.000219911	0.00236389	Bacteria	Bacteria_none	Firmicutes	Bacilli	Bacillales	Paenibacillaceae	Cohnella	Cohnella faecalis	Mangrove: Water	uTitan(L):Qiagen	Cohnella faecalis	537	15	552
sp478	157.684	3.94273	0.611085	6.45201	1.10E-10	6.91E-09	Bacteria	Bacteria_none	Firmicutes	Clostridia	Eubacteriales	Clostridiaceae	Anaeromicrobium	Anaeromicrobium sediminis	Mangrove: Water	uTitan(L):Qiagen	Anaeromicrobium sediminis	1736	52	1788
sp429	164.261	3.91028	1.14313	3.42069	0.00062463	0.00811073	Bacteria	Bacteria_none	Firmicutes	Clostridia	Eubacteriales	Desulfotomaculaceae	Pelotomaculum	Pelotomaculum thermopropionicum	Mangrove: Sediment	uTitan(L):Qiagen	Pelotomaculum thermopropionicum	1691	57	1748
sp763	45.6133	3.88017	1.17111	3.31324	0.000922232	0.00746186	Bacteria	Bacteria_none	Proteobacteria	Gammaproteobacteria	Cardiobacteriales	Cardiobacteriaceae	Dichelobacter	Dichelobacter nodosus	Mangrove: Water	uTitan(L):Qiagen	Dichelobacter nodosus	496	16	512
sp702	75.5841	3.8234	0.913623	4.18488	2.85E-05	0.000432435	Bacteria	Bacteria_none	Proteobacteria	Gammaproteobacteria	Alteromonadales	Pseudoalteromonadaceae	Algicola	Algicola bacteriolytica	Mangrove: Water	uTitan(L):Qiagen	Algicola bacteriolytica	830	27	857
sp146	363.356	3.81635	0.908984	4.19848	2.69E-05	0.000712242	Bacteria	Bacteria_none	Proteobacteria	Alphaproteobacteria	Rhodospirillales	Acetobacteraceae	Komagataeibacter	Komagataeibacter europaeus	Mangrove: Sediment	uTitan(L):Qiagen	Komagataeibacter europaeus	3660	133	3793
sp478	77.1138	3.74178	1.11272	3.36272	0.000771794	0.0133134	Bacteria	Bacteria_none	Firmicutes	Clostridia	Eubacteriales	Clostridiaceae	Anaeromicrobium	Anaeromicrobium sediminis	Coral-W	uTitan(L):Qiagen	Anaeromicrobium sediminis	472	17	489
sp235	476.498	3.70332	1.10886	3.33975	0.000838524	0.0101213	Bacteria	Bacteria_none	Proteobacteria	Alphaproteobacteria	Rhodospirillales	Rhodospirillaceae	Denitrobaculum	Denitrobaculum tricleocarpae	Mangrove: Sediment	uTitan(L):Qiagen	Denitrobaculum tricleocarpae	4606	187	4793
sp880	33.6422	3.68801	1.20247	3.06703	0.00216197	0.0146635	Bacteria	Bacteria_none	Firmicutes	Clostridia	Eubacteriales	Oscillospiraceae	Scatolibacter	Scatolibacter rhodanostii	Mangrove: Water	uTitan(L):Qiagen	Scatolibacter rhodanostii	367	14	381
sp59	880.121	3.6406	0.991221	3.67284	0.000239869	0.00400457	Bacteria	Bacteria_none	Proteobacteria	Alphaproteobacteria	Rhodospirillales	Rhodospirillaceae	Hwanghaeella	Hwanghaeella grinnelliae	Mangrove: Sediment	uTitan(L):Qiagen	Hwanghaeella grinnelliae	8452	356	8808
sp629	42.5108	3.59804	1.22852	2.92875	0.00340328	0.0204408	Bacteria	Bacteria_none	Proteobacteria	Gammaproteobacteria	Alteromonadales	Alteromonadaceae	Marisediminitalea	Marisediminitalea aggregata	Mangrove: Water	uTitan(L):Qiagen	Marisediminitalea aggregata	455	16	471
sp1203	24.1418	3.59352	1.27063	2.82815	0.00468186	0.026371	Bacteria	Bacteria_none	Proteobacteria	Gammaproteobacteria	Oceanospirillales	Alcanivoracaceae	Alcanivorax	Alcanivorax indicus	Mangrove: Water	uTitan(L):Qiagen	Alcanivorax indicus	265	11	276
sp185	402.833	3.56968	0.312307	11.43	2.96E-30	1.91E-27	Bacteria	Bacteria_none	Firmicutes	Clostridia	Eubacteriales	Peptostreptococcaceae	Peptostreptococcus	Peptostreptococcus russellii	Mangrove: Water	uTitan(L):Qiagen	Peptostreptococcus russellii	4343	172	4515
sp22	2611.53	3.56841	0.251473	14.19	1.06E-45	1.02E-42	Bacteria	Bacteria_none	Proteobacteria	Gammaproteobacteria	Enterobacterales	Morganellaceae	Providencia	Providencia alcalifaciens	Mangrove: Water	uTitan(L):Qiagen	Providencia alcalifaciens	28190	1104	29294
sp324	904.249	3.56732	0.385288	9.25883	2.07E-20	7.97E-18	Bacteria	Bacteria_none	Cyanobacteria	Cyanobacteria_Incertae_sedis	Oscillatoriales	Sirenicapillariaceae	Neolyngbya	Neolyngbya tenuis	Coral-W	uTitan(L):uTitan(F)	Neolyngbya tenuis	2243	463	2706
sp707	36.1397	3.51826	1.23132	2.8573	0.0042726	0.0246692	Bacteria	Bacteria_none	Proteobacteria	Gammaproteobacteria	Alteromonadales	Pseudoalteromonadaceae	Psychrosphaera	Psychrosphaera ytuae	Mangrove: Water	uTitan(L):Qiagen	Psychrosphaera ytuae	386	16	402
sp1669	24.5419	3.49959	1.28679	2.71962	0.0065356	0.0342678	Bacteria	Bacteria_none	Cyanobacteria	Cyanobacteria_Incertae_sedis	Nostocales	Nostocaceae	Mojavia	Mojavia pulchra	Mangrove: Water	uTitan(L):Qiagen	Mojavia pulchra	268	11	279
sp679	156.309	3.45656	1.12347	3.07669	0.00209316	0.0199315	Bacteria	Bacteria_none	Proteobacteria	Alphaproteobacteria	Rhodospirillales	Rhodospirillaceae	Lacibacterium	Lacibacterium aquatile	Mangrove: Sediment	uTitan(L):Qiagen	Lacibacterium aquatile	1463	73	1536
sp583	194.087	3.45037	0.928884	3.71453	0.000203578	0.00358493	Bacteria	Bacteria_none	Bacteroidota	Bacteroidia	Bacteroidales	Odoribacteraceae	Odoribacter	Odoribacter denticanis	Mangrove: Sediment	uTitan(L):Qiagen	Odoribacter denticanis	1873	91	1964
sp501	249.221	3.41509	0.933609	3.65794	0.000254246	0.00419017	Bacteria	Bacteria_none	Firmicutes	Negativicutes	Selenomonadales	Sporomusaceae	Pelosinus	Pelosinus defluvii	Mangrove: Sediment	uTitan(L):Qiagen	Pelosinus defluvii	2389	120	2509
sp934	99.371	3.39454	0.897576	3.7819	0.000155639	0.00295515	Bacteria	Bacteria_none	Cyanobacteria	Cyanobacteria_Incertae_sedis	Oscillatoriales	Coleofasciculaceae	Coleofasciculus	Coleofasciculus chthonoplastes	Coral-W	uTitan(L):uTitan(F)	Coleofasciculus chthonoplastes	240	57	297
sp445	309.416	3.37078	1.2484	2.70007	0.00693257	0.0474033	Bacteria	Bacteria_none	Proteobacteria	Alphaproteobacteria	Rhodospirillales	Azospirillaceae	Desertibacter	Desertibacter xinjiangensis	Mangrove: Sediment	uTitan(L):Qiagen	Desertibacter xinjiangensis	2824	152	2976
sp590	142.82	3.34186	1.19778	2.79006	0.00526984	0.0386004	Bacteria	Bacteria_none	Bacteroidota	Flavobacteriia	Flavobacteriales	Flavobacteriaceae	Mesoflavibacter	Mesoflavibacter zeaxanthinifaciens	Mangrove: Sediment	uTitan(L):Qiagen	Mesoflavibacter zeaxanthinifaciens	1384	71	1455
sp490	45.1978	3.33706	0.933423	3.57508	0.000350118	0.00357489	Bacteria	Bacteria_none	Proteobacteria	Alphaproteobacteria	Hyphomicrobiales	Parvibaculaceae	Pyruvatibacter	Pyruvatibacter mobilis	Mangrove: Water	uTitan(L):Qiagen	Pyruvatibacter mobilis	481	23	504
sp270	74.7482	3.31245	1.14768	2.88622	0.00389897	0.0474757	Bacteria	Bacteria_none	Proteobacteria	Gammaproteobacteria	Pasteurellales	Pasteurellaceae	Bisgaardia	Bisgaardia hudsonensis	Coral-W	uTitan(L):Qiagen	Bisgaardia hudsonensis	458	22	480
sp343	309.215	3.31229	0.975044	3.39706	0.000681131	0.00841917	Bacteria	Bacteria_none	Proteobacteria	Alphaproteobacteria	Rhodospirillales	Thalassospiraceae	Varunaivibrio	Varunaivibrio sulfuroxidans	Mangrove: Sediment	uTitan(L):Qiagen	Varunaivibrio sulfuroxidans	2958	158	3116
sp37	106.106	3.24959	1.14823	2.83008	0.00465364	0.0457559	Bacteria	Bacteria_none	Firmicutes	Bacilli	Bacillales	Staphylococcaceae	Staphylococcus	Staphylococcus epidermidis	Mangrove: Water	uTitan(L):uTitan(F)	Staphylococcus epidermidis	1239	59	1298
sp795	81.5157	3.20386	1.09926	2.91456	0.0035619	0.0286176	Bacteria	Bacteria_none	Proteobacteria	Gammaproteobacteria	Cellvibrionales	Cellvibrionaceae	Teredinibacter	Teredinibacter franksiae	Mangrove: Sediment	uTitan(L):Qiagen	Teredinibacter franksiae	812	45	857
sp22	1842.2	3.19909	0.207055	15.4504	7.50E-54	3.10E-51	Bacteria	Bacteria_none	Proteobacteria	Gammaproteobacteria	Enterobacterales	Morganellaceae	Providencia	Providencia alcalifaciens	Coral-W	uTitan(L):Qiagen	Providencia alcalifaciens	11064	475	11539
sp523	188.395	3.12083	0.915417	3.40919	0.000651553	0.00829278	Bacteria	Bacteria_none	Proteobacteria	Gammaproteobacteria	Gammaproteobacteria_Incertae_sedis	Gammaproteobacteria_Incertae_sedis_Incertae_sedis	Pseudohongiella	Pseudohongiella acticola	Mangrove: Sediment	uTitan(L):Qiagen	Pseudohongiella acticola	1822	106	1928
sp72	674.051	3.09572	0.80617	3.84004	0.000123016	0.00239602	Bacteria	Bacteria_none	Proteobacteria	Alphaproteobacteria	Rhodospirillales	Rhodospirillaceae	Pacificispira	Pacificispira spongiicola	Mangrove: Sediment	uTitan(L):Qiagen	Pacificispira spongiicola	6492	395	6887
sp1296	50.6631	3.06667	0.983843	3.11703	0.00182681	0.0126572	Bacteria	Bacteria_none	Proteobacteria	Gammaproteobacteria	Pseudomonadales	Pseudomonadaceae	Entomomonas	Entomomonas moraniae	Mangrove: Water	uTitan(L):Qiagen	Entomomonas moraniae	530	28	558
sp442	64.6421	3.00108	0.979571	3.06366	0.00218644	0.0147281	Bacteria	Bacteria_none	Firmicutes	Bacilli	Bacillales	Paenibacillaceae	Cohnella	Cohnella fontinalis	Mangrove: Water	uTitan(L):Qiagen	Cohnella fontinalis	676	42	718
sp327	191.389	3.00102	1.02074	2.94003	0.00328181	0.0268711	Bacteria	Bacteria_none	Proteobacteria	Alphaproteobacteria	Rhodospirillales	Terasakiellaceae	Terasakiella	Terasakiella pusilla	Mangrove: Sediment	uTitan(L):Qiagen	Terasakiella pusilla	1761	116	1877
sp373	211.364	2.99653	0.950642	3.15211	0.00162095	0.0167368	Bacteria	Bacteria_none	Proteobacteria	Gammaproteobacteria	Oceanospirillales	Oceanospirillaceae	Marinomonas	Marinomonas ushuaiensis	Mangrove: Sediment	uTitan(L):Qiagen	Marinomonas ushuaiensis	2027	130	2157
sp660	330.364	2.96037	0.510756	5.79607	6.79E-09	4.76E-07	Bacteria	Bacteria_none	Cyanobacteria	Cyanobacteria_Incertae_sedis	Oscillatoriales	Microcoleaceae	Microcoleus	Microcoleus acremannii	Coral-W	uTitan(L):uTitan(F)	Microcoleus acremannii	797	243	1040
sp505	80.9846	2.92686	0.977369	2.99463	0.0027478	0.0238609	Bacteria	Bacteria_none	Proteobacteria	Gammaproteobacteria	Alteromonadales	Pseudoalteromonadaceae	Pseudoalteromonas	Pseudoalteromonas xishaensis	Mangrove: Sediment	uTitan(L):Qiagen	Pseudoalteromonas xishaensis	760	53	813
sp42	977.391	2.92098	0.196719	14.8485	7.11E-50	1.38E-46	Bacteria	Bacteria_none	Proteobacteria	Gammaproteobacteria	Cellvibrionales	Halieaceae	Halioglobus	Halioglobus japonicus	Mangrove: Water	uTitan(L):Qiagen	Halioglobus japonicus	10105	626	10731
sp282	348.893	2.90389	0.89139	3.25771	0.00112315	0.0127208	Bacteria	Bacteria_none	Balneolaeota	Balneolia	Balneolales	Balneolaceae	Gracilimonas	Gracilimonas halophila	Mangrove: Sediment	uTitan(L):Qiagen	Gracilimonas halophila	3259	227	3486
sp187	492.946	2.879	0.755593	3.81025	0.000138824	0.00264382	Bacteria	Bacteria_none	Proteobacteria	Alphaproteobacteria	Sphingomonadales	Sphingomonadaceae	Sphingomonas	Sphingomonas kyeonggiensis	Mangrove: Sediment	uTitan(L):Qiagen	Sphingomonas kyeonggiensis	4709	332	5041
sp550	90.2475	2.873	0.883761	3.25088	0.00115047	0.012973	Bacteria	Bacteria_none	Proteobacteria	Gammaproteobacteria	Cardiobacteriales	Cardiobacteriaceae	Suttonella	Suttonella indologenes	Mangrove: Sediment	uTitan(L):Qiagen	Suttonella indologenes	860	60	920
sp217	368.491	2.85751	0.965027	2.96106	0.00306578	0.025928	Bacteria	Bacteria_none	Proteobacteria	Alphaproteobacteria	Maricaulales	Maricaulaceae	Oceanicaulis	Oceanicaulis stylophorae	Mangrove: Sediment	uTitan(L):Qiagen	Oceanicaulis stylophorae	3518	244	3762
sp270	330.979	2.84099	0.305955	9.28565	1.61E-20	5.20E-18	Bacteria	Bacteria_none	Proteobacteria	Gammaproteobacteria	Pasteurellales	Pasteurellaceae	Bisgaardia	Bisgaardia hudsonensis	Mangrove: Water	uTitan(L):Qiagen	Bisgaardia hudsonensis	3392	222	3614
sp808	65.3928	2.81697	0.721737	3.90304	9.50E-05	0.00120448	Bacteria	Bacteria_none	Proteobacteria	Gammaproteobacteria	Oceanospirillales	Oceanospirillaceae	Marinomonas	Marinomonas epiphytica	Mangrove: Water	uTitan(L):Qiagen	Marinomonas epiphytica	670	44	714
sp645	104.596	2.81601	0.410973	6.85205	7.28E-12	6.73E-10	Bacteria	Bacteria_none	Firmicutes	Clostridia	Eubacteriales	Lachnospiraceae	Moryella	Moryella indoligenes	Mangrove: Water	uTitan(L):Qiagen	Moryella indoligenes	1070	71	1141
sp1405	45.7723	2.81204	1.01931	2.75878	0.00580176	0.0313521	Bacteria	Bacteria_none	Proteobacteria	Gammaproteobacteria	Alteromonadales	Alteromonadaceae	Alishewanella	Alishewanella alkalitolerans	Mangrove: Water	uTitan(L):Qiagen	Alishewanella alkalitolerans	468	30	498
sp284	458.578	2.77695	0.871654	3.18583	0.00144337	0.0154622	Bacteria	Bacteria_none	Balneolaeota	Balneolia	Balneolales	Balneolaceae	Gracilimonas	Gracilimonas mengyeensis	Mangrove: Sediment	uTitan(L):Qiagen	Gracilimonas mengyeensis	4260	330	4590
sp447	150.029	2.77191	0.966135	2.86907	0.00411678	0.0320735	Bacteria	Bacteria_none	Proteobacteria	Alphaproteobacteria	Rhodospirillales	Rhodospirillaceae	Caenispirillum	Caenispirillum salinarum	Mangrove: Sediment	uTitan(L):Qiagen	Caenispirillum salinarum	1429	108	1537
sp98	1367.17	2.768	1.02597	2.69794	0.00697697	0.0475803	Bacteria	Bacteria_none	Balneolaeota	Balneolia	Balneolales	Balneolaceae	Gracilimonas	Gracilimonas rosea	Mangrove: Sediment	uTitan(L):Qiagen	Gracilimonas rosea	12374	983	13357
sp1468	38.3461	2.76789	1.01034	2.73957	0.006152	0.0328784	Bacteria	Bacteria_none	Proteobacteria	Deltaproteobacteria	Desulfuromonadales	Geobacteraceae	Citrifermentans	Citrifermentans pelophilum	Mangrove: Water	uTitan(L):Qiagen	Citrifermentans pelophilum	393	29	422
sp185	174.457	2.7637	0.606209	4.559	5.14E-06	0.000185034	Bacteria	Bacteria_none	Firmicutes	Clostridia	Eubacteriales	Peptostreptococcaceae	Peptostreptococcus	Peptostreptococcus russellii	Coral-W	uTitan(L):Qiagen	Peptostreptococcus russellii	1014	61	1075
sp849	68.4122	2.73072	0.790084	3.45624	0.000547765	0.00729692	Bacteria	Bacteria_none	Firmicutes	Bacilli	Lactobacillales	Streptococcaceae	Lactococcus	Lactococcus fujiensis	Mangrove: Sediment	uTitan(L):Qiagen	Lactococcus fujiensis	658	50	708
sp272	183.794	2.72735	0.965536	2.82471	0.00473242	0.0353693	Bacteria	Bacteria_none	Proteobacteria	Gammaproteobacteria	Thiotrichales	Francisellaceae	Francisella	Francisella uliginis	Mangrove: Sediment	uTitan(L):Qiagen	Francisella uliginis	1879	134	2013
sp152	538.218	2.70926	0.969568	2.79429	0.00520134	0.0382339	Bacteria	Bacteria_none	Proteobacteria	Gammaproteobacteria	Gammaproteobacteria_Incertae_sedis	Gammaproteobacteria_Incertae_sedis_Incertae_sedis	Pseudohongiella	Pseudohongiella spirulinae	Mangrove: Sediment	uTitan(L):Qiagen	Pseudohongiella spirulinae	5018	393	5411
sp30	122.729	2.69094	0.704973	3.81708	0.000135039	0.00161714	Bacteria	Bacteria_none	Firmicutes	Bacilli	Bacillales	Paenibacillaceae	Paenibacillus	Paenibacillus cookii	Mangrove: Water	uTitan(L):Qiagen	Paenibacillus cookii	1258	96	1354
sp601	76.7776	2.68789	0.416268	6.45713	1.07E-10	6.90E-09	Bacteria	Bacteria_none	Proteobacteria	Gammaproteobacteria	Chromatiales	Chromatiaceae	Rheinheimera	Rheinheimera japonica	Mangrove: Water	uTitan(L):Qiagen	Rheinheimera japonica	779	57	836
sp354	98.9655	2.67653	0.784785	3.41053	0.000648375	0.0114224	Bacteria	Bacteria_none	Proteobacteria	Gammaproteobacteria	Oceanospirillales	Oceanospirillaceae	Oceanobacter	Oceanobacter kriegii	Coral-W	uTitan(L):Qiagen	Oceanobacter kriegii	566	34	600
sp465	210.524	2.66188	0.746188	3.56731	0.000360667	0.00542266	Bacteria	Bacteria_none	Firmicutes	Erysipelotrichia	Erysipelotrichales	Erysipelotrichaceae	Massilicoli	Massilicoli timonensis	Mangrove: Sediment	uTitan(L):Qiagen	Massilicoli timonensis	2048	160	2208
sp241	96.8938	2.6328	0.77185	3.41103	0.000647178	0.00578583	Bacteria	Bacteria_none	Cyanobacteria	Cyanobacteria_Incertae_sedis	Oscillatoriales	Sirenicapillariaceae	Capilliphycus	Capilliphycus salinus	Mangrove: Water	uTitan(L):Qiagen	Capilliphycus salinus	973	70	1043
sp149	496.842	2.62568	0.822369	3.19282	0.00140888	0.0152195	Bacteria	Bacteria_none	Proteobacteria	Alphaproteobacteria	Rhodospirillales	Rhodospirillaceae	Marivibrio	Marivibrio halodurans	Mangrove: Sediment	uTitan(L):Qiagen	Marivibrio halodurans	4645	385	5030
sp324	152.032	2.6103	0.695785	3.75159	0.000175714	0.00410987	Bacteria	Bacteria_none	Cyanobacteria	Cyanobacteria_Incertae_sedis	Oscillatoriales	Sirenicapillariaceae	Neolyngbya	Neolyngbya tenuis	Mangrove: Water	uTitan(L):uTitan(F)	Neolyngbya tenuis	1679	102	1781
sp42	1194.79	2.59006	0.243588	10.6329	2.09E-26	4.33E-24	Bacteria	Bacteria_none	Proteobacteria	Gammaproteobacteria	Cellvibrionales	Halieaceae	Halioglobus	Halioglobus japonicus	Coral-W	uTitan(L):Qiagen	Halioglobus japonicus	6708	443	7151
sp204	604.385	2.56833	0.820435	3.13045	0.00174537	0.0175975	Bacteria	Bacteria_none	Proteobacteria	Gammaproteobacteria	Oceanospirillales	Alcanivoracaceae	Alcanivorax	Alcanivorax limicola	Mangrove: Sediment	uTitan(L):Qiagen	Alcanivorax limicola	5622	479	6101
sp339	236.51	2.56146	0.836596	3.06176	0.00220038	0.0206467	Bacteria	Bacteria_none	Proteobacteria	Gammaproteobacteria	Oceanospirillales	Oceanospirillaceae	Marinomonas	Marinomonas algicola	Mangrove: Sediment	uTitan(L):Qiagen	Marinomonas algicola	2240	190	2430
sp712	116.822	2.54913	0.855101	2.98109	0.00287225	0.0246975	Bacteria	Bacteria_none	Proteobacteria	Alphaproteobacteria	Hyphomicrobiales	Rhodovibrionaceae	Pelagibius	Pelagibius litoralis	Mangrove: Sediment	uTitan(L):Qiagen	Pelagibius litoralis	1076	97	1173
sp354	134.794	2.53198	0.327321	7.73545	1.03E-14	1.54E-12	Bacteria	Bacteria_none	Proteobacteria	Gammaproteobacteria	Oceanospirillales	Oceanospirillaceae	Oceanobacter	Oceanobacter kriegii	Mangrove: Water	uTitan(L):Qiagen	Oceanobacter kriegii	1346	110	1456
sp642	110.646	2.52417	0.895176	2.81974	0.00480623	0.0358169	Bacteria	Bacteria_none	Proteobacteria	Gammaproteobacteria	Chromatiales	Ectothiorhodospiraceae	Thiohalospira	Thiohalospira halophila	Mangrove: Sediment	uTitan(L):Qiagen	Thiohalospira halophila	1018	91	1109
sp13	9010.23	2.50667	0.143028	17.5257	9.11E-69	7.55E-66	Bacteria	Bacteria_none	Proteobacteria	Alphaproteobacteria	Rhodobacterales	Rhodobacteraceae	Frigidibacter	Frigidibacter oleivorans	Coral-W	uTitan(L):Qiagen	Frigidibacter oleivorans	50143	3404	53547
sp449	116.995	2.49869	0.698262	3.57844	0.000345656	0.003548	Bacteria	Bacteria_none	Proteobacteria	Alphaproteobacteria	Hyphomicrobiales	Nitrobacteraceae	Afipia	[Pseudomonas] carboxydohydrogena	Mangrove: Water	uTitan(L):Qiagen	[Pseudomonas] carboxydohydrogena	1175	101	1276
sp169	929.763	2.49207	0.27549	9.04596	1.48E-19	2.05E-17	Bacteria	Bacteria_none	Proteobacteria	Alphaproteobacteria	Rhodobacterales	Rhodobacteraceae	Paracoccus	Paracoccus stylophorae	Coral-W	uTitan(L):Qiagen	Paracoccus stylophorae	5179	357	5536
sp232	284.688	2.44978	0.255812	9.57648	1.00E-21	3.90E-19	Bacteria	Bacteria_none	Actinobacteria	Actinomycetia	Glycomycetales	Glycomycetaceae	Glycomyces	Glycomyces luteolus	Mangrove: Water	uTitan(L):Qiagen	Glycomyces luteolus	2808	246	3054
sp97	185.007	2.39206	0.369479	6.47414	9.54E-11	6.38E-09	Bacteria	Bacteria_none	Lentisphaerae	Lentisphaeria	Lentisphaerales	Lentisphaeraceae	Lentisphaera	Lentisphaera profundi	Mangrove: Water	uTitan(L):Qiagen	Lentisphaera profundi	1815	161	1976
sp229	381.411	2.38931	0.880474	2.71366	0.0066545	0.0463651	Bacteria	Bacteria_none	Proteobacteria	Gammaproteobacteria	Oceanospirillales	Aestuariirhabdaceae	Aestuariirhabdus	Aestuariirhabdus litorea	Mangrove: Sediment	uTitan(L):Qiagen	Aestuariirhabdus litorea	3473	334	3807
sp759	57.4621	2.36131	0.738351	3.19808	0.00138345	0.0102439	Bacteria	Bacteria_none	Proteobacteria	Gammaproteobacteria	Nevskiales	Algiphilaceae	Algiphilus	Algiphilus acroporae	Mangrove: Water	uTitan(L):Qiagen	Algiphilus acroporae	564	53	617
sp48	742.196	2.32613	0.859575	2.70614	0.00680702	0.0468183	Bacteria	Bacteria_none	Proteobacteria	Alphaproteobacteria	Kordiimonadales	Kordiimonadaceae	Kordiimonas	Kordiimonas marina	Mangrove: Sediment	uTitan(L):Qiagen	Kordiimonas marina	6967	676	7643
sp516	139.359	2.31825	0.355974	6.51241	7.40E-11	5.12E-09	Bacteria	Bacteria_none	Proteobacteria	Alphaproteobacteria	Hyphomicrobiales	Boseaceae	Bosea	Bosea eneae	Mangrove: Water	uTitan(L):Qiagen	Bosea eneae	1360	127	1487
sp666	337.956	2.30838	0.464929	4.96501	6.87E-07	2.59E-05	Bacteria	Bacteria_none	Cyanobacteria	Cyanobacteria_Incertae_sedis	Oscillatoriales	Oscillatoriaceae	Oscillatoria	Oscillatoria sancta	Coral-W	uTitan(L):uTitan(F)	Oscillatoria sancta	748	348	1096
sp595	334.351	2.29207	0.597138	3.83843	0.000123825	0.00238827	Bacteria	Bacteria_none	Cyanobacteria	Cyanobacteria_Incertae_sedis	Oscillatoriales	Sirenicapillariaceae	Affixifilum	Affixifilum granulosum	Coral-W	uTitan(L):uTitan(F)	Affixifilum granulosum	739	384	1123
sp842	106.694	2.2752	0.453298	5.01922	5.19E-07	1.48E-05	Bacteria	Bacteria_none	Tenericutes	Mollicutes	Acholeplasmatales	Acholeplasmataceae	Alteracholeplasma	Alteracholeplasma palmae	Mangrove: Water	uTitan(L):Qiagen	Alteracholeplasma palmae	1037	102	1139
sp1455	121.16	2.21749	0.792473	2.79819	0.00513894	0.0450533	Bacteria	Bacteria_none	Actinobacteria	Actinomycetia	Streptomycetales	Streptomycetaceae	Streptomyces	Streptomyces camponoti	Coral-W	uTitan(L):uTitan(F)	Streptomyces camponoti	266	140	406
sp11	5525.24	2.20524	0.247396	8.91382	4.93E-19	1.37E-16	Bacteria	Bacteria_none	Proteobacteria	Gammaproteobacteria	Oceanospirillales	Oceanospirillaceae	Neptunomonas	Neptunomonas acidivorans	Mangrove: Water	uTitan(L):Qiagen	Neptunomonas acidivorans	53204	5365	58569
sp514	135.677	2.20074	0.669174	3.28874	0.00100636	0.0166654	Bacteria	Bacteria_none	Proteobacteria	Alphaproteobacteria	Rhodobacterales	Rhodobacteraceae	Parasedimentitalea	Parasedimentitalea marina	Coral-W	uTitan(L):Qiagen	Parasedimentitalea marina	728	61	789
sp273	332.074	2.19747	0.810718	2.71052	0.00671771	0.0465532	Bacteria	Bacteria_none	Verrucomicrobia	Verrucomicrobiae	Verrucomicrobiales	Verrucomicrobia subdivision 3	Limisphaera	Limisphaera ngatamarikiensis	Mangrove: Sediment	uTitan(L):Qiagen	Limisphaera ngatamarikiensis	2974	333	3307
sp698	68.4869	2.18852	0.768406	2.84813	0.00439775	0.0253164	Bacteria	Bacteria_none	Proteobacteria	Alphaproteobacteria	Hyphomicrobiales	Nitrobacteraceae	Afipia	Afipia clevelandensis	Mangrove: Water	uTitan(L):Qiagen	Afipia clevelandensis	656	71	727
sp462	205.46	2.18508	0.786378	2.77866	0.00545835	0.0393093	Bacteria	Bacteria_none	Proteobacteria	Gammaproteobacteria	Oceanospirillales	Halomonadaceae	Halomonas	Halomonas heilongjiangensis	Mangrove: Sediment	uTitan(L):Qiagen	Halomonas heilongjiangensis	1857	204	2061
sp374	59.2335	2.1847	0.768999	2.84096	0.00449777	0.0256979	Bacteria	Bacteria_none	Bacteroidota	Flavobacteriia	Flavobacteriales	Flavobacteriaceae	Citreitalea	Citreitalea marina	Mangrove: Water	uTitan(L):Qiagen	Citreitalea marina	569	57	626
sp855	106.089	2.18133	0.43895	4.96943	6.71E-07	1.86E-05	Bacteria	Bacteria_none	Tenericutes	Mollicutes	Acholeplasmatales	Acholeplasmataceae	Paracholeplasma	Paracholeplasma brassicae	Mangrove: Water	uTitan(L):Qiagen	Paracholeplasma brassicae	1020	107	1127
sp544	104.196	2.14582	0.395376	5.42729	5.72E-08	2.31E-06	Bacteria	Bacteria_none	Actinobacteria	Actinomycetia	Corynebacteriales	Nocardiaceae	Rhodococcus	Rhodococcus qingshengii	Mangrove: Water	uTitan(L):Qiagen	Rhodococcus qingshengii	994	105	1099
sp1090	53.3286	2.10461	0.791516	2.65896	0.00783815	0.0404401	Bacteria	Bacteria_none	Proteobacteria	Alphaproteobacteria	Rhodobacterales	Roseobacteraceae	Sulfitobacter	Sulfitobacter brevis	Mangrove: Water	uTitan(L):Qiagen	Sulfitobacter brevis	511	55	566
sp209	70.4337	2.08065	0.755969	2.7523	0.00591791	0.0318026	Bacteria	Bacteria_none	Verrucomicrobia	Opitutae	Puniceicoccales	Puniceicoccaceae	Coraliomargarita	Coraliomargarita akajimensis	Mangrove: Water	uTitan(L):Qiagen	Coraliomargarita akajimensis	665	75	740
sp268	150.096	2.07858	0.679648	3.05832	0.00222584	0.0207342	Bacteria	Bacteria_none	Verrucomicrobia	Opitutae	Puniceicoccales	Puniceicoccaceae	Cerasicoccus	Cerasicoccus frondis	Mangrove: Sediment	uTitan(L):Qiagen	Cerasicoccus frondis	1406	159	1565
sp128	692.667	2.07445	0.61407	3.3782	0.000729619	0.0122819	Bacteria	Bacteria_none	Proteobacteria	Alphaproteobacteria	Rhodospirillales	Stellaceae	Constrictibacter	Constrictibacter antarcticus	Mangrove: Water	uTitan(L):uTitan(F)	Constrictibacter antarcticus	7287	734	8021
sp1306	35.2638	2.07325	0.794731	2.60875	0.00908745	0.0456727	Bacteria	Bacteria_none	Tenericutes	Mollicutes	Anaeroplasmatales	Anaeroplasmataceae	Anaeroplasma	Anaeroplasma abactoclasticum	Mangrove: Water	uTitan(L):Qiagen	Anaeroplasma abactoclasticum	338	39	377
sp269	374.716	2.07265	0.294531	7.03711	1.96E-12	2.24E-10	Bacteria	Bacteria_none	Tenericutes	Mollicutes	Acholeplasmatales	Acholeplasmataceae	Alteracholeplasma	Alteracholeplasma parvum	Mangrove: Water	uTitan(L):Qiagen	Alteracholeplasma parvum	3549	400	3949
sp572	84.0213	2.06657	0.768437	2.68932	0.00715977	0.0485693	Bacteria	Bacteria_none	Proteobacteria	Gammaproteobacteria	Cellvibrionales	Spongiibacteraceae	Spongiibacter	Spongiibacter marinus	Mangrove: Sediment	uTitan(L):Qiagen	Spongiibacter marinus	750	90	840
sp561	224.377	2.05267	0.565339	3.63087	0.000282468	0.00484275	Bacteria	Bacteria_none	Firmicutes	Clostridia	Eubacteriales	Oscillospiraceae	Fastidiosipila	Fastidiosipila sanguinis	Coral-W	uTitan(L):uTitan(F)	Fastidiosipila sanguinis	492	267	759
sp89	490.923	2.03949	0.258169	7.8998	2.79E-15	4.52E-13	Bacteria	Bacteria_none	Proteobacteria	Gammaproteobacteria	Chromatiales	Granulosicoccaceae	Granulosicoccus	Granulosicoccus marinus	Mangrove: Water	uTitan(L):Qiagen	Granulosicoccus marinus	4570	529	5099
sp296	358.357	2.02883	0.708756	2.86253	0.0042028	0.0326447	Bacteria	Bacteria_none	Bacteroidota	Cytophagia	Cytophagales	Roseivirgaceae	Roseivirga	Roseivirga misakiensis	Mangrove: Sediment	uTitan(L):Qiagen	Roseivirga misakiensis	3227	400	3627
sp121	548.263	1.93869	0.32666	5.9349	2.94E-09	1.54E-07	Bacteria	Bacteria_none	Cyanobacteria	Cyanobacteria_Incertae_sedis	Nostocales	Hapalosiphonaceae	Fischerella	Fischerella indica	Mangrove: Water	uTitan(L):Qiagen	Fischerella indica	5094	620	5714
sp555	98.2087	1.93607	0.404723	4.78368	1.72E-06	4.28E-05	Bacteria	Bacteria_none	Firmicutes	Clostridia	Eubacteriales	Peptostreptococcaceae	Criibacterium	Criibacterium bergeronii	Mangrove: Water	uTitan(L):Qiagen	Criibacterium bergeronii	907	111	1018
sp11	2998.31	1.92863	0.171938	11.217	3.37E-29	9.29E-27	Bacteria	Bacteria_none	Proteobacteria	Gammaproteobacteria	Oceanospirillales	Oceanospirillaceae	Neptunomonas	Neptunomonas acidivorans	Coral-W	uTitan(L):Qiagen	Neptunomonas acidivorans	15767	1592	17359
sp456	322.127	1.90803	0.471255	4.04884	5.15E-05	0.00110309	Bacteria	Bacteria_none	Proteobacteria	Alphaproteobacteria	Rhodobacterales	Roseobacteraceae	Nereida	Nereida ignava	Coral-W	uTitan(L):uTitan(F)	Nereida ignava	681	416	1097
sp561	97.397	1.90255	0.622522	3.0562	0.00224162	0.0269237	Bacteria	Bacteria_none	Firmicutes	Clostridia	Eubacteriales	Oscillospiraceae	Fastidiosipila	Fastidiosipila sanguinis	Mangrove: Water	uTitan(L):uTitan(F)	Fastidiosipila sanguinis	992	107	1099
sp12	2030.17	1.89267	0.264754	7.1488	8.75E-13	1.06E-10	Bacteria	Bacteria_none	Cyanobacteria	Cyanobacteria_Incertae_sedis	Synechococcales	Prochlorococcaceae	Prochlorococcus	Prochlorococcus marinus	Mangrove: Water	uTitan(L):Qiagen	Prochlorococcus marinus	18653	2354	21007
sp200	712.762	1.85005	0.329178	5.6202	1.91E-08	1.28E-06	Bacteria	Bacteria_none	Proteobacteria	Alphaproteobacteria	Rhodobacterales	Rhodobacteraceae	Marimonas	Marimonas arenosa	Coral-W	uTitan(L):uTitan(F)	Marimonas arenosa	1495	939	2434
sp612	478.189	1.84048	0.461471	3.98828	6.66E-05	0.00138772	Bacteria	Bacteria_none	Bacteroidota	Flavobacteriia	Flavobacteriales	Flavobacteriaceae	Aequorivita	Aequorivita crocea	Coral-W	uTitan(L):uTitan(F)	Aequorivita crocea	1012	685	1697
sp371	217.717	1.825	0.530615	3.43939	0.000583018	0.0104943	Bacteria	Bacteria_none	Proteobacteria	Alphaproteobacteria	Rhodospirillales	Rhodospirillaceae	Caenispirillum	Caenispirillum deserti	Coral-W	uTitan(L):Qiagen	Caenispirillum deserti	1116	120	1236
sp52	2663.23	1.81536	0.193944	9.36025	7.95E-21	4.09E-18	Bacteria	Bacteria_none	Cyanobacteria	Cyanobacteria_Incertae_sedis	Pseudanabaenales	Leptolyngbyaceae	Chroakolemma	Chroakolemma pellucida	Coral-W	uTitan(L):uTitan(F)	Chroakolemma pellucida	5534	3663	9197
sp399	117.232	1.80235	0.651055	2.76836	0.00563392	0.0403477	Bacteria	Bacteria_none	Proteobacteria	Gammaproteobacteria	Thiotrichales	Francisellaceae	Pseudofrancisella	Pseudofrancisella aestuarii	Mangrove: Sediment	uTitan(L):Qiagen	Pseudofrancisella aestuarii	1048	147	1195
sp340	68.0692	1.79712	0.456332	3.93818	8.21E-05	0.00105483	Bacteria	Bacteria_none	Proteobacteria	Gammaproteobacteria	Alteromonadales	Alteromonadaceae	Alteromonas	Alteromonas sediminis	Mangrove: Water	uTitan(L):Qiagen	Alteromonas sediminis	613	85	698
sp52	1093.73	1.78309	0.523501	3.40608	0.000659023	0.0113515	Bacteria	Bacteria_none	Cyanobacteria	Cyanobacteria_Incertae_sedis	Pseudanabaenales	Leptolyngbyaceae	Chroakolemma	Chroakolemma pellucida	Mangrove: Water	uTitan(L):uTitan(F)	Chroakolemma pellucida	10932	1303	12235
sp148	2049.89	1.77775	0.240626	7.38801	1.49E-13	1.78E-11	Bacteria	Bacteria_none	Bacteroidota	Flavobacteriia	Flavobacteriales	Flavobacteriaceae	Muricauda	Muricauda ruestringensis	Coral-W	uTitan(L):uTitan(F)	Muricauda ruestringensis	4233	2753	6986
sp552	93.3532	1.75855	0.364569	4.82365	1.41E-06	3.70E-05	Bacteria	Bacteria_none	Proteobacteria	Alphaproteobacteria	Sphingomonadales	Erythrobacteraceae	Alteriqipengyuania	Alteriqipengyuania abyssalis	Mangrove: Water	uTitan(L):Qiagen	Alteriqipengyuania abyssalis	843	117	960
sp875	59.7988	1.7303	0.438477	3.94615	7.94E-05	0.00103401	Bacteria	Bacteria_none	Proteobacteria	Alphaproteobacteria	Hyphomicrobiales	Hyphomicrobiaceae	Rhodoplanes	Rhodoplanes serenus	Mangrove: Water	uTitan(L):Qiagen	Rhodoplanes serenus	541	77	618
sp89	228.788	1.71135	0.519956	3.29133	0.000997138	0.0166654	Bacteria	Bacteria_none	Proteobacteria	Gammaproteobacteria	Chromatiales	Granulosicoccaceae	Granulosicoccus	Granulosicoccus marinus	Coral-W	uTitan(L):Qiagen	Granulosicoccus marinus	1145	134	1279
sp374	286.469	1.70263	0.462056	3.6849	0.000228794	0.00485748	Bacteria	Bacteria_none	Bacteroidota	Flavobacteriia	Flavobacteriales	Flavobacteriaceae	Citreitalea	Citreitalea marina	Coral-W	uTitan(L):Qiagen	Citreitalea marina	1448	170	1618
sp546	209.986	1.69158	0.560857	3.01607	0.00256077	0.016615	Bacteria	Bacteria_none	Actinobacteria	Actinomycetia	Micrococcales	Microbacteriaceae	Pontimonas	Pontimonas salivibrio	Mangrove: Water	uTitan(L):Qiagen	Pontimonas salivibrio	1916	278	2194
sp51	2387.49	1.68375	0.196062	8.58788	8.86E-18	2.28E-15	Bacteria	Bacteria_none	Proteobacteria	Alphaproteobacteria	Rhodobacterales	Rhodobacteraceae	Pseudohalocynthiibacter	Pseudohalocynthiibacter aestuariivivens	Coral-W	uTitan(L):uTitan(F)	Pseudohalocynthiibacter aestuariivivens	4870	3473	8343
sp661	196.959	1.64936	0.597619	2.75988	0.00578227	0.0490222	Bacteria	Bacteria_none	Proteobacteria	Alphaproteobacteria	Rhodobacterales	Rhodobacteraceae	Sinirhodobacter	Sinirhodobacter populi	Coral-W	uTitan(L):uTitan(F)	Sinirhodobacter populi	401	297	698
sp287	428.966	1.60504	0.413834	3.87846	0.000105119	0.00210647	Bacteria	Bacteria_none	Proteobacteria	Alphaproteobacteria	Rhodobacterales	Roseobacteraceae	Maribius	Maribius pelagius	Coral-W	uTitan(L):uTitan(F)	Maribius pelagius	859	651	1510
sp478	236.435	1.58975	0.55878	2.84503	0.00444069	0.0398371	Bacteria	Bacteria_none	Firmicutes	Clostridia	Eubacteriales	Clostridiaceae	Anaeromicrobium	Anaeromicrobium sediminis	Coral-W	uTitan(L):uTitan(F)	Anaeromicrobium sediminis	472	352	824
sp5	2524.52	1.58489	0.354623	4.46924	7.85E-06	0.000158633	Bacteria	Bacteria_none	Bacteroidota	Flavobacteriia	Flavobacteriales	Schleiferiaceae	Phaeocystidibacter	Phaeocystidibacter luteus	Mangrove: Water	uTitan(L):Qiagen	Phaeocystidibacter luteus	22247	3468	25715
sp10	4625.62	1.58316	0.524333	3.01937	0.00253298	0.0295155	Bacteria	Bacteria_none	Firmicutes	Negativicutes	Selenomonadales	Selenomonadaceae	Selenomonas	Selenomonas lacticifex	Mangrove: Water	uTitan(L):uTitan(F)	Selenomonas lacticifex	44753	5983	50736
sp10	10236	1.57178	0.136074	11.5509	7.31E-31	1.13E-27	Bacteria	Bacteria_none	Firmicutes	Negativicutes	Selenomonadales	Selenomonadaceae	Selenomonas	Selenomonas lacticifex	Coral-W	uTitan(L):uTitan(F)	Selenomonas lacticifex	20682	15654	36336
sp186	481.499	1.57113	0.369849	4.24805	2.16E-05	0.00063769	Bacteria	Bacteria_none	Proteobacteria	Alphaproteobacteria	Rhodospirillales	Thalassobaculaceae	Nisaea	Nisaea acidiphila	Coral-W	uTitan(L):Qiagen	Nisaea acidiphila	2400	330	2730
sp301	895.055	1.56953	0.313341	5.00902	5.47E-07	2.22E-05	Bacteria	Bacteria_none	Bacteroidota	Flavobacteriia	Flavobacteriales	Flavobacteriaceae	Seonamhaeicola	Seonamhaeicola aphaedonensis	Coral-W	uTitan(L):uTitan(F)	Seonamhaeicola aphaedonensis	1789	1347	3136
sp584	268.583	1.56414	0.513067	3.04861	0.00229902	0.0244648	Bacteria	Bacteria_none	Cyanobacteria	Cyanobacteria_Incertae_sedis	Chroococcales	Chroococcaceae	Neochroococcus	Neochroococcus gongqingensis	Coral-W	uTitan(L):uTitan(F)	Neochroococcus gongqingensis	541	419	960
sp386	144.374	1.5529	0.45719	3.39662	0.000682231	0.00603041	Bacteria	Bacteria_none	Cyanobacteria	Cyanobacteria_Incertae_sedis	Chroococcidiopsidales	Sinocapsaceae	Sinocapsa	Sinocapsa zengkensis	Mangrove: Water	uTitan(L):Qiagen	Sinocapsa zengkensis	1262	200	1462
sp17	1075.15	1.54981	0.356823	4.34335	1.40E-05	0.000245258	Bacteria	Bacteria_none	Bacteroidota	Flavobacteriia	Flavobacteriales	Flavobacteriaceae	Tenacibaculum	Tenacibaculum insulae	Mangrove: Water	uTitan(L):Qiagen	Tenacibaculum insulae	9420	1508	10928
sp950	303.053	1.54795	0.488395	3.16945	0.00152727	0.0188526	Bacteria	Bacteria_none	Bacteroidota	Flavobacteriia	Flavobacteriales	Flavobacteriaceae	Mesonia	Mesonia aquimarina	Coral-W	uTitan(L):uTitan(F)	Mesonia aquimarina	605	467	1072
sp345	369.053	1.54054	0.441059	3.49282	0.000477942	0.00768193	Bacteria	Bacteria_none	Proteobacteria	Alphaproteobacteria	Rhodobacterales	Roseobacteraceae	Octadecabacter	Octadecabacter arcticus	Coral-W	uTitan(L):uTitan(F)	Octadecabacter arcticus	736	578	1314
sp612	54.2874	1.52672	0.500525	3.05024	0.00228662	0.0151401	Bacteria	Bacteria_none	Bacteroidota	Flavobacteriia	Flavobacteriales	Flavobacteriaceae	Aequorivita	Aequorivita crocea	Mangrove: Water	uTitan(L):Qiagen	Aequorivita crocea	467	78	545
sp429	37.6111	1.49941	0.533457	2.81074	0.00494273	0.0275543	Bacteria	Bacteria_none	Firmicutes	Clostridia	Eubacteriales	Desulfotomaculaceae	Pelotomaculum	Pelotomaculum thermopropionicum	Mangrove: Water	uTitan(L):Qiagen	Pelotomaculum thermopropionicum	326	55	381
sp376	626.494	1.48085	0.346999	4.26758	1.98E-05	0.000525705	Bacteria	Bacteria_none	Bacteroidota	Flavobacteriia	Flavobacteriales	Flavobacteriaceae	Flavobacterium	Flavobacterium granuli	Coral-W	uTitan(L):uTitan(F)	Flavobacterium granuli	1249	1013	2262
sp348	351.471	1.47981	0.453301	3.26452	0.00109652	0.0152426	Bacteria	Bacteria_none	Proteobacteria	Alphaproteobacteria	Rhodobacterales	Roseobacteraceae	Roseovarius	Roseovarius spongiae	Coral-W	uTitan(L):uTitan(F)	Roseovarius spongiae	689	569	1258
sp466	131.562	1.47604	0.364033	4.05469	5.02E-05	0.000705722	Bacteria	Bacteria_none	Cyanobacteria	Cyanobacteria_Incertae_sedis	Oscillatoriales	Vermifilaceae	Leptochromothrix	Leptochromothrix engenei	Mangrove: Water	uTitan(L):Qiagen	Leptochromothrix engenei	1131	191	1322
sp315	379.126	1.4673	0.436604	3.36072	0.000777409	0.0114733	Bacteria	Bacteria_none	Cyanobacteria	Cyanobacteria_Incertae_sedis	Synechococcales	Synechococcales_Incertae_sedis	Thalassoporum	Thalassoporum komareki	Coral-W	uTitan(L):uTitan(F)	Thalassoporum komareki	753	622	1375
sp182	975.281	1.46087	0.284453	5.13571	2.81E-07	1.28E-05	Bacteria	Bacteria_none	Proteobacteria	Alphaproteobacteria	Rhodobacterales	Rhodobacteraceae	Pseudooceanicola	Pseudooceanicola aestuarii	Coral-W	uTitan(L):uTitan(F)	Pseudooceanicola aestuarii	1910	1609	3519
sp326	1084.76	1.45768	0.31657	4.60461	4.13E-06	0.000120309	Bacteria	Bacteria_none	Bacteroidota	Flavobacteriia	Flavobacteriales	Flavobacteriaceae	Aequorivita	Aequorivita sublithincola	Coral-W	uTitan(L):uTitan(F)	Aequorivita sublithincola	2131	1864	3995
sp229	53.6589	1.45293	0.487153	2.98249	0.00285911	0.0179504	Bacteria	Bacteria_none	Proteobacteria	Gammaproteobacteria	Oceanospirillales	Aestuariirhabdaceae	Aestuariirhabdus	Aestuariirhabdus litorea	Mangrove: Water	uTitan(L):Qiagen	Aestuariirhabdus litorea	462	78	540
sp169	2660.74	1.43478	0.194973	7.35886	1.85E-13	2.04E-11	Bacteria	Bacteria_none	Proteobacteria	Alphaproteobacteria	Rhodobacterales	Rhodobacteraceae	Paracoccus	Paracoccus stylophorae	Coral-W	uTitan(L):uTitan(F)	Paracoccus stylophorae	5179	4370	9549
sp324	464.958	1.43104	0.361563	3.95793	7.56E-05	0.00201928	Bacteria	Bacteria_none	Cyanobacteria	Cyanobacteria_Incertae_sedis	Oscillatoriales	Sirenicapillariaceae	Neolyngbya	Neolyngbya tenuis	Coral-W	uTitan(L):Qiagen	Neolyngbya tenuis	2243	323	2566
sp90	873.345	1.41427	0.297125	4.75984	1.94E-06	6.36E-05	Bacteria	Bacteria_none	Bacteroidota	Cytophagia	Cytophagales	Reichenbachiellaceae	Reichenbachiella	Reichenbachiella agariperforans	Coral-W	uTitan(L):uTitan(F)	Reichenbachiella agariperforans	1706	1478	3184
sp99	236.271	1.39127	0.319042	4.36079	1.30E-05	0.000230764	Bacteria	Bacteria_none	Bacteroidota	Flavobacteriia	Flavobacteriales	Schleiferiaceae	Croceimicrobium	Croceimicrobium hydrocarbonivorans	Mangrove: Water	uTitan(L):Qiagen	Croceimicrobium hydrocarbonivorans	2006	361	2367
sp589	98.5913	1.38588	0.394908	3.50937	0.000449164	0.0043867	Bacteria	Bacteria_none	Proteobacteria	Alphaproteobacteria	Hyphomicrobiales	Hyphomicrobiales_Incertae_sedis	Flaviflagellibacter	Flaviflagellibacter deserti	Mangrove: Water	uTitan(L):Qiagen	Flaviflagellibacter deserti	839	150	989
sp25	5449.72	1.3766	0.151428	9.09073	9.84E-20	3.04E-17	Bacteria	Bacteria_none	Proteobacteria	Alphaproteobacteria	Rhodobacterales	Roseobacteraceae	Roseovarius	Roseovarius arcticus	Coral-W	uTitan(L):uTitan(F)	Roseovarius arcticus	10545	9232	19777
sp897	77.6564	1.36149	0.433631	3.13975	0.0016909	0.0119721	Bacteria	Bacteria_none	Proteobacteria	Alphaproteobacteria	Rhodobacterales	Rhodobacteraceae	Pseudooctadecabacter	Pseudooctadecabacter jejudonensis	Mangrove: Water	uTitan(L):Qiagen	Pseudooctadecabacter jejudonensis	654	123	777
sp519	121.275	1.35399	0.329285	4.11192	3.92E-05	0.00055973	Bacteria	Bacteria_none	Tenericutes	Mollicutes	Mycoplasmatales	Mycoplasmataceae	Mycoplasma	Mycoplasma phocoenae	Mangrove: Water	uTitan(L):Qiagen	Mycoplasma phocoenae	1024	192	1216
sp143	1005.69	1.34572	0.286085	4.70394	2.55E-06	7.88E-05	Bacteria	Bacteria_none	Proteobacteria	Alphaproteobacteria	Rhodobacterales	Roseobacteraceae	Tropicimonas	Tropicimonas sediminicola	Coral-W	uTitan(L):uTitan(F)	Tropicimonas sediminicola	1919	1727	3646
sp394	270.332	1.33011	0.444696	2.99105	0.0027802	0.0175687	Bacteria	Bacteria_none	Cyanobacteria	Cyanobacteria_Incertae_sedis	Pseudanabaenales	Leptolyngbyaceae	Pinocchia	Pinocchia polymorpha	Mangrove: Water	uTitan(L):Qiagen	Pinocchia polymorpha	2296	426	2722
sp732	55.8278	1.32486	0.442506	2.99399	0.00275352	0.0175667	Bacteria	Bacteria_none	Proteobacteria	Gammaproteobacteria	Legionellales	Legionellaceae	Legionella	Legionella nagasakiensis	Mangrove: Water	uTitan(L):Qiagen	Legionella nagasakiensis	472	89	561
sp53	1549.67	1.3091	0.236905	5.52583	3.28E-08	2.11E-06	Bacteria	Bacteria_none	Proteobacteria	Alphaproteobacteria	Rhodobacterales	Rhodobacteraceae	Arenibacterium	Arenibacterium arenosum	Coral-W	uTitan(L):uTitan(F)	Arenibacterium arenosum	2943	2715	5658
sp951	97.7015	1.30191	0.380143	3.4248	0.000615254	0.00557754	Bacteria	Bacteria_none	Proteobacteria	Alphaproteobacteria	Rhodobacterales	Rhodobacteraceae	Cognatiyoonia	Cognatiyoonia koreensis	Mangrove: Water	uTitan(L):Qiagen	Cognatiyoonia koreensis	811	158	969
sp99	1820.05	1.30033	0.222634	5.84064	5.20E-09	3.82E-07	Bacteria	Bacteria_none	Bacteroidota	Flavobacteriia	Flavobacteriales	Schleiferiaceae	Croceimicrobium	Croceimicrobium hydrocarbonivorans	Coral-W	uTitan(L):uTitan(F)	Croceimicrobium hydrocarbonivorans	3445	3214	6659
sp237	130.692	1.29662	0.344331	3.76562	0.000166137	0.00188867	Bacteria	Bacteria_none	Proteobacteria	Alphaproteobacteria	Hyphomicrobiales	Devosiaceae	Maritalea	Maritalea mobilis	Mangrove: Water	uTitan(L):Qiagen	Maritalea mobilis	1090	209	1299
sp124	413.698	1.28607	0.267106	4.81485	1.47E-06	3.81E-05	Bacteria	Bacteria_none	Proteobacteria	Alphaproteobacteria	Hyphomicrobiales	Devosiaceae	Devosia	Devosia subaequoris	Mangrove: Water	uTitan(L):Qiagen	Devosia subaequoris	3428	655	4083
sp480	131.019	1.25775	0.330036	3.81096	0.000138427	0.00162756	Bacteria	Bacteria_none	Proteobacteria	Alphaproteobacteria	Rhodobacterales	Rhodobacteraceae	Rhodovulum	Rhodovulum tesquicola	Mangrove: Water	uTitan(L):Qiagen	Rhodovulum tesquicola	1086	218	1304
sp55	760.115	1.25269	0.240778	5.20268	1.96E-07	6.93E-06	Bacteria	Bacteria_none	Bacteroidota	Saprospiria	Saprospirales	Lewinellaceae	Neolewinella	Neolewinella lacunae	Mangrove: Water	uTitan(L):Qiagen	Neolewinella lacunae	6250	1228	7478
sp533	58.1698	1.23109	0.442683	2.78097	0.00541959	0.0297847	Bacteria	Bacteria_none	Proteobacteria	Alphaproteobacteria	Hyphomicrobiales	Hyphomicrobiaceae	Methyloligella	Methyloligella halotolerans	Mangrove: Water	uTitan(L):Qiagen	Methyloligella halotolerans	478	96	574
sp389	76.0615	1.21494	0.430911	2.81947	0.00481034	0.0269713	Bacteria	Bacteria_none	Bacteroidota	Bacteroidia	Bacteroidales	Dysgonomonadaceae	Dysgonomonas	Dysgonomonas capnocytophagoides	Mangrove: Water	uTitan(L):Qiagen	Dysgonomonas capnocytophagoides	630	128	758
sp152	118.233	1.21205	0.323302	3.74898	0.000177556	0.00200267	Bacteria	Bacteria_none	Proteobacteria	Gammaproteobacteria	Gammaproteobacteria_Incertae_sedis	Gammaproteobacteria_Incertae_sedis_Incertae_sedis	Pseudohongiella	Pseudohongiella spirulinae	Mangrove: Water	uTitan(L):Qiagen	Pseudohongiella spirulinae	971	197	1168
sp602	50.6619	1.21132	0.457237	2.64922	0.00806777	0.0411063	Bacteria	Bacteria_none	Proteobacteria	Alphaproteobacteria	Hyphomicrobiales	Xanthobacteraceae	Starkeya	Starkeya novella	Mangrove: Water	uTitan(L):Qiagen	Starkeya novella	415	84	499
sp43	3968.41	1.2105	0.163866	7.38712	1.50E-13	1.78E-11	Bacteria	Bacteria_none	Proteobacteria	Alphaproteobacteria	Rhodobacterales	Roseobacteraceae	Donghicola	Donghicola eburneus	Coral-W	uTitan(L):uTitan(F)	Donghicola eburneus	7407	7364	14771
sp471	440.579	1.20938	0.406732	2.97341	0.00294512	0.0291302	Bacteria	Bacteria_none	Bacteroidota	Flavobacteriia	Flavobacteriales	Flavobacteriaceae	Flavobacterium	Flavobacterium silvisoli	Coral-W	uTitan(L):uTitan(F)	Flavobacterium silvisoli	824	810	1634
sp105	463.068	1.2073	0.302283	3.99394	6.50E-05	0.000875486	Bacteria	Bacteria_none	Cyanobacteria	Cyanobacteria_Incertae_sedis	Oscillatoriales	Cyanothecaceae	Cyanothece	Cyanothece aeruginosa	Mangrove: Water	uTitan(L):Qiagen	Cyanothece aeruginosa	3783	766	4549
sp331	910.562	1.19821	0.291728	4.1073	4.00E-05	0.000895184	Bacteria	Bacteria_none	Bacteroidota	Flavobacteriia	Flavobacteriales	Flavobacteriaceae	Flavobacterium	Flavobacterium filum	Coral-W	uTitan(L):uTitan(F)	Flavobacterium filum	1701	1686	3387
sp12	1704.92	1.19139	0.204776	5.81801	5.96E-09	4.11E-07	Bacteria	Bacteria_none	Cyanobacteria	Cyanobacteria_Incertae_sedis	Synechococcales	Prochlorococcaceae	Prochlorococcus	Prochlorococcus marinus	Coral-W	uTitan(L):Qiagen	Prochlorococcus marinus	7866	1383	9249
sp59	65.8058	1.17853	0.407515	2.89199	0.00382811	0.0225405	Bacteria	Bacteria_none	Proteobacteria	Alphaproteobacteria	Rhodospirillales	Rhodospirillaceae	Hwanghaeella	Hwanghaeella grinnelliae	Mangrove: Water	uTitan(L):Qiagen	Hwanghaeella grinnelliae	535	111	646
sp221	964.079	1.17531	0.287767	4.08422	4.42E-05	0.000965978	Bacteria	Bacteria_none	Bacteroidota	Flavobacteriia	Flavobacteriales	Flavobacteriaceae	Maritimimonas	Maritimimonas rapanae	Coral-W	uTitan(L):uTitan(F)	Maritimimonas rapanae	1780	1834	3614
sp265	842.103	1.15503	0.314415	3.67358	0.000239179	0.00424199	Bacteria	Bacteria_none	Bacteroidota	Flavobacteriia	Flavobacteriales	Flavobacteriaceae	Poritiphilus	Poritiphilus flavus	Coral-W	uTitan(L):uTitan(F)	Poritiphilus flavus	1564	1566	3130
sp283	144.988	1.13825	0.348165	3.26929	0.0010782	0.00846841	Bacteria	Bacteria_none	Proteobacteria	Alphaproteobacteria	Hyphomicrobiales	Rhodovibrionaceae	Limimonas	Limimonas halophila	Mangrove: Water	uTitan(L):Qiagen	Limimonas halophila	1169	247	1416
sp121	507.446	1.13088	0.40464	2.79477	0.00519368	0.045276	Bacteria	Bacteria_none	Cyanobacteria	Cyanobacteria_Incertae_sedis	Nostocales	Hapalosiphonaceae	Fischerella	Fischerella indica	Coral-W	uTitan(L):uTitan(F)	Fischerella indica	936	1016	1952
sp550	75.9042	1.09578	0.421358	2.6006	0.00930618	0.0466177	Bacteria	Bacteria_none	Proteobacteria	Gammaproteobacteria	Cardiobacteriales	Cardiobacteriaceae	Suttonella	Suttonella indologenes	Mangrove: Water	uTitan(L):Qiagen	Suttonella indologenes	606	132	738
sp13	27787.6	1.07908	0.139627	7.72828	1.09E-14	1.53E-12	Bacteria	Bacteria_none	Proteobacteria	Alphaproteobacteria	Rhodobacterales	Rhodobacteraceae	Frigidibacter	Frigidibacter oleivorans	Coral-W	uTitan(L):uTitan(F)	Frigidibacter oleivorans	50143	53719	103862
sp28	3557.91	1.0775	0.173589	6.20716	5.39E-10	4.62E-08	Bacteria	Bacteria_none	Bacteroidota	Cytophagia	Cytophagales	Cytophagaceae	Chryseosolibacter	Chryseosolibacter histidini	Coral-W	uTitan(L):uTitan(F)	Chryseosolibacter histidini	6531	7081	13612
sp313	97.9479	1.04746	0.325839	3.21466	0.00130599	0.00985842	Bacteria	Bacteria_none	Kiritimatiellaeota	Tichowtungiia	Tichowtungiales	Tichowtungiaceae	Tichowtungia	Tichowtungia aerotolerans	Mangrove: Water	uTitan(L):Qiagen	Tichowtungia aerotolerans	776	178	954
sp74	1290.34	1.04256	0.249534	4.17802	2.94E-05	0.000718087	Bacteria	Bacteria_none	Proteobacteria	Alphaproteobacteria	Rhodobacterales	Rhodobacteraceae	Paracoccus	Paracoccus mutanolyticus	Coral-W	uTitan(L):uTitan(F)	Paracoccus mutanolyticus	2328	2584	4912
sp55	567.281	1.02479	0.344874	2.9715	0.00296354	0.0394619	Bacteria	Bacteria_none	Bacteroidota	Saprospiria	Saprospirales	Lewinellaceae	Neolewinella	Neolewinella lacunae	Coral-W	uTitan(L):Qiagen	Neolewinella lacunae	2525	466	2991
sp115	1407.4	1.01767	0.246401	4.13015	3.63E-05	0.000824452	Bacteria	Bacteria_none	Bacteroidota	Flavobacteriia	Flavobacteriales	Flavobacteriaceae	Maribacter	Maribacter arenosus	Coral-W	uTitan(L):uTitan(F)	Maribacter arenosus	2536	2821	5357
sp27	1294.51	0.996067	0.237261	4.1982	2.69E-05	0.000419426	Bacteria	Bacteria_none	Proteobacteria	Alphaproteobacteria	Rhodospirillales	Thalassobaculaceae	Oceanibaculum	Oceanibaculum indicum	Mangrove: Water	uTitan(L):Qiagen	Oceanibaculum indicum	10111	2358	12469
sp17	16621.2	0.995551	0.135945	7.32316	2.42E-13	2.49E-11	Bacteria	Bacteria_none	Bacteroidota	Flavobacteriia	Flavobacteriales	Flavobacteriaceae	Tenacibaculum	Tenacibaculum insulae	Coral-W	uTitan(L):uTitan(F)	Tenacibaculum insulae	29309	34137	63446
sp7	21291.8	0.956766	0.119207	8.02611	1.01E-15	1.72E-13	Bacteria	Bacteria_none	Bacteroidota	Flavobacteriia	Flavobacteriales	Flavobacteriaceae	Zunongwangia	Zunongwangia flava	Coral-W	uTitan(L):uTitan(F)	Zunongwangia flava	37745	43986	81731
sp311	751.139	0.905471	0.317466	2.85219	0.00434198	0.0394098	Bacteria	Bacteria_none	Bacteroidota	Flavobacteriia	Flavobacteriales	Flavobacteriaceae	Flavobacterium	Flavobacterium laiguense	Coral-W	uTitan(L):uTitan(F)	Flavobacterium laiguense	1310	1599	2909
sp57	587.556	0.90236	0.300197	3.0059	0.002648	0.0171237	Bacteria	Bacteria_none	Proteobacteria	Deltaproteobacteria	Desulfobacterales	Desulfobacteraceae	Desulfatirhabdium	Desulfatirhabdium butyrativorans	Mangrove: Water	uTitan(L):Qiagen	Desulfatirhabdium butyrativorans	4484	1107	5591
sp226	224.759	0.875684	0.283388	3.09005	0.00200123	0.0136704	Bacteria	Bacteria_none	Proteobacteria	Alphaproteobacteria	Rhodospirillales	Rhodospirillaceae	Hypericibacter	Hypericibacter adhaerens	Mangrove: Water	uTitan(L):Qiagen	Hypericibacter adhaerens	1705	434	2139
sp481	125.159	0.870556	0.323213	2.69345	0.0070717	0.0366821	Bacteria	Bacteria_none	Cyanobacteria	Cyanobacteria_Incertae_sedis	Chroococcales	Geminocystaceae	Geminobacterium	Geminobacterium atlanticum	Mangrove: Water	uTitan(L):Qiagen	Geminobacterium atlanticum	948	244	1192
sp252	430.823	0.869894	0.320881	2.71095	0.00670901	0.0350822	Bacteria	Bacteria_none	Proteobacteria	Alphaproteobacteria	Rhodospirillales	Rhodospirillaceae	Caenispirillum	Caenispirillum bisanense	Mangrove: Water	uTitan(L):Qiagen	Caenispirillum bisanense	3273	836	4109
sp42	3916.39	0.856072	0.178075	4.80738	1.53E-06	5.13E-05	Bacteria	Bacteria_none	Proteobacteria	Gammaproteobacteria	Cellvibrionales	Halieaceae	Halioglobus	Halioglobus japonicus	Coral-W	uTitan(L):uTitan(F)	Halioglobus japonicus	6708	8457	15165
sp5	28003.5	0.841436	0.124641	6.75086	1.47E-11	1.33E-09	Bacteria	Bacteria_none	Bacteroidota	Flavobacteriia	Flavobacteriales	Schleiferiaceae	Phaeocystidibacter	Phaeocystidibacter luteus	Coral-W	uTitan(L):uTitan(F)	Phaeocystidibacter luteus	47678	61673	109351
sp27	1807.85	0.839307	0.195442	4.29441	1.75E-05	0.000537158	Bacteria	Bacteria_none	Proteobacteria	Alphaproteobacteria	Rhodospirillales	Thalassobaculaceae	Oceanibaculum	Oceanibaculum indicum	Coral-W	uTitan(L):Qiagen	Oceanibaculum indicum	7685	1677	9362
sp202	156.839	0.796623	0.308366	2.58337	0.00978401	0.0485958	Bacteria	Bacteria_none	Proteobacteria	Alphaproteobacteria	Hyphomicrobiales	Reyranellaceae	Reyranella	Reyranella aquatilis	Mangrove: Water	uTitan(L):Qiagen	Reyranella aquatilis	1163	317	1480
sp110	690.685	0.767823	0.206439	3.71937	0.000199718	0.00220216	Bacteria	Bacteria_none	Proteobacteria	Alphaproteobacteria	Hyphomicrobiales	Phyllobacteriaceae	Thalassocola	Thalassocola ureilytica	Mangrove: Water	uTitan(L):Qiagen	Thalassocola ureilytica	5094	1407	6501
sp2	43938	0.752553	0.187861	4.00589	6.18E-05	0.000844091	Bacteria	Bacteria_none	Proteobacteria	Alphaproteobacteria	Pelagibacterales	Pelagibacteraceae	Candidatus Pelagibacter	Candidatus Pelagibacter ubique	Mangrove: Water	uTitan(L):Qiagen	Candidatus Pelagibacter ubique	323959	90060	414019
sp6	7667.52	0.749922	0.153864	4.87392	1.09E-06	3.99E-05	Bacteria	Bacteria_none	Proteobacteria	Alphaproteobacteria	Rhodobacterales	Rhodobacteraceae	Tritonibacter	Tritonibacter mobilis	Coral-W	uTitan(L):uTitan(F)	Tritonibacter mobilis	12822	17264	30086
sp9	11150.1	0.730415	0.139679	5.22926	1.70E-07	8.21E-06	Bacteria	Bacteria_none	Bacteroidota	Flavobacteriia	Flavobacteriales	Flavobacteriaceae	Flavobacterium	Flavobacterium psychrophilum	Coral-W	uTitan(L):uTitan(F)	Flavobacterium psychrophilum	18645	25327	43972
sp128	1003.37	0.689194	0.219244	3.1435	0.00166938	0.0118918	Bacteria	Bacteria_none	Proteobacteria	Alphaproteobacteria	Rhodospirillales	Stellaceae	Constrictibacter	Constrictibacter antarcticus	Mangrove: Water	uTitan(L):Qiagen	Constrictibacter antarcticus	7287	2153	9440
sp2	31518.1	0.665832	0.105512	6.31046	2.78E-10	2.30E-08	Bacteria	Bacteria_none	Proteobacteria	Alphaproteobacteria	Pelagibacterales	Pelagibacteraceae	Candidatus Pelagibacter	Candidatus Pelagibacter ubique	Coral-W	uTitan(L):Qiagen	Candidatus Pelagibacter ubique	128397	31156	159553
sp17	7347.08	0.655764	0.136578	4.80139	1.58E-06	8.15E-05	Bacteria	Bacteria_none	Bacteroidota	Flavobacteriia	Flavobacteriales	Flavobacteriaceae	Tenacibaculum	Tenacibaculum insulae	Coral-W	uTitan(L):Qiagen	Tenacibaculum insulae	29309	7484	36793
sp40	1027.19	0.609208	0.16308	3.73564	0.000187235	0.00208756	Bacteria	Bacteria_none	Actinobacteria	Acidimicrobiia	Acidimicrobiales	Ilumatobacteraceae	Ilumatobacter	Ilumatobacter fluminis	Mangrove: Water	uTitan(L):Qiagen	Ilumatobacter fluminis	7293	2246	9539
sp5	12274	0.552444	0.120444	4.58673	4.50E-06	0.000172242	Bacteria	Bacteria_none	Bacteroidota	Flavobacteriia	Flavobacteriales	Schleiferiaceae	Phaeocystidibacter	Phaeocystidibacter luteus	Coral-W	uTitan(L):Qiagen	Phaeocystidibacter luteus	47678	13103	60781
sp200	472.477	0.526278	0.204492	2.57359	0.0100649	0.049811	Bacteria	Bacteria_none	Proteobacteria	Alphaproteobacteria	Rhodobacterales	Rhodobacteraceae	Marimonas	Marimonas arenosa	Mangrove: Water	uTitan(L):Qiagen	Marimonas arenosa	3260	1076	4336
sp16	7560.85	0.496087	0.145518	3.40912	0.000651736	0.00976339	Bacteria	Bacteria_none	Bacteroidota	Flavobacteriia	Flavobacteriales	Flavobacteriaceae	Aquibacter	Aquibacter zeaxanthinifaciens	Coral-W	uTitan(L):uTitan(F)	Aquibacter zeaxanthinifaciens	11871	19002	30873
sp11	10004.2	0.487863	0.150963	3.23168	0.00123066	0.0165123	Bacteria	Bacteria_none	Proteobacteria	Gammaproteobacteria	Oceanospirillales	Oceanospirillaceae	Neptunomonas	Neptunomonas acidivorans	Coral-W	uTitan(L):uTitan(F)	Neptunomonas acidivorans	15767	25043	40810
sp50	1370.72	0.462544	0.165539	2.79416	0.00520341	0.0287596	Bacteria	Bacteria_none	Proteobacteria	Alphaproteobacteria	Rhodobacterales	Rhodobacteraceae	Marinibacterium	Marinibacterium profundimaris	Mangrove: Water	uTitan(L):Qiagen	Marinibacterium profundimaris	9310	3205	12515
sp53	1769.5	0.432461	0.154246	2.80371	0.00505189	0.0280822	Bacteria	Bacteria_none	Proteobacteria	Alphaproteobacteria	Rhodobacterales	Rhodobacteraceae	Arenibacterium	Arenibacterium arenosum	Mangrove: Water	uTitan(L):Qiagen	Arenibacterium arenosum	11874	4185	16059
sp1	82075.9	-0.356558	0.113415	-3.14382	0.00166756	0.0197927	Bacteria	Bacteria_none	Cyanobacteria	Cyanobacteria_Incertae_sedis	Synechococcales	Prochlorococcaceae	Parasynechococcus	Parasynechococcus marenigrum	Coral-W	uTitan(L):uTitan(F)	Parasynechococcus marenigrum	97381	286816	384197
sp10	7333.1	-0.437799	0.149488	-2.92865	0.0034044	0.0432243	Bacteria	Bacteria_none	Firmicutes	Negativicutes	Selenomonadales	Selenomonadaceae	Selenomonas	Selenomonas lacticifex	Coral-W	uTitan(L):Qiagen	Selenomonas lacticifex	20682	10582	31264
sp7	13451	-0.439281	0.101348	-4.3344	1.46E-05	0.000465462	Bacteria	Bacteria_none	Bacteroidota	Flavobacteriia	Flavobacteriales	Flavobacteriaceae	Zunongwangia	Zunongwangia flava	Coral-W	uTitan(L):Qiagen	Zunongwangia flava	37745	20341	58086
sp9	7337.28	-0.45813	0.154371	-2.96772	0.00300022	0.0184775	Bacteria	Bacteria_none	Bacteroidota	Flavobacteriia	Flavobacteriales	Flavobacteriaceae	Flavobacterium	Flavobacterium psychrophilum	Mangrove: Water	uTitan(L):Qiagen	Flavobacterium psychrophilum	36120	23638	59758
sp140	820.179	-0.499562	0.175884	-2.8403	0.00450715	0.0256979	Bacteria	Bacteria_none	Bacteroidota	Flavobacteriia	Flavobacteriales	Flavobacteriaceae	Salinimicrobium	Salinimicrobium marinum	Mangrove: Water	uTitan(L):Qiagen	Salinimicrobium marinum	3988	2680	6668
sp1	51456.2	-0.532754	0.145916	-3.6511	0.000261124	0.002743	Bacteria	Bacteria_none	Cyanobacteria	Cyanobacteria_Incertae_sedis	Synechococcales	Prochlorococcaceae	Parasynechococcus	Parasynechococcus marenigrum	Mangrove: Water	uTitan(L):Qiagen	Parasynechococcus marenigrum	246793	169059	415852
sp24	3478.96	-0.616569	0.148385	-4.15519	3.25E-05	0.000927984	Bacteria	Bacteria_none	Bacteroidota	Flavobacteriia	Flavobacteriales	Flavobacteriaceae	Pseudofulvibacter	Pseudofulvibacter geojedonensis	Coral-W	uTitan(L):Qiagen	Pseudofulvibacter geojedonensis	9083	5496	14579
sp27	7234.75	-0.61897	0.148846	-4.15845	3.20E-05	0.00076062	Bacteria	Bacteria_none	Proteobacteria	Alphaproteobacteria	Rhodospirillales	Thalassobaculaceae	Oceanibaculum	Oceanibaculum indicum	Coral-W	uTitan(L):uTitan(F)	Oceanibaculum indicum	7685	26523	34208
sp16	5338.56	-0.620772	0.143429	-4.32808	1.50E-05	0.000258237	Bacteria	Bacteria_none	Bacteroidota	Flavobacteriia	Flavobacteriales	Flavobacteriaceae	Aquibacter	Aquibacter zeaxanthinifaciens	Mangrove: Water	uTitan(L):Qiagen	Aquibacter zeaxanthinifaciens	24706	18030	42736
sp16	4570.34	-0.625855	0.136494	-4.58523	4.53E-06	0.000172242	Bacteria	Bacteria_none	Bacteroidota	Flavobacteriia	Flavobacteriales	Flavobacteriaceae	Aquibacter	Aquibacter zeaxanthinifaciens	Coral-W	uTitan(L):Qiagen	Aquibacter zeaxanthinifaciens	11871	7315	19186
sp9	7256.82	-0.648754	0.117959	-5.49982	3.80E-08	2.25E-06	Bacteria	Bacteria_none	Bacteroidota	Flavobacteriia	Flavobacteriales	Flavobacteriaceae	Flavobacterium	Flavobacterium psychrophilum	Coral-W	uTitan(L):Qiagen	Flavobacterium psychrophilum	18645	11654	30299
sp265	244.717	-0.659102	0.226768	-2.9065	0.00365498	0.0216179	Bacteria	Bacteria_none	Bacteroidota	Flavobacteriia	Flavobacteriales	Flavobacteriaceae	Poritiphilus	Poritiphilus flavus	Mangrove: Water	uTitan(L):Qiagen	Poritiphilus flavus	1112	834	1946
sp55	2445.04	-0.691992	0.205979	-3.35953	0.000780753	0.0114733	Bacteria	Bacteria_none	Bacteroidota	Saprospiria	Saprospirales	Lewinellaceae	Neolewinella	Neolewinella lacunae	Coral-W	uTitan(L):uTitan(F)	Neolewinella lacunae	2525	9126	11651
sp263	217.528	-0.708994	0.273413	-2.59312	0.00951096	0.0474325	Bacteria	Bacteria_none	Proteobacteria	Epsilonproteobacteria	Campylobacterales	Helicobacteraceae	Helicobacter	Helicobacter anatolicus	Mangrove: Water	uTitan(L):Qiagen	Helicobacter anatolicus	966	762	1728
sp192	771.013	-0.714015	0.211299	-3.37917	0.000727039	0.0063534	Bacteria	Bacteria_none	Bacteroidota	Flavobacteriia	Flavobacteriales	Flavobacteriaceae	Flavobacterium	Flavobacterium swingsii	Mangrove: Water	uTitan(L):Qiagen	Flavobacterium swingsii	3426	2677	6103
sp426	364.033	-0.725151	0.195361	-3.71185	0.000205753	0.00225515	Bacteria	Bacteria_none	Bacteroidota	Flavobacteriia	Flavobacteriales	Flavobacteriaceae	Lutibacter	Lutibacter oricola	Mangrove: Water	uTitan(L):Qiagen	Lutibacter oricola	1612	1259	2871
sp45	1991.48	-0.745978	0.149911	-4.97613	6.49E-07	1.82E-05	Bacteria	Bacteria_none	Bacteroidota	Flavobacteriia	Flavobacteriales	Flavobacteriaceae	Robiginitalea	Robiginitalea sediminis	Mangrove: Water	uTitan(L):Qiagen	Robiginitalea sediminis	8711	6945	15656
sp45	1115.82	-0.746081	0.241078	-3.09477	0.00196968	0.0286122	Bacteria	Bacteria_none	Bacteroidota	Flavobacteriia	Flavobacteriales	Flavobacteriaceae	Robiginitalea	Robiginitalea sediminis	Coral-W	uTitan(L):Qiagen	Robiginitalea sediminis	2775	1839	4614
sp295	342.977	-0.763635	0.206688	-3.69463	0.000220205	0.00236389	Bacteria	Bacteria_none	Bacteroidota	Flavobacteriia	Flavobacteriales	Flavobacteriaceae	Siansivirga	Siansivirga jejuensis	Mangrove: Water	uTitan(L):Qiagen	Siansivirga jejuensis	1490	1204	2694
sp499	137.489	-0.764429	0.29132	-2.62402	0.0086899	0.0439021	Bacteria	Bacteria_none	Bacteroidota	Flavobacteriia	Flavobacteriales	Flavobacteriaceae	Muricauda	Muricauda hymeniacidonis	Mangrove: Water	uTitan(L):Qiagen	Muricauda hymeniacidonis	597	479	1076
sp1	40560	-0.825739	0.107664	-7.66958	1.73E-14	1.79E-12	Bacteria	Bacteria_none	Cyanobacteria	Cyanobacteria_Incertae_sedis	Synechococcales	Prochlorococcaceae	Parasynechococcus	Parasynechococcus marenigrum	Coral-W	uTitan(L):Qiagen	Parasynechococcus marenigrum	97381	69324	166705
sp179	352.778	-0.8722	0.316799	-2.75316	0.00590223	0.0318026	Bacteria	Bacteria_none	Proteobacteria	Deltaproteobacteria	Desulfobacterales	Desulfocapsaceae	Desulfofustis	Desulfofustis glycolicus	Mangrove: Water	uTitan(L):Qiagen	Desulfofustis glycolicus	1464	1252	2716
sp23	1247.19	-0.950368	0.239837	-3.96256	7.41E-05	0.00201928	Bacteria	Bacteria_none	Actinobacteria	Actinomycetia	Micrococcales	Ornithinimicrobiaceae	Ornithinimicrobium	Ornithinimicrobium laminariae	Coral-W	uTitan(L):Qiagen	Ornithinimicrobium laminariae	2830	2216	5046
sp527	122.97	-0.960869	0.315382	-3.04669	0.0023138	0.0152679	Bacteria	Bacteria_none	Actinobacteria	Actinomycetia	Micrococcales	Microbacteriaceae	Microbacterium	Microbacterium gubbeenense	Mangrove: Water	uTitan(L):Qiagen	Microbacterium gubbeenense	492	457	949
sp24	3845.24	-0.966643	0.148184	-6.52325	6.88E-11	4.94E-09	Bacteria	Bacteria_none	Bacteroidota	Flavobacteriia	Flavobacteriales	Flavobacteriaceae	Pseudofulvibacter	Pseudofulvibacter geojedonensis	Mangrove: Water	uTitan(L):Qiagen	Pseudofulvibacter geojedonensis	15266	14108	29374
sp130	1605.99	-0.984625	0.235594	-4.17932	2.92E-05	0.000718087	Bacteria	Bacteria_none	Cyanobacteria	Cyanobacteria_Incertae_sedis	Nostocales	Hapalosiphonaceae	Mastigocoleus	Mastigocoleus testarum	Coral-W	uTitan(L):uTitan(F)	Mastigocoleus testarum	1437	6635	8072
sp450	235.114	-1.02491	0.242033	-4.23458	2.29E-05	0.000363011	Bacteria	Bacteria_none	Bacteroidota	Flavobacteriia	Flavobacteriales	Flavobacteriaceae	Psychroflexus	Psychroflexus saliphilus	Mangrove: Water	uTitan(L):Qiagen	Psychroflexus saliphilus	911	876	1787
sp32	240.225	-1.02696	0.277571	-3.69982	0.000215756	0.0023515	Bacteria	Bacteria_none	Planctomycetota	Planctomycetia	Pirellulales	Pirellulaceae	Aureliella	Aureliella helgolandensis	Mangrove: Water	uTitan(L):Qiagen	Aureliella helgolandensis	929	900	1829
sp124	1260.92	-1.03148	0.276234	-3.73406	0.000188415	0.00342028	Bacteria	Bacteria_none	Proteobacteria	Alphaproteobacteria	Hyphomicrobiales	Devosiaceae	Devosia	Devosia subaequoris	Coral-W	uTitan(L):uTitan(F)	Devosia subaequoris	1114	5052	6166
sp226	772.866	-1.04926	0.332743	-3.15336	0.00161403	0.0193058	Bacteria	Bacteria_none	Proteobacteria	Alphaproteobacteria	Rhodospirillales	Rhodospirillaceae	Hypericibacter	Hypericibacter adhaerens	Coral-W	uTitan(L):uTitan(F)	Hypericibacter adhaerens	681	3117	3798
sp664	69.2299	-1.05168	0.392349	-2.68048	0.00735168	0.0380327	Bacteria	Bacteria_none	Tenericutes	Tenericutes_Incertae_sedis	Mycoplasmoidales	Metamycoplasmataceae	Metamycoplasma	Metamycoplasma gypis	Mangrove: Water	uTitan(L):Qiagen	Metamycoplasma gypis	264	261	525
sp3	12706.5	-1.07094	0.113193	-9.46123	3.04E-21	5.04E-19	Bacteria	Bacteria_none	Actinobacteria	Actinomycetia	Micrococcales	Microbacteriaceae	Huakuichenia	Huakuichenia soli	Coral-W	uTitan(L):Qiagen	Huakuichenia soli	27241	22839	50080
sp49	3736.94	-1.08103	0.175475	-6.16059	7.25E-10	5.89E-08	Bacteria	Bacteria_none	Cyanobacteria	Cyanobacteria_Incertae_sedis	Oscillatoriales	Microcoleaceae	Planktothrix	Planktothrix tepida	Coral-W	uTitan(L):uTitan(F)	Planktothrix tepida	3228	15374	18602
sp718	150.128	-1.15122	0.376775	-3.05546	0.00224712	0.0150325	Bacteria	Bacteria_none	Bacteroidota	Flavobacteriia	Flavobacteriales	Flavobacteriaceae	Bizionia	Bizionia myxarmorum	Mangrove: Water	uTitan(L):Qiagen	Bizionia myxarmorum	540	568	1108
sp199	568.569	-1.16111	0.20705	-5.6079	2.05E-08	8.83E-07	Bacteria	Bacteria_none	Bacteroidota	Flavobacteriia	Flavobacteriales	Flavobacteriaceae	Bizionia	Bizionia arctica	Mangrove: Water	uTitan(L):Qiagen	Bizionia arctica	2060	2203	4263
sp80	288.819	-1.1694	0.241514	-4.84197	1.29E-06	3.42E-05	Bacteria	Bacteria_none	Planctomycetota	Planctomycetia	Pirellulales	Pirellulaceae	Rubripirellula	Rubripirellula lacrimiformis	Mangrove: Water	uTitan(L):Qiagen	Rubripirellula lacrimiformis	1034	1111	2145
sp21	726.587	-1.21569	0.209159	-5.81227	6.16E-09	3.07E-07	Bacteria	Bacteria_none	Planctomycetota	Planctomycetia	Pirellulales	Pirellulaceae	Mariniblastus	Mariniblastus fucicola	Mangrove: Water	uTitan(L):Qiagen	Mariniblastus fucicola	2564	2864	5428
sp1499	63.077	-1.23374	0.437846	-2.81775	0.00483607	0.0270374	Bacteria	Bacteria_none	Firmicutes	Clostridia	Eubacteriales	Clostridiaceae	Clostridium	Clostridium massiliamazoniense	Mangrove: Water	uTitan(L):Qiagen	Clostridium massiliamazoniense	222	247	469
sp939	115.996	-1.24787	0.335512	-3.71929	0.000199784	0.00220216	Bacteria	Bacteria_none	Actinobacteria	Actinomycetia	Corynebacteriales	Nocardiaceae	Nocardia	Nocardia zapadnayensis	Mangrove: Water	uTitan(L):Qiagen	Nocardia zapadnayensis	403	457	860
sp94	2032.92	-1.25609	0.27119	-4.63176	3.63E-06	0.000109693	Bacteria	Bacteria_none	Cyanobacteria	Cyanobacteria_Incertae_sedis	Nostocales	Calotrichaceae	Dulcicalothrix	Dulcicalothrix desertica	Coral-W	uTitan(L):uTitan(F)	Dulcicalothrix desertica	1655	9112	10767
sp1743	53.5247	-1.2854	0.426047	-3.01703	0.00255264	0.016615	Bacteria	Bacteria_none	Bacteroidota	Flavobacteriia	Flavobacteriales	Flavobacteriaceae	Flavobacterium	Flavobacterium cyanobacteriorum	Mangrove: Water	uTitan(L):Qiagen	Flavobacterium cyanobacteriorum	183	212	395
sp225	476.01	-1.29785	0.416103	-3.11907	0.00181425	0.0208909	Bacteria	Bacteria_none	Verrucomicrobia	Opitutae	Puniceicoccales	Puniceicoccaceae	Ruficoccus	Ruficoccus amylovorans	Coral-W	uTitan(L):uTitan(F)	Ruficoccus amylovorans	373	2012	2385
sp23	2785.56	-1.30277	0.157657	-8.26329	1.42E-16	3.05E-14	Bacteria	Bacteria_none	Actinobacteria	Actinomycetia	Micrococcales	Ornithinimicrobiaceae	Ornithinimicrobium	Ornithinimicrobium laminariae	Mangrove: Water	uTitan(L):Qiagen	Ornithinimicrobium laminariae	9427	11066	20493
sp64	231.401	-1.32782	0.263176	-5.04536	4.53E-07	1.31E-05	Bacteria	Bacteria_none	Firmicutes	Bacilli	Lactobacillales	Lactobacillaceae	Lactobacillus	Lactobacillus ultunensis	Mangrove: Water	uTitan(L):Qiagen	Lactobacillus ultunensis	772	928	1700
sp57	1594.94	-1.32862	0.253072	-5.24996	1.52E-07	7.57E-06	Bacteria	Bacteria_none	Proteobacteria	Deltaproteobacteria	Desulfobacterales	Desulfobacteraceae	Desulfatirhabdium	Desulfatirhabdium butyrativorans	Coral-W	uTitan(L):uTitan(F)	Desulfatirhabdium butyrativorans	1213	6821	8034
sp12	10447.5	-1.36673	0.172158	-7.93882	2.04E-15	3.15E-13	Bacteria	Bacteria_none	Cyanobacteria	Cyanobacteria_Incertae_sedis	Synechococcales	Prochlorococcaceae	Prochlorococcus	Prochlorococcus marinus	Coral-W	uTitan(L):uTitan(F)	Prochlorococcus marinus	7866	44687	52553
sp731	149.615	-1.38059	0.271206	-5.09056	3.57E-07	1.10E-05	Bacteria	Bacteria_none	Proteobacteria	Betaproteobacteria	Burkholderiales	Alcaligenaceae	Pelistega	Pelistega europaea	Mangrove: Water	uTitan(L):Qiagen	Pelistega europaea	485	601	1086
sp3	28401.5	-1.38578	0.157237	-8.81333	1.21E-18	2.95E-16	Bacteria	Bacteria_none	Actinobacteria	Actinomycetia	Micrococcales	Microbacteriaceae	Huakuichenia	Huakuichenia soli	Mangrove: Water	uTitan(L):Qiagen	Huakuichenia soli	92235	114816	207051
sp1589	45.621	-1.39092	0.473903	-2.93503	0.00333517	0.0202194	Bacteria	Bacteria_none	Firmicutes	Clostridia	Eubacteriales	Clostridiaceae	Wukongibacter	Wukongibacter baidiensis	Mangrove: Water	uTitan(L):Qiagen	Wukongibacter baidiensis	147	185	332
sp249	995.771	-1.39332	0.330477	-4.21607	2.49E-05	0.000639314	Bacteria	Bacteria_none	Proteobacteria	Alphaproteobacteria	Hyphomicrobiales	Methylocystaceae	Methylocystis	Methylocystis hirsuta	Coral-W	uTitan(L):uTitan(F)	Methylocystis hirsuta	721	4596	5317
sp1276	51.716	-1.39792	0.435788	-3.2078	0.00133756	0.0100188	Bacteria	Bacteria_none	Bacteroidota	Flavobacteriia	Flavobacteriales	Flavobacteriaceae	Flavobacterium	Flavobacterium hydrocarbonoxydans	Mangrove: Water	uTitan(L):Qiagen	Flavobacterium hydrocarbonoxydans	166	208	374
sp691	172.536	-1.40219	0.266664	-5.25826	1.45E-07	5.22E-06	Bacteria	Bacteria_none	Actinobacteria	Actinomycetia	Corynebacteriales	Nocardiaceae	Nocardia	Nocardia polyresistens	Mangrove: Water	uTitan(L):Qiagen	Nocardia polyresistens	558	697	1255
sp879	83.6799	-1.46649	0.401858	-3.64927	0.000262989	0.002743	Bacteria	Bacteria_none	Bacteroidota	Flavobacteriia	Flavobacteriales	Flavobacteriaceae	Muricauda	Muricauda lutaonensis	Mangrove: Water	uTitan(L):Qiagen	Muricauda lutaonensis	261	349	610
sp1787	38.753	-1.49075	0.510104	-2.92244	0.00347297	0.0207949	Bacteria	Bacteria_none	Proteobacteria	Gammaproteobacteria	Vibrionales	Vibrionaceae	Photobacterium	Photobacterium aphoticum	Mangrove: Water	uTitan(L):Qiagen	Photobacterium aphoticum	118	159	277
sp377	180.062	-1.5076	0.296669	-5.08176	3.74E-07	1.12E-05	Bacteria	Bacteria_none	Bacteroidota	Flavobacteriia	Flavobacteriales	Flavobacteriaceae	Eudoraea	Eudoraea chungangensis	Mangrove: Water	uTitan(L):Qiagen	Eudoraea chungangensis	545	739	1284
sp1814	31.8708	-1.57084	0.576991	-2.72247	0.00647954	0.0341307	Bacteria	Bacteria_none	Firmicutes	Clostridia	Eubacteriales	Lachnospiraceae	Niameybacter	Niameybacter massiliensis	Mangrove: Water	uTitan(L):Qiagen	Niameybacter massiliensis	94	134	228
sp56	144.603	-1.58828	0.366495	-4.3337	1.47E-05	0.000253971	Bacteria	Bacteria_none	Planctomycetota	Planctomycetia	Pirellulales	Pirellulaceae	Lignipirellula	Lignipirellula cremea	Mangrove: Water	uTitan(L):Qiagen	Lignipirellula cremea	425	606	1031
sp424	52.8063	-1.59255	0.480701	-3.31297	0.000923116	0.00746186	Bacteria	Bacteria_none	Planctomycetota	Planctomycetia	Pirellulales	Pirellulaceae	Rubripirellula	Rubripirellula amarantea	Mangrove: Water	uTitan(L):Qiagen	Rubripirellula amarantea	153	219	372
sp130	895.312	-1.62832	0.277346	-5.87109	4.33E-09	3.26E-07	Bacteria	Bacteria_none	Cyanobacteria	Cyanobacteria_Incertae_sedis	Nostocales	Hapalosiphonaceae	Mastigocoleus	Mastigocoleus testarum	Coral-W	uTitan(L):Qiagen	Mastigocoleus testarum	1437	1831	3268
sp1616	27.7634	-1.64839	0.599269	-2.75067	0.0059474	0.0318728	Bacteria	Bacteria_none	Bacteroidota	Flavobacteriia	Flavobacteriales	Flavobacteriaceae	Winogradskyella	Winogradskyella haliclonae	Mangrove: Water	uTitan(L):Qiagen	Winogradskyella haliclonae	78	116	194
sp1728	29.6549	-1.64895	0.603031	-2.73443	0.00624886	0.0332131	Bacteria	Bacteria_none	Actinobacteria	Actinomycetia	Streptomycetales	Streptomycetaceae	Kitasatospora	Kitasatospora azatica	Mangrove: Water	uTitan(L):Qiagen	Kitasatospora azatica	85	125	210
sp85	370.826	-1.65337	0.479879	-3.44539	0.000570243	0.00879885	Bacteria	Bacteria_none	Proteobacteria	Gammaproteobacteria	Vibrionales	Vibrionaceae	Vibrio	Vibrio aquimaris	Coral-W	uTitan(L):uTitan(F)	Vibrio aquimaris	247	1686	1933
sp49	2054.89	-1.6864	0.192849	-8.74466	2.24E-18	2.65E-16	Bacteria	Bacteria_none	Cyanobacteria	Cyanobacteria_Incertae_sedis	Oscillatoriales	Microcoleaceae	Planktothrix	Planktothrix tepida	Coral-W	uTitan(L):Qiagen	Planktothrix tepida	3228	4204	7432
sp634	83.0506	-1.72465	0.40612	-4.24667	2.17E-05	0.000347877	Bacteria	Bacteria_none	Bacteroidota	Flavobacteriia	Flavobacteriales	Flavobacteriaceae	Aureicoccus	Aureicoccus marinus	Mangrove: Water	uTitan(L):Qiagen	Aureicoccus marinus	224	351	575
sp1501	59.2648	-1.74314	0.616781	-2.82619	0.00471059	0.0458778	Bacteria	Bacteria_none	Cyanobacteria	Cyanobacteria_Incertae_sedis	Nostocales	Nostocaceae	Nostoc	Nostoc mirabile	Mangrove: Water	uTitan(L):uTitan(F)	Nostoc mirabile	176	245	421
sp95	215.573	-1.78605	0.582531	-3.06602	0.00216932	0.0239154	Bacteria	Bacteria_none	Proteobacteria	Gammaproteobacteria	Legionellales	Coxiellaceae	Coxiella	Coxiella burnetii	Coral-W	uTitan(L):uTitan(F)	Coxiella burnetii	132	1033	1165
sp508	209.723	-1.80286	0.603493	-2.98737	0.00281387	0.0284911	Bacteria	Bacteria_none	Proteobacteria	Gammaproteobacteria	Cellvibrionales	Cellvibrionaceae	Agarilytica	Agarilytica rhodophyticola	Coral-W	uTitan(L):uTitan(F)	Agarilytica rhodophyticola	127	968	1095
sp463	463.27	-1.80707	0.503221	-3.591	0.000329411	0.0055248	Bacteria	Bacteria_none	Proteobacteria	Alphaproteobacteria	Rhodospirillales	Thalassospiraceae	Thalassospira	Thalassospira xiamenensis	Coral-W	uTitan(L):uTitan(F)	Thalassospira xiamenensis	264	2091	2355
sp144	369.759	-1.83254	0.509574	-3.59622	0.000322872	0.00547464	Bacteria	Bacteria_none	Proteobacteria	Gammaproteobacteria	Cellvibrionales	Cellvibrionaceae	Agaribacterium	Agaribacterium haliotis	Coral-W	uTitan(L):uTitan(F)	Agaribacterium haliotis	222	1669	1891
sp213	67.5045	-1.87264	0.410307	-4.56399	5.02E-06	0.000108186	Bacteria	Bacteria_none	Planctomycetota	Planctomycetia	Pirellulales	Lacipirellulaceae	Pseudobythopirellula	Pseudobythopirellula maris	Mangrove: Water	uTitan(L):Qiagen	Pseudobythopirellula maris	170	296	466
sp414	548.023	-1.89842	0.374071	-5.07503	3.87E-07	1.66E-05	Bacteria	Bacteria_none	Lentisphaerae	Lentisphaeria	Lentisphaerales	Lentisphaeraceae	Lentisphaera	Lentisphaera araneosa	Coral-W	uTitan(L):uTitan(F)	Lentisphaera araneosa	314	2655	2969
sp12	6946.86	-1.928	0.548665	-3.51397	0.000441455	0.00852915	Bacteria	Bacteria_none	Cyanobacteria	Cyanobacteria_Incertae_sedis	Synechococcales	Prochlorococcaceae	Prochlorococcus	Prochlorococcus marinus	Mangrove: Water	uTitan(L):uTitan(F)	Prochlorococcus marinus	18653	29132	47785
sp246	100.46	-1.94433	0.434878	-4.47099	7.79E-06	0.000158633	Bacteria	Bacteria_none	Bacteroidota	Flavobacteriia	Flavobacteriales	Flavobacteriaceae	Robiginitalea	Robiginitalea biformata	Mangrove: Water	uTitan(L):Qiagen	Robiginitalea biformata	243	436	679
sp61	586.943	-1.95441	0.370219	-5.27907	1.30E-07	6.68E-06	Bacteria	Bacteria_none	Planctomycetota	Planctomycetia	Planctomycetales	Planctomycetaceae	Fuerstiella	Fuerstiella marisgermanici	Coral-W	uTitan(L):uTitan(F)	Fuerstiella marisgermanici	328	2902	3230
sp189	186.816	-1.95719	0.620148	-3.15601	0.00159943	0.0192806	Bacteria	Bacteria_none	Lentisphaerae	Oligosphaeria	Oligosphaerales	Oligosphaeraceae	Oligosphaera	Oligosphaera ethanolica	Coral-W	uTitan(L):uTitan(F)	Oligosphaera ethanolica	103	916	1019
sp150	221.772	-1.96492	0.573603	-3.42557	0.000613509	0.00937271	Bacteria	Bacteria_none	Proteobacteria	Oligoflexia	Oligoflexales	Pseudobacteriovoracaceae	Pseudobacteriovorax	Pseudobacteriovorax antillogorgiicola	Coral-W	uTitan(L):uTitan(F)	Pseudobacteriovorax antillogorgiicola	122	1072	1194
sp112	86.4041	-1.98305	0.4802	-4.12964	3.63E-05	0.000522118	Bacteria	Bacteria_none	Chloroflexi	Chloroflexia	Chloroflexales	Roseiflexaceae	Heliothrix	Heliothrix oregonensis	Mangrove: Water	uTitan(L):Qiagen	Heliothrix oregonensis	201	388	589
sp628	365.586	-2.01549	0.449992	-4.47895	7.50E-06	0.00021434	Bacteria	Bacteria_none	Proteobacteria	Gammaproteobacteria	Moraxellales	Moraxellaceae	Psychrobacter	Psychrobacter jeotgali	Coral-W	uTitan(L):uTitan(F)	Psychrobacter jeotgali	195	1809	2004
sp819	48.0481	-2.03486	0.674046	-3.01888	0.00253711	0.0295155	Bacteria	Bacteria_none	Proteobacteria	Gammaproteobacteria	Chromatiales	Ectothiorhodospiraceae	Inmirania	Inmirania thermothiophila	Mangrove: Water	uTitan(L):uTitan(F)	Inmirania thermothiophila	122	214	336
sp138	226.965	-2.03929	0.718436	-2.83852	0.00453236	0.0449593	Bacteria	Bacteria_none	Cyanobacteria	Cyanobacteria_Incertae_sedis	Chroococcales	Aphanothecaceae	Rippkaea	Rippkaea orientalis	Mangrove: Water	uTitan(L):uTitan(F)	Rippkaea orientalis	580	942	1522
sp1	98059.5	-2.05484	0.49181	-4.17812	2.94E-05	0.000907098	Bacteria	Bacteria_none	Cyanobacteria	Cyanobacteria_Incertae_sedis	Synechococcales	Prochlorococcaceae	Parasynechococcus	Parasynechococcus marenigrum	Mangrove: Water	uTitan(L):uTitan(F)	Parasynechococcus marenigrum	246793	422690	669483
sp350	42.6251	-2.07937	0.544192	-3.82102	0.0001329	0.00160141	Bacteria	Bacteria_none	Chloroflexi	Caldilineae	Caldilineales	Caldilineaceae	Litorilinea	Litorilinea aerophila	Mangrove: Water	uTitan(L):Qiagen	Litorilinea aerophila	96	189	285
sp97	665.375	-2.07941	0.34784	-5.97805	2.26E-09	1.74E-07	Bacteria	Bacteria_none	Lentisphaerae	Lentisphaeria	Lentisphaerales	Lentisphaeraceae	Lentisphaera	Lentisphaera profundi	Coral-W	uTitan(L):uTitan(F)	Lentisphaera profundi	342	3247	3589
sp755	140.327	-2.10473	0.388649	-5.41552	6.11E-08	2.42E-06	Bacteria	Bacteria_none	Bacteroidota	Flavobacteriia	Flavobacteriales	Flavobacteriaceae	Actibacter	Actibacter sediminis	Mangrove: Water	uTitan(L):Qiagen	Actibacter sediminis	305	627	932
sp158	1208.42	-2.13659	0.64045	-3.33608	0.000849693	0.0133902	Bacteria	Bacteria_none	Cyanobacteria	Cyanobacteria_Incertae_sedis	Pleurocapsales	Hyellaceae	Hyella	Hyella patelloides	Mangrove: Water	uTitan(L):uTitan(F)	Hyella patelloides	2904	5329	8233
sp95	679.707	-2.18242	0.610543	-3.57456	0.000350822	0.00715163	Bacteria	Bacteria_none	Proteobacteria	Gammaproteobacteria	Legionellales	Coxiellaceae	Coxiella	Coxiella burnetii	Mangrove: Water	uTitan(L):uTitan(F)	Coxiella burnetii	1600	3051	4651
sp1160	81.7659	-2.19215	0.3788	-5.7871	7.16E-09	3.47E-07	Bacteria	Bacteria_none	Firmicutes	Clostridia	Eubacteriales	Lachnospiraceae	Zhenhengia	Zhenhengia yiwuensis	Mangrove: Water	uTitan(L):Qiagen	Zhenhengia yiwuensis	172	373	545
sp428	54.4464	-2.22062	0.505222	-4.39534	1.11E-05	0.000211954	Bacteria	Bacteria_none	Planctomycetota	Planctomycetia	Pirellulales	Pirellulaceae	Rosistilla	Rosistilla oblonga	Mangrove: Water	uTitan(L):Qiagen	Rosistilla oblonga	113	253	366
sp32	167.116	-2.2299	0.693117	-3.21721	0.00129445	0.0169806	Bacteria	Bacteria_none	Planctomycetota	Planctomycetia	Pirellulales	Pirellulaceae	Aureliella	Aureliella helgolandensis	Coral-W	uTitan(L):uTitan(F)	Aureliella helgolandensis	80	802	882
sp1320	42.8514	-2.27683	0.590065	-3.8586	0.000114039	0.00140914	Bacteria	Bacteria_none	Bacteroidota	Flavobacteriia	Flavobacteriales	Flavobacteriaceae	Pelagihabitans	Pelagihabitans pacificus	Mangrove: Water	uTitan(L):Qiagen	Pelagihabitans pacificus	86	203	289
sp722	331.763	-2.27883	0.545814	-4.17511	2.98E-05	0.000718087	Bacteria	Bacteria_none	Proteobacteria	Alphaproteobacteria	Hyphomicrobiales	Beijerinckiaceae	Beijerinckia	Beijerinckia mobilis	Coral-W	uTitan(L):uTitan(F)	Beijerinckia mobilis	157	1795	1952
sp568	293.636	-2.29196	0.795812	-2.88003	0.00397632	0.031168	Bacteria	Bacteria_none	Actinobacteria	Acidimicrobiia	Acidimicrobiales	Ilumatobacteraceae	Ilumatobacter	Ilumatobacter nonamiensis	Mangrove: Sediment	uTitan(L):Qiagen	Ilumatobacter nonamiensis	622	1349	1971
sp147	61.2404	-2.29548	0.516652	-4.44299	8.87E-06	0.000173848	Bacteria	Bacteria_none	Planctomycetota	Planctomycetia	Pirellulales	Pirellulaceae	Roseiconus	Roseiconus nitratireducens	Mangrove: Water	uTitan(L):Qiagen	Roseiconus nitratireducens	121	279	400
sp123	223.024	-2.32312	0.586437	-3.96142	7.45E-05	0.00151267	Bacteria	Bacteria_none	Planctomycetota	Planctomycetia	Pirellulales	Lacipirellulaceae	Posidoniimonas	Posidoniimonas corsicana	Coral-W	uTitan(L):uTitan(F)	Posidoniimonas corsicana	102	1146	1248
sp36	2400.01	-2.38666	0.208045	-11.4718	1.83E-30	1.41E-27	Bacteria	Bacteria_none	Cyanobacteria	Cyanobacteria_Incertae_sedis	Chroococcales	Chroococcaceae	Pseudochroococcus	Pseudochroococcus couteii	Coral-W	uTitan(L):uTitan(F)	Pseudochroococcus couteii	1043	12231	13274
sp1480	20.5503	-2.46703	0.955099	-2.58301	0.0097943	0.0485958	Bacteria	Bacteria_none	Verrucomicrobia	Verrucomicrobiae	Verrucomicrobiales	Verrucomicrobiaceae	Roseibacillus	Roseibacillus ishigakijimensis	Mangrove: Water	uTitan(L):Qiagen	Roseibacillus ishigakijimensis	38	99	137
sp32	470.726	-2.47962	0.570605	-4.34559	1.39E-05	0.000460647	Bacteria	Bacteria_none	Planctomycetota	Planctomycetia	Pirellulales	Pirellulaceae	Aureliella	Aureliella helgolandensis	Mangrove: Water	uTitan(L):uTitan(F)	Aureliella helgolandensis	929	2207	3136
sp321	606.376	-2.48438	0.823102	-3.01831	0.0025419	0.0226132	Bacteria	Bacteria_none	Bacteroidota	Saprospiria	Saprospirales	Haliscomenobacteraceae	Phaeodactylibacter	Phaeodactylibacter luteus	Mangrove: Sediment	uTitan(L):Qiagen	Phaeodactylibacter luteus	1144	2804	3948
sp686	111.33	-2.55395	0.829504	-3.07888	0.00207779	0.0232321	Bacteria	Bacteria_none	Proteobacteria	Gammaproteobacteria	Alteromonadales	Alteromonadaceae	Paraneptunicella	Paraneptunicella aestuarii	Coral-W	uTitan(L):uTitan(F)	Paraneptunicella aestuarii	44	557	601
sp173	64.1977	-2.57595	0.783186	-3.28906	0.00100522	0.0148906	Bacteria	Bacteria_none	Planctomycetota	Planctomycetia	Planctomycetales	Planctomycetaceae	Rubinisphaera	Rubinisphaera italica	Mangrove: Water	uTitan(L):uTitan(F)	Rubinisphaera italica	119	320	439
sp506	172.155	-2.62656	0.660856	-3.97448	7.05E-05	0.0014511	Bacteria	Bacteria_none	Cyanobacteria	Cyanobacteria_Incertae_sedis	Synechococcales	Synechococcaceae	Synechococcus	Synechococcus moorigangaii	Coral-W	uTitan(L):uTitan(F)	Synechococcus moorigangaii	65	931	996
sp123	350.753	-2.64546	0.241195	-10.9681	5.44E-28	2.64E-25	Bacteria	Bacteria_none	Planctomycetota	Planctomycetia	Pirellulales	Lacipirellulaceae	Posidoniimonas	Posidoniimonas corsicana	Mangrove: Water	uTitan(L):Qiagen	Posidoniimonas corsicana	564	1694	2258
sp1080	236.833	-2.646	0.907253	-2.9165	0.00353985	0.033716	Bacteria	Bacteria_none	Cyanobacteria	Cyanobacteria_Incertae_sedis	Oscillatoriales	Microcoleaceae	Planktothricoides	Candidatus Planktothricoides rosea	Coral-W	uTitan(L):uTitan(F)	Candidatus Planktothricoides rosea	86	1048	1134
sp350	409.52	-2.67682	0.705682	-3.79323	0.000148698	0.00279053	Bacteria	Bacteria_none	Chloroflexi	Caldilineae	Caldilineales	Caldilineaceae	Litorilinea	Litorilinea aerophila	Mangrove: Sediment	uTitan(L):Qiagen	Litorilinea aerophila	658	1982	2640
sp1445	82.6141	-2.73526	0.892978	-3.06307	0.00219075	0.0206316	Bacteria	Bacteria_none	Bacteroidota	Saprospiria	Saprospirales	Lewinellaceae	Neolewinella	Neolewinella persica	Mangrove: Sediment	uTitan(L):Qiagen	Neolewinella persica	133	393	526
sp1139	223.793	-2.73916	0.820392	-3.33884	0.000841282	0.0122348	Bacteria	Bacteria_none	Bacteroidota	Flavobacteriia	Flavobacteriales	Flavobacteriaceae	Aequorivita	Aequorivita vladivostokensis	Coral-W	uTitan(L):uTitan(F)	Aequorivita vladivostokensis	74	1035	1109
sp1641	134.544	-2.77552	0.896419	-3.09623	0.00195998	0.0222371	Bacteria	Bacteria_none	Proteobacteria	Gammaproteobacteria	Pseudomonadales	Pseudomonadaceae	Halopseudomonas	Halopseudomonas pachastrellae	Coral-W	uTitan(L):uTitan(F)	Halopseudomonas pachastrellae	45	632	677
sp625	460.487	-2.81966	0.529997	-5.32014	1.04E-07	5.52E-06	Bacteria	Bacteria_none	Proteobacteria	Gammaproteobacteria	Alteromonadales	Alteromonadaceae	Alteromonas	Alteromonas abrolhosensis	Coral-W	uTitan(L):uTitan(F)	Alteromonas abrolhosensis	160	2302	2462
sp370	49.3679	-2.83799	0.879319	-3.22749	0.00124881	0.00950075	Bacteria	Bacteria_none	Planctomycetota	Planctomycetia	Pirellulales	Pirellulaceae	Bremerella	Bremerella alba	Mangrove: Water	uTitan(L):Qiagen	Bremerella alba	71	237	308
sp121	242.799	-2.92733	0.902336	-3.24417	0.00117792	0.0131202	Bacteria	Bacteria_none	Cyanobacteria	Cyanobacteria_Incertae_sedis	Nostocales	Hapalosiphonaceae	Fischerella	Fischerella indica	Mangrove: Sediment	uTitan(L):Qiagen	Fischerella indica	353	1179	1532
sp198	358.65	-2.94766	0.708008	-4.16331	3.14E-05	0.000802171	Bacteria	Bacteria_none	Cyanobacteria	Cyanobacteria_Incertae_sedis	Pseudanabaenales	Leptolyngbyaceae	Salileptolyngbya	Salileptolyngbya diazotrophicum	Mangrove: Sediment	uTitan(L):Qiagen	Salileptolyngbya diazotrophicum	494	1792	2286
sp87	2217.47	-2.99569	1.02862	-2.91235	0.00358719	0.0286419	Bacteria	Bacteria_none	Cyanobacteria	Cyanobacteria_Incertae_sedis	Synechococcales	Synechococcaceae	Dactylococcopsis	Dactylococcopsis salina	Mangrove: Sediment	uTitan(L):Qiagen	Dactylococcopsis salina	3247	10898	14145
sp383	61.194	-3.02271	0.682936	-4.42605	9.60E-06	0.000333204	Bacteria	Bacteria_none	Proteobacteria	Gammaproteobacteria	Cellvibrionales	Microbulbiferaceae	Microbulbifer	Microbulbifer celer	Mangrove: Water	uTitan(L):uTitan(F)	Microbulbifer celer	86	293	379
sp786	341.319	-3.07054	0.650955	-4.71698	2.39E-06	7.69E-05	Bacteria	Bacteria_none	Proteobacteria	Gammaproteobacteria	Moraxellales	Moraxellaceae	Acinetobacter	Acinetobacter guillouiae	Coral-W	uTitan(L):uTitan(F)	Acinetobacter guillouiae	105	1784	1889
sp126	152.607	-3.08784	0.705697	-4.37558	1.21E-05	0.000414001	Bacteria	Bacteria_none	Planctomycetota	Planctomycetia	Planctomycetales	Planctomycetaceae	Alienimonas	Alienimonas californiensis	Mangrove: Water	uTitan(L):uTitan(F)	Alienimonas californiensis	211	688	899
sp213	126.247	-3.10562	0.579737	-5.35694	8.46E-08	4.70E-06	Bacteria	Bacteria_none	Planctomycetota	Planctomycetia	Pirellulales	Lacipirellulaceae	Pseudobythopirellula	Pseudobythopirellula maris	Mangrove: Water	uTitan(L):uTitan(F)	Pseudobythopirellula maris	170	597	767
sp325	668.353	-3.11673	0.807923	-3.85771	0.000114455	0.00224628	Bacteria	Bacteria_none	Cyanobacteria	Cyanobacteria_Incertae_sedis	Chroococcales	Aphanothecaceae	Euhalothece	Euhalothece natronophila	Mangrove: Sediment	uTitan(L):Qiagen	Euhalothece natronophila	843	3348	4191
sp1380	82.2474	-3.12839	0.823271	-3.79995	0.000144727	0.00273597	Bacteria	Bacteria_none	Proteobacteria	Alphaproteobacteria	Hyphomicrobiales	Hyphomicrobiaceae	Filomicrobium	Filomicrobium fusiforme	Mangrove: Sediment	uTitan(L):Qiagen	Filomicrobium fusiforme	100	412	512
sp548	287.203	-3.14531	0.970633	-3.24047	0.00119332	0.0131675	Bacteria	Bacteria_none	Bacteroidota	Saprospiria	Saprospirales	Lewinellaceae	Lewinella	Lewinella cohaerens	Mangrove: Sediment	uTitan(L):Qiagen	Lewinella cohaerens	378	1452	1830
sp190	109.368	-3.25261	0.984933	-3.30237	0.000958723	0.0143938	Bacteria	Bacteria_none	Planctomycetota	Planctomycetia	Pirellulales	Lacipirellulaceae	Aeoliella	Aeoliella mucimassa	Mangrove: Water	uTitan(L):uTitan(F)	Aeoliella mucimassa	136	681	817
sp125	106.308	-3.25432	0.7301	-4.45736	8.30E-06	0.000297372	Bacteria	Bacteria_none	Planctomycetota	Planctomycetia	Pirellulales	Lacipirellulaceae	Botrimarina	Botrimarina hoheduenensis	Mangrove: Water	uTitan(L):uTitan(F)	Botrimarina hoheduenensis	128	573	701
sp740	72.3383	-3.27299	0.712128	-4.59608	4.31E-06	0.000167828	Bacteria	Bacteria_none	Planctomycetota	Planctomycetia	Pirellulales	Pirellulaceae	Rhodopirellula	Rhodopirellula solitaria	Mangrove: Water	uTitan(L):uTitan(F)	Rhodopirellula solitaria	88	374	462
sp352	326.843	-3.30893	0.911007	-3.63216	0.000281055	0.00443308	Bacteria	Bacteria_none	Proteobacteria	Gammaproteobacteria	Gammaproteobacteria_Incertae_sedis	Gammaproteobacteria_Incertae_sedis_Incertae_sedis	Thiolapillus	Thiolapillus brandeum	Mangrove: Sediment	uTitan(L):Qiagen	Thiolapillus brandeum	354	1608	1962
sp930	105.195	-3.3241	0.862326	-3.85481	0.000115821	0.00226217	Bacteria	Bacteria_none	Firmicutes	Bacilli	Lactobacillales	Lactobacillaceae	Acetilactobacillus	Acetilactobacillus jinshanensis	Coral-W	uTitan(L):uTitan(F)	Acetilactobacillus jinshanensis	25	582	607
sp85	1045.14	-3.41444	1.02241	-3.33961	0.000838948	0.0286612	Bacteria	Bacteria_none	Proteobacteria	Gammaproteobacteria	Vibrionales	Vibrionaceae	Vibrio	Vibrio aquimaris	Mangrove: Sediment	uTitan(L):uTitan(F)	Vibrio aquimaris	800	11460	12260
sp188	53.8633	-3.46139	1.07158	-3.23019	0.00123708	0.00948589	Bacteria	Bacteria_none	Planctomycetota	Planctomycetia	Pirellulales	Pirellulaceae	Stieleria	Stieleria maiorica	Mangrove: Water	uTitan(L):Qiagen	Stieleria maiorica	55	279	334
sp407	172.023	-3.52147	0.749342	-4.69941	2.61E-06	0.000111488	Bacteria	Bacteria_none	Cyanobacteria	Cyanobacteria_Incertae_sedis	Pseudanabaenales	Prochlorotrichaceae	Halomicronema	Halomicronema hongdechloris	Mangrove: Water	uTitan(L):uTitan(F)	Halomicronema hongdechloris	178	910	1088
sp428	109.985	-3.53322	0.73734	-4.79185	1.65E-06	7.49E-05	Bacteria	Bacteria_none	Planctomycetota	Planctomycetia	Pirellulales	Pirellulaceae	Rosistilla	Rosistilla oblonga	Mangrove: Water	uTitan(L):uTitan(F)	Rosistilla oblonga	113	485	598
sp56	418.157	-3.55814	0.614315	-5.79205	6.95E-09	4.41E-07	Bacteria	Bacteria_none	Planctomycetota	Planctomycetia	Pirellulales	Pirellulaceae	Lignipirellula	Lignipirellula cremea	Mangrove: Water	uTitan(L):uTitan(F)	Lignipirellula cremea	425	2126	2551
sp1567	54.6676	-3.64068	1.0291	-3.53774	0.000403569	0.00795608	Bacteria	Bacteria_none	Cyanobacteria	Cyanobacteria_Incertae_sedis	Synechococcales	Synechococcales_Incertae_sedis	Cymatolege	Cymatolege spiroidea	Coral-W	uTitan(L):Qiagen	Cymatolege spiroidea	27	134	161
sp1409	91.0714	-3.64536	1.31642	-2.76916	0.00562017	0.0403477	Bacteria	Bacteria_none	Firmicutes	Tissierellia	Tissierellales	Thermohalobacteraceae	Sporosalibacterium	Sporosalibacterium faouarense	Mangrove: Sediment	uTitan(L):Qiagen	Sporosalibacterium faouarense	72	468	540
sp123	204.944	-3.64929	0.556799	-6.55406	5.60E-11	5.15E-09	Bacteria	Bacteria_none	Planctomycetota	Planctomycetia	Pirellulales	Lacipirellulaceae	Posidoniimonas	Posidoniimonas corsicana	Coral-W	uTitan(L):Qiagen	Posidoniimonas corsicana	102	488	590
sp806	67.4396	-3.64943	0.929415	-3.92659	8.62E-05	0.00222931	Bacteria	Bacteria_none	Firmicutes	Clostridia	Eubacteriales	Peptostreptococcaceae	Romboutsia	Romboutsia hominis	Coral-W	uTitan(L):Qiagen	Romboutsia hominis	33	165	198
sp198	847.247	-3.70522	1.11524	-3.32235	0.00089262	0.0301868	Bacteria	Bacteria_none	Cyanobacteria	Cyanobacteria_Incertae_sedis	Pseudanabaenales	Leptolyngbyaceae	Salileptolyngbya	Salileptolyngbya diazotrophicum	Mangrove: Sediment	uTitan(L):uTitan(F)	Salileptolyngbya diazotrophicum	494	6478	6972
sp1208	70.6463	-3.80066	1.12736	-3.37131	0.000748128	0.00915923	Bacteria	Bacteria_none	Proteobacteria	Alphaproteobacteria	Hyphomicrobiales	Hyphomicrobiaceae	Methyloceanibacter	Methyloceanibacter caenitepidi	Mangrove: Sediment	uTitan(L):Qiagen	Methyloceanibacter caenitepidi	57	365	422
sp247	247.097	-3.81638	1.15296	-3.31008	0.000932687	0.0311663	Bacteria	Bacteria_none	Cyanobacteria	Cyanobacteria_Incertae_sedis	Chroococcales	Aphanothecaceae	Crocosphaera	Crocosphaera watsonii	Mangrove: Sediment	uTitan(L):uTitan(F)	Crocosphaera watsonii	136	1319	1455
sp518	182.849	-3.82559	1.36662	-2.7993	0.00512138	0.0488399	Bacteria	Bacteria_none	Firmicutes	Tissierellia	Tissierellales	Tissierellaceae	Tepidimicrobium	Tepidimicrobium ferriphilum	Mangrove: Water	uTitan(L):uTitan(F)	Tepidimicrobium ferriphilum	156	1066	1222
sp147	148.173	-3.88223	0.701748	-5.53223	3.16E-08	1.90E-06	Bacteria	Bacteria_none	Planctomycetota	Planctomycetia	Pirellulales	Pirellulaceae	Roseiconus	Roseiconus nitratireducens	Mangrove: Water	uTitan(L):uTitan(F)	Roseiconus nitratireducens	121	689	810
sp1168	19.3813	-3.88576	1.41931	-2.73778	0.00618552	0.0329668	Bacteria	Bacteria_none	Planctomycetota	Planctomycetia	Pirellulales	Pirellulaceae	Blastopirellula	Blastopirellula marina	Mangrove: Water	uTitan(L):Qiagen	Blastopirellula marina	15	99	114
sp621	433.464	-3.89671	0.463525	-8.40669	4.22E-17	8.13E-15	Bacteria	Bacteria_none	Proteobacteria	Gammaproteobacteria	Moraxellales	Moraxellaceae	Acinetobacter	Acinetobacter marinus	Coral-W	uTitan(L):uTitan(F)	Acinetobacter marinus	75	2464	2539
sp350	118.75	-3.91189	0.768971	-5.08718	3.63E-07	1.84E-05	Bacteria	Bacteria_none	Chloroflexi	Caldilineae	Caldilineales	Caldilineaceae	Litorilinea	Litorilinea aerophila	Mangrove: Water	uTitan(L):uTitan(F)	Litorilinea aerophila	96	632	728
sp65	2378.9	-3.91521	0.828505	-4.72563	2.29E-06	8.94E-05	Bacteria	Bacteria_none	Cyanobacteria	Cyanobacteria_Incertae_sedis	Pleurocapsales	Xenococcaceae	Foliisarcina	Foliisarcina bertiogensis	Mangrove: Sediment	uTitan(L):Qiagen	Foliisarcina bertiogensis	1775	12549	14324
sp1123	78.8296	-3.97389	1.45482	-2.73153	0.00630408	0.0444049	Bacteria	Bacteria_none	Cyanobacteria	Cyanobacteria_Incertae_sedis	Oscillatoriales	Oscillatoriales_Incertae_sedis	Ammassolinea	Ammassolinea attenuata	Mangrove: Sediment	uTitan(L):Qiagen	Ammassolinea attenuata	61	414	475
sp358	371.262	-4.00163	1.04709	-3.82166	0.000132555	0.00254328	Bacteria	Bacteria_none	Proteobacteria	Gammaproteobacteria	Chromatiales	Ectothiorhodospiraceae	Thioalkalivibrio	Thioalkalivibrio versutus	Mangrove: Sediment	uTitan(L):Qiagen	Thioalkalivibrio versutus	284	1930	2214
sp674	300.148	-4.05984	0.577167	-7.03408	2.01E-12	1.93E-10	Bacteria	Bacteria_none	Actinobacteria	Actinomycetia	Micrococcales	Micrococcaceae	Micrococcus	Micrococcus aloeverae	Coral-W	uTitan(L):uTitan(F)	Micrococcus aloeverae	46	1639	1685
sp2330	17.632	-4.0808	1.40192	-2.91087	0.00360428	0.0213832	Bacteria	Bacteria_none	Proteobacteria	Gammaproteobacteria	Methylococcales	Methylococcaceae	Methylococcus	Methylococcus thermophilus	Mangrove: Water	uTitan(L):Qiagen	Methylococcus thermophilus	12	92	104
sp2018	17.6909	-4.08779	1.43947	-2.83979	0.00451428	0.0256979	Bacteria	Bacteria_none	Bacteroidota	Flavobacteriia	Flavobacteriales	Flavobacteriaceae	Actibacter	Actibacter haliotis	Mangrove: Water	uTitan(L):Qiagen	Actibacter haliotis	12	91	103
sp129	96.0625	-4.1423	1.51765	-2.72943	0.00634443	0.044567	Bacteria	Bacteria_none	Cyanobacteria	Cyanobacteria_Incertae_sedis	Pleurocapsales	Pleurocapsales_Incertae_sedis	Odorella	Odorella benthonica	Mangrove: Sediment	uTitan(L):Qiagen	Odorella benthonica	64	506	570
sp158	188.552	-4.18625	1.17604	-3.55961	0.000371406	0.00548784	Bacteria	Bacteria_none	Cyanobacteria	Cyanobacteria_Incertae_sedis	Pleurocapsales	Hyellaceae	Hyella	Hyella patelloides	Mangrove: Sediment	uTitan(L):Qiagen	Hyella patelloides	122	986	1108
sp123	868.595	-4.2351	0.545699	-7.76088	8.43E-15	9.37E-12	Bacteria	Bacteria_none	Planctomycetota	Planctomycetia	Pirellulales	Lacipirellulaceae	Posidoniimonas	Posidoniimonas corsicana	Mangrove: Water	uTitan(L):uTitan(F)	Posidoniimonas corsicana	564	4379	4943
sp317	346.705	-4.24335	1.33113	-3.18778	0.00143367	0.0436358	Bacteria	Bacteria_none	Proteobacteria	Gammaproteobacteria	Vibrionales	Vibrionaceae	Enterovibrio	Enterovibrio pacificus	Mangrove: Sediment	uTitan(L):uTitan(F)	Enterovibrio pacificus	145	5104	5249
sp1256	154.614	-4.2757	1.43254	-2.98469	0.00283866	0.0244906	Bacteria	Bacteria_none	Cyanobacteria	Cyanobacteria_Incertae_sedis	Nostocales	Symphyonemataceae	Loriellopsis	Loriellopsis cavernicola	Mangrove: Sediment	uTitan(L):Qiagen	Loriellopsis cavernicola	78	781	859
sp88	1053.68	-4.27828	1.23696	-3.45871	0.000542773	0.0201912	Bacteria	Bacteria_none	Proteobacteria	Gammaproteobacteria	Vibrionales	Vibrionaceae	Enterovibrio	Enterovibrio nigricans	Mangrove: Sediment	uTitan(L):uTitan(F)	Enterovibrio nigricans	453	15051	15504
sp241	730.242	-4.38469	1.31413	-3.33659	0.000848144	0.0101896	Bacteria	Bacteria_none	Cyanobacteria	Cyanobacteria_Incertae_sedis	Oscillatoriales	Sirenicapillariaceae	Capilliphycus	Capilliphycus salinus	Mangrove: Sediment	uTitan(L):Qiagen	Capilliphycus salinus	423	3977	4400
sp2071	53.5224	-4.40184	1.38281	-3.18324	0.00145634	0.0155364	Bacteria	Bacteria_none	Bacteroidota	Bacteroidia	Bacteroidales	Bacteroidaceae	Bacteroides	Bacteroides thetaiotaomicron	Mangrove: Sediment	uTitan(L):Qiagen	Bacteroides thetaiotaomicron	27	284	311
sp888	67.5252	-4.40884	1.35736	-3.24809	0.00116182	0.0167634	Bacteria	Bacteria_none	Planctomycetota	Planctomycetia	Pirellulales	Thermoguttaceae	Thermogutta	Thermogutta terrifontis	Mangrove: Water	uTitan(L):uTitan(F)	Thermogutta terrifontis	38	321	359
sp1613	36.7608	-4.40971	1.50819	-2.92385	0.00345727	0.0432243	Bacteria	Bacteria_none	Firmicutes	Clostridia	Eubacteriales	Peptostreptococcaceae	Romboutsia	Romboutsia lituseburensis	Coral-W	uTitan(L):Qiagen	Romboutsia lituseburensis	12	90	102
sp291	852.501	-4.46194	1.66037	-2.68732	0.00720287	0.0487331	Bacteria	Bacteria_none	Cyanobacteria	Cyanobacteria_Incertae_sedis	Oscillatoriales	Oscillatoriaceae	Phormidium	Phormidium irriguum	Mangrove: Sediment	uTitan(L):Qiagen	Phormidium irriguum	474	4557	5031
sp275	795.007	-4.56614	1.10925	-4.11643	3.85E-05	0.000942176	Bacteria	Bacteria_none	Cyanobacteria	Cyanobacteria_Incertae_sedis	Oscillatoriales	Laspinemataceae	Perforafilum	Perforafilum tunnelli	Mangrove: Sediment	uTitan(L):Qiagen	Perforafilum tunnelli	406	4227	4633
sp1031	211.881	-4.65608	1.19352	-3.90112	9.57E-05	0.00191618	Bacteria	Bacteria_none	Cyanobacteria	Cyanobacteria_Incertae_sedis	Oscillatoriales	Microcoleaceae	Arthrospira	Arthrospira platensis	Mangrove: Sediment	uTitan(L):Qiagen	Arthrospira platensis	100	1175	1275
sp181	475.402	-4.69047	1.26849	-3.69769	0.00021757	0.00370446	Bacteria	Bacteria_none	Cyanobacteria	Cyanobacteria_Incertae_sedis	Pleurocapsales	Xenococcaceae	Xenococcus	Xenococcus spongiosum	Mangrove: Sediment	uTitan(L):Qiagen	Xenococcus spongiosum	220	2666	2886
sp194	126.483	-4.74394	1.41277	-3.3579	0.000785368	0.013023	Bacteria	Bacteria_none	Planctomycetota	Planctomycetia	Pirellulales	Lacipirellulaceae	Bythopirellula	Bythopirellula goksoeyrii	Mangrove: Water	uTitan(L):uTitan(F)	Bythopirellula goksoeyrii	60	721	781
sp934	142.044	-4.78922	1.2074	-3.96654	7.29E-05	0.00154947	Bacteria	Bacteria_none	Cyanobacteria	Cyanobacteria_Incertae_sedis	Oscillatoriales	Coleofasciculaceae	Coleofasciculus	Coleofasciculus chthonoplastes	Mangrove: Sediment	uTitan(L):Qiagen	Coleofasciculus chthonoplastes	59	732	791
sp1216	152.952	-4.79099	1.78617	-2.68227	0.00731234	0.0493439	Bacteria	Bacteria_none	Cyanobacteria	Cyanobacteria_Incertae_sedis	Chroococcales	Aphanothecaceae	Gloeothece	Gloeothece citriformis	Mangrove: Sediment	uTitan(L):Qiagen	Gloeothece citriformis	74	838	912
sp948	233.189	-4.83609	1.18056	-4.09644	4.20E-05	0.000998766	Bacteria	Bacteria_none	Bacteroidota	Saprospiria	Saprospirales	Lewinellaceae	Neolewinella	Neolewinella marina	Mangrove: Sediment	uTitan(L):Qiagen	Neolewinella marina	100	1256	1356
sp499	26.2631	-4.84765	1.73916	-2.78736	0.00531393	0.038708	Bacteria	Bacteria_none	Bacteroidota	Flavobacteriia	Flavobacteriales	Flavobacteriaceae	Muricauda	Muricauda hymeniacidonis	Mangrove: Sediment	uTitan(L):Qiagen	Muricauda hymeniacidonis	12	139	151
sp2246	55.4445	-4.88309	1.65362	-2.95297	0.00314732	0.0265304	Bacteria	Bacteria_none	Cyanobacteria	Cyanobacteria_Incertae_sedis	Chroococcales	Chroococcaceae	Limnococcus	Limnococcus fonticola	Mangrove: Sediment	uTitan(L):Qiagen	Limnococcus fonticola	25	305	330
sp138	1481.53	-4.92445	0.941748	-5.22906	1.70E-07	9.32E-06	Bacteria	Bacteria_none	Cyanobacteria	Cyanobacteria_Incertae_sedis	Chroococcales	Aphanothecaceae	Rippkaea	Rippkaea orientalis	Mangrove: Sediment	uTitan(L):Qiagen	Rippkaea orientalis	586	8344	8930
sp2218	69.4649	-4.9286	1.41539	-3.48215	0.000497412	0.00683875	Bacteria	Bacteria_none	Cyanobacteria	Cyanobacteria_Incertae_sedis	Oscillatoriales	Coleofasciculaceae	Pycnacronema	Pycnacronema arboriculum	Mangrove: Sediment	uTitan(L):Qiagen	Pycnacronema arboriculum	28	375	403
sp3056	34.6562	-4.95993	1.62371	-3.05469	0.00225297	0.0208209	Bacteria	Bacteria_none	Cyanobacteria	Cyanobacteria_Incertae_sedis	Pseudanabaenales	Leptolyngbyaceae	Phormidesmis	Phormidesmis communis	Mangrove: Sediment	uTitan(L):Qiagen	Phormidesmis communis	13	189	202
sp188	136.298	-5.00293	1.36484	-3.66558	0.000246783	0.00542113	Bacteria	Bacteria_none	Planctomycetota	Planctomycetia	Pirellulales	Pirellulaceae	Stieleria	Stieleria maiorica	Mangrove: Water	uTitan(L):uTitan(F)	Stieleria maiorica	55	680	735
sp108	968.691	-5.01952	1.23651	-4.05943	4.92E-05	0.00216703	Bacteria	Bacteria_none	Proteobacteria	Gammaproteobacteria	Vibrionales	Vibrionaceae	Thaumasiovibrio	Thaumasiovibrio subtropicus	Mangrove: Sediment	uTitan(L):uTitan(F)	Thaumasiovibrio subtropicus	242	13282	13524
sp1923	70.3448	-5.18163	1.78924	-2.896	0.00377955	0.0299914	Bacteria	Bacteria_none	Proteobacteria	Gammaproteobacteria	Xanthomonadales	Xanthomonadaceae	Arenimonas	Arenimonas soli	Mangrove: Sediment	uTitan(L):Qiagen	Arenimonas soli	26	378	404
sp966	71.8465	-5.31395	1.68219	-3.15894	0.00158342	0.047333	Bacteria	Bacteria_none	Proteobacteria	Gammaproteobacteria	Vibrionales	Vibrionaceae	Vibrio	Vibrio zhanjiangensis	Mangrove: Sediment	uTitan(L):uTitan(F)	Vibrio zhanjiangensis	16	695	711
sp1389	125.632	-5.56037	1.67577	-3.31809	0.000906344	0.010689	Bacteria	Bacteria_none	Cyanobacteria	Cyanobacteria_Incertae_sedis	Chroococcales	Aphanothecaceae	Gloeothece	Gloeothece tonkinensis	Mangrove: Sediment	uTitan(L):Qiagen	Gloeothece tonkinensis	36	690	726
sp1010	41.0517	-5.57951	1.58795	-3.51366	0.000441977	0.00852915	Bacteria	Bacteria_none	Proteobacteria	Gammaproteobacteria	Legionellales	Legionellaceae	Legionella	Legionella israelensis	Mangrove: Water	uTitan(L):uTitan(F)	Legionella israelensis	11	199	210
sp734	201.623	-5.58377	1.59354	-3.504	0.00045833	0.00651031	Bacteria	Bacteria_none	Cyanobacteria	Cyanobacteria_Incertae_sedis	Chroococcales	Geminocystaceae	Annamia	Annamia dubia	Mangrove: Sediment	uTitan(L):Qiagen	Annamia dubia	53	1084	1137
sp903	238.168	-5.60925	1.67162	-3.35557	0.000792026	0.00960518	Bacteria	Bacteria_none	Cyanobacteria	Cyanobacteria_Incertae_sedis	Oscillatoriales	Vermifilaceae	Vermifilum	Vermifilum ionodolium	Mangrove: Sediment	uTitan(L):Qiagen	Vermifilum ionodolium	59	1279	1338
sp1419	126.489	-5.69683	1.6468	-3.45933	0.000541517	0.00728922	Bacteria	Bacteria_none	Cyanobacteria	Cyanobacteria_Incertae_sedis	Chroococcales	Chroococcaceae	Limnococcus	Limnococcus limneticus	Mangrove: Sediment	uTitan(L):Qiagen	Limnococcus limneticus	33	699	732
sp1210	125.271	-5.92065	1.61013	-3.67713	0.000235868	0.00396351	Bacteria	Bacteria_none	Cyanobacteria	Cyanobacteria_Incertae_sedis	Chroococcales	Aphanothecaceae	Gloeothece	Gloeothece aurea	Mangrove: Sediment	uTitan(L):Qiagen	Gloeothece aurea	28	697	725
sp247	739.684	-6.0122	0.860064	-6.99042	2.74E-12	1.17E-09	Bacteria	Bacteria_none	Cyanobacteria	Cyanobacteria_Incertae_sedis	Chroococcales	Aphanothecaceae	Crocosphaera	Crocosphaera watsonii	Mangrove: Sediment	uTitan(L):Qiagen	Crocosphaera watsonii	136	4119	4255
sp106	70.3568	-6.09807	2.00696	-3.03846	0.0023779	0.0281047	Bacteria	Bacteria_none	Planctomycetota	Planctomycetia	Pirellulales	Pirellulaceae	Stieleria	Stieleria neptunia	Mangrove: Water	uTitan(L):uTitan(F)	Stieleria neptunia	12	360	372
sp576	101.394	-6.18663	1.52665	-4.05242	5.07E-05	0.00144401	Bacteria	Bacteria_none	Actinobacteria	Actinomycetia	Glycomycetales	Glycomycetaceae	Stackebrandtia	Stackebrandtia nassauensis	Mangrove: Water	uTitan(L):uTitan(F)	Stackebrandtia nassauensis	18	570	588
sp1331	116.44	-6.78875	2.04454	-3.32042	0.000898823	0.0106492	Bacteria	Bacteria_none	Actinobacteria	Actinomycetia	Jatrophihabitantales	Jatrophihabitantaceae	Jatrophihabitans	Jatrophihabitans soli	Mangrove: Sediment	uTitan(L):Qiagen	Jatrophihabitans soli	11	659	670
sp3293	7.59575	-6.88894	2.42019	-2.84644	0.00442106	0.03393	Bacteria	Bacteria_none	Actinobacteria	Thermoleophilia	Miltoncostaeales	Miltoncostaeaceae	Miltoncostaea	Miltoncostaea marina	Mangrove: Sediment	uTitan(L):Qiagen	Miltoncostaea marina	0	42	42
sp2831	7.72801	-6.94167	2.1329	-3.25457	0.00113563	0.00884785	Bacteria	Bacteria_none	Firmicutes	Clostridia	Eubacteriales	Clostridiaceae	Abyssisolibacter	Abyssisolibacter fermentans	Mangrove: Water	uTitan(L):Qiagen	Abyssisolibacter fermentans	0	43	43
sp1953	18.0298	-7.02825	2.54313	-2.76362	0.00571644	0.0487319	Bacteria	Bacteria_none	Proteobacteria	Gammaproteobacteria	Vibrionales	Vibrionaceae	Vibrio	Vibrio orientalis	Coral-W	uTitan(L):uTitan(F)	Vibrio orientalis	0	106	106
sp2367	18.0298	-7.02825	2.54313	-2.76362	0.00571644	0.0487319	Bacteria	Bacteria_none	Proteobacteria	Epsilonproteobacteria	Campylobacterales	Campylobacteraceae	Campylobacter	Campylobacter massiliensis	Coral-W	uTitan(L):uTitan(F)	Campylobacter massiliensis	0	106	106
sp581	18.2553	-7.04582	2.5444	-2.76915	0.00562032	0.0484478	Bacteria	Bacteria_none	Bacteroidota	Cytophagia	Cytophagales	Cyclobacteriaceae	Echinicola	Echinicola strongylocentroti	Coral-W	uTitan(L):uTitan(F)	Echinicola strongylocentroti	0	104	104
sp285	18.2644	-7.04777	2.52793	-2.78796	0.00530416	0.0459793	Bacteria	Bacteria_none	Planctomycetota	Phycisphaerae	Phycisphaerales	Phycisphaeraceae	Mucisphaera	Mucisphaera calidilacus	Coral-W	uTitan(L):uTitan(F)	Mucisphaera calidilacus	0	115	115
sp4182	8.5694	-7.06335	1.86384	-3.78967	0.000150846	0.00281034	Bacteria	Bacteria_none	Cyanobacteria	Cyanobacteria_Incertae_sedis	Chroococcales	Aphanothecaceae	Gloeothece	Gloeothece membranacea	Mangrove: Sediment	uTitan(L):Qiagen	Gloeothece membranacea	0	48	48
sp3626	8.73194	-7.09108	2.35497	-3.01111	0.00260292	0.0229969	Bacteria	Bacteria_none	Cyanobacteria	Cyanobacteria_Incertae_sedis	Pseudanabaenales	Prochlorotrichaceae	Nodosilinea	Nodosilinea bijugata	Mangrove: Sediment	uTitan(L):Qiagen	Nodosilinea bijugata	0	50	50
sp931	18.8767	-7.09481	2.49973	-2.83823	0.00453645	0.0404609	Bacteria	Bacteria_none	Verrucomicrobia	Opitutae	Puniceicoccales	Puniceicoccaceae	Pelagicoccus	Pelagicoccus albus	Coral-W	uTitan(L):uTitan(F)	Pelagicoccus albus	0	114	114
sp2817	19.0138	-7.10527	2.4936	-2.8494	0.00438011	0.0395235	Bacteria	Bacteria_none	Proteobacteria	Alphaproteobacteria	Hyphomicrobiales	Phyllobacteriaceae	Mesorhizobium	Mesorhizobium xinjiangense	Coral-W	uTitan(L):uTitan(F)	Mesorhizobium xinjiangense	0	115	115
sp1882	19.0763	-7.10996	2.49126	-2.85396	0.00431779	0.0394098	Bacteria	Bacteria_none	Proteobacteria	Gammaproteobacteria	Cellvibrionales	Cellvibrionaceae	Exilibacterium	Exilibacterium tricleocarpae	Coral-W	uTitan(L):uTitan(F)	Exilibacterium tricleocarpae	0	115	115
sp792	19.2165	-7.11951	2.52179	-2.8232	0.00475473	0.0420984	Bacteria	Bacteria_none	Proteobacteria	Gammaproteobacteria	Cellvibrionales	Cellvibrionaceae	Marinimicrobium	Marinimicrobium alkaliphilum	Coral-W	uTitan(L):uTitan(F)	Marinimicrobium alkaliphilum	0	106	106
sp3544	8.7888	-7.12884	2.52115	-2.82761	0.00468968	0.026371	Bacteria	Bacteria_none	Proteobacteria	Epsilonproteobacteria	Campylobacterales	Arcobacteraceae	Aliarcobacter	Aliarcobacter skirrowii	Mangrove: Water	uTitan(L):Qiagen	Aliarcobacter skirrowii	0	52	52
sp3036	19.448	-7.13862	2.48051	-2.87788	0.00400355	0.0369909	Bacteria	Bacteria_none	Bacteroidota	Bacteroidia	Marinilabiliales	Prolixibacteraceae	Draconibacterium	Draconibacterium sediminis	Coral-W	uTitan(L):uTitan(F)	Draconibacterium sediminis	0	125	125
sp1113	19.4891	-7.14038	2.48323	-2.87544	0.00403462	0.037056	Bacteria	Bacteria_none	Proteobacteria	Alphaproteobacteria	Magnetococcales	Magnetococcaceae	Magnetococcus	Magnetococcus marinus	Coral-W	uTitan(L):uTitan(F)	Magnetococcus marinus	0	113	113
sp1550	19.6765	-7.15407	2.47927	-2.88555	0.00390729	0.036319	Bacteria	Bacteria_none	Proteobacteria	Gammaproteobacteria	Cellvibrionales	Spongiibacteraceae	Dasania	Dasania marina	Coral-W	uTitan(L):uTitan(F)	Dasania marina	0	113	113
sp2067	19.6765	-7.15407	2.47927	-2.88555	0.00390729	0.036319	Bacteria	Bacteria_none	Cyanobacteria	Cyanobacteria_Incertae_sedis	Chroococcales	Microcystaceae	Microcystis	Microcystis aeruginosa	Coral-W	uTitan(L):uTitan(F)	Microcystis aeruginosa	0	113	113
sp1960	19.7131	-7.15703	2.46914	-2.89859	0.00374845	0.0352674	Bacteria	Bacteria_none	Proteobacteria	Alphaproteobacteria	Sphingomonadales	Sphingomonadaceae	Parasphingopyxis	Parasphingopyxis algicola	Coral-W	uTitan(L):uTitan(F)	Parasphingopyxis algicola	0	116	116
sp4497	9.14665	-7.15773	2.34428	-3.05327	0.00226364	0.0208209	Bacteria	Bacteria_none	Firmicutes	Bacilli	Bacillales	Bacillaceae	Virgibacillus	Virgibacillus ihumii	Mangrove: Sediment	uTitan(L):Qiagen	Virgibacillus ihumii	0	52	52
sp3104	19.937	-7.1735	2.457	-2.91962	0.00350454	0.033587	Bacteria	Bacteria_none	Proteobacteria	Gammaproteobacteria	Alteromonadales	Alteromonadaceae	Alteromonas	Alteromonas mediterranea	Coral-W	uTitan(L):uTitan(F)	Alteromonas mediterranea	0	119	119
sp132	20.1609	-7.18979	2.44617	-2.9392	0.00329062	0.0319335	Bacteria	Bacteria_none	Fibrobacteres	Chitinispirillia	Chitinispirillales	Chitinispirillaceae	Chitinispirillum	Chitinispirillum alkaliphilum	Coral-W	uTitan(L):uTitan(F)	Chitinispirillum alkaliphilum	0	122	122
sp1242	20.1609	-7.18979	2.44617	-2.9392	0.00329062	0.0319335	Bacteria	Bacteria_none	Proteobacteria	Gammaproteobacteria	Thiotrichales	Thiofilaceae	Thiofilum	Thiofilum flexile	Coral-W	uTitan(L):uTitan(F)	Thiofilum flexile	0	122	122
sp2591	20.2233	-7.19421	2.44406	-2.94355	0.00324469	0.0318889	Bacteria	Bacteria_none	Proteobacteria	Gammaproteobacteria	Vibrionales	Vibrionaceae	Paraphotobacterium	Paraphotobacterium marinum	Coral-W	uTitan(L):uTitan(F)	Paraphotobacterium marinum	0	122	122
sp3429	9.21366	-7.19594	2.0638	-3.48675	0.000488927	0.0046474	Bacteria	Bacteria_none	Bacteroidota	Bacteroidia	Bacteroidales	Odoribacteraceae	Odoribacter	Odoribacter laneus	Mangrove: Water	uTitan(L):Qiagen	Odoribacter laneus	0	52	52
sp1430	20.2889	-7.19787	2.47815	-2.90453	0.00367802	0.0348171	Bacteria	Bacteria_none	Planctomycetota	Planctomycetia	Pirellulales	Lacipirellulaceae	Botrimarina	Botrimarina mediterranea	Coral-W	uTitan(L):uTitan(F)	Botrimarina mediterranea	0	112	112
sp3525	8.48906	-7.22714	2.26248	-3.19435	0.00140147	0.0186471	Bacteria	Bacteria_none	Proteobacteria	Alphaproteobacteria	Hyphomicrobiales	Hyphomicrobiaceae	Methylothermalis	Methylothermalis aethiopiae	Mangrove: Water	uTitan(L):uTitan(F)	Methylothermalis aethiopiae	0	48	48
sp1659	9.43131	-7.22941	2.03533	-3.55195	0.000382384	0.00384365	Bacteria	Bacteria_none	Proteobacteria	Gammaproteobacteria	Nevskiales	Steroidobacteraceae	Steroidobacter	Steroidobacter agaridevorans	Mangrove: Water	uTitan(L):Qiagen	Steroidobacter agaridevorans	0	53	53
sp3399	20.8357	-7.23679	2.42982	-2.97832	0.0028983	0.0288521	Bacteria	Bacteria_none	Proteobacteria	Alphaproteobacteria	Hyphomicrobiales	Blastochloridaceae	Blastochloris	Blastochloris sulfoviridis	Coral-W	uTitan(L):uTitan(F)	Blastochloris sulfoviridis	0	121	121
sp1622	20.8601	-7.23866	2.42407	-2.98615	0.0028251	0.0284911	Bacteria	Bacteria_none	Proteobacteria	Alphaproteobacteria	Sphingomonadales	Erythrobacteraceae	Alteraurantiacibacter	Alteraurantiacibacter buctensis	Coral-W	uTitan(L):uTitan(F)	Alteraurantiacibacter buctensis	0	123	123
sp2845	9.71487	-7.24551	2.32416	-3.11748	0.00182404	0.018037	Bacteria	Bacteria_none	Actinobacteria	Rubrobacteria	Rubrobacterales	Rubrobacteraceae	Rubrobacter	Rubrobacter aplysinae	Mangrove: Sediment	uTitan(L):Qiagen	Rubrobacter aplysinae	0	57	57
sp1008	21.0109	-7.24868	2.43027	-2.98266	0.00285752	0.0286309	Bacteria	Bacteria_none	Planctomycetota	Planctomycetia	Isosphaerales	Isosphaeraceae	Aquisphaera	Aquisphaera giovannonii	Coral-W	uTitan(L):uTitan(F)	Aquisphaera giovannonii	0	120	120
sp741	9.76556	-7.25289	2.32146	-3.12429	0.00178237	0.0178307	Bacteria	Bacteria_none	Cyanobacteria	Cyanobacteria_Incertae_sedis	Oscillatoriales	Oscillatoriaceae	Lyngbya	Lyngbya aestuarii	Mangrove: Sediment	uTitan(L):Qiagen	Lyngbya aestuarii	0	57	57
sp3284	21.4253	-7.27611	2.48784	-2.92467	0.00344821	0.0332537	Bacteria	Bacteria_none	Proteobacteria	Alphaproteobacteria	Hyphomicrobiales	Ahrensiaceae	Ahrensia	Ahrensia marina	Coral-W	uTitan(L):uTitan(F)	Ahrensia marina	0	113	113
sp2051	13.4512	-7.27957	1.97625	-3.68353	0.000230029	0.00939193	Bacteria	Bacteria_none	Proteobacteria	Alphaproteobacteria	Sphingomonadales	Sphingomonadaceae	Sphingomonas	Sphingomonas paucimobilis	Mangrove: Sediment	uTitan(L):uTitan(F)	Sphingomonas paucimobilis	0	89	89
sp2955	13.2903	-7.28259	2.28952	-3.18083	0.00146854	0.0442945	Bacteria	Bacteria_none	Firmicutes	Clostridia	Eubacteriales	Peptococcaceae	Thermanaerosceptrum	Thermanaerosceptrum fracticalcis	Mangrove: Sediment	uTitan(L):uTitan(F)	Thermanaerosceptrum fracticalcis	0	145	145
sp1857	9.79915	-7.28318	2.02888	-3.58975	0.000330994	0.00341557	Bacteria	Bacteria_none	Planctomycetota	Planctomycetia	Pirellulales	Pirellulaceae	Rubripirellula	Rubripirellula reticaptiva	Mangrove: Water	uTitan(L):Qiagen	Rubripirellula reticaptiva	0	53	53
sp1924	21.6964	-7.29509	2.40199	-3.03711	0.00238862	0.0249029	Bacteria	Bacteria_none	Tenericutes	Mollicutes	Mycoplasmatales	Mycoplasmataceae	Mesomycoplasma	Mesomycoplasma mobile	Coral-W	uTitan(L):uTitan(F)	Mesomycoplasma mobile	0	125	125
sp1948	21.707	-7.29636	2.38921	-3.05389	0.00225899	0.0244364	Bacteria	Bacteria_none	Proteobacteria	Gammaproteobacteria	Thiotrichales	Piscirickettsiaceae	Hydrogenovibrio	Hydrogenovibrio thermophilus	Coral-W	uTitan(L):uTitan(F)	Hydrogenovibrio thermophilus	0	131	131
sp3424	21.736	-7.29712	2.44009	-2.99051	0.00278512	0.0284599	Bacteria	Bacteria_none	Bacteroidota	Flavobacteriia	Flavobacteriales	Flavobacteriaceae	Polaribacter	Polaribacter staleyi	Coral-W	uTitan(L):uTitan(F)	Polaribacter staleyi	0	118	118
sp2495	21.7558	-7.29995	2.38662	-3.0587	0.00222299	0.0243267	Bacteria	Bacteria_none	Proteobacteria	Gammaproteobacteria	Alteromonadales	Shewanellaceae	Parashewanella	Parashewanella tropica	Coral-W	uTitan(L):uTitan(F)	Parashewanella tropica	0	135	135
sp560	21.7848	-7.30065	2.41379	-3.02456	0.00248992	0.0256129	Bacteria	Bacteria_none	Cyanobacteria	Cyanobacteria_Incertae_sedis	Synechococcales	Synechococcales_Incertae_sedis	Metis	Metis fasciculata	Coral-W	uTitan(L):uTitan(F)	Metis fasciculata	0	122	122
sp407	21.7954	-7.30189	2.39161	-3.05313	0.00226468	0.0244364	Bacteria	Bacteria_none	Cyanobacteria	Cyanobacteria_Incertae_sedis	Pseudanabaenales	Prochlorotrichaceae	Halomicronema	Halomicronema hongdechloris	Coral-W	uTitan(L):uTitan(F)	Halomicronema hongdechloris	0	128	128
sp1089	21.7908	-7.30299	2.4003	-3.04254	0.00234594	0.0247931	Bacteria	Bacteria_none	Bacteroidota	Cytophagia	Cytophagales	Reichenbachiellaceae	Reichenbachiella	Reichenbachiella faecimaris	Coral-W	uTitan(L):uTitan(F)	Reichenbachiella faecimaris	0	143	143
sp2289	21.8594	-7.30563	2.40829	-3.03353	0.0024171	0.0250307	Bacteria	Bacteria_none	Proteobacteria	Deltaproteobacteria	Desulfobacterales	Desulfobacteraceae	Desulfoconvexum	Desulfoconvexum algidum	Coral-W	uTitan(L):uTitan(F)	Desulfoconvexum algidum	0	123	123
sp1243	21.9644	-7.31469	2.40653	-3.03952	0.00236953	0.024872	Bacteria	Bacteria_none	Proteobacteria	Epsilonproteobacteria	Campylobacterales	Arcobacteraceae	Arcobacter	Arcobacter nitrofigilis	Coral-W	uTitan(L):uTitan(F)	Arcobacter nitrofigilis	0	147	147
sp3977	10.1015	-7.32863	2.00768	-3.6503	0.000261939	0.002743	Bacteria	Bacteria_none	Firmicutes	Bacilli	Bacillales	Paenibacillaceae	Saccharibacillus	Saccharibacillus deserti	Mangrove: Water	uTitan(L):Qiagen	Saccharibacillus deserti	0	57	57
sp596	22.8054	-7.36724	2.35794	-3.12443	0.00178147	0.0206677	Bacteria	Bacteria_none	Planctomycetota	Planctomycetia	Pirellulales	Lacipirellulaceae	Bythopirellula	Bythopirellula polymerisocia	Coral-W	uTitan(L):uTitan(F)	Bythopirellula polymerisocia	0	134	134
sp4201	9.36463	-7.37085	2.20175	-3.34772	0.000814796	0.0131285	Bacteria	Bacteria_none	Cyanobacteria	Cyanobacteria_Incertae_sedis	Nostocales	Aphanizomenonaceae	Dolichospermum	Dolichospermum brachiatum	Mangrove: Water	uTitan(L):uTitan(F)	Dolichospermum brachiatum	0	57	57
sp891	9.38197	-7.37357	2.23079	-3.30536	0.000948557	0.0143938	Bacteria	Bacteria_none	Firmicutes	Clostridia	Eubacteriales	Eubacteriaceae	Eubacterium	Eubacterium limosum	Mangrove: Water	uTitan(L):uTitan(F)	Eubacterium limosum	0	57	57
sp740	23.2685	-7.39577	2.36235	-3.13069	0.00174398	0.0203861	Bacteria	Bacteria_none	Planctomycetota	Planctomycetia	Pirellulales	Pirellulaceae	Rhodopirellula	Rhodopirellula solitaria	Coral-W	uTitan(L):uTitan(F)	Rhodopirellula solitaria	0	131	131
sp835	23.2791	-7.39693	2.34257	-3.15761	0.00159071	0.0192806	Bacteria	Bacteria_none	Verrucomicrobia	Opitutae	Puniceicoccales	Puniceicoccaceae	Pelagicoccus	Pelagicoccus mobilis	Coral-W	uTitan(L):uTitan(F)	Pelagicoccus mobilis	0	137	137
sp2337	23.3537	-7.40159	2.33918	-3.16419	0.00155516	0.0190446	Bacteria	Bacteria_none	Proteobacteria	Gammaproteobacteria	Cellvibrionales	Cellvibrionaceae	Umboniibacter	Umboniibacter roseus	Coral-W	uTitan(L):uTitan(F)	Umboniibacter roseus	0	138	138
sp2130	23.6417	-7.41896	2.33981	-3.17075	0.00152048	0.0188526	Bacteria	Bacteria_none	Proteobacteria	Gammaproteobacteria	Alteromonadales	Alteromonadaceae	Saccharobesus	Saccharobesus litoralis	Coral-W	uTitan(L):uTitan(F)	Saccharobesus litoralis	0	136	136
sp2051	9.76087	-7.42047	2.24697	-3.30243	0.000958509	0.0143938	Bacteria	Bacteria_none	Proteobacteria	Alphaproteobacteria	Sphingomonadales	Sphingomonadaceae	Sphingomonas	Sphingomonas paucimobilis	Mangrove: Water	uTitan(L):uTitan(F)	Sphingomonas paucimobilis	0	50	50
sp3559	23.7788	-7.42732	2.33504	-3.1808	0.00146867	0.018575	Bacteria	Bacteria_none	Actinobacteria	Actinomycetia	Micrococcales	Intrasporangiaceae	Janibacter	Janibacter indicus	Coral-W	uTitan(L):uTitan(F)	Janibacter indicus	0	137	137
sp1755	23.8824	-7.43272	2.42429	-3.06594	0.0021699	0.0239154	Bacteria	Bacteria_none	Proteobacteria	Gammaproteobacteria	Thiotrichales	Fastidiosibacteraceae	Cysteiniphilum	Cysteiniphilum halobium	Coral-W	uTitan(L):uTitan(F)	Cysteiniphilum halobium	0	125	125
sp1363	24.0011	-7.44131	2.31537	-3.21387	0.00130959	0.0169806	Bacteria	Bacteria_none	Proteobacteria	Alphaproteobacteria	Magnetococcales	Magnetococcaceae	Magnetofaba	Magnetofaba australis	Coral-W	uTitan(L):uTitan(F)	Magnetofaba australis	0	145	145
sp1122	24.19	-7.45211	2.3211	-3.21059	0.00132462	0.0170324	Bacteria	Bacteria_none	Proteobacteria	Epsilonproteobacteria	Campylobacterales	Sulfurovaceae	Sulfurovum	Sulfurovum lithotrophicum	Coral-W	uTitan(L):uTitan(F)	Sulfurovum lithotrophicum	0	140	140
sp1268	24.1976	-7.45391	2.31655	-3.21768	0.00129232	0.0169806	Bacteria	Bacteria_none	Proteobacteria	Gammaproteobacteria	Alteromonadales	Alteromonadaceae	Alteromonas	Alteromonas genovensis	Coral-W	uTitan(L):uTitan(F)	Alteromonas genovensis	0	156	156
sp3369	24.2281	-7.4542	2.32727	-3.20298	0.00136015	0.0173448	Bacteria	Bacteria_none	Proteobacteria	Gammaproteobacteria	Alteromonadales	Shewanellaceae	Parashewanella	Parashewanella hymeniacidonis	Coral-W	uTitan(L):uTitan(F)	Parashewanella hymeniacidonis	0	138	138
sp3404	24.3256	-7.46061	2.30699	-3.23392	0.00122106	0.0165123	Bacteria	Bacteria_none	Proteobacteria	Gammaproteobacteria	Alteromonadales	Alteromonadaceae	Alteromonas	Alteromonas macleodii	Coral-W	uTitan(L):uTitan(F)	Alteromonas macleodii	0	146	146
sp3388	11.1157	-7.46563	1.9661	-3.79718	0.000146353	0.00171039	Bacteria	Bacteria_none	Firmicutes	Clostridia	Eubacteriales	Clostridiaceae	Anaeromonas	Anaeromonas frigoriresistens	Mangrove: Water	uTitan(L):Qiagen	Anaeromonas frigoriresistens	0	61	61
sp2862	24.5435	-7.47211	2.41316	-3.0964	0.00195884	0.0222371	Bacteria	Bacteria_none	Proteobacteria	Gammaproteobacteria	Legionellales	Legionellaceae	Legionella	Legionella tunisiensis	Coral-W	uTitan(L):uTitan(F)	Legionella tunisiensis	0	128	128
sp1669	24.7856	-7.48799	2.29186	-3.26722	0.00108611	0.0152352	Bacteria	Bacteria_none	Cyanobacteria	Cyanobacteria_Incertae_sedis	Nostocales	Nostocaceae	Mojavia	Mojavia pulchra	Coral-W	uTitan(L):uTitan(F)	Mojavia pulchra	0	153	153
sp3366	24.8009	-7.48812	2.30252	-3.25215	0.00114536	0.0157794	Bacteria	Bacteria_none	Proteobacteria	Gammaproteobacteria	Alteromonadales	Colwelliaceae	Thalassotalea	Thalassotalea coralli	Coral-W	uTitan(L):uTitan(F)	Thalassotalea coralli	0	144	144
sp147	25.0279	-7.50066	2.33241	-3.21584	0.00130061	0.0169806	Bacteria	Bacteria_none	Planctomycetota	Planctomycetia	Pirellulales	Pirellulaceae	Roseiconus	Roseiconus nitratireducens	Coral-W	uTitan(L):uTitan(F)	Roseiconus nitratireducens	0	137	137
sp1942	15.5476	-7.51106	2.22711	-3.37255	0.000744753	0.0257055	Bacteria	Bacteria_none	Proteobacteria	Alphaproteobacteria	Hyphomicrobiales	Parvibaculaceae	Kaustia	Kaustia mangrovi	Mangrove: Sediment	uTitan(L):uTitan(F)	Kaustia mangrovi	0	211	211
sp2626	10.5402	-7.52892	2.25563	-3.33784	0.000844328	0.0133902	Bacteria	Bacteria_none	Cyanobacteria	Cyanobacteria_Incertae_sedis	Spirulinales	Spirulinaceae	Halospirulina	Halospirulina tapeticola	Mangrove: Water	uTitan(L):uTitan(F)	Halospirulina tapeticola	0	46	46
sp1491	25.4787	-7.52905	2.32032	-3.24483	0.00117523	0.0160476	Bacteria	Bacteria_none	Bacteroidota	Bacteroidia	Bacteroidales	Prevotellaceae	Prevotella	Prevotella pallens	Coral-W	uTitan(L):uTitan(F)	Prevotella pallens	0	174	174
sp2517	10.5821	-7.53398	2.25061	-3.34753	0.000815364	0.0131285	Bacteria	Bacteria_none	Proteobacteria	Betaproteobacteria	Burkholderiales	Oxalobacteraceae	Duganella	Duganella margarita	Mangrove: Water	uTitan(L):uTitan(F)	Duganella margarita	0	47	47
sp3309	25.66	-7.53757	2.27141	-3.31845	0.00090519	0.0128138	Bacteria	Bacteria_none	Actinobacteria	Actinomycetia	Micrococcales	Micrococcaceae	Micrococcus	Micrococcus flavus	Coral-W	uTitan(L):uTitan(F)	Micrococcus flavus	0	153	153
sp1909	11.9183	-7.53903	2.27623	-3.31206	0.000926103	0.0108715	Bacteria	Bacteria_none	Cyanobacteria	Cyanobacteria_Incertae_sedis	Oscillatoriales	Sirenicapillariaceae	Neolyngbya	Neolyngbya irregularis	Mangrove: Sediment	uTitan(L):Qiagen	Neolyngbya irregularis	0	66	66
sp3644	10.6168	-7.55351	2.20463	-3.4262	0.000612085	0.0108804	Bacteria	Bacteria_none	Cyanobacteria	Cyanobacteria_Incertae_sedis	Nostocales	Scytonemataceae	Brasilonema	Brasilonema burkei	Mangrove: Water	uTitan(L):uTitan(F)	Brasilonema burkei	0	71	71
sp2485	26.9121	-7.60802	2.2859	-3.32823	0.000873985	0.0124867	Bacteria	Bacteria_none	Proteobacteria	Alphaproteobacteria	Hyphomicrobiales	Phyllobacteriaceae	Nitratireductor	Nitratireductor alexandrii	Coral-W	uTitan(L):uTitan(F)	Nitratireductor alexandrii	0	184	184
sp1652	27.0919	-7.61641	2.23224	-3.412	0.000644884	0.00975545	Bacteria	Bacteria_none	Proteobacteria	Gammaproteobacteria	Alteromonadales	Alteromonadaceae	Aestuariibacter	Aestuariibacter salexigens	Coral-W	uTitan(L):uTitan(F)	Aestuariibacter salexigens	0	168	168
sp3175	11.109	-7.61647	2.71162	-2.80883	0.00497221	0.0478279	Bacteria	Bacteria_none	Proteobacteria	Alphaproteobacteria	Rhodospirillales	Rhodospirillaceae	Rhodospirillum	Rhodospirillum rubrum	Mangrove: Water	uTitan(L):uTitan(F)	Rhodospirillum rubrum	0	77	77
sp1899	27.1605	-7.6186	2.28342	-3.33649	0.000848427	0.0122348	Bacteria	Bacteria_none	Cyanobacteria	Cyanobacteria_Incertae_sedis	Pseudanabaenales	Oculatellaceae	Oculatella	Oculatella mojaviensis	Coral-W	uTitan(L):uTitan(F)	Oculatella mojaviensis	0	148	148
sp1532	12.7303	-7.63426	2.23623	-3.41389	0.000640415	0.00827391	Bacteria	Bacteria_none	Cyanobacteria	Cyanobacteria_Incertae_sedis	Nostocales	Nostocaceae	Komarekiella	Komarekiella gloeocapsoidea	Mangrove: Sediment	uTitan(L):Qiagen	Komarekiella gloeocapsoidea	0	71	71
sp3718	12.8524	-7.64873	2.76997	-2.7613	0.00575713	0.0410016	Bacteria	Bacteria_none	Bacteroidota	Bacteroidia	Marinilabiliales	Marinilabiliaceae	Carboxylicivirga	Carboxylicivirga marina	Mangrove: Sediment	uTitan(L):Qiagen	Carboxylicivirga marina	0	76	76
sp1127	12.9998	-7.66469	1.72684	-4.43857	9.06E-06	0.000283939	Bacteria	Bacteria_none	Cyanobacteria	Cyanobacteria_Incertae_sedis	Oscillatoriales	Cyanothecaceae	Cyanothece	Cyanothece svehlovae	Mangrove: Sediment	uTitan(L):Qiagen	Cyanothece svehlovae	0	73	73
sp224	28.4491	-7.68734	2.20643	-3.48407	0.000493858	0.00778238	Bacteria	Bacteria_none	Proteobacteria	Deltaproteobacteria	Myxococcales	Nannocystaceae	Plesiocystis	Plesiocystis pacifica	Coral-W	uTitan(L):uTitan(F)	Plesiocystis pacifica	0	182	182
sp2120	28.6289	-7.6952	2.20883	-3.48384	0.000494279	0.00778238	Bacteria	Bacteria_none	Proteobacteria	Gammaproteobacteria	Alteromonadales	Pseudoalteromonadaceae	Pseudoalteromonas	Pseudoalteromonas rubra	Coral-W	uTitan(L):uTitan(F)	Pseudoalteromonas rubra	0	166	166
sp1143	28.865	-7.70723	2.19814	-3.50626	0.000454459	0.0074599	Bacteria	Bacteria_none	Cyanobacteria	Cyanobacteria_Incertae_sedis	Pseudanabaenales	Leptolyngbyaceae	Leptothoe	Leptothoe kymatousa	Coral-W	uTitan(L):uTitan(F)	Leptothoe kymatousa	0	170	170
sp196	12.2043	-7.74004	2.76121	-2.80314	0.00506083	0.0484706	Bacteria	Bacteria_none	Actinobacteria	Actinomycetia	Corynebacteriales	Mycobacteriaceae	Mycobacterium	Mycobacterium tuberculosis	Mangrove: Water	uTitan(L):uTitan(F)	Mycobacterium tuberculosis	0	47	47
sp1266	29.9908	-7.7617	2.21304	-3.50726	0.000452755	0.0074599	Bacteria	Bacteria_none	Proteobacteria	Gammaproteobacteria	Vibrionales	Vibrionaceae	Vibrio	Vibrio neptunius	Coral-W	uTitan(L):uTitan(F)	Vibrio neptunius	0	165	165
sp4180	12.5327	-7.78281	2.73404	-2.84664	0.00441839	0.0446118	Bacteria	Bacteria_none	Proteobacteria	Alphaproteobacteria	Hyphomicrobiales	Rhizobiaceae	Shinella	Shinella daejeonensis	Mangrove: Water	uTitan(L):uTitan(F)	Shinella daejeonensis	0	61	61
sp2483	12.8543	-7.8153	2.18903	-3.57022	0.000356686	0.00718637	Bacteria	Bacteria_none	Proteobacteria	Betaproteobacteria	Burkholderiales	Oxalobacteraceae	Massilia	Massilia yuzhufengensis	Mangrove: Water	uTitan(L):uTitan(F)	Massilia yuzhufengensis	0	59	59
sp2616	31.6526	-7.84137	2.14445	-3.65659	0.000255588	0.00443116	Bacteria	Bacteria_none	Firmicutes	Clostridia	Eubacteriales	Lachnospiraceae	Lacrimispora	Lacrimispora sphenoides	Coral-W	uTitan(L):uTitan(F)	Lacrimispora sphenoides	0	204	204
sp2105	31.8203	-7.84783	2.14022	-3.66683	0.00024558	0.00430601	Bacteria	Bacteria_none	Proteobacteria	Alphaproteobacteria	Sphingomonadales	Erythrobacteraceae	Qipengyuania	Qipengyuania aurantiaca	Coral-W	uTitan(L):uTitan(F)	Qipengyuania aurantiaca	0	187	187
sp3720	12.9816	-7.85424	2.64484	-2.96964	0.00298147	0.0394619	Bacteria	Bacteria_none	Proteobacteria	Gammaproteobacteria	Vibrionales	Vibrionaceae	Photobacterium	Photobacterium carnosum	Coral-W	uTitan(L):Qiagen	Photobacterium carnosum	0	34	34
sp1308	13.2097	-7.86322	2.15351	-3.65135	0.000260864	0.00557346	Bacteria	Bacteria_none	Proteobacteria	Deltaproteobacteria	Desulfarculales	Desulfarculaceae	Desulfocarbo	Desulfocarbo indianensis	Mangrove: Water	uTitan(L):uTitan(F)	Desulfocarbo indianensis	0	72	72
sp2600	13.4881	-7.88737	2.15447	-3.66094	0.000251295	0.00542113	Bacteria	Bacteria_none	Proteobacteria	Alphaproteobacteria	Rhodobacterales	Roseobacteraceae	Actibacterium	Actibacterium mucosum	Mangrove: Water	uTitan(L):uTitan(F)	Actibacterium mucosum	0	68	68
sp3408	20.8143	-7.90965	2.32247	-3.40571	0.000659921	0.0237572	Bacteria	Bacteria_none	Firmicutes	Clostridia	Eubacteriales	Syntrophomonadaceae	Thermohydrogenium	Thermohydrogenium kirishiense	Mangrove: Sediment	uTitan(L):uTitan(F)	Thermohydrogenium kirishiense	0	96	96
sp1237	33.4076	-7.91738	2.15026	-3.68206	0.000231355	0.00415094	Bacteria	Bacteria_none	Cyanobacteria	Cyanobacteria_Incertae_sedis	Chroococcales	Aphanothecaceae	Rubidibacter	Rubidibacter lacunae	Coral-W	uTitan(L):uTitan(F)	Rubidibacter lacunae	0	184	184
sp2594	33.8142	-7.93571	2.10126	-3.77664	0.000158961	0.00295515	Bacteria	Bacteria_none	Firmicutes	Clostridia	Eubacteriales	Eubacteriales_Incertae_sedis	Intestinimonas	Intestinimonas gabonensis	Coral-W	uTitan(L):uTitan(F)	Intestinimonas gabonensis	0	202	202
sp2706	15.4325	-7.93858	1.8465	-4.29926	1.71E-05	0.000281748	Bacteria	Bacteria_none	Firmicutes	Clostridia	Eubacteriales	Clostridiaceae	Oceanirhabdus	Oceanirhabdus seepicola	Mangrove: Water	uTitan(L):Qiagen	Oceanirhabdus seepicola	0	83	83
sp1475	33.9925	-7.94261	2.12517	-3.7374	0.000185932	0.0034154	Bacteria	Bacteria_none	Proteobacteria	Gammaproteobacteria	Cellvibrionales	Spongiibacteraceae	Oceanicoccus	Oceanicoccus sagamiensis	Coral-W	uTitan(L):uTitan(F)	Oceanicoccus sagamiensis	0	191	191
sp666	15.8104	-7.9479	1.71363	-4.63805	3.52E-06	0.000123872	Bacteria	Bacteria_none	Cyanobacteria	Cyanobacteria_Incertae_sedis	Oscillatoriales	Oscillatoriaceae	Oscillatoria	Oscillatoria sancta	Mangrove: Sediment	uTitan(L):Qiagen	Oscillatoria sancta	0	91	91
sp404	14.0446	-7.94913	2.72827	-2.91361	0.00357271	0.0378026	Bacteria	Bacteria_none	Proteobacteria	Alphaproteobacteria	Rhodobacterales	Rhodobacteraceae	Rhodovulum	Rhodovulum phaeolacus	Mangrove: Water	uTitan(L):uTitan(F)	Rhodovulum phaeolacus	0	68	68
sp2174	34.2348	-7.95229	2.27466	-3.49603	0.000472239	0.00767015	Bacteria	Bacteria_none	Proteobacteria	Alphaproteobacteria	Rickettsiales	Rickettsiaceae	Rickettsia	Rickettsia prowazekii	Coral-W	uTitan(L):uTitan(F)	Rickettsia prowazekii	0	175	175
sp4805	14.2775	-7.96771	2.70649	-2.94393	0.00324072	0.0353595	Bacteria	Bacteria_none	Proteobacteria	Gammaproteobacteria	Thiotrichales	Piscirickettsiaceae	Thiomicrorhabdus	Thiomicrorhabdus heinhorstiae	Mangrove: Water	uTitan(L):uTitan(F)	Thiomicrorhabdus heinhorstiae	0	58	58
sp3700	16.1964	-7.98159	2.70577	-2.94984	0.00317935	0.0266467	Bacteria	Bacteria_none	Cyanobacteria	Cyanobacteria_Incertae_sedis	Oscillatoriales	Oscillatoriaceae	Aerosakkonema	Aerosakkonema funiforme	Mangrove: Sediment	uTitan(L):Qiagen	Aerosakkonema funiforme	0	89	89
sp2473	35.3848	-8.0013	2.07504	-3.85597	0.000115272	0.00226217	Bacteria	Bacteria_none	Proteobacteria	Alphaproteobacteria	Hyphomicrobiales	Phyllobacteriaceae	Nitratireductor	Nitratireductor aquimarinus	Coral-W	uTitan(L):uTitan(F)	Nitratireductor aquimarinus	0	213	213
sp591	14.6362	-8.01152	2.69002	-2.97823	0.00289915	0.0323714	Bacteria	Bacteria_none	Planctomycetota	Planctomycetia	Planctomycetales	Planctomycetaceae	Caulifigura	Caulifigura coniformis	Mangrove: Water	uTitan(L):uTitan(F)	Caulifigura coniformis	0	89	89
sp2631	14.6358	-8.0137	2.66481	-3.00723	0.00263641	0.0303529	Bacteria	Bacteria_none	Proteobacteria	Deltaproteobacteria	Syntrophobacterales	Syntrophobacteraceae	Syntrophobacter	Syntrophobacter wolinii	Mangrove: Water	uTitan(L):uTitan(F)	Syntrophobacter wolinii	0	108	108
sp3013	16.5144	-8.03664	1.40632	-5.71464	1.10E-08	5.08E-07	Bacteria	Bacteria_none	Firmicutes	Clostridia	Eubacteriales	Vallitaleaceae	Vallitalea	Vallitalea okinawensis	Mangrove: Water	uTitan(L):Qiagen	Vallitalea okinawensis	0	91	91
sp3400	16.8388	-8.03872	2.72536	-2.9496	0.00318185	0.0266467	Bacteria	Bacteria_none	Proteobacteria	Gammaproteobacteria	Cellvibrionales	Cellvibrionaceae	Simiduia	Simiduia aestuariiviva	Mangrove: Sediment	uTitan(L):Qiagen	Simiduia aestuariiviva	0	103	103
sp2956	16.9227	-8.04442	1.68551	-4.77268	1.82E-06	7.79E-05	Bacteria	Bacteria_none	Actinobacteria	Thermoleophilia	Miltoncostaeales	Miltoncostaeaceae	Miltoncostaea	Miltoncostaea oceani	Mangrove: Sediment	uTitan(L):Qiagen	Miltoncostaea oceani	0	93	93
sp2388	15.1392	-8.05092	2.73348	-2.9453	0.00322644	0.0353595	Bacteria	Bacteria_none	Proteobacteria	Gammaproteobacteria	Cellvibrionales	Microbulbiferaceae	Microbulbifer	Microbulbifer elongatus	Mangrove: Water	uTitan(L):uTitan(F)	Microbulbifer elongatus	0	52	52
sp3860	15.0044	-8.06385	2.51805	-3.20242	0.00136276	0.0205158	Bacteria	Bacteria_none	Firmicutes	Clostridia	Eubacteriales	Clostridiaceae	Clostridium	Clostridium disporicum	Coral-W	uTitan(L):Qiagen	Clostridium disporicum	0	40	40
sp2892	15.4825	-8.08412	2.70962	-2.98349	0.00284981	0.0321147	Bacteria	Bacteria_none	Bacteroidota	Flavobacteriia	Flavobacteriales	Weeksellaceae	Spongiimonas	Spongiimonas flava	Mangrove: Water	uTitan(L):uTitan(F)	Spongiimonas flava	0	53	53
sp1536	37.7125	-8.09197	2.14099	-3.77954	0.000157121	0.00295515	Bacteria	Bacteria_none	Planctomycetota	Planctomycetia	Pirellulales	Pirellulaceae	Bremerella	Bremerella cremea	Coral-W	uTitan(L):uTitan(F)	Bremerella cremea	0	199	199
sp1703	17.5539	-8.09748	2.18319	-3.70902	0.00020806	0.00359009	Bacteria	Bacteria_none	Proteobacteria	Gammaproteobacteria	Moraxellales	Moraxellaceae	Acinetobacter	Acinetobacter tandoii	Mangrove: Sediment	uTitan(L):Qiagen	Acinetobacter tandoii	0	96	96
sp1380	15.5073	-8.0982	2.1008	-3.85483	0.000115812	0.00289138	Bacteria	Bacteria_none	Proteobacteria	Alphaproteobacteria	Hyphomicrobiales	Hyphomicrobiaceae	Filomicrobium	Filomicrobium fusiforme	Mangrove: Water	uTitan(L):uTitan(F)	Filomicrobium fusiforme	0	103	103
sp2902	24.0196	-8.12986	2.311	-3.5179	0.000434973	0.0169336	Bacteria	Bacteria_none	Proteobacteria	Alphaproteobacteria	Rhodospirillales	Rhodospirillaceae	Telmatospirillum	Telmatospirillum siberiense	Mangrove: Sediment	uTitan(L):uTitan(F)	Telmatospirillum siberiense	0	157	157
sp3650	15.7131	-8.13239	2.48612	-3.27112	0.00107123	0.0173918	Bacteria	Bacteria_none	Proteobacteria	Alphaproteobacteria	Hyphomicrobiales	Phyllobacteriaceae	Nitratireductor	Nitratireductor aquibiodomus	Coral-W	uTitan(L):Qiagen	Nitratireductor aquibiodomus	0	44	44
sp2603	18.3937	-8.16509	1.74878	-4.66901	3.03E-06	0.000111159	Bacteria	Bacteria_none	Tenericutes	Mollicutes	Entomoplasmatales	Spiroplasmataceae	Spiroplasma	Spiroplasma leptinotarsae	Mangrove: Sediment	uTitan(L):Qiagen	Spiroplasma leptinotarsae	0	102	102
sp2874	39.813	-8.17108	2.02188	-4.04133	5.31E-05	0.0011234	Bacteria	Bacteria_none	Actinobacteria	Actinomycetia	Micrococcales	Brevibacteriaceae	Brevibacterium	Brevibacterium casei	Coral-W	uTitan(L):uTitan(F)	Brevibacterium casei	0	233	233
sp3619	17.003	-8.22497	2.67462	-3.07519	0.00210366	0.0256832	Bacteria	Bacteria_none	Proteobacteria	Epsilonproteobacteria	Campylobacterales	Campylobacteraceae	Campylobacter	Campylobacter pinnipediorum	Mangrove: Water	uTitan(L):uTitan(F)	Campylobacter pinnipediorum	0	83	83
sp1208	19.2962	-8.25991	1.40603	-5.87463	4.24E-09	2.16E-07	Bacteria	Bacteria_none	Proteobacteria	Alphaproteobacteria	Hyphomicrobiales	Hyphomicrobiaceae	Methyloceanibacter	Methyloceanibacter caenitepidi	Mangrove: Water	uTitan(L):Qiagen	Methyloceanibacter caenitepidi	0	104	104
sp2078	42.4956	-8.2649	2.00136	-4.12964	3.63E-05	0.000824452	Bacteria	Bacteria_none	Proteobacteria	Gammaproteobacteria	Alteromonadales	Alteromonadaceae	Alteromonas	Alteromonas portus	Coral-W	uTitan(L):uTitan(F)	Alteromonas portus	0	243	243
sp702	42.9754	-8.28209	1.97624	-4.19083	2.78E-05	0.000703032	Bacteria	Bacteria_none	Proteobacteria	Gammaproteobacteria	Alteromonadales	Pseudoalteromonadaceae	Algicola	Algicola bacteriolytica	Coral-W	uTitan(L):uTitan(F)	Algicola bacteriolytica	0	267	267
sp3052	19.9663	-8.28393	2.65667	-3.11817	0.00181979	0.018037	Bacteria	Bacteria_none	Tenericutes	Mollicutes	Haloplasmatales	Haloplasmataceae	Haloplasma	Haloplasma contractile	Mangrove: Sediment	uTitan(L):Qiagen	Haloplasma contractile	0	116	116
sp1458	43.2847	-8.29101	2.03059	-4.08305	4.44E-05	0.000965978	Bacteria	Bacteria_none	Proteobacteria	Gammaproteobacteria	Vibrionales	Vibrionaceae	Vibrio	Vibrio porteresiae	Coral-W	uTitan(L):uTitan(F)	Vibrio porteresiae	0	236	236
sp2067	20.1655	-8.29742	2.71897	-3.05168	0.00227564	0.0208209	Bacteria	Bacteria_none	Cyanobacteria	Cyanobacteria_Incertae_sedis	Chroococcales	Microcystaceae	Microcystis	Microcystis aeruginosa	Mangrove: Sediment	uTitan(L):Qiagen	Microcystis aeruginosa	0	106	106
sp838	43.6701	-8.30393	2.01079	-4.12969	3.63E-05	0.000824452	Bacteria	Bacteria_none	Proteobacteria	Gammaproteobacteria	Chromatiales	Chromatiaceae	Thiodictyon	Candidatus Thiodictyon syntrophicum	Coral-W	uTitan(L):uTitan(F)	Candidatus Thiodictyon syntrophicum	0	242	242
sp3171	20.521	-8.32306	2.13337	-3.90137	9.57E-05	0.00191618	Bacteria	Bacteria_none	Cyanobacteria	Cyanobacteria_Incertae_sedis	Oscillatoriales	Coleofasciculaceae	Crustifilum	Crustifilum hispaliculae	Mangrove: Sediment	uTitan(L):Qiagen	Crustifilum hispaliculae	0	114	114
sp341	17.9867	-8.3238	2.37409	-3.5061	0.000454726	0.00875612	Bacteria	Bacteria_none	Proteobacteria	Deltaproteobacteria	Deltaproteobacteria_Incertae_sedis	Deltaproteobacteria_Incertae_sedis_Incertae_sedis	Deferrisoma	Deferrisoma camini	Coral-W	uTitan(L):Qiagen	Deferrisoma camini	0	46	46
sp3082	20.7934	-8.34284	1.66951	-4.99719	5.82E-07	2.77E-05	Bacteria	Bacteria_none	Cyanobacteria	Cyanobacteria_Incertae_sedis	Chroococcales	Aphanothecaceae	Gloeothece	Gloeothece aequatorialis	Mangrove: Sediment	uTitan(L):Qiagen	Gloeothece aequatorialis	0	119	119
sp584	20.9729	-8.35424	1.61291	-5.17961	2.22E-07	1.19E-05	Bacteria	Bacteria_none	Cyanobacteria	Cyanobacteria_Incertae_sedis	Chroococcales	Chroococcaceae	Neochroococcus	Neochroococcus gongqingensis	Mangrove: Sediment	uTitan(L):Qiagen	Neochroococcus gongqingensis	0	116	116
sp2594	18.9577	-8.38003	2.623	-3.19483	0.00139915	0.0186471	Bacteria	Bacteria_none	Firmicutes	Clostridia	Eubacteriales	Eubacteriales_Incertae_sedis	Intestinimonas	Intestinimonas gabonensis	Mangrove: Water	uTitan(L):uTitan(F)	Intestinimonas gabonensis	0	95	95
sp2972	28.7926	-8.38676	1.84479	-4.54619	5.46E-06	0.000265054	Bacteria	Bacteria_none	Proteobacteria	Alphaproteobacteria	Rickettsiales	Anaplasmataceae	Anaplasma	Anaplasma odocoilei	Mangrove: Sediment	uTitan(L):uTitan(F)	Anaplasma odocoilei	0	195	195
sp2590	19.0362	-8.38851	2.61358	-3.20958	0.00132928	0.0180202	Bacteria	Bacteria_none	Proteobacteria	Betaproteobacteria	Burkholderiales	Burkholderiales_Incertae_sedis	Aquabacterium	Aquabacterium commune	Mangrove: Water	uTitan(L):uTitan(F)	Aquabacterium commune	0	98	98
sp1443	46.5354	-8.39595	1.95868	-4.28653	1.81E-05	0.000491293	Bacteria	Bacteria_none	Bacteroidota	Cytophagia	Cytophagales	Reichenbachiellaceae	Reichenbachiella	Reichenbachiella versicolor	Coral-W	uTitan(L):uTitan(F)	Reichenbachiella versicolor	0	267	267
sp1269	19.1888	-8.40106	2.59323	-3.23961	0.00119694	0.0170487	Bacteria	Bacteria_none	Firmicutes	Tissierellia	Tissierellales	Thermohalobacteraceae	Thermohalobacter	Thermohalobacter berrensis	Mangrove: Water	uTitan(L):uTitan(F)	Thermohalobacter berrensis	0	113	113
sp2822	47.1752	-8.41522	1.98964	-4.22951	2.34E-05	0.000612483	Bacteria	Bacteria_none	Proteobacteria	Gammaproteobacteria	Oceanospirillales	Halomonadaceae	Halomonas	Halomonas salina	Coral-W	uTitan(L):uTitan(F)	Halomonas salina	0	258	258
sp2062	19.4509	-8.41976	2.60501	-3.23215	0.00122863	0.017051	Bacteria	Bacteria_none	Proteobacteria	Gammaproteobacteria	Cardiobacteriales	Cardiobacteriaceae	Suttonella	Suttonella ornithocola	Mangrove: Water	uTitan(L):uTitan(F)	Suttonella ornithocola	0	102	102
sp2195	47.6016	-8.42947	1.93009	-4.36739	1.26E-05	0.000346455	Bacteria	Bacteria_none	Proteobacteria	Alphaproteobacteria	Sphingomonadales	Sphingosinicellaceae	Pacificimonas	Pacificimonas flava	Coral-W	uTitan(L):uTitan(F)	Pacificimonas flava	0	293	293
sp2591	19.7979	-8.44808	2.56618	-3.29208	0.000994496	0.0148307	Bacteria	Bacteria_none	Proteobacteria	Gammaproteobacteria	Vibrionales	Vibrionaceae	Paraphotobacterium	Paraphotobacterium marinum	Mangrove: Water	uTitan(L):uTitan(F)	Paraphotobacterium marinum	0	137	137
sp2635	22.6556	-8.4654	2.69292	-3.14358	0.00166898	0.0169602	Bacteria	Bacteria_none	Proteobacteria	Gammaproteobacteria	Thiotrichales	Piscirickettsiaceae	Hydrogenovibrio	Hydrogenovibrio crunogenus	Mangrove: Sediment	uTitan(L):Qiagen	Hydrogenovibrio crunogenus	0	118	118
sp3729	20.1349	-8.48548	2.29548	-3.69661	0.000218499	0.00476098	Bacteria	Bacteria_none	Firmicutes	Clostridia	Eubacteriales	Lachnospiraceae	Cellulosilyticum	Cellulosilyticum lentocellum	Coral-W	uTitan(L):Qiagen	Cellulosilyticum lentocellum	0	50	50
sp3749	20.5858	-8.49763	2.12424	-4.00031	6.33E-05	0.00169352	Bacteria	Bacteria_none	Proteobacteria	Alphaproteobacteria	Hyphomicrobiales	Rhizobiaceae	Mycoplana	Mycoplana dimorpha	Mangrove: Water	uTitan(L):uTitan(F)	Mycoplana dimorpha	0	97	97
sp2590	31.353	-8.50744	2.66372	-3.19382	0.00140402	0.0431252	Bacteria	Bacteria_none	Proteobacteria	Betaproteobacteria	Burkholderiales	Burkholderiales_Incertae_sedis	Aquabacterium	Aquabacterium commune	Mangrove: Sediment	uTitan(L):uTitan(F)	Aquabacterium commune	0	101	101
sp1658	50.6529	-8.51798	1.94364	-4.3825	1.17E-05	0.000329156	Bacteria	Bacteria_none	Proteobacteria	Gammaproteobacteria	Alteromonadales	Alteromonadaceae	Alteromonas	Alteromonas australica	Coral-W	uTitan(L):uTitan(F)	Alteromonas australica	0	282	282
sp3511	23.5788	-8.52314	2.67286	-3.18878	0.00142876	0.0153696	Bacteria	Bacteria_none	Firmicutes	Clostridia	Halanaerobiales	Halobacteroidaceae	Halanaerobacter	Halanaerobacter jeridensis	Mangrove: Sediment	uTitan(L):Qiagen	Halanaerobacter jeridensis	0	125	125
sp944	20.9896	-8.53394	2.0858	-4.09146	4.29E-05	0.0012533	Bacteria	Bacteria_none	Planctomycetota	Planctomycetia	Pirellulales	Lacipirellulaceae	Adhaeretor	Adhaeretor mobilis	Mangrove: Water	uTitan(L):uTitan(F)	Adhaeretor mobilis	0	144	144
sp703	20.7754	-8.53449	2.27437	-3.75247	0.000175104	0.00414245	Bacteria	Bacteria_none	Firmicutes	Clostridia	Eubacteriales	Clostridiaceae	Clostridium	Clostridium paraputrificum	Coral-W	uTitan(L):Qiagen	Clostridium paraputrificum	0	57	57
sp2851	23.8518	-8.54036	2.11639	-4.03534	5.45E-05	0.00125161	Bacteria	Bacteria_none	Cyanobacteria	Cyanobacteria_Incertae_sedis	Pseudanabaenales	Prochlorotrichaceae	Nodosilinea	Nodosilinea nodulosa	Mangrove: Sediment	uTitan(L):Qiagen	Nodosilinea nodulosa	0	135	135
sp3063	21.4913	-8.56388	2.58045	-3.31875	0.000904215	0.0139525	Bacteria	Bacteria_none	Proteobacteria	Gammaproteobacteria	Legionellales	Legionellaceae	Legionella	Legionella feeleii	Mangrove: Water	uTitan(L):uTitan(F)	Legionella feeleii	0	119	119
sp2472	21.9599	-8.59259	2.65978	-3.23056	0.00123547	0.017051	Bacteria	Bacteria_none	Proteobacteria	Gammaproteobacteria	Pseudomonadales	Pseudomonadaceae	Pseudomonas	Pseudomonas alcaligenes	Mangrove: Water	uTitan(L):uTitan(F)	Pseudomonas alcaligenes	0	93	93
sp1657	22.0247	-8.59569	2.60146	-3.30418	0.000952548	0.0143938	Bacteria	Bacteria_none	Planctomycetota	Planctomycetia	Pirellulales	Pirellulaceae	Roseimaritima	Roseimaritima multifibrata	Mangrove: Water	uTitan(L):uTitan(F)	Roseimaritima multifibrata	0	101	101
sp1967	33.9706	-8.63262	2.54683	-3.38956	0.00070006	0.024934	Bacteria	Bacteria_none	Firmicutes	Bacilli	Lactobacillales	Enterococcaceae	Enterococcus	Enterococcus hirae	Mangrove: Sediment	uTitan(L):uTitan(F)	Enterococcus hirae	0	498	498
sp750	55.3339	-8.64634	1.871	-4.62124	3.81E-06	0.000113186	Bacteria	Bacteria_none	Planctomycetota	Planctomycetia	Pirellulales	Lacipirellulaceae	Botrimarina	Botrimarina colliarenosi	Coral-W	uTitan(L):uTitan(F)	Botrimarina colliarenosi	0	333	333
sp827	23.2922	-8.68048	2.04821	-4.23808	2.25E-05	0.000715602	Bacteria	Bacteria_none	Planctomycetota	Planctomycetia	Pirellulales	Pirellulaceae	Blastopirellula	Blastopirellula retiformator	Mangrove: Water	uTitan(L):uTitan(F)	Blastopirellula retiformator	0	126	126
sp543	24.0553	-8.71648	1.65208	-5.27606	1.32E-07	7.15E-06	Bacteria	Bacteria_none	Planctomycetota	Planctomycetia	Pirellulales	Pirellulaceae	Rhodopirellula	Rhodopirellula rosea	Mangrove: Water	uTitan(L):uTitan(F)	Rhodopirellula rosea	0	99	99
sp1741	60.4401	-8.773	1.86469	-4.70481	2.54E-06	7.88E-05	Bacteria	Bacteria_none	Proteobacteria	Gammaproteobacteria	Alteromonadales	Alteromonadaceae	Alteromonas	Alteromonas confluentis	Coral-W	uTitan(L):uTitan(F)	Alteromonas confluentis	0	342	342
sp1164	29.6498	-8.87904	1.35932	-6.53197	6.49E-11	4.84E-09	Bacteria	Bacteria_none	Proteobacteria	Gammaproteobacteria	Cellvibrionales	Halieaceae	Parahaliea	Parahaliea maris	Mangrove: Water	uTitan(L):Qiagen	Parahaliea maris	0	156	156
sp2831	27.0428	-8.89392	2.06661	-4.30362	1.68E-05	0.000549053	Bacteria	Bacteria_none	Firmicutes	Clostridia	Eubacteriales	Clostridiaceae	Abyssisolibacter	Abyssisolibacter fermentans	Mangrove: Water	uTitan(L):uTitan(F)	Abyssisolibacter fermentans	0	138	138
sp1935	66.25	-8.9055	1.82844	-4.87056	1.11E-06	3.99E-05	Bacteria	Bacteria_none	Cyanobacteria	Cyanobacteria_Incertae_sedis	Oscillatoriales	Oscillatoriales_Incertae_sedis	Caldora	Caldora penicillata	Coral-W	uTitan(L):uTitan(F)	Caldora penicillata	0	378	378
sp841	33.6442	-9.03619	1.69463	-5.33226	9.70E-08	5.54E-06	Bacteria	Bacteria_none	Cyanobacteria	Cyanobacteria_Incertae_sedis	Chroococcales	Chroococcaceae	Cryptochroococcus	Cryptochroococcus tibeticus	Mangrove: Sediment	uTitan(L):Qiagen	Cryptochroococcus tibeticus	0	185	185
sp248	45.4248	-9.04851	2.58649	-3.49837	0.000468115	0.0180144	Bacteria	Bacteria_none	Proteobacteria	Gammaproteobacteria	Vibrionales	Vibrionaceae	Photobacterium	Photobacterium damselae	Mangrove: Sediment	uTitan(L):uTitan(F)	Photobacterium damselae	0	312	312
sp1645	46.2765	-9.0777	2.51509	-3.60929	0.000307038	0.0120937	Bacteria	Bacteria_none	Firmicutes	Bacilli	Bacillales	Bacillaceae	Alkalibacillus	Alkalibacillus salilacus	Mangrove: Sediment	uTitan(L):uTitan(F)	Alkalibacillus salilacus	0	688	688
sp700	31.243	-9.10523	2.50399	-3.63629	0.000276588	0.00579791	Bacteria	Bacteria_none	Actinobacteria	Actinomycetia	Catenulisporales	Actinospicaceae	Actinospica	Actinospica durhamensis	Mangrove: Water	uTitan(L):uTitan(F)	Actinospica durhamensis	0	222	222
sp3154	35.4166	-9.11047	2.61821	-3.47965	0.000502066	0.00686602	Bacteria	Bacteria_none	Bacteroidota	Cytophagia	Cytophagales	Hymenobacteraceae	Rufibacter	Rufibacter tibetensis	Mangrove: Sediment	uTitan(L):Qiagen	Rufibacter tibetensis	0	197	197
sp1893	76.6113	-9.11625	1.76166	-5.17481	2.28E-07	1.07E-05	Bacteria	Bacteria_none	Proteobacteria	Gammaproteobacteria	Alteromonadales	Alteromonadaceae	Salinimonas	Salinimonas lutimaris	Coral-W	uTitan(L):uTitan(F)	Salinimonas lutimaris	0	480	480
sp2022	31.771	-9.12563	2.09457	-4.35681	1.32E-05	0.000444306	Bacteria	Bacteria_none	Planctomycetota	Planctomycetia	Pirellulales	Pirellulaceae	Rhodopirellula	Rhodopirellula heiligendammensis	Mangrove: Water	uTitan(L):uTitan(F)	Rhodopirellula heiligendammensis	0	159	159
sp2674	36.3623	-9.14835	2.09996	-4.35643	1.32E-05	0.000404632	Bacteria	Bacteria_none	Firmicutes	Clostridia	Eubacteriales	Clostridiaceae	Lutispora	Lutispora thermophila	Mangrove: Sediment	uTitan(L):Qiagen	Lutispora thermophila	0	199	199
sp1614	79.748	-9.17271	1.81091	-5.06526	4.08E-07	1.70E-05	Bacteria	Bacteria_none	Proteobacteria	Alphaproteobacteria	Hyphomicrobiales	Devosiaceae	Pelagibacterium	Pelagibacterium halotolerans	Coral-W	uTitan(L):uTitan(F)	Pelagibacterium halotolerans	0	435	435
sp1401	53.0399	-9.27487	1.7765	-5.22088	1.78E-07	9.03E-06	Bacteria	Bacteria_none	Proteobacteria	Gammaproteobacteria	Vibrionales	Vibrionaceae	Vibrio	Vibrio viridaestus	Mangrove: Sediment	uTitan(L):uTitan(F)	Vibrio viridaestus	0	653	653
sp266	76.915	-9.29587	3.04768	-3.05015	0.0022873	0.0365967	Bacteria	Bacteria_none	Proteobacteria	Gammaproteobacteria	Oceanospirillales	Endozoicomonadaceae	Parendozoicomonas	Parendozoicomonas haliclonae	Coral1	uTitan(L):Qiagen	Parendozoicomonas haliclonae	0	628	628
sp341	87.9905	-9.31536	1.72799	-5.39085	7.01E-08	4.01E-06	Bacteria	Bacteria_none	Proteobacteria	Deltaproteobacteria	Deltaproteobacteria_Incertae_sedis	Deltaproteobacteria_Incertae_sedis_Incertae_sedis	Deferrisoma	Deferrisoma camini	Coral-W	uTitan(L):uTitan(F)	Deferrisoma camini	0	522	522
sp1931	89.6921	-9.3426	1.73974	-5.37012	7.87E-08	4.34E-06	Bacteria	Bacteria_none	Proteobacteria	Alphaproteobacteria	Rhodobacterales	Rhodobacteraceae	Paracoccus	Paracoccus rhizosphaerae	Coral-W	uTitan(L):uTitan(F)	Paracoccus rhizosphaerae	0	513	513
sp369	91.916	-9.37847	1.71368	-5.47272	4.43E-08	2.74E-06	Bacteria	Bacteria_none	Proteobacteria	Gammaproteobacteria	Chromatiales	Granulosicoccaceae	Granulosicoccus	Granulosicoccus antarcticus	Coral-W	uTitan(L):uTitan(F)	Granulosicoccus antarcticus	0	552	552
sp1959	42.683	-9.37955	1.62913	-5.75741	8.54E-09	5.36E-07	Bacteria	Bacteria_none	Cyanobacteria	Cyanobacteria_Incertae_sedis	Oscillatoriales	Coleofasciculaceae	Marmoreocelis	Marmoreocelis xerophila	Mangrove: Sediment	uTitan(L):Qiagen	Marmoreocelis xerophila	0	236	236
sp2648	58.5888	-9.4097	2.33596	-4.02819	5.62E-05	0.00244398	Bacteria	Bacteria_none	Proteobacteria	Gammaproteobacteria	Oceanospirillales	Saccharospirillaceae	Reinekea	Reinekea marina	Mangrove: Sediment	uTitan(L):uTitan(F)	Reinekea marina	0	174	174
sp1899	43.7938	-9.41661	2.58033	-3.64939	0.000262868	0.00422396	Bacteria	Bacteria_none	Cyanobacteria	Cyanobacteria_Incertae_sedis	Pseudanabaenales	Oculatellaceae	Oculatella	Oculatella mojaviensis	Mangrove: Sediment	uTitan(L):Qiagen	Oculatella mojaviensis	0	234	234
sp2026	60.5177	-9.45871	2.15737	-4.38437	1.16E-05	0.000540906	Bacteria	Bacteria_none	Proteobacteria	Gammaproteobacteria	Vibrionales	Vibrionaceae	Photobacterium	Photobacterium galatheae	Mangrove: Sediment	uTitan(L):uTitan(F)	Photobacterium galatheae	0	431	431
sp447	104.816	-9.56706	1.75759	-5.44327	5.23E-08	3.10E-06	Bacteria	Bacteria_none	Proteobacteria	Alphaproteobacteria	Rhodospirillales	Rhodospirillaceae	Caenispirillum	Caenispirillum salinarum	Coral-W	uTitan(L):uTitan(F)	Caenispirillum salinarum	0	565	565
sp1033	62.9565	-10.1089	1.62986	-6.20232	5.56E-10	4.42E-08	Bacteria	Bacteria_none	Proteobacteria	Betaproteobacteria	Burkholderiales	Comamonadaceae	Delftia	Delftia acidovorans	Mangrove: Water	uTitan(L):uTitan(F)	Delftia acidovorans	0	245	245
sp700	221.389	-11.782	2.83765	-4.15203	3.30E-05	0.000484322	Bacteria	Bacteria_none	Actinobacteria	Actinomycetia	Catenulisporales	Actinospicaceae	Actinospica	Actinospica durhamensis	Mangrove: Water	uTitan(L):Qiagen	Actinospica durhamensis	0	1241	1241
sp159	872.569	-12.8408	3.90681	-3.28677	0.00101344	0.0310112	Bacteria	Bacteria_none	Proteobacteria	Gammaproteobacteria	Oceanospirillales	Endozoicomonadaceae	Endozoicomonas	Endozoicomonas acroporae	Coral1	uTitan(L):uTitan(F)	Endozoicomonas acroporae	0	0	7490
sp3260	6.88463	-20.9019	3.39162	-6.1628	7.15E-10	4.51E-08	Bacteria	Bacteria_none	Bacteroidota	Cytophagia	Cytophagales	Cyclobacteriaceae	Mongoliitalea	Mongoliitalea lutea	Mangrove: Sediment	uTitan(L):uTitan(F)	Mongoliitalea lutea	0	112	112
sp3704	7.19193	-20.9648	3.39127	-6.18197	6.33E-10	4.16E-08	Bacteria	Bacteria_none	Firmicutes	Bacilli	Lactobacillales	Enterococcaceae	Enterococcus	Enterococcus pseudoavium	Mangrove: Sediment	uTitan(L):uTitan(F)	Enterococcus pseudoavium	0	103	103
sp4017	10.113	-21.0824	2.94851	-7.15019	8.67E-13	1.06E-10	Bacteria	Bacteria_none	Tenericutes	Mollicutes	Entomoplasmatales	Spiroplasmataceae	Spiroplasma	Spiroplasma phoeniceum	Mangrove: Water	uTitan(L):Qiagen	Spiroplasma phoeniceum	0	59	59
sp3692	8.30912	-21.1716	3.35151	-6.31704	2.67E-10	1.94E-08	Bacteria	Bacteria_none	Firmicutes	Bacilli	Lactobacillales	Enterococcaceae	Enterococcus	Enterococcus dispar	Mangrove: Sediment	uTitan(L):uTitan(F)	Enterococcus dispar	0	119	119
sp2471	8.66726	-21.2254	3.32639	-6.38091	1.76E-10	1.44E-08	Bacteria	Bacteria_none	Proteobacteria	Gammaproteobacteria	Vibrionales	Vibrionaceae	Vibrio	Vibrio palustris	Mangrove: Sediment	uTitan(L):uTitan(F)	Vibrio palustris	0	141	141
sp1300	9.00736	-21.2769	3.31336	-6.42155	1.35E-10	1.24E-08	Bacteria	Bacteria_none	Proteobacteria	Gammaproteobacteria	Vibrionales	Vibrionaceae	Photobacterium	Photobacterium aquae	Mangrove: Sediment	uTitan(L):uTitan(F)	Photobacterium aquae	0	129	129
sp3649	9.63578	-21.3524	3.28365	-6.50266	7.89E-11	8.52E-09	Bacteria	Bacteria_none	Firmicutes	Bacilli	Bacillales	Bacillaceae	Domibacillus	Domibacillus epiphyticus	Mangrove: Sediment	uTitan(L):uTitan(F)	Domibacillus epiphyticus	0	138	138
sp1954	10.204	-21.4324	3.25499	-6.58447	4.57E-11	5.09E-09	Bacteria	Bacteria_none	Proteobacteria	Gammaproteobacteria	Thiotrichales	Piscirickettsiaceae	Thiomicrospira	Thiomicrospira thyasirae	Mangrove: Sediment	uTitan(L):uTitan(F)	Thiomicrospira thyasirae	0	166	166
sp277	19.1973	-21.4574	3.9086	-5.48979	4.02E-08	2.05E-06	Bacteria	Bacteria_none	Proteobacteria	Gammaproteobacteria	Chromatiales	Wenzhouxiangellaceae	Wenzhouxiangella	Wenzhouxiangella marina	Coral1	uTitan(L):uTitan(F)	Wenzhouxiangella marina	0	0	119
sp3402	10.4737	-21.4596	3.24947	-6.60403	4.00E-11	4.62E-09	Bacteria	Bacteria_none	Actinobacteria	Actinomycetia	Streptosporangiales	Nocardiopsaceae	Nocardiopsis	Nocardiopsis rhizosphaerae	Mangrove: Sediment	uTitan(L):uTitan(F)	Nocardiopsis rhizosphaerae	0	150	150
sp2876	10.5728	-21.4935	3.24091	-6.63194	3.31E-11	3.96E-09	Bacteria	Bacteria_none	Chlamydiae	Chlamydiia	Chlamydiales	Chlamydiaceae	Chlamydia	Chlamydia gallinacea	Mangrove: Sediment	uTitan(L):uTitan(F)	Chlamydia gallinacea	0	172	172
sp129	19.3479	-21.5714	3.90879	-5.5187	3.42E-08	6.56E-07	Bacteria	Bacteria_none	Cyanobacteria	Cyanobacteria_Incertae_sedis	Pleurocapsales	Pleurocapsales_Incertae_sedis	Odorella	Odorella benthonica	Coral1	uTitan(L):Qiagen	Odorella benthonica	0	172	172
sp1705	7.7927	-21.6183	3.39166	-6.37395	1.84E-10	1.52E-08	Bacteria	Bacteria_none	Proteobacteria	Alphaproteobacteria	Hyphomicrobiales	Amorphaceae	Acuticoccus	Acuticoccus yangtzensis	Mangrove: Water	uTitan(L):uTitan(F)	Acuticoccus yangtzensis	0	59	59
sp1768	11.7218	-21.6289	3.24302	-6.66938	2.57E-11	3.19E-09	Bacteria	Bacteria_none	Proteobacteria	Alphaproteobacteria	Caulobacterales	Caulobacteraceae	Caulobacter	Caulobacter vibrioides	Mangrove: Sediment	uTitan(L):uTitan(F)	Caulobacter vibrioides	0	66	66
sp4272	7.92478	-21.6406	3.39153	-6.38078	1.76E-10	1.51E-08	Bacteria	Bacteria_none	Proteobacteria	Alphaproteobacteria	Rhodobacterales	Roseobacteraceae	Litoreibacter	Litoreibacter janthinus	Mangrove: Water	uTitan(L):uTitan(F)	Litoreibacter janthinus	0	60	60
sp3359	12.4322	-21.7081	3.22311	-6.73513	1.64E-11	2.28E-09	Bacteria	Bacteria_none	Proteobacteria	Gammaproteobacteria	Alteromonadales	Idiomarinaceae	Pseudidiomarina	Pseudidiomarina aestuarii	Mangrove: Sediment	uTitan(L):uTitan(F)	Pseudidiomarina aestuarii	0	70	70
sp3254	12.8477	-21.7573	3.17747	-6.84736	7.52E-12	1.26E-09	Bacteria	Bacteria_none	Proteobacteria	Gammaproteobacteria	Xanthomonadales	Xanthomonadaceae	Pseudoxanthomonas	Pseudoxanthomonas koreensis	Mangrove: Sediment	uTitan(L):uTitan(F)	Pseudoxanthomonas koreensis	0	184	184
sp1640	8.58518	-21.7603	3.3909	-6.41725	1.39E-10	1.24E-08	Bacteria	Bacteria_none	Proteobacteria	Alphaproteobacteria	Rhodospirillales	Rhodospirillaceae	Ferrovibrio	Ferrovibrio xuzhouensis	Mangrove: Water	uTitan(L):uTitan(F)	Ferrovibrio xuzhouensis	0	65	65
sp4118	13.6755	-21.7807	3.19342	-6.82048	9.07E-12	1.45E-09	Bacteria	Bacteria_none	Proteobacteria	Gammaproteobacteria	Pasteurellales	Pasteurellaceae	Pasteurella	Pasteurella langaaensis	Mangrove: Sediment	uTitan(L):uTitan(F)	Pasteurella langaaensis	0	77	77
sp4543	9.1135	-21.8401	3.39047	-6.44162	1.18E-10	1.14E-08	Bacteria	Bacteria_none	Proteobacteria	Gammaproteobacteria	Vibrionales	Vibrionaceae	Photobacterium	Photobacterium sanctipauli	Mangrove: Water	uTitan(L):uTitan(F)	Photobacterium sanctipauli	0	69	69
sp1785	16.4765	-21.8787	3.90945	-5.59636	2.19E-08	3.43E-07	Bacteria	Bacteria_none	Proteobacteria	Gammaproteobacteria	Thiotrichales	Francisellaceae	Francisella	Francisella halioticida	Coral2	uTitan(L):uTitan(F)	Francisella halioticida	0	75	75
sp4080	9.54259	-21.8951	3.39016	-6.45844	1.06E-10	1.07E-08	Bacteria	Bacteria_none	Proteobacteria	Alphaproteobacteria	Hyphomicrobiales	Aurantimonadaceae	Martelella	Martelella mangrovi	Mangrove: Water	uTitan(L):uTitan(F)	Martelella mangrovi	0	62	62
sp3143	9.50974	-21.9004	3.39017	-6.45996	1.05E-10	1.07E-08	Bacteria	Bacteria_none	Firmicutes	Clostridia	Eubacteriales	Clostridiaceae	Caloramator	Caloramator coolhaasii	Mangrove: Water	uTitan(L):uTitan(F)	Caloramator coolhaasii	0	72	72
sp2709	15.1519	-21.9662	3.1298	-7.01838	2.24E-12	3.96E-10	Bacteria	Bacteria_none	Proteobacteria	Alphaproteobacteria	Rhodospirillales	Azospirillaceae	Skermanella	Skermanella mucosa	Mangrove: Sediment	uTitan(L):uTitan(F)	Skermanella mucosa	0	217	217
sp679	10.4343	-22.0205	3.38957	-6.49653	8.22E-11	9.13E-09	Bacteria	Bacteria_none	Proteobacteria	Alphaproteobacteria	Rhodospirillales	Rhodospirillaceae	Lacibacterium	Lacibacterium aquatile	Mangrove: Water	uTitan(L):uTitan(F)	Lacibacterium aquatile	0	79	79
sp2696	10.4343	-22.0205	3.38957	-6.49653	8.22E-11	9.13E-09	Bacteria	Bacteria_none	Proteobacteria	Gammaproteobacteria	Legionellales	Legionellaceae	Legionella	Legionella fairfieldensis	Mangrove: Water	uTitan(L):uTitan(F)	Legionella fairfieldensis	0	79	79
sp2760	10.5664	-22.0375	3.3895	-6.50171	7.94E-11	9.13E-09	Bacteria	Bacteria_none	Proteobacteria	Gammaproteobacteria	Oceanospirillales	Oceanospirillaceae	Oleispira	Oleispira antarctica	Mangrove: Water	uTitan(L):uTitan(F)	Oleispira antarctica	0	80	80
sp4186	11.9309	-22.0446	3.38799	-6.5067	7.68E-11	1.41E-08	Bacteria	Bacteria_none	Actinobacteria	Rubrobacteria	Rubrobacterales	Rubrobacteraceae	Rubrobacter	Rubrobacter radiotolerans	Mangrove: Sediment	uTitan(L):Qiagen	Rubrobacter radiotolerans	0	65	65
sp1982	35.7748	-22.0797	3.90775	-5.65024	1.60E-08	1.23E-06	Bacteria	Bacteria_none	Proteobacteria	Betaproteobacteria	Burkholderiales	Oxalobacteraceae	Noviherbaspirillum	Noviherbaspirillum suwonense	Coral1	uTitan(L):uTitan(F)	Noviherbaspirillum suwonense	0	0	378
sp1282	12.4816	-22.1089	3.37431	-6.55212	5.67E-11	1.17E-08	Bacteria	Bacteria_none	Bacteroidota	Flavobacteriia	Flavobacteriales	Flavobacteriaceae	Nonlabens	Nonlabens xylanidelens	Mangrove: Sediment	uTitan(L):Qiagen	Nonlabens xylanidelens	0	68	68
sp3723	19.6876	-22.123	3.90901	-5.65949	1.52E-08	3.13E-07	Bacteria	Bacteria_none	Proteobacteria	Betaproteobacteria	Burkholderiales	Oxalobacteraceae	Massilia	Massilia psychrophila	Coral2	uTitan(L):uTitan(F)	Massilia psychrophila	0	122	122
sp248	13.1719	-22.1788	3.3566	-6.60751	3.91E-11	1.00E-08	Bacteria	Bacteria_none	Proteobacteria	Gammaproteobacteria	Vibrionales	Vibrionaceae	Photobacterium	Photobacterium damselae	Mangrove: Sediment	uTitan(L):Qiagen	Photobacterium damselae	0	68	68
sp3092	11.8513	-22.191	3.35557	-6.6132	3.76E-11	5.22E-09	Bacteria	Bacteria_none	Firmicutes	Clostridia	Eubacteriales	Eubacteriales_Incertae_sedis	Natranaerovirga	Natranaerovirga pectinivora	Mangrove: Water	uTitan(L):uTitan(F)	Natranaerovirga pectinivora	0	77	77
sp2568	15.886	-22.2171	3.90998	-5.68216	1.33E-08	1.04E-06	Bacteria	Bacteria_none	Proteobacteria	Alphaproteobacteria	Rhodobacterales	Roseobacteraceae	Leisingera	Leisingera aquimarina	Coral2	uTitan(L):Qiagen	Leisingera aquimarina	0	139	139
sp2367	13.8073	-22.2297	3.33627	-6.66303	2.68E-11	8.04E-09	Bacteria	Bacteria_none	Proteobacteria	Epsilonproteobacteria	Campylobacterales	Campylobacteraceae	Campylobacter	Campylobacter massiliensis	Mangrove: Sediment	uTitan(L):Qiagen	Campylobacter massiliensis	0	77	77
sp2564	16.1145	-22.2374	3.90993	-5.68741	1.29E-08	1.04E-06	Bacteria	Bacteria_none	Proteobacteria	Gammaproteobacteria	Cellvibrionales	Halieaceae	Seongchinamella	Seongchinamella unica	Coral2	uTitan(L):Qiagen	Seongchinamella unica	0	141	141
sp2907	21.52	-22.2439	3.90882	-5.69068	1.27E-08	2.96E-07	Bacteria	Bacteria_none	Proteobacteria	Gammaproteobacteria	Enterobacterales	Enterobacteriaceae	Cedecea	Cedecea colo	Coral2	uTitan(L):uTitan(F)	Cedecea colo	0	183	183
sp3601	18.6483	-22.251	3.11522	-7.14267	9.15E-13	2.19E-10	Bacteria	Bacteria_none	Tenericutes	Mollicutes	Acholeplasmatales	Acholeplasmataceae	Acholeplasma	Acholeplasma vituli	Mangrove: Sediment	uTitan(L):uTitan(F)	Acholeplasma vituli	0	105	105
sp1602	35.7945	-22.3102	2.69197	-8.2877	1.15E-16	1.29E-13	Bacteria	Bacteria_none	Lentisphaerae	Lentisphaeria	Victivallales	Victivallaceae	Victivallis	Victivallis lenta	Mangrove: Sediment	uTitan(L):uTitan(F)	Victivallis lenta	0	95	95
sp3590	22.606	-22.3631	3.19876	-6.99116	2.73E-12	1.17E-09	Bacteria	Bacteria_none	Firmicutes	Bacilli	Bacillales	Bacillaceae	Salibacterium	Salibacterium salarium	Mangrove: Sediment	uTitan(L):Qiagen	Salibacterium salarium	0	141	141
sp4343	15.602	-22.4131	3.29732	-6.79738	1.07E-11	3.91E-09	Bacteria	Bacteria_none	Bacteroidota	Cytophagia	Cytophagales	Cyclobacteriaceae	Litoribacter	Litoribacter ruber	Mangrove: Sediment	uTitan(L):Qiagen	Litoribacter ruber	0	85	85
sp2749	20.9572	-22.4169	3.09288	-7.24791	4.23E-13	1.09E-10	Bacteria	Bacteria_none	Firmicutes	Bacilli	Lactobacillales	Streptococcaceae	Streptococcus	Streptococcus thermophilus	Mangrove: Sediment	uTitan(L):uTitan(F)	Streptococcus thermophilus	0	118	118
sp1659	14.7756	-22.494	3.27531	-6.86775	6.52E-12	9.66E-10	Bacteria	Bacteria_none	Proteobacteria	Gammaproteobacteria	Nevskiales	Steroidobacteraceae	Steroidobacter	Steroidobacter agaridevorans	Mangrove: Water	uTitan(L):uTitan(F)	Steroidobacter agaridevorans	0	96	96
sp1982	27.0215	-22.5401	3.9084	-5.76709	8.07E-09	2.83E-07	Bacteria	Bacteria_none	Proteobacteria	Betaproteobacteria	Burkholderiales	Oxalobacteraceae	Noviherbaspirillum	Noviherbaspirillum suwonense	Coral2	uTitan(L):uTitan(F)	Noviherbaspirillum suwonense	0	123	123
sp2260	27.6349	-22.5797	3.90837	-5.77729	7.59E-09	2.83E-07	Bacteria	Bacteria_none	Proteobacteria	Gammaproteobacteria	Thiotrichales	Francisellaceae	Francisella	Francisella tularensis	Coral2	uTitan(L):uTitan(F)	Francisella tularensis	0	235	235
sp1664	20.8003	-22.5821	3.90922	-5.77663	7.62E-09	8.37E-07	Bacteria	Bacteria_none	Verrucomicrobia	Verrucomicrobiae	Verrucomicrobiales	Rubritaleaceae	Rubritalea	Rubritalea tangerina	Coral2	uTitan(L):Qiagen	Rubritalea tangerina	0	182	182
sp2073	16.0069	-22.5876	3.25027	-6.94943	3.67E-12	6.27E-10	Bacteria	Bacteria_none	Planctomycetota	Planctomycetia	Planctomycetales	Planctomycetaceae	Gimesia	Gimesia algae	Mangrove: Water	uTitan(L):uTitan(F)	Gimesia algae	0	104	104
sp3881	16.1263	-22.6102	3.2663	-6.92226	4.44E-12	7.05E-10	Bacteria	Bacteria_none	Firmicutes	Bacilli	Bacillales	Paenibacillaceae	Paenibacillus	Paenibacillus triticisoli	Mangrove: Water	uTitan(L):uTitan(F)	Paenibacillus triticisoli	0	73	73
sp1208	16.3779	-22.632	3.23564	-6.99457	2.66E-12	5.37E-10	Bacteria	Bacteria_none	Proteobacteria	Alphaproteobacteria	Hyphomicrobiales	Hyphomicrobiaceae	Methyloceanibacter	Methyloceanibacter caenitepidi	Mangrove: Water	uTitan(L):uTitan(F)	Methyloceanibacter caenitepidi	0	124	124
sp1768	16.789	-22.6645	3.2545	-6.96407	3.31E-12	6.12E-10	Bacteria	Bacteria_none	Proteobacteria	Alphaproteobacteria	Caulobacterales	Caulobacteraceae	Caulobacter	Caulobacter vibrioides	Mangrove: Water	uTitan(L):uTitan(F)	Caulobacter vibrioides	0	76	76
sp721	19.1976	-22.6968	3.38627	-6.7026	2.05E-11	1.73E-09	Bacteria	Bacteria_none	Tenericutes	Mollicutes	Entomoplasmatales	Spiroplasmataceae	Spiroplasma	Spiroplasma insolitum	Mangrove: Water	uTitan(L):Qiagen	Spiroplasma insolitum	0	112	112
sp3430	20.3743	-22.7708	3.22705	-7.05621	1.71E-12	1.10E-09	Bacteria	Bacteria_none	Cyanobacteria	Cyanobacteria_Incertae_sedis	Chroococcales	Aphanothecaceae	Gloeothece	Gloeothece bryophila	Mangrove: Sediment	uTitan(L):Qiagen	Gloeothece bryophila	0	111	111
sp3629	18.4912	-22.7848	3.20233	-7.11508	1.12E-12	2.49E-10	Bacteria	Bacteria_none	Proteobacteria	Alphaproteobacteria	Rickettsiales	Anaplasmataceae	Neorickettsia	Neorickettsia risticii	Mangrove: Water	uTitan(L):uTitan(F)	Neorickettsia risticii	0	140	140
sp1958	28.2762	-22.8227	3.01099	-7.57981	3.46E-14	2.00E-11	Bacteria	Bacteria_none	Firmicutes	Bacilli	Bacillales	Planococcaceae	Kurthia	Kurthia sibirica	Mangrove: Sediment	uTitan(L):uTitan(F)	Kurthia sibirica	0	460	460
sp3971	28.6419	-22.8346	3.07981	-7.4143	1.22E-13	3.72E-11	Bacteria	Bacteria_none	Bacteroidota	Cytophagia	Cytophagales	Cytophagaceae	Chryseosolibacter	Chryseosolibacter indicus	Mangrove: Sediment	uTitan(L):uTitan(F)	Chryseosolibacter indicus	0	65	65
sp3189	20.2082	-22.9138	3.18066	-7.20411	5.84E-13	1.44E-10	Bacteria	Bacteria_none	Bacteroidota	Cytophagia	Cytophagales	Marivirgaceae	Marivirga	Marivirga harenae	Mangrove: Water	uTitan(L):uTitan(F)	Marivirga harenae	0	153	153
sp3287	76.6722	-22.9227	3.03744	-7.54672	4.46E-14	2.00E-11	Bacteria	Bacteria_none	Firmicutes	Bacilli	Bacillales	Bacillaceae	Pueribacillus	Pueribacillus theae	Mangrove: Sediment	uTitan(L):uTitan(F)	Pueribacillus theae	0	174	174
sp3322	77.1128	-22.9253	3.0375	-7.54744	4.44E-14	2.00E-11	Bacteria	Bacteria_none	Firmicutes	Bacilli	Lactobacillales	Lactobacillaceae	Pediococcus	Pediococcus pentosaceus	Mangrove: Sediment	uTitan(L):uTitan(F)	Pediococcus pentosaceus	0	175	175
sp4590	31.7264	-22.9731	3.06916	-7.48513	7.15E-14	2.66E-11	Bacteria	Bacteria_none	Actinobacteria	Actinomycetia	Micrococcales	Demequinaceae	Demequina	Demequina rhizosphaerae	Mangrove: Sediment	uTitan(L):uTitan(F)	Demequina rhizosphaerae	0	72	72
sp1309	115.741	-23.0083	4.78506	-4.80836	1.52E-06	5.13E-05	Bacteria	Bacteria_none	Proteobacteria	Alphaproteobacteria	Hyphomicrobiales	Methylocystaceae	Methylocystis	Methylocystis silviterrae	Coral-W	uTitan(L):uTitan(F)	Methylocystis silviterrae	0	580	580
sp2005	37.8657	-23.0109	3.90793	-5.88824	3.90E-09	1.71E-07	Bacteria	Bacteria_none	Proteobacteria	Gammaproteobacteria	Enterobacterales	Erwiniaceae	Pantoea	Pantoea dispersa	Coral2	uTitan(L):uTitan(F)	Pantoea dispersa	0	322	322
sp4417	34.3703	-23.0814	3.06208	-7.53781	4.78E-14	2.00E-11	Bacteria	Bacteria_none	Bacteroidota	Cytophagia	Cytophagales	Cyclobacteriaceae	Algoriphagus	Algoriphagus aestuariicola	Mangrove: Sediment	uTitan(L):uTitan(F)	Algoriphagus aestuariicola	0	78	78
sp366	259.619	-23.2074	4.78489	-4.85015	1.23E-06	4.33E-05	Bacteria	Bacteria_none	Cyanobacteria	Cyanobacteria_Incertae_sedis	Pseudanabaenales	Oculatellaceae	Tildeniella	Tildeniella alaskaensis	Coral-W	uTitan(L):uTitan(F)	Tildeniella alaskaensis	0	1301	1301
sp2996	46.2243	-23.4715	2.69771	-8.70053	3.30E-18	5.53E-15	Bacteria	Bacteria_none	Cyanobacteria	Cyanobacteria_Incertae_sedis	Synechococcales	Synechococcales_Incertae_sedis	Altericista	Altericista violacea	Mangrove: Sediment	uTitan(L):uTitan(F)	Altericista violacea	0	115	115
sp2966	30.4853	-23.4748	3.13268	-7.4935	6.71E-14	2.68E-11	Bacteria	Bacteria_none	Firmicutes	Clostridia	Eubacteriales	Clostridiaceae	Alkaliphilus	Alkaliphilus halophilus	Mangrove: Water	uTitan(L):uTitan(F)	Alkaliphilus halophilus	0	138	138
sp1680	31.1481	-23.4978	3.12986	-7.50762	6.02E-14	2.68E-11	Bacteria	Bacteria_none	Proteobacteria	Betaproteobacteria	Burkholderiales	Comamonadaceae	Curvibacter	Curvibacter gracilis	Mangrove: Water	uTitan(L):uTitan(F)	Curvibacter gracilis	0	141	141
sp2866	32.5303	-23.5328	3.14454	-7.48369	7.23E-14	2.68E-11	Bacteria	Bacteria_none	Proteobacteria	Gammaproteobacteria	Methylococcales	Methylococcaceae	Methylotuvimicrobium	Methylotuvimicrobium alcaliphilum	Mangrove: Water	uTitan(L):uTitan(F)	Methylotuvimicrobium alcaliphilum	0	96	96
sp573	44.6293	-23.609	3.90791	-6.04132	1.53E-09	2.10E-07	Bacteria	Bacteria_none	Proteobacteria	Alphaproteobacteria	Holosporales	Holosporaceae	Holospora	Holospora caryophila	Coral2	uTitan(L):Qiagen	Holospora caryophila	0	176	176
sp2267	45.39	-23.6411	3.90789	-6.04957	1.45E-09	2.10E-07	Bacteria	Bacteria_none	Tenericutes	Mollicutes	Entomoplasmatales	Entomoplasmataceae	Mesoplasma	Mesoplasma lactucae	Coral2	uTitan(L):Qiagen	Mesoplasma lactucae	0	179	179
sp272	47.4293	-23.6994	3.90784	-6.06458	1.32E-09	2.10E-07	Bacteria	Bacteria_none	Proteobacteria	Gammaproteobacteria	Thiotrichales	Francisellaceae	Francisella	Francisella uliginis	Coral2	uTitan(L):Qiagen	Francisella uliginis	0	415	415
sp2690	38.171	-23.7505	3.08325	-7.70307	1.33E-14	9.84E-12	Bacteria	Bacteria_none	Firmicutes	Bacilli	Bacillales	Bacillaceae	Mesobacillus	Mesobacillus maritimus	Mangrove: Water	uTitan(L):uTitan(F)	Mesobacillus maritimus	0	289	289
sp993	192.484	-23.8403	4.78494	-4.98236	6.28E-07	2.49E-05	Bacteria	Bacteria_none	Cyanobacteria	Cyanobacteria_Incertae_sedis	Oscillatoriales	Microcoleaceae	Planktothrix	Planktothrix spiroides	Coral-W	uTitan(L):uTitan(F)	Planktothrix spiroides	0	1404	1404
sp2277	60.4952	-24.4008	2.56134	-9.52658	1.63E-21	3.61E-18	Bacteria	Bacteria_none	Proteobacteria	Gammaproteobacteria	Salinisphaerales	Salinisphaeraceae	Salinisphaera	Salinisphaera hydrothermalis	Mangrove: Water	uTitan(L):uTitan(F)	Salinisphaera hydrothermalis	0	357	357
sp1516	132.82	-24.5585	4.78543	-5.13194	2.87E-07	1.58E-05	Bacteria	Bacteria_none	Cyanobacteria	Cyanobacteria_Incertae_sedis	Oscillatoriales	Microcoleaceae	Planktothrix	Planktothrix serta	Coral-W	uTitan(L):Qiagen	Planktothrix serta	0	447	447
sp65	189.542	-24.6708	3.90697	-6.31457	2.71E-10	1.30E-08	Bacteria	Bacteria_none	Cyanobacteria	Cyanobacteria_Incertae_sedis	Pleurocapsales	Xenococcaceae	Foliisarcina	Foliisarcina bertiogensis	Coral1	uTitan(L):Qiagen	Foliisarcina bertiogensis	0	1685	1685
sp902	181.374	-25.3452	2.70516	-9.3692	7.31E-21	2.45E-17	Bacteria	Bacteria_none	Proteobacteria	Gammaproteobacteria	Vibrionales	Vibrionaceae	Enterovibrio	Enterovibrio coralii	Mangrove: Sediment	uTitan(L):uTitan(F)	Enterovibrio coralii	0	1033	1033

## Sheet: DESeqFamily
ASV ID	baseMean	log2FoldChange	lfcSE	stat	pvalue	padj	Superkingdom	Kingdom	Phylum	Class	Order	Family	Genus	Species	Biome	Method	Score1	Score2	Total
sp476	47.1876	8.46261	1.19053	7.10826	1.18e-12	5.78e-11	Bacteria	Bacteria_none	Proteobacteria	Oligoflexia	Bdellovibrionales	Bdellovibrionaceae	NA	NA	Mangrove: Water	xTitan(L):xTitan(F)	567	0	567
sp1098	31.3037	7.67621	1.11801	6.86594	6.61e-12	1.7e-10	Bacteria	Bacteria_none	Chloroflexi	Chloroflexi_Incertae_sedis	Chloroflexi_Incertae_sedis_Incertae_sedis	Chloroflexi_Incertae_sedis_Incertae_sedis_Incertae_sedis	NA	NA	Mangrove: Water	xTitan(L):Qiagen	433	0	433
sp1270	29.3216	7.58287	1.09272	6.93941	3.94e-12	1.17e-10	Bacteria	Bacteria_none	Proteobacteria	Alphaproteobacteria	Hyphomicrobiales	Methylobacteriaceae	NA	NA	Mangrove: Water	xTitan(L):Qiagen	410	0	410
sp1156	23.0753	7.43037	1.39668	5.32003	1.04e-07	2.3e-06	Bacteria	Bacteria_none	Fibrobacteres	Chitinivibrionia	Chitinivibrionales	Chitinivibrionaceae	NA	NA	Mangrove: Water	xTitan(L):xTitan(F)	275	0	275
sp1343	21.1321	7.30363	1.42802	5.11452	3.15e-07	6.64e-06	Bacteria	Bacteria_none	Verrucomicrobia	Opitutae	Opitutales	Opitutaceae	NA	NA	Mangrove: Water	xTitan(L):xTitan(F)	254	0	254
sp644	19.9259	7.21934	1.43978	5.0142	5.33e-07	1.03e-05	Bacteria	Bacteria_none	Firmicutes	Clostridia	Halanaerobiales	Halobacteroidaceae	NA	NA	Mangrove: Water	xTitan(L):xTitan(F)	244	0	244
sp1837	20.5683	7.06982	1.22127	5.78893	7.08e-09	1.05e-07	Bacteria	Bacteria_none	Proteobacteria	Gammaproteobacteria	Orbales	Orbaceae	NA	NA	Mangrove: Water	xTitan(L):Qiagen	281	0	281
sp972	19.0619	6.96117	1.19191	5.84034	5.21e-09	8.06e-08	Bacteria	Bacteria_none	Proteobacteria	Alphaproteobacteria	Hyphomicrobiales	Aurantimonadaceae	NA	NA	Mangrove: Water	xTitan(L):Qiagen	266	0	266
sp983	18.1486	6.89031	1.16309	5.92412	3.14e-09	5.06e-08	Bacteria	Bacteria_none	Cyanobacteria	Cyanobacteria_Incertae_sedis	Chroococcidiopsidales	Chroococcidiopsidaceae	NA	NA	Mangrove: Water	xTitan(L):Qiagen	253	0	253
sp1802	14.8451	6.60109	1.15727	5.70402	1.17e-08	1.68e-07	Bacteria	Bacteria_none	Acidobacteria	Acidobacteriia	Acidobacteriales	Acidobacteriaceae	NA	NA	Mangrove: Water	xTitan(L):Qiagen	208	0	208
sp1488	10.5996	6.30835	1.65931	3.80178	0.000143658	0.0019504	Bacteria	Bacteria_none	Chloroflexi	Ktedonobacteria	Ktedonobacterales	Ktedonobacteraceae	NA	NA	Mangrove: Water	xTitan(L):xTitan(F)	128	0	128
sp93	11.6065	6.24516	1.29206	4.83349	1.34e-06	1.15e-05	Bacteria	Bacteria_none	Proteobacteria	Gammaproteobacteria	Alteromonadales	Colwelliaceae	NA	NA	Mangrove: Water	xTitan(L):Qiagen	161	0	161
sp2713	9.91319	6.21182	1.6948	3.66523	0.000247117	0.0031278	Bacteria	Bacteria_none	Bacteroidota	Bacteroidia	Bacteroidales	Porphyromonadaceae	NA	NA	Mangrove: Water	xTitan(L):xTitan(F)	120	0	120
sp1795	11.0948	6.18072	1.20318	5.137	2.79e-07	2.95e-06	Bacteria	Bacteria_none	Proteobacteria	Alphaproteobacteria	Hyphomicrobiales	Aestuariivirgaceae	NA	NA	Mangrove: Water	xTitan(L):Qiagen	155	0	155
sp2524	10.8188	6.14361	1.20748	5.08796	3.62e-07	3.59e-06	Bacteria	Bacteria_none	Armatimonadetes	Armatimonadia	Capsulimonadales	Capsulimonadaceae	NA	NA	Mangrove: Water	xTitan(L):Qiagen	150	0	150
sp891	10.4093	6.08714	1.2515	4.86389	1.15e-06	1.01e-05	Bacteria	Bacteria_none	Firmicutes	Clostridia	Eubacteriales	Eubacteriaceae	NA	NA	Mangrove: Water	xTitan(L):Qiagen	143	0	143
sp2157	10.1647	6.05235	1.23585	4.89731	9.72e-07	8.95e-06	Bacteria	Bacteria_none	Actinobacteria	Actinomycetia	Micrococcales	Dermacoccaceae	NA	NA	Mangrove: Water	xTitan(L):Qiagen	139	0	139
sp807	10.1269	6.04916	1.26057	4.79876	1.6e-06	1.31e-05	Bacteria	Bacteria_none	Firmicutes	Clostridia	Thermoanaerobacterales	Thermoanaerobacteraceae	NA	NA	Mangrove: Water	xTitan(L):Qiagen	142	0	142
sp2067	9.76023	5.99499	1.31726	4.55112	5.34e-06	3.86e-05	Bacteria	Bacteria_none	Cyanobacteria	Cyanobacteria_Incertae_sedis	Chroococcales	Microcystaceae	NA	NA	Mangrove: Water	xTitan(L):Qiagen	135	0	135
sp1083	9.54438	5.96245	1.22557	4.86503	1.14e-06	1.01e-05	Bacteria	Bacteria_none	Planctomycetota	Phycisphaerae	Sedimentisphaerales	Sedimentisphaeraceae	NA	NA	Mangrove: Water	xTitan(L):Qiagen	132	0	132
sp1325	8.93974	5.8665	1.30491	4.49572	6.93e-06	4.88e-05	Bacteria	Bacteria_none	Proteobacteria	Gammaproteobacteria	Gammaproteobacteria_Incertae_sedis	Celerinatantimonadaceae	NA	NA	Mangrove: Water	xTitan(L):Qiagen	121	0	121
sp863	7.65488	5.83899	1.82128	3.20599	0.001346	0.0141971	Bacteria	Bacteria_none	Chloroflexi	Ardenticatenia	Ardenticatenales	Ardenticatenaceae	NA	NA	Mangrove: Water	xTitan(L):xTitan(F)	93	0	93
sp3571	7.37057	5.7832	1.88896	3.06158	0.00220174	0.0203203	Bacteria	Bacteria_none	Firmicutes	Bacilli	Lactobacillales	Aerococcaceae	NA	NA	Mangrove: Water	xTitan(L):xTitan(F)	86	0	86
sp3236	8.40812	5.7817	1.29391	4.46841	7.88e-06	5.45e-05	Bacteria	Bacteria_none	Firmicutes	Clostridia	Eubacteriales	Desulfitobacteriaceae	NA	NA	Mangrove: Water	xTitan(L):Qiagen	119	0	119
sp2764	8.0103	5.70863	1.34936	4.23062	2.33e-05	0.000140924	Bacteria	Bacteria_none	Cyanobacteria	Cyanobacteria_Incertae_sedis	Thermostichales	Thermostichaceae	NA	NA	Mangrove: Water	xTitan(L):Qiagen	109	0	109
sp3414	6.89312	5.68786	1.89064	3.00843	0.00262597	0.0232661	Bacteria	Bacteria_none	Proteobacteria	Zetaproteobacteria	Zetaproteobacteria_Incertae_sedis	Zetaproteobacteria_Incertae_sedis_Incertae_sedis	NA	NA	Mangrove: Water	xTitan(L):xTitan(F)	84	0	84
sp1001	7.77479	5.66875	1.29872	4.36487	1.27e-05	8.49e-05	Bacteria	Bacteria_none	Firmicutes	Bacilli	Bacillales	Thermoactinomycetaceae	NA	NA	Mangrove: Water	xTitan(L):Qiagen	110	0	110
sp592	7.30222	5.57779	1.40911	3.95837	7.55e-05	0.00041721	Bacteria	Bacteria_none	Firmicutes	Clostridia	Eubacteriales	Syntrophomonadaceae	NA	NA	Mangrove: Water	xTitan(L):Qiagen	103	0	103
sp3204	6.25967	5.54868	1.98866	2.79017	0.00526808	0.042432	Bacteria	Bacteria_none	Bacteroidota	Cytophagia	Cytophagales	Thermoflexibacteraceae	NA	NA	Mangrove: Water	xTitan(L):xTitan(F)	76	0	76
sp2626	6.59	5.42998	1.34011	4.05188	5.08e-05	0.000297919	Bacteria	Bacteria_none	Cyanobacteria	Cyanobacteria_Incertae_sedis	Spirulinales	Spirulinaceae	NA	NA	Mangrove: Water	xTitan(L):Qiagen	93	0	93
sp3571	6.41709	5.38753	1.41248	3.81423	0.000136607	0.000669202	Bacteria	Bacteria_none	Firmicutes	Bacilli	Lactobacillales	Aerococcaceae	NA	NA	Mangrove: Water	xTitan(L):Qiagen	86	0	86
sp3556	6.25821	5.35415	1.43181	3.73943	0.000184438	0.000859969	Bacteria	Bacteria_none	Proteobacteria	Gammaproteobacteria	Enterobacterales	Budviciaceae	NA	NA	Mangrove: Water	xTitan(L):Qiagen	87	0	87
sp1220	6.12637	5.32136	1.40083	3.79873	0.00014544	0.000703564	Bacteria	Bacteria_none	Proteobacteria	Gammaproteobacteria	Oceanospirillales	Oceanospirillales_Incertae_sedis	NA	NA	Mangrove: Water	xTitan(L):Qiagen	83	0	83
sp1745	6.05854	5.30705	1.33348	3.97985	6.9e-05	0.000386765	Bacteria	Bacteria_none	Proteobacteria	Alphaproteobacteria	Kordiimonadales	Temperatibacteraceae	NA	NA	Mangrove: Water	xTitan(L):Qiagen	84	0	84
sp3414	5.95719	5.28434	1.35911	3.88809	0.000101035	0.000535622	Bacteria	Bacteria_none	Proteobacteria	Zetaproteobacteria	Zetaproteobacteria_Incertae_sedis	Zetaproteobacteria_Incertae_sedis_Incertae_sedis	NA	NA	Mangrove: Water	xTitan(L):Qiagen	84	0	84
sp1395	5.85388	5.25842	1.36437	3.8541	0.000116154	0.000591469	Bacteria	Bacteria_none	Armatimonadetes	Fimbriimonadia	Fimbriimonadales	Fimbriimonadaceae	NA	NA	Mangrove: Water	xTitan(L):Qiagen	82	0	82
sp132	5.22881	5.09529	1.37612	3.70266	0.000213353	0.000982947	Bacteria	Bacteria_none	Fibrobacteres	Chitinispirillia	Chitinispirillales	Chitinispirillaceae	NA	NA	Mangrove: Water	xTitan(L):Qiagen	73	0	73
sp2663	5.07377	5.05065	1.38388	3.64963	0.00026262	0.0011957	Bacteria	Bacteria_none	Cyanobacteria	Cyanobacteria_Incertae_sedis	Cyanobacteria_Incertae_sedis_Incertae_sedis	Cyanobacteria_Incertae_sedis_Incertae_sedis_Incertae_sedis	NA	NA	Mangrove: Water	xTitan(L):Qiagen	70	0	70
sp2129	4.8644	4.99122	1.41564	3.52576	0.000422274	0.00179583	Bacteria	Bacteria_none	Proteobacteria	Alphaproteobacteria	Hyphomicrobiales	Notoacmeibacteraceae	NA	NA	Mangrove: Water	xTitan(L):Qiagen	68	0	68
sp2956	4.40293	4.84798	1.45605	3.32954	0.000869884	0.00347057	Bacteria	Bacteria_none	Actinobacteria	Thermoleophilia	Miltoncostaeales	Miltoncostaeaceae	NA	NA	Mangrove: Water	xTitan(L):Qiagen	62	0	62
sp2550	3.39571	4.47161	1.52556	2.93112	0.00337742	0.0117753	Bacteria	Bacteria_none	Cyanobacteria	Cyanobacteria_Incertae_sedis	Pleurocapsales	Dermocarpellaceae	NA	NA	Mangrove: Water	xTitan(L):Qiagen	47	0	47
sp159	254.651	3.81937	0.710604	5.37482	7.67e-08	8.73e-07	Bacteria	Bacteria_none	Proteobacteria	Gammaproteobacteria	Oceanospirillales	Endozoicomonadaceae	NA	NA	Mangrove: Water	xTitan(L):Qiagen	3325	77	3402
sp1296	156.583	3.50509	0.308507	11.3615	6.5e-30	8.39e-28	Bacteria	Bacteria_none	Proteobacteria	Gammaproteobacteria	Pseudomonadales	Pseudomonadaceae	NA	NA	Mangrove: Water	xTitan(L):Qiagen	1984	61	2045
sp22	2285.76	3.09437	0.277522	11.15	7.16e-29	5.54e-27	Bacteria	Bacteria_none	Proteobacteria	Gammaproteobacteria	Enterobacterales	Morganellaceae	NA	NA	Mangrove: Water	xTitan(L):Qiagen	28297	1115	29412
sp336	172.397	2.64369	0.358284	7.37875	1.6e-13	5.15e-12	Bacteria	Bacteria_none	Proteobacteria	Gammaproteobacteria	Alteromonadales	Pseudoalteromonadaceae	NA	NA	Mangrove: Water	xTitan(L):Qiagen	2075	111	2186
sp97	209.156	2.34525	0.344949	6.79883	1.05e-11	2.55e-10	Bacteria	Bacteria_none	Lentisphaerae	Lentisphaeria	Lentisphaerales	Lentisphaeraceae	NA	NA	Mangrove: Water	xTitan(L):Qiagen	2407	161	2568
sp128	733.937	2.24996	0.332487	6.76706	1.31e-11	5.82e-10	Bacteria	Bacteria_none	Proteobacteria	Alphaproteobacteria	Rhodospirillales	Stellaceae	NA	NA	Mangrove: Water	xTitan(L):xTitan(F)	7328	785	8113
sp1130	111.494	2.19911	0.401299	5.47998	4.25e-08	5.49e-07	Bacteria	Bacteria_none	Cyanobacteria	Cyanobacteria_Incertae_sedis	Nostocales	Nostocaceae	NA	NA	Mangrove: Water	xTitan(L):Qiagen	1267	94	1361
sp759	56.3154	2.12141	0.680081	3.11935	0.00181248	0.00674452	Bacteria	Bacteria_none	Proteobacteria	Gammaproteobacteria	Nevskiales	Algiphilaceae	NA	NA	Mangrove: Water	xTitan(L):Qiagen	631	53	684
sp30	380.118	2.0899	0.350958	5.95484	2.6e-09	4.38e-08	Bacteria	Bacteria_none	Firmicutes	Bacilli	Bacillales	Paenibacillaceae	NA	NA	Mangrove: Water	xTitan(L):Qiagen	4314	367	4681
sp340	492.064	2.04487	0.25811	7.92246	2.33e-15	9.01e-14	Bacteria	Bacteria_none	Proteobacteria	Gammaproteobacteria	Alteromonadales	Alteromonadaceae	NA	NA	Mangrove: Water	xTitan(L):Qiagen	5469	451	5920
sp1306	39.6765	2.04013	0.649506	3.14104	0.00168347	0.00638729	Bacteria	Bacteria_none	Tenericutes	Mollicutes	Anaeroplasmatales	Anaeroplasmataceae	NA	NA	Mangrove: Water	xTitan(L):Qiagen	451	39	490
sp241	515.597	2.03809	0.511919	3.98128	6.85e-05	0.00104708	Bacteria	Bacteria_none	Cyanobacteria	Cyanobacteria_Incertae_sedis	Oscillatoriales	Sirenicapillariaceae	NA	NA	Mangrove: Water	xTitan(L):xTitan(F)	4908	608	5516
sp232	256.556	2.01397	0.223161	9.02475	1.8e-19	8.71e-18	Bacteria	Bacteria_none	Actinobacteria	Actinomycetia	Glycomycetales	Glycomycetaceae	NA	NA	Mangrove: Water	xTitan(L):Qiagen	2826	246	3072
sp275	136.182	1.91723	0.413398	4.63775	3.52e-06	2.73e-05	Bacteria	Bacteria_none	Cyanobacteria	Cyanobacteria_Incertae_sedis	Oscillatoriales	Laspinemataceae	NA	NA	Mangrove: Water	xTitan(L):Qiagen	1508	136	1644
sp449	186.061	1.91298	0.413097	4.63083	3.64e-06	2.76e-05	Bacteria	Bacteria_none	Proteobacteria	Alphaproteobacteria	Hyphomicrobiales	Nitrobacteraceae	NA	NA	Mangrove: Water	xTitan(L):Qiagen	2049	194	2243
sp131	100.796	1.90209	0.418097	4.5494	5.38e-06	3.86e-05	Bacteria	Bacteria_none	Proteobacteria	Gammaproteobacteria	Oceanospirillales	Halomonadaceae	NA	NA	Mangrove: Water	xTitan(L):Qiagen	1120	105	1225
sp415	40.3655	1.89016	0.635515	2.97421	0.00293743	0.0105258	Bacteria	Bacteria_none	Proteobacteria	Gammaproteobacteria	Oceanospirillales	Hahellaceae	NA	NA	Mangrove: Water	xTitan(L):Qiagen	442	43	485
sp516	125.628	1.87358	0.306888	6.10508	1.03e-09	1.99e-08	Bacteria	Bacteria_none	Proteobacteria	Alphaproteobacteria	Hyphomicrobiales	Boseaceae	NA	NA	Mangrove: Water	xTitan(L):Qiagen	1360	127	1487
sp826	76.9985	1.82269	0.708879	2.57123	0.0101339	0.0316277	Bacteria	Bacteria_none	Proteobacteria	Deltaproteobacteria	Desulfuromonadales	Geobacteraceae	NA	NA	Mangrove: Water	xTitan(L):Qiagen	836	87	923
sp427	89.6624	1.80878	0.290417	6.22823	4.72e-10	1.01e-08	Bacteria	Bacteria_none	Proteobacteria	Alphaproteobacteria	Hyphomicrobiales	Parvibaculaceae	NA	NA	Mangrove: Water	xTitan(L):Qiagen	969	98	1067
sp10	4857.32	1.80687	0.222521	8.12002	4.66e-16	4.13e-14	Bacteria	Bacteria_none	Firmicutes	Negativicutes	Selenomonadales	Selenomonadaceae	NA	NA	Mangrove: Water	xTitan(L):xTitan(F)	44890	5983	50873
sp89	738.161	1.75339	0.183708	9.54443	1.37e-21	7.57e-20	Bacteria	Bacteria_none	Proteobacteria	Gammaproteobacteria	Chromatiales	Granulosicoccaceae	NA	NA	Mangrove: Water	xTitan(L):Qiagen	7876	806	8682
sp270	344.433	1.74939	0.218447	8.00832	1.16e-15	5e-14	Bacteria	Bacteria_none	Proteobacteria	Gammaproteobacteria	Pasteurellales	Pasteurellaceae	NA	NA	Mangrove: Water	xTitan(L):Qiagen	3662	377	4039
sp269	548.106	1.71556	0.314764	5.45032	5.03e-08	6.08e-07	Bacteria	Bacteria_none	Tenericutes	Mollicutes	Acholeplasmatales	Acholeplasmataceae	NA	NA	Mangrove: Water	xTitan(L):Qiagen	5821	609	6430
sp728	65.784	1.63466	0.273194	5.98351	2.18e-09	3.84e-08	Bacteria	Bacteria_none	Lentisphaerae	Lentisphaeria	Victivallales	Victivallaceae	NA	NA	Mangrove: Water	xTitan(L):Qiagen	691	78	769
sp291	379.483	1.48899	0.269778	5.51932	3.4e-08	7.93e-07	Bacteria	Bacteria_none	Cyanobacteria	Negativicutes	Oscillatoriales	Oscillatoriaceae	NA	NA	Mangrove: Water	xTitan(L):xTitan(F)	3362	593	3955
sp318	276.861	1.38256	0.395801	3.49305	0.00047753	0.00200874	Bacteria	Bacteria_none	Cyanobacteria	Cyanobacteria_Incertae_sedis	Pseudanabaenales	Oculatellaceae	NA	NA	Mangrove: Water	xTitan(L):Qiagen	2857	380	3237
sp1491	79.6173	1.37475	0.349886	3.92913	8.53e-05	0.000458242	Bacteria	Bacteria_none	Bacteroidota	Bacteroidia	Bacteroidales	Prevotellaceae	NA	NA	Mangrove: Water	xTitan(L):Qiagen	788	105	893
sp550	111.911	1.3376	0.376036	3.5571	0.000374972	0.0016305	Bacteria	Bacteria_none	Proteobacteria	Gammaproteobacteria	Cardiobacteriales	Cardiobacteriaceae	NA	NA	Mangrove: Water	xTitan(L):Qiagen	1102	148	1250
sp989	75.7654	1.31535	0.350615	3.75153	0.000175757	0.000829486	Bacteria	Bacteria_none	Proteobacteria	Alphaproteobacteria	Rickettsiales	Anaplasmataceae	NA	NA	Mangrove: Water	xTitan(L):Qiagen	742	102	844
sp104	159.767	1.21828	0.363085	3.35536	0.000792622	0.00877829	Bacteria	Bacteria_none	Actinobacteria	Negativicutes	Streptomycetales	Streptomycetaceae	NA	NA	Mangrove: Water	xTitan(L):xTitan(F)	1348	325	1673
sp204	285.406	1.19668	0.290928	4.11332	3.9e-05	0.000232209	Bacteria	Bacteria_none	Proteobacteria	Gammaproteobacteria	Oceanospirillales	Alcanivoracaceae	NA	NA	Mangrove: Water	xTitan(L):Qiagen	2752	407	3159
sp109	356.729	1.12415	0.182042	6.17521	6.61e-10	1.35e-08	Bacteria	Bacteria_none	Verrucomicrobia	Opitutae	Puniceicoccales	Puniceicoccaceae	NA	NA	Mangrove: Water	xTitan(L):Qiagen	3381	546	3927
sp185	694.34	1.11691	0.221942	5.03243	4.84e-07	4.69e-06	Bacteria	Bacteria_none	Firmicutes	Clostridia	Eubacteriales	Peptostreptococcaceae	NA	NA	Mangrove: Water	xTitan(L):Qiagen	6561	1033	7594
sp5	2593.89	1.0898	0.412993	2.63879	0.0083203	0.0266112	Bacteria	Bacteria_none	Bacteroidota	Flavobacteriia	Flavobacteriales	Schleiferiaceae	NA	NA	Mangrove: Water	xTitan(L):Qiagen	24475	3852	28327
sp400	96.5324	1.06389	0.276027	3.85431	0.000116057	0.000591469	Bacteria	Bacteria_none	Proteobacteria	Gammaproteobacteria	Oceanospirillales	Saccharospirillaceae	NA	NA	Mangrove: Water	xTitan(L):Qiagen	905	150	1055
sp429	34.6156	1.04726	0.356002	2.94172	0.00326395	0.0115885	Bacteria	Bacteria_none	Firmicutes	Clostridia	Eubacteriales	Desulfotomaculaceae	NA	NA	Mangrove: Water	xTitan(L):Qiagen	326	55	381
sp465	214.213	1.03707	0.285286	3.63519	0.000277781	0.00125001	Bacteria	Bacteria_none	Firmicutes	Erysipelotrichia	Erysipelotrichales	Erysipelotrichaceae	NA	NA	Mangrove: Water	xTitan(L):Qiagen	2010	351	2361
sp121	634.973	1.00964	0.27855	3.62463	0.000289377	0.00128723	Bacteria	Bacteria_none	Cyanobacteria	Cyanobacteria_Incertae_sedis	Nostocales	Hapalosiphonaceae	NA	NA	Mangrove: Water	xTitan(L):Qiagen	5869	993	6862
sp52	1727.48	1.00547	0.220663	4.55656	5.2e-06	9.21e-05	Bacteria	Bacteria_none	Cyanobacteria	Negativicutes	Pseudanabaenales	Leptolyngbyaceae	NA	NA	Mangrove: Water	xTitan(L):xTitan(F)	13757	3410	17167
sp229	50.091	1.00289	0.377423	2.6572	0.0078793	0.0254108	Bacteria	Bacteria_none	Proteobacteria	Gammaproteobacteria	Oceanospirillales	Aestuariirhabdaceae	NA	NA	Mangrove: Water	xTitan(L):Qiagen	462	78	540
sp23	1178.87	0.997165	0.127381	7.82819	4.95e-15	2.74e-13	Bacteria	Bacteria_none	Actinobacteria	Negativicutes	Micrococcales	Ornithinimicrobiaceae	NA	NA	Mangrove: Water	xTitan(L):xTitan(F)	9455	2438	11893
sp589	93.5419	0.963301	0.320827	3.00256	0.00267721	0.00968298	Bacteria	Bacteria_none	Proteobacteria	Alphaproteobacteria	Hyphomicrobiales	Hyphomicrobiales_Incertae_sedis	NA	NA	Mangrove: Water	xTitan(L):Qiagen	862	150	1012
sp249	403.482	0.954502	0.284495	3.35507	0.000793452	0.0031986	Bacteria	Bacteria_none	Proteobacteria	Alphaproteobacteria	Hyphomicrobiales	Methylocystaceae	NA	NA	Mangrove: Water	xTitan(L):Qiagen	3671	640	4311
sp124	683.031	0.91651	0.21094	4.34488	1.39e-05	9.01e-05	Bacteria	Bacteria_none	Proteobacteria	Alphaproteobacteria	Hyphomicrobiales	Devosiaceae	NA	NA	Mangrove: Water	xTitan(L):Qiagen	6161	1117	7278
sp75	838.552	0.887929	0.230826	3.84675	0.000119695	0.00171048	Bacteria	Bacteria_none	Bacteroidota	Negativicutes	Cytophagales	Reichenbachiellaceae	NA	NA	Mangrove: Water	xTitan(L):xTitan(F)	6536	1737	8273
sp362	366.807	0.80323	0.189403	4.24086	2.23e-05	0.000379391	Bacteria	Bacteria_none	Firmicutes	Negativicutes	Eubacteriales	Oscillospiraceae	NA	NA	Mangrove: Water	xTitan(L):xTitan(F)	2824	838	3662
sp746	132.932	0.753683	0.196962	3.82654	0.000129958	0.00064479	Bacteria	Bacteria_none	Proteobacteria	Gammaproteobacteria	Thiotrichales	Thiotrichaceae	NA	NA	Mangrove: Water	xTitan(L):Qiagen	1165	243	1408
sp28	2826.24	0.741577	0.0939865	7.89025	3.02e-15	2.23e-13	Bacteria	Bacteria_none	Bacteroidota	Negativicutes	Cytophagales	Cytophagaceae	NA	NA	Mangrove: Water	xTitan(L):xTitan(F)	21213	6355	27568
sp166	397.574	0.740594	0.169291	4.37468	1.22e-05	8.26e-05	Bacteria	Bacteria_none	Firmicutes	Clostridia	Eubacteriales	Lachnospiraceae	NA	NA	Mangrove: Water	xTitan(L):Qiagen	3451	721	4172
sp83	351.738	0.739571	0.174337	4.2422	2.21e-05	0.000135963	Bacteria	Bacteria_none	Proteobacteria	Gammaproteobacteria	Cellvibrionales	Cellvibrionaceae	NA	NA	Mangrove: Water	xTitan(L):Qiagen	3044	640	3684
sp105	479.183	0.726802	0.303061	2.3982	0.0164757	0.0494271	Bacteria	Bacteria_none	Cyanobacteria	Cyanobacteria_Incertae_sedis	Oscillatoriales	Cyanothecaceae	NA	NA	Mangrove: Water	xTitan(L):Qiagen	4139	847	4986
sp2	43186.8	0.721475	0.0917768	7.86119	3.8e-15	2.41e-13	Bacteria	Bacteria_none	Proteobacteria	Negativicutes	Pelagibacterales	Pelagibacteraceae	NA	NA	Mangrove: Water	xTitan(L):xTitan(F)	323959	100718	424677
sp3	12945.2	0.71495	0.110503	6.46994	9.8e-11	3.34e-09	Bacteria	Bacteria_none	Actinobacteria	Negativicutes	Micrococcales	Microbacteriaceae	NA	NA	Mangrove: Water	xTitan(L):xTitan(F)	96808	29801	126609
sp257	419.329	0.703585	0.161951	4.34443	1.4e-05	9.01e-05	Bacteria	Bacteria_none	Proteobacteria	Alphaproteobacteria	Rhodospirillales	Thalassospiraceae	NA	NA	Mangrove: Water	xTitan(L):Qiagen	3586	764	4350
sp11	9743.46	0.630171	0.100109	6.29482	3.08e-10	7.01e-09	Bacteria	Bacteria_none	Proteobacteria	Gammaproteobacteria	Oceanospirillales	Oceanospirillaceae	NA	NA	Mangrove: Water	xTitan(L):Qiagen	82161	18630	100791
sp110	843.667	0.61568	0.20127	3.05898	0.00222092	0.00810847	Bacteria	Bacteria_none	Proteobacteria	Alphaproteobacteria	Hyphomicrobiales	Phyllobacteriaceae	NA	NA	Mangrove: Water	xTitan(L):Qiagen	7057	1580	8637
sp7	27555.5	0.610509	0.171769	3.55425	0.000379065	0.00453853	Bacteria	Bacteria_none	Bacteroidota	Negativicutes	Flavobacteriales	Flavobacteriaceae	NA	NA	Mangrove: Water	xTitan(L):xTitan(F)	199583	62118	261701
sp313	92.6046	0.604462	0.206219	2.93116	0.00337695	0.0117753	Bacteria	Bacteria_none	Kiritimatiellaeota	Tichowtungiia	Tichowtungiales	Tichowtungiaceae	NA	NA	Mangrove: Water	xTitan(L):Qiagen	776	178	954
sp25	9001.24	0.5723	0.155245	3.68643	0.000227422	0.00296317	Bacteria	Bacteria_none	Proteobacteria	Negativicutes	Rhodobacterales	Roseobacteraceae	NA	NA	Mangrove: Water	xTitan(L):xTitan(F)	64270	22374	86644
sp11	11499.4	0.545874	0.108268	5.04189	4.61e-07	9.28e-06	Bacteria	Bacteria_none	Proteobacteria	Negativicutes	Oceanospirillales	Oceanospirillaceae	NA	NA	Mangrove: Water	xTitan(L):xTitan(F)	82161	27967	110128
sp362	342.276	0.532878	0.167252	3.18608	0.00144214	0.00563746	Bacteria	Bacteria_none	Firmicutes	Clostridia	Eubacteriales	Oscillospiraceae	NA	NA	Mangrove: Water	xTitan(L):Qiagen	2824	676	3500
sp6	19798.9	0.464256	0.133264	3.48374	0.000494451	0.00561645	Bacteria	Bacteria_none	Proteobacteria	Negativicutes	Rhodobacterales	Rhodobacteraceae	NA	NA	Mangrove: Water	xTitan(L):xTitan(F)	137572	50701	188273
sp124	1171.26	-0.354502	0.126728	-2.79735	0.00515232	0.0422681	Bacteria	Bacteria_none	Proteobacteria	Negativicutes	Hyphomicrobiales	Devosiaceae	NA	NA	Mangrove: Water	xTitan(L):xTitan(F)	6161	3995	10156
sp79	375.049	-0.386794	0.134538	-2.87498	0.00404054	0.0137166	Bacteria	Bacteria_none	Proteobacteria	Oligoflexia	Bacteriovoracales	Halobacteriovoraceae	NA	NA	Mangrove: Water	xTitan(L):Qiagen	2248	1019	3267
sp293	255.207	-0.404591	0.139733	-2.89545	0.00378615	0.0129667	Bacteria	Bacteria_none	Bacteroidota	Saprospiria	Saprospirales	Saprospiraceae	NA	NA	Mangrove: Water	xTitan(L):Qiagen	1521	701	2222
sp230	324.771	-0.45335	0.163651	-2.77023	0.00560165	0.0183715	Bacteria	Bacteria_none	Proteobacteria	Gammaproteobacteria	Chromatiales	Thioalkalispiraceae	NA	NA	Mangrove: Water	xTitan(L):Qiagen	1902	898	2800
sp105	824.215	-0.479228	0.133039	-3.60217	0.000315567	0.00388323	Bacteria	Bacteria_none	Cyanobacteria	Negativicutes	Oscillatoriales	Cyanothecaceae	NA	NA	Mangrove: Water	xTitan(L):xTitan(F)	4139	2899	7038
sp19	168.126	-0.495411	0.178765	-2.7713	0.00558335	0.0183715	Bacteria	Bacteria_none	Planctomycetota	Phycisphaerae	Phycisphaerales	Phycisphaeraceae	NA	NA	Mangrove: Water	xTitan(L):Qiagen	970	479	1449
sp202	247.286	-0.628969	0.210119	-2.9934	0.00275891	0.0239646	Bacteria	Bacteria_none	Proteobacteria	Negativicutes	Hyphomicrobiales	Reyranellaceae	NA	NA	Mangrove: Water	xTitan(L):xTitan(F)	1163	917	2080
sp15	580.241	-0.6475	0.230785	-2.80565	0.00502159	0.0167531	Bacteria	Bacteria_none	Proteobacteria	Gammaproteobacteria	Chromatiales	Woeseiaceae	NA	NA	Mangrove: Water	xTitan(L):Qiagen	3158	1694	4852
sp632	319.477	-0.7012	0.218831	-3.2043	0.00135391	0.00534656	Bacteria	Bacteria_none	Proteobacteria	Betaproteobacteria	Burkholderiales	Burkholderiaceae	NA	NA	Mangrove: Water	xTitan(L):Qiagen	1693	943	2636
sp573	95.8237	-0.705618	0.284922	-2.47653	0.0132666	0.0401107	Bacteria	Bacteria_none	Proteobacteria	Alphaproteobacteria	Holosporales	Holosporaceae	NA	NA	Mangrove: Water	xTitan(L):Qiagen	512	293	805
sp347	264.9	-0.727256	0.192351	-3.78088	0.000156275	0.000746645	Bacteria	Bacteria_none	Cyanobacteria	Cyanobacteria_Incertae_sedis	Pseudanabaenales	Pseudanabaenaceae	NA	NA	Mangrove: Water	xTitan(L):Qiagen	1393	813	2206
sp102	454.111	-0.728901	0.206503	-3.52974	0.000415972	0.00178868	Bacteria	Bacteria_none	Bacteroidota	Saprospiria	Saprospirales	Haliscomenobacteraceae	NA	NA	Mangrove: Water	xTitan(L):Qiagen	2376	1379	3755
sp95	475.745	-0.756584	0.176714	-4.28141	1.86e-05	0.000115921	Bacteria	Bacteria_none	Proteobacteria	Gammaproteobacteria	Legionellales	Coxiellaceae	NA	NA	Mangrove: Water	xTitan(L):Qiagen	2483	1466	3949
sp162	109.399	-0.769609	0.228703	-3.36511	0.000765142	0.00311695	Bacteria	Bacteria_none	Proteobacteria	Deltaproteobacteria	Myxococcales	Sandaracinaceae	NA	NA	Mangrove: Water	xTitan(L):Qiagen	562	330	892
sp1130	286.252	-0.771045	0.202961	-3.79899	0.00014529	0.0019504	Bacteria	Bacteria_none	Cyanobacteria	Negativicutes	Nostocales	Nostocaceae	NA	NA	Mangrove: Water	xTitan(L):xTitan(F)	1267	1072	2339
sp913	125.919	-0.771213	0.251557	-3.06575	0.00217123	0.00800254	Bacteria	Bacteria_none	Proteobacteria	Betaproteobacteria	Burkholderiales	Sutterellaceae	NA	NA	Mangrove: Water	xTitan(L):Qiagen	645	375	1020
sp359	597.93	-0.777369	0.246194	-3.15754	0.00159105	0.00609641	Bacteria	Bacteria_none	Bacteroidota	Flavobacteriia	Flavobacteriales	Crocinitomicaceae	NA	NA	Mangrove: Water	xTitan(L):Qiagen	3059	1810	4869
sp36	2953.21	-0.778003	0.222343	-3.4991	0.000466823	0.00544218	Bacteria	Bacteria_none	Cyanobacteria	Negativicutes	Chroococcales	Chroococcaceae	NA	NA	Mangrove: Water	xTitan(L):xTitan(F)	13223	11192	24415
sp94	2175.84	-0.780326	0.124376	-6.27393	3.52e-10	1.11e-08	Bacteria	Bacteria_none	Cyanobacteria	Negativicutes	Nostocales	Calotrichaceae	NA	NA	Mangrove: Water	xTitan(L):xTitan(F)	9606	8255	17861
sp1981	75.1203	-0.805493	0.253694	-3.17506	0.00149803	0.00579738	Bacteria	Bacteria_none	Actinobacteria	Actinomycetia	Micromonosporales	Micromonosporaceae	NA	NA	Mangrove: Water	xTitan(L):Qiagen	379	231	610
sp1498	171.111	-0.815083	0.210939	-3.86406	0.000111516	0.0005832	Bacteria	Bacteria_none	Bacteroidota	Bacteroidia	Bacteroidales	Rikenellaceae	NA	NA	Mangrove: Water	xTitan(L):Qiagen	868	539	1407
sp46	262.953	-0.827667	0.322871	-2.56346	0.0103634	0.0318705	Bacteria	Bacteria_none	Bacteroidota	Cytophagia	Cytophagales	Fulvivirgaceae	NA	NA	Mangrove: Water	xTitan(L):Qiagen	1301	812	2113
sp544	421.814	-0.880957	0.182865	-4.81752	1.45e-06	1.22e-05	Bacteria	Bacteria_none	Actinobacteria	Actinomycetia	Corynebacteriales	Nocardiaceae	NA	NA	Mangrove: Water	xTitan(L):Qiagen	2056	1315	3371
sp7	41134.1	-0.883749	0.157685	-5.60451	2.09e-08	2.89e-07	Bacteria	Bacteria_none	Bacteroidota	Flavobacteriia	Flavobacteriales	Flavobacteriaceae	NA	NA	Mangrove: Water	xTitan(L):Qiagen	199583	128195	327778
sp1	55024.1	-0.896777	0.169817	-5.28085	1.29e-07	1.42e-06	Bacteria	Bacteria_none	Cyanobacteria	Cyanobacteria_Incertae_sedis	Synechococcales	Prochlorococcaceae	NA	NA	Mangrove: Water	xTitan(L):Qiagen	265472	171436	436908
sp223	464.901	-0.903441	0.177145	-5.10002	3.4e-07	3.46e-06	Bacteria	Bacteria_none	Verrucomicrobia	Verrucomicrobiae	Verrucomicrobiales	Verrucomicrobiaceae	NA	NA	Mangrove: Water	xTitan(L):Qiagen	2261	1494	3755
sp78	111.043	-0.919557	0.227797	-4.03674	5.42e-05	0.000313065	Bacteria	Bacteria_none	Candidatus Melainabacteria	Candidatus Melainabacteria_Incertae_sedis	Vampirovibrionales	Vampirovibrionales_Incertae_sedis	NA	NA	Mangrove: Water	xTitan(L):Qiagen	532	353	885
sp2106	60.1805	-0.933628	0.322406	-2.89581	0.00378176	0.0129667	Bacteria	Bacteria_none	Proteobacteria	Epsilonproteobacteria	Campylobacterales	Thiovulaceae	NA	NA	Mangrove: Water	xTitan(L):Qiagen	287	192	479
sp114	246.89	-0.970567	0.179065	-5.42018	5.95e-08	6.98e-07	Bacteria	Bacteria_none	Tenericutes	Mollicutes	Entomoplasmatales	Spiroplasmataceae	NA	NA	Mangrove: Water	xTitan(L):Qiagen	1163	805	1968
sp1225	94.8415	-0.980794	0.288709	-3.39717	0.000680872	0.00283331	Bacteria	Bacteria_none	Actinobacteria	Actinomycetia	Streptosporangiales	Thermomonosporaceae	NA	NA	Mangrove: Water	xTitan(L):Qiagen	440	302	742
sp410	294.918	-0.989312	0.312469	-3.16611	0.00154491	0.0148782	Bacteria	Bacteria_none	Proteobacteria	Negativicutes	Hyphomicrobiales	Hyphomicrobiaceae	NA	NA	Mangrove: Water	xTitan(L):xTitan(F)	1195	1292	2487
sp163	45.283	-1.06383	0.314599	-3.38155	0.000720789	0.00296751	Bacteria	Bacteria_none	Actinobacteria	Actinomycetia	Streptosporangiales	Nocardiopsaceae	NA	NA	Mangrove: Water	xTitan(L):Qiagen	203	150	353
sp664	88.1633	-1.07938	0.228875	-4.716	2.41e-06	1.9e-05	Bacteria	Bacteria_none	Tenericutes	Tenericutes_Incertae_sedis	Mycoplasmoidales	Metamycoplasmataceae	NA	NA	Mangrove: Water	xTitan(L):Qiagen	394	293	687
sp846	119.76	-1.08078	0.385486	-2.80369	0.0050522	0.0422287	Bacteria	Bacteria_none	Cyanobacteria	Negativicutes	Nostocales	Rivulariaceae	NA	NA	Mangrove: Water	xTitan(L):xTitan(F)	463	535	998
sp41	55.595	-1.08107	0.346077	-3.12379	0.00178535	0.00670808	Bacteria	Bacteria_none	Rhodothermaeota	Rhodothermia	Rhodothermales	Salisaetaceae	NA	NA	Mangrove: Water	xTitan(L):Qiagen	251	186	437
sp367	356.239	-1.10776	0.348808	-3.17586	0.00149395	0.0148782	Bacteria	Bacteria_none	Cyanobacteria	Negativicutes	Pseudanabaenales	Prochlorotrichaceae	NA	NA	Mangrove: Water	xTitan(L):xTitan(F)	1367	1618	2985
sp179	429.012	-1.10917	0.288706	-3.84185	0.000122108	0.000613713	Bacteria	Bacteria_none	Proteobacteria	Deltaproteobacteria	Desulfobacterales	Desulfocapsaceae	NA	NA	Mangrove: Water	xTitan(L):Qiagen	1897	1398	3295
sp67	269.093	-1.10974	0.199326	-5.56745	2.58e-08	3.45e-07	Bacteria	Bacteria_none	Chloroflexi	Chloroflexia	Chloroflexales	Oscillochloridaceae	NA	NA	Mangrove: Water	xTitan(L):Qiagen	1196	907	2103
sp1158	96.2478	-1.15814	0.24501	-4.7269	2.28e-06	1.84e-05	Bacteria	Bacteria_none	Actinobacteria	Actinomycetia	Propionibacteriales	Propionibacteriaceae	NA	NA	Mangrove: Water	xTitan(L):Qiagen	414	319	733
sp263	233.452	-1.16412	0.194247	-5.99298	2.06e-09	3.8e-08	Bacteria	Bacteria_none	Proteobacteria	Epsilonproteobacteria	Campylobacterales	Helicobacteraceae	NA	NA	Mangrove: Water	xTitan(L):Qiagen	1000	797	1797
sp393	96.9722	-1.2069	0.235041	-5.13483	2.82e-07	2.95e-06	Bacteria	Bacteria_none	Proteobacteria	Alphaproteobacteria	Rickettsiales	Rickettsiales_Incertae_sedis	NA	NA	Mangrove: Water	xTitan(L):Qiagen	407	325	732
sp333	22.5578	-1.2387	0.437544	-2.83104	0.00463968	0.0156135	Bacteria	Bacteria_none	Ignavibacteriae	Ignavibacteria	Ignavibacteriales	Melioribacteraceae	NA	NA	Mangrove: Water	xTitan(L):Qiagen	93	76	169
sp822	44.9283	-1.32576	0.528829	-2.50696	0.0121773	0.0371073	Bacteria	Bacteria_none	Planctomycetota	Planctomycetia	Pirellulales	Thermoguttaceae	NA	NA	Mangrove: Water	xTitan(L):Qiagen	179	155	334
sp540	36.1332	-1.35956	0.526564	-2.58194	0.00982476	0.0309121	Bacteria	Bacteria_none	Proteobacteria	Epsilonproteobacteria	Nautiliales	Nautiliaceae	NA	NA	Mangrove: Water	xTitan(L):Qiagen	141	129	270
sp731	188.251	-1.36515	0.198099	-6.89123	5.53e-12	1.53e-10	Bacteria	Bacteria_none	Proteobacteria	Betaproteobacteria	Burkholderiales	Alcaligenaceae	NA	NA	Mangrove: Water	xTitan(L):Qiagen	725	654	1379
sp430	296.913	-1.4049	0.231758	-6.06193	1.34e-09	3.97e-08	Bacteria	Bacteria_none	Proteobacteria	Negativicutes	Legionellales	Legionellaceae	NA	NA	Mangrove: Water	xTitan(L):xTitan(F)	989	1319	2308
sp412	22.9632	-1.40663	0.391243	-3.59527	0.00032405	0.00142508	Bacteria	Bacteria_none	Proteobacteria	Gammaproteobacteria	Cellvibrionales	Porticoccaceae	NA	NA	Mangrove: Water	xTitan(L):Qiagen	88	81	169
sp158	1727.77	-1.43356	0.293108	-4.89087	1e-06	1.85e-05	Bacteria	Bacteria_none	Cyanobacteria	Negativicutes	Pleurocapsales	Hyellaceae	NA	NA	Mangrove: Water	xTitan(L):xTitan(F)	5673	7690	13363
sp157	116.641	-1.45222	0.4586	-3.16664	0.00154212	0.0148782	Bacteria	Bacteria_none	Planctomycetota	Negativicutes	Isosphaerales	Isosphaeraceae	NA	NA	Mangrove: Water	xTitan(L):xTitan(F)	374	483	857
sp61	900.23	-1.50164	0.250697	-5.98984	2.1e-09	5.82e-08	Bacteria	Bacteria_none	Planctomycetota	Negativicutes	Planctomycetales	Planctomycetaceae	NA	NA	Mangrove: Water	xTitan(L):xTitan(F)	2827	4212	7039
sp1349	53.6426	-1.54164	0.585712	-2.63207	0.00848655	0.0269205	Bacteria	Bacteria_none	Bacteroidota	Chitinophagia	Chitinophagales	Chitinophagaceae	NA	NA	Mangrove: Water	xTitan(L):Qiagen	196	200	396
sp781	38.6103	-1.57609	0.320747	-4.9138	8.93e-07	8.43e-06	Bacteria	Bacteria_none	Spirochaetes	Spirochaetia	Leptospirales	Leptospiraceae	NA	NA	Mangrove: Water	xTitan(L):Qiagen	135	141	276
sp138	451.189	-1.58549	0.498276	-3.18195	0.00146285	0.0148782	Bacteria	Bacteria_none	Cyanobacteria	Negativicutes	Chroococcales	Aphanothecaceae	NA	NA	Mangrove: Water	xTitan(L):xTitan(F)	1378	2006	3384
sp23	2990.31	-1.75845	0.15714	-11.1904	4.54e-29	4.4e-27	Bacteria	Bacteria_none	Actinobacteria	Actinomycetia	Micrococcales	Ornithinimicrobiaceae	NA	NA	Mangrove: Water	xTitan(L):Qiagen	9455	11130	20585
sp95	899.602	-1.76334	0.299919	-5.87939	4.12e-09	1.07e-07	Bacteria	Bacteria_none	Proteobacteria	Negativicutes	Legionellales	Coxiellaceae	NA	NA	Mangrove: Water	xTitan(L):xTitan(F)	2483	4295	6778
sp3	31049.1	-1.78507	0.168788	-10.5758	3.86e-26	2.49e-24	Bacteria	Bacteria_none	Actinobacteria	Actinomycetia	Micrococcales	Microbacteriaceae	NA	NA	Mangrove: Water	xTitan(L):Qiagen	96808	116208	213016
[truncated: 140 more rows]
