# Supplementary material for: Microbial community characterization in Red Sea-derived samples using a field-deployable DNA extraction system and nanopore sequencing
Source: Research Square preprint supplement (doi:10.21203/rs.3.rs-5928577/v1), 2025-03-17
Supplement: Supplementary file 3 [file 75ef002ea4e316caf679eb73.xlsx]

## Sheet: Table 1_Samples
Code	Microbiome	Filtration method	DNA extraction system	ng DNA/ul	Yield (ng DNA /ml or g sample)	Number of raw 16S rRNA gene reads	Number of metagenomic reads after QC	Average length (bp metagenomic reads	Mbp or Gbp of metagenome information
C1	Coral 1 (Pocillopora sp.)	NA	xTitan in-field	0.34	28	1500	46817	690	26 Mbp
C2				2.1	168	152108	879117	1158	672.8 Mbp
C3				1.14	92	54300	274097	697	167.6 Mbp
C4	Coral 2 (Xenia sp.)			7.43	594	49358	7746738	1056	4.8 Gbp
C5				2.56	204	64027	2811936	1078	1.8 Gbp
C6				9.8	784	38526	15828963	1044	9.7 Gbp
C7	Seawater - corals	Innovaprep		0.39	0.01	1149798	57505	942	53.9 Mbp
C8				0.4	0.01	874022	51045	644	18.8 Mbp
C13	Coral 1 (Pocillopora sp.)	NA	Qiagen	11.5	1150	328746	4110536	1150	3.3 Gbp
C14				7.63	764	269312	7297338	1048	3.3 Gbp
C15				6.59	660	325096	5537680	1103	3.7 Gbp
C16	Coral 2 (Xenia sp.)			38	3800	243907	5282909	1704	7.1 Gbp
C17				47.3	4730	233412	5301277	1696	6.6 Gbp
C18				1.59	160	6096	288925	581	121.4 Mbp
C19	Seawater - corals	Millipore		18.2	0.6	271192	3988656	2549	3.3 Gbp
C20				17.9	0.59	147715	3730694	2578	3.6 Gbp
C25	Coral 1 (Pocillopora sp.)	NA	xTitan in-lab	0.274	22	7984	35634	423	14.4 Mbp
C26				0.456	36	11476	39811	390	13.9 Mbp
C27				0.44	36	9383	49819	367	16.5 Mbp
C28	Coral 2 (Xenia sp.)			9.66	772	178982	3723575	2689	4.2 Gbp
C29				4.06	324	72743	2220212	1236	1.9 Gbp
C30				1.6	128	92293	2497583	732	1.7 Gbp
C31	Seawater - corals	Innovaprep		0.564	0.01	657325	138965	1994	252.5 Mbp
C32				1.28	0.034	506110	436658	2004	769.2 Mbp
M1	Seawater - mangroves	Innovaprep	xTitan in-field	0.46	0.012	275670	845870	1018	459.5 Mbp
M2				1.08	0.028	500131	1505424	1038	963.5 Mbp
M3				1.11	0.029	396874	1828455	641	1.1 Gbp
M4				1.03	0.027	181336	1362089	1014	746 Mbp
M5	Mangrove sediments	NA		0.05	8	309487	31165	548	17.3 Mbp
M6				0.44	72	940476	368655	1199	278.4 Mbp
M7				0.05	8	103037	25855	567	14.5 Mbp
M8				0.31	48	811426	161519	1044	84.7 Mbp
M13	Seawater - mangroves	Millipore	Qiagen	21	0.7	307466	6563714	5003	4.3 Gbp
M14				18.3	0.61	296900	6425522	1109	4.6 Gbp
M15				19.1	0.636	280155	5727805	1071	3.5 Gbp
M16				17.2	0.573	239705	3804230	2537	2.9 Gbp
M17	Mangrove sediments	NA		26.2	5240	263363	2565590	1348	2.4 Gbp
M18				38.1	7620	310344	2751527	2758	3.1 Gbp
M19				21.8	4360	277181	9638630	2657	10.4 Gbp
M20				28.1	5620	264560	6199848	2685	7.4 Gbp
M25	Seawater - mangroves	Innovaprep	xTitan in-lab	1.39	0.037	724871	1440843	2588	1.8 Gbp
M26				2.49	0.066	653307	4088719	2539	4.2 Gbp
M27				2.3	0.061	650683	2787055	1286	2.9 Gbp
M28				2.55	0.068	579714	1362211	1564	2.1 Gbp
M29	Mangrove sediments	NA		0.373	60	608136	510026	1102	317.2 Mbp
M30				3.14	504	628168	36919	1063	19 Mbp
M31				0.295	48	632695	186057	1146	123 Mbp
M32				0.251	40	717365	162886	822	118.8 Mbp
